# Supplementary material for: Construction and validation of a predictive model for the risk of malnutrition in hospitalized patients over 65 years of age with malignant tumours: a single-centre retrospective cross-sectional study
Source: PeerJ. 2024 Dec 10;12:e18685. doi: 10.7717/peerj.18685 (PMC11639871; doi:10.7717/peerj.18685)
Supplement: Supplemental Information 4 [file peerj-12-18685-s004.xlsx]

## Sheet: 3387-peerjupload
Development Set Validation Set	No	Discharge time	kps	Subgroup	BMI	Age	Age Segmentation	sex（male=1，female=2）	Gender Classification	Height	Weight	Long-term bed-ridden	Marriage	Married Divorced Widowed etc	Household Rural Urban	Malignant Presence	Systematic	Presence of Secondary Classification as Stage IV	History of Surgery (last 12 months)	Hypertension	Diabetes	Coronary heart disease	Infection	Digestive bleeding	Thoracic and abdominal effusions	Total Protein	TP	Albumin Prealbumin	Prealbumin	WBC	Leukocytes	Neutrophils Percentage	Hemoglobin	Hemoglobin	NLR3.24	RBC	RBC	Pressure Volume Lymphocytes	Lymphocytes	Platelets	PLT100 to 300 Platelet	Pressure Volume	Mean Platelet Volume	Total Cholesterol	Triglycerides	High-density lipoprotein	Hyperlipidemia	Total bilirubin	Alanine aminotransferase
1	37	2021-07-01 08:02:33	1	0	25.3515	77	3	male	1	1.72	75	No	Married	1	#NULL!	0	Respiratory System	0	1	0	1	0	0	0	0	62	1	41	#NULL!	4.67	2.91	62.1	149	2	1	4.87	2	45	1.2	142	2	0.17	12.2	#NULL!	#NULL!	#NULL!	#NULL!	9.8	31
1	16	2021-07-01 08:53:13	1	0	30.6667	78	3	female	2	1.5	69	No	Married	1	#NULL!	0	Hematologic System	4	0	1	0	0	0	0	0	67	1	43	235.7	5.37	3.75	69.9	117	1	2	3.56	1	36.2	0.95	192	2	0.2	10.5	5.29	2.2	1.26	#NULL!	7.3	36
1	66	2021-07-01 09:16:25	2	1	19.0311	91	5	male	1	1.7	55	No	Married	1	#NULL!	0	Urinary System	0	0	0	0	0	1	0	0	59	1	30	91.8	333.3	8.79	59.3	63	1	2	4.28	2	21.9	1.76	245	2	0.21	8.5	2.29	0.69	0.86	1	7	13
1	78	2021-07-01 10:05:43	1	0	20.9042	71	2	male	1	1.68	59	No	Married	1	#NULL!	0	Reproductive System	0	0	0	0	0	0	0	0	65	1	30	#NULL!	4.62	14.23	81.8	166	2	2	7.04	2	50.9	1.73	314	3	0.33	10.4	#NULL!	#NULL!	#NULL!	#NULL!	20.1	21
1	29	2021-07-01 10:28:28	2	0	22.2222	67	1	female	2	1.5	50	No	Widowed	0	#NULL!	0	Reproductive System	0	1	1	1	0	0	0	0	77	2	44	278.3	4.69	2.7	57.4	144	2	1	4.67	2	43.5	1.7	182	2	0.14	7.9	#NULL!	#NULL!	#NULL!	#NULL!	9.3	20
1	8	2021-07-01 10:28:28	1	0	23.0469	73	2	male	1	1.6	59	No	Married	1	#NULL!	0	Digestive System	0	0	1	1	0	0	0	0	82	2	41	186.5	8.28	6.39	77.2	218	2	2	6.84	2	61	1.18	125	2	0.14	11.4	#NULL!	#NULL!	#NULL!	#NULL!	200	202
1	14	2021-07-01 12:53:46	1	0	23.8751	68	1	male	1	1.65	65	No	Other	3	#NULL!	0	Reproductive System	0	0	0	0	0	0	0	0	65	1	39	#NULL!	4.31	2.67	62.2	151	2	1	4.33	2	45.9	1.19	201	2	0.19	9.2	#NULL!	#NULL!	#NULL!	#NULL!	8.5	20
1	35	2021-07-02 09:33:07	1	0	23.1405	73	2	male	1	1.65	63	No	Married	1	#NULL!	0	Digestive System	0	1	1	1	0	0	0	0	73	2	38	281.2	4.5	3.17	70.8	113	1	2	3.46	1	35	0.78	141	2	0.16	11.6	#NULL!	#NULL!	#NULL!	#NULL!	12	28
1	42	2021-07-02 10:00:04	1	1	19.2234	76	3	female	2	1.53	45	No	Married	1	#NULL!	0	Urinary System	0	0	1	0	0	1	0	0	71	2	41	#NULL!	4.33	2.63	60.8	127	2	1	3.95	1	38.7	1.24	228	2	0.21	9.2	#NULL!	#NULL!	#NULL!	#NULL!	11.7	13
1	70	2021-07-02 10:15:09	2	1	14.867	73	2	male	1	1.63	39.5	No	Married	1	#NULL!	0	Digestive System	4	0	0	0	0	0	0	0	61	1	31	112.1	9.24	4.29	72.7	123	2	2	0.88	2	37.8	1.16	291	2	0.24	8.2	3.06	0.92	0.95	1	11.9	14
1	25	2021-07-03 09:37:22	2	0	22.2041	83	4	male	1	1.75	68	No	Married	1	#NULL!	0	Respiratory System	4	0	1	0	0	1	0	0	52	1	30	#NULL!	6.22	3.19	51.2	129	2	1	4.25	2	39.3	2.11	161	2	0.15	9.2	#NULL!	#NULL!	#NULL!	#NULL!	8.9	15
1	73	2021-07-03 09:52:06	2	1	19.9432	89	5	male	1	1.72	59	No	Married	1	#NULL!	1	Reproductive System	4	0	0	0	0	0	0	0	59	1	34	152.8	7.85	5.58	71.1	120	1	2	3.84	1	35	1.48	178	2	0.17	9.3	4.55	1.18	0.93	1	8.8	10
1	71	2021-07-03 10:38:07	2	1	19.6752	67	1	male	1	1.61	51	No	Married	1	#NULL!	0	Respiratory System	4	1	0	0	0	0	0	0	62	1	36	#NULL!	3.54	1.53	43.1	127	2	1	3.96	1	39.1	1.41	194	2	0.17	8.7	5.29	0.82	1.17	#NULL!	6.5	18
1	48	2021-07-03 10:51:29	2	1	20	77	3	female	2	1.5	45	No	Widowed	0	#NULL!	0	Respiratory System	0	1	0	0	0	1	0	0	66	1	34	#NULL!	20	16.21	81.1	131	2	2	4.35	2	40.5	2.92	181	2	0.18	10.2	4.59	0.76	1.58	0	16.7	12
1	38	2021-07-04 09:27:59	2	1	19.1001	81	4	male	1	1.65	52	No	Married	1	#NULL!	0	Urinary System	0	0	0	0	0	0	0	0	62	1	37	#NULL!	6.71	4.56	68	110	1	1	3.57	1	34	1.55	268	2	0.23	8.7	#NULL!	#NULL!	#NULL!	#NULL!	7.1	13
1	88	2021-07-05 09:47:59	2	0	21.4844	70	1	male	1	1.6	55	No	Married	1	#NULL!	0	Urinary System	0	1	0	0	0	1	0	0	60	1	39	#NULL!	3.1	1.56	50.2	124	2	1	4.17	2	36.9	1.16	194	2	0.16	8.3	#NULL!	#NULL!	#NULL!	#NULL!	8	9
1	53	2021-07-05 10:26:51	1	0	23.5294	77	3	male	1	1.7	68	No	Married	1	#NULL!	0	Respiratory System	4	0	0	1	0	0	0	0	82	2	36	181.2	13.18	10.86	82.4	128	2	2	4.11	2	40.4	1.34	203	2	0.23	11.4	3.98	2.08	0.62	1	11.8	102
1	39	2021-07-05 10:38:31	1	0	23.4375	68	1	female	2	1.6	60	No	Other	3	#NULL!	0	Respiratory System	0	0	0	0	0	0	0	0	72	2	42	#NULL!	8.7	7	80.5	157	2	2	5.11	2	49.1	1.31	285	2	0.32	11.1	#NULL!	#NULL!	#NULL!	#NULL!	13.3	37
1	90	2021-07-05 12:00:01	1	1	18.3594	88	5	male	1	1.6	47	No	Married	1	#NULL!	0	Urinary System	0	0	0	0	0	1	0	0	62	1	32	#NULL!	7.52	5.45	72.3	110	1	2	3.53	1	36	1.35	204	2	0.18	9.1	#NULL!	#NULL!	#NULL!	#NULL!	4	15
1	19	2021-07-05 14:21:47	2	0	22.4813	70	1	female	2	1.62	59	No	Married	1	#NULL!	0	Respiratory System	0	0	1	0	0	0	0	0	74	2	43	#NULL!	6.61	3.77	57	148	2	1	5.04	2	46	2.35	248	2	0.25	9.9	4.44	1.59	0.98	1	13.9	15
1	117	2021-07-05 15:01:49	2	0	22.7732	83	4	male	1	1.65	62	No	Married	1	#NULL!	0	Respiratory system	4	0	1	0	1	0	0	0	75	2	38	189.1	4.46	3.09	69.3	145	2	2	4.98	2	43	0.73	261	2	0.31	11.7	2.81	0.64	1.12	1	33.4	17
1	58	2021-07-05 15:05:15	1	0	22.6474	67	1	male	1	1.72	67	No	Married	1	#NULL!	0	Respiratory System	4	0	0	0	0	0	0	0	71	2	37	#NULL!	4.99	2.95	59	102	1	1	3.36	1	31.9	1.17	92	1	0.08	9.3	#NULL!	#NULL!	#NULL!	#NULL!	3.6	14
1	23	2021-07-06 08:45:48	1	1	16.6525	86	5	male	1	1.68	47	No	Married	1	#NULL!	1	Respiratory System	4	0	0	0	0	0	0	0	61	1	29	84.2	6.2	5.39	86.9	116	1	2	3.88	1	35.2	0.35	204	2	0.18	8.9	3.98	0.85	0.99	1	12.7	18
1	113	2021-07-06 09:22:57	2	0	23.5102	77	3	male	1	1.75	72	No	Married	1	#NULL!	0	Digestive System	4	0	0	1	0	0	0	0	71	2	40	195.1	3.98	1.91	48	114	1	1	3.95	1	34.7	1.46	181	2	0.17	9.2	#NULL!	#NULL!	#NULL!	#NULL!	9.3	30
1	46	2021-07-06 10:56:16	1	0	22.0932	84	4	male	1	1.78	70	No	Married	1	#NULL!	0	Digestive System	0	0	0	1	0	0	0	0	66	1	43	196	6.7	6.19	92.5	151	2	2	5.11	2	45	0.25	130	2	0.13	9.7	#NULL!	#NULL!	#NULL!	#NULL!	13.2	26
1	15	2021-07-06 11:02:49	1	0	25.0995	66	1	male	1	1.67	70	No	Other	3	#NULL!	0	Respiratory System	0	0	0	0	0	0	0	0	74	2	42	127.4	6.43	4.71	73.3	158	2	2	5.33	2	47.4	1.34	194	2	0.19	9.6	4.14	0.69	0.96	1	16.3	21
1	111	2021-07-06 11:38:40	1	1	16.7872	68	1	male	1	1.76	52	No	Married	1	#NULL!	0	Respiratory system	4	0	0	0	0	0	0	0	67	1	34	#NULL!	5.21	3.08	59.1	120	1	1	3.78	1	37.7	1.42	377	3	0.34	9	3.77	0.67	1.14	1	6.5	11
1	82	2021-07-06 11:50:31	2	1	18.5185	66	1	male	1	1.8	60	No	Married	1	#NULL!	0	Respiratory System	0	0	0	0	0	0	0	0	61	1	37	#NULL!	7.38	5.19	70.3	149	2	2	4.51	2	46.6	1.55	505	3	0.45	8.9	4.35	1	0.79	1	15	22
1	41	2021-07-06 13:35:02	2	0	28.1943	65	1	female	2	1.53	66	No	Married	1	#NULL!	0	Respiratory System	4	0	1	0	0	0	0	0	70	2	41	179.5	4.11	2.39	58.2	136	2	1	4.77	2	41.5	1.39	219	2	0.21	9.4	5.91	1.26	1.37	#NULL!	11.9	16
1	55	2021-07-07 08:36:40	1	0	25.6837	67	1	female	2	1.45	54	No	Married	1	#NULL!	0	Digestive System	#NULL!	0	1	1	0	0	0	0	74	2	41	#NULL!	1.98	2.44	57.1	134	2	1	0.88	2	41.6	1.46	211	2	0.2	9.4	5.67	2.13	1.89	#NULL!	12.6	28
1	44	2021-07-07 08:55:33	1	1	18.6709	82	4	female	2	1.62	49	No	Married	1	#NULL!	0	Digestive System	4	0	1	0	1	0	0	0	71	2	39	156.2	6.14	4.47	73	126	2	2	4.13	2	39	1.12	219	2	0.22	10.1	4.7	0.83	1.46	0	23.2	41
1	154	2021-07-07 10:14:39	2	0	22.9421	74	2	male	1	1.59	58	No	Married	1	#NULL!	0	Reproductive System	#NULL!	0	0	0	0	0	0	1	64	1	30	89	3.01	1.83	60.9	121	2	1	3.76	1	36.9	0.92	61	1	0.08	12.6	3.5	0.88	1.29	0	41.2	20
1	151	2021-07-07 10:42:02	1	0	23.4221	71	2	female	2	1.56	57	No	Married	1	#NULL!	0	Digestive System	#NULL!	0	1	0	0	0	0	0	84	2	41	#NULL!	3.96	4.62	63.3	110	1	1	6.6	2	33.8	2.3	130	2	0.15	11.7	5.35	2.13	1.16	#NULL!	6.5	16
1	72	2021-07-07 10:46:55	1	0	26.0375	78	3	male	1	1.58	65	No	Married	1	#NULL!	0	Reproductive System	4	0	0	0	0	0	0	0	71	2	43	#NULL!	7.86	5.12	65.1	140	2	1	5.63	2	44.4	1.77	274	2	0.23	8.3	4.17	2.16	0.76	1	7.6	23
1	81	2021-07-07 15:05:33	1	0	23.3091	67	1	female	2	1.55	56	No	Married	1	#NULL!	0	Respiratory system	#NULL!	0	1	0	0	0	0	0	65	1	41	102.4	4.41	2.66	60.2	134	2	1	4.34	2	40	1.45	131	2	0.17	12.6	3.66	0.83	1.39	0	21.6	22
1	107	2021-07-08 10:31:43	1	1	20.202	86	5	male	1	1.65	55	No	Other	3	#NULL!	0	Reproductive System	#NULL!	0	0	0	0	0	0	0	71	2	42	#NULL!	4.02	2.31	57.2	126	2	1	3.63	1	37.4	1.35	156	2	0.13	8.3	#NULL!	#NULL!	#NULL!	#NULL!	18.5	15
1	24	2021-07-08 13:55:40	2	0	23.6244	86	5	male	1	1.62	62	No	Married	1	#NULL!	0	Digestive System	#NULL!	0	0	0	0	0	0	0	57	1	29	93.9	0.66	8.53	80.3	111	1	2	3.3	1	33.4	1.05	171	2	0.19	11.3	#NULL!	#NULL!	#NULL!	#NULL!	253.3	112
1	133	2021-07-08 15:01:14	1	1	17.9592	69	1	male	1	1.75	55	No	Married	1	#NULL!	0	Respiratory System	#NULL!	1	0	0	0	0	0	0	74	2	39	#NULL!	5.84	3.78	64.8	123	2	2	4	1	37.5	1.16	203	2	0.22	10.8	3.77	1.02	0.91	1	4.5	18
1	112	2021-07-09 08:46:55	2	1	20.8117	81	4	female	2	1.55	50	No	Married	1	#NULL!	0	Respiratory System	#NULL!	0	0	0	1	0	0	0	70	2	38	297.5	7.27	5.59	76.9	131	2	2	4.44	2	41.3	1.05	176	2	0.19	10.7	5.28	2.32	1.1	#NULL!	7.5	15
1	125	2021-07-09 09:23:42	2	0	22.0386	79	3	male	1	1.65	60	No	Married	1	#NULL!	0	Digestive System	#NULL!	1	1	0	0	0	0	0	62	1	34	192.9	11.88	4.77	60.8	114	1	1	3.5	1	35.1	2.51	190	2	0.2	10.6	4.22	1.11	1.07	1	10.1	12
1	128	2021-07-09 09:30:12	2	0	21.875	82	4	male	1	1.6	56	No	Married	1	#NULL!	0	Respiratory System	#NULL!	0	0	0	0	0	0	0	75	2	35	#NULL!	5.31	2.91	54.8	139	2	1	4.78	2	42.5	1.49	195	2	0.19	9.7	4.22	0.81	1.2	0	7.8	13
1	171	2021-07-09 11:19:17	2	0	23.8751	74	2	male	1	1.65	65	No	Married	1	#NULL!	0	Digestive System	4	1	1	0	0	0	0	0	82	2	44	212.6	7.82	5.78	74	148	2	2	5.11	2	46.2	1.48	168	2	0.18	10.5	5.66	1.88	0.96	#NULL!	16.2	18
1	150	2021-07-10 09:24:53	1	1	16.9796	69	1	male	1	1.75	52	No	Married	1	#NULL!	0	Digestive System	#NULL!	0	0	0	0	0	0	0	64	1	33	#NULL!	7.3	5.22	71.5	133	2	2	4.33	2	39.2	1.36	200	2	0.19	9.7	#NULL!	#NULL!	#NULL!	#NULL!	24.1	11
1	131	2021-07-10 10:31:34	2	0	20.8611	69	1	male	1	1.71	61	No	Married	1	#NULL!	0	Other	#NULL!	0	0	0	0	0	0	0	73	2	40	283.4	5.6	3.48	62.2	153	2	1	4.74	2	46.4	1.5	135	2	0.18	13.6	#NULL!	#NULL!	#NULL!	#NULL!	7.3	19
1	11	2021-07-12 11:08:34	1	0	25.462	70	1	male	1	1.61	66	No	Married	1	#NULL!	0	Respiratory System	4	0	0	0	0	0	0	0	67	1	43	#NULL!	5.82	4.01	69	148	2	1	4.65	2	44.7	1.37	224	2	0.23	10.3	#NULL!	#NULL!	#NULL!	#NULL!	9	16
1	91	2021-07-12 11:26:09	1	1	20.7612	78	3	male	1	1.7	60	No	Married	1	#NULL!	0	Respiratory System	#NULL!	1	1	0	1	0	0	0	61	1	37	#NULL!	8.72	4.31	49.5	144	2	1	4.66	2	44.6	3.45	224	2	0.24	10.6	2.66	1.25	0.86	1	13.2	17
1	120	2021-07-12 12:40:11	1	0	22.5827	65	1	male	1	1.63	60	No	Married	1	#NULL!	0	Respiratory System	#NULL!	0	0	0	0	0	0	0	67	1	38	206.3	6.43	3.72	57.7	153	2	1	4.82	2	45.8	2.05	204	2	0.16	7.7	#NULL!	#NULL!	#NULL!	#NULL!	7.1	20
1	62	2021-07-13 08:26:07	1	0	25.721	74	2	male	1	1.54	61	No	Married	1	#NULL!	0	Blood System	4	0	0	0	0	0	0	0	71	2	36	#NULL!	4.46	3.11	69.7	133	2	2	4.14	2	40	0.82	265	2	0.26	9.6	#NULL!	#NULL!	#NULL!	#NULL!	16.2	16
1	1	2021-07-13 09:55:08	1	0	26.3702	66	1	male	1	1.57	65	No	Married	1	#NULL!	0	Reproductive System	#NULL!	1	0	0	0	1	0	0	69	2	37	#NULL!	7.15	4.85	67.8	166	2	2	5.61	2	51.1	1.48	317	3	0.28	8.8	#NULL!	#NULL!	#NULL!	#NULL!	6.4	18
1	89	2021-07-13 10:14:34	1	1	19.9792	71	2	female	2	1.55	48	No	Married	1	#NULL!	0	Digestive System	4	0	0	0	0	0	0	0	72	2	42	222.1	4.75	3.67	77.2	136	2	2	4.36	2	42.2	0.74	181	2	0.18	9.8	#NULL!	#NULL!	#NULL!	#NULL!	33.9	17
1	57	2021-07-13 11:37:02	2	1	17.9282	67	1	male	1	1.67	50	No	Married	1	#NULL!	1	Reproductive System	4	0	1	0	0	0	0	0	51	1	26	118.6	4.75	3.19	67.3	78	1	1	2.82	1	24.6	1.01	123	2	0.11	9.1	3.48	1.77	0.79	1	13.3	9
1	17	2021-07-13 11:48:59	2	0	24.2215	67	1	male	1	1.7	70	No	Married	1	#NULL!	0	Respiratory System	#NULL!	0	0	0	0	0	0	0	78	2	43	332.9	4.76	3.04	63.9	150	2	1	4.89	2	46	1.42	223	2	0.24	10.7	#NULL!	#NULL!	#NULL!	#NULL!	12.9	21
1	137	2021-07-13 12:14:05	1	0	26.6667	75	2	male	1	1.5	60	No	Married	1	#NULL!	0	Respiratory System	4	0	1	0	1	0	0	0	70	2	37	#NULL!	7.13	4.93	69.2	161	2	1	5.21	2	49.5	1.61	124	2	0.15	12.2	2.81	1.04	1.13	1	20.5	17
1	36	2021-07-14 10:03:51	1	0	26.3656	66	1	male	1	1.72	78	No	Married	1	#NULL!	0	Respiratory system	#NULL!	0	1	0	0	0	0	0	72	2	40	#NULL!	6.89	4.68	67.8	144	2	1	4.93	2	43.7	1.74	183	2	0.24	12.9	5.52	2.92	1.17	#NULL!	27.9	26
1	65	2021-07-14 10:22:22	1	0	26.1719	77	3	male	1	1.6	67	No	Widowed	0	#NULL!	0	Reproductive System	#NULL!	0	1	0	0	0	0	0	67	1	35	#NULL!	6.46	3.57	55.2	132	2	1	4.42	2	39	2.15	194	2	0.19	10	5.3	3.07	0.89	#NULL!	3.5	16
1	20	2021-07-14 12:27:00	1	1	#NULL!	68	1	male	1	1.64	#NULL!	Yes	Married	1	#NULL!	1	Digestive System	#NULL!	0	1	1	0	1	0	0	51	1	25	43.4	20.3	18.23	89.8	85	1	2	2.85	1	26.7	1.28	116	2	0.1	8.2	1.98	0.85	0.4	1	18	64
1	170	2021-07-14 14:51:42	2	0	22.3081	74	2	male	1	1.64	60	No	Married	1	#NULL!	0	Respiratory System	4	0	1	1	0	0	0	0	76	2	40	#NULL!	6.19	3.81	61.4	117	1	1	3.82	1	36.1	1.76	90	1	0.1	10.9	4.21	1.99	1.17	1	15.4	46
1	166	2021-07-15 09:16:02	1	0	23.833	80	3	female	2	1.56	58	No	Married	1	#NULL!	0	Digestive System	4	0	0	0	0	0	0	0	74	2	37	120.8	5.03	2.45	48.7	128	2	1	3.96	1	38.8	1.84	163	2	0.15	9.1	4.41	0.97	1.16	0	21.2	15
1	138	2021-07-15 09:32:42	1	0	22.2222	66	1	female	2	1.5	50	No	Married	1	#NULL!	0	Respiratory System	#NULL!	0	0	0	0	0	0	0	81	2	50	#NULL!	6.35	2.94	46.2	161	2	1	4.85	2	47.6	2.87	237	2	0.23	9.7	4.43	1.17	1.04	1	15.7	56
1	156	2021-07-16 09:54:38	2	0	26.0375	67	1	female	2	1.58	65	No	Married	1	#NULL!	0	Respiratory System	#NULL!	0	1	0	0	0	0	0	78	2	44	#NULL!	4.6	2.13	46.3	140	2	1	4.76	2	43.3	2.06	200	2	0.2	9.8	3.02	1.37	0.91	1	13.3	32
1	162	2021-07-16 09:59:15	1	0	22.8374	75	2	male	1	1.7	66	No	Married	1	#NULL!	0	Reproductive System	0	0	0	1	0	0	0	0	75	2	42	#NULL!	9.26	5.42	58.6	143	2	1	4.73	2	44.2	2.69	258	2	0.25	9.5	#NULL!	#NULL!	#NULL!	#NULL!	8.5	18
1	119	2021-07-16 11:44:41	1	1	#NULL!	88	5	male	1	#NULL!	#NULL!	Yes	Married	1	#NULL!	0	Reproductive System	0	0	1	1	0	1	0	1	56	1	30	131.4	16.48	13.25	80.3	156	2	2	4.71	2	47.5	1.97	97	1	0.13	13.1	2	0.68	0.98	1	31.2	178
1	173	2021-07-17 09:17:58	2	0	27.0258	66	1	female	2	1.49	60	No	Widowed	0	#NULL!	0	Urinary System	0	0	1	0	0	0	0	0	73	2	41	#NULL!	6.43	3.57	55.5	148	2	1	4.78	2	45.3	2.23	323	3	0.27	8.4	3.94	2.1	0.99	1	9.9	27
1	3	2021-07-17 10:17:04	1	0	23.7253	82	4	female	2	1.55	57	No	Widowed	0	#NULL!	0	Reproductive System	0	0	0	0	1	1	0	0	54	1	29	#NULL!	10.21	8.93	87.5	121	2	2	3.78	1	35.7	0.33	252	2	0.27	10.6	#NULL!	#NULL!	#NULL!	#NULL!	17	14
1	218	2021-07-18 09:19:46	1	0	23.4952	78	3	male	1	1.53	55	No	Married	1	#NULL!	0	Digestive System	0	0	0	0	0	0	0	0	66	1	37	#NULL!	5.35	3.46	64.7	154	2	1	4.7	2	45.7	1.18	215	2	0.21	9.9	4.19	1.14	1.1	1	13.6	23
1	152	2021-07-19 08:06:00	1	0	25.3906	79	3	male	1	1.6	65	No	Married	1	#NULL!	0	Respiratory System	0	0	0	0	0	0	0	0	61	1	35	237.9	4.17	2.6	62.3	127	2	1	3.74	1	37.4	1.15	140	2	0.15	10.5	#NULL!	#NULL!	#NULL!	#NULL!	21	19
1	139	2021-07-19 08:22:13	1	0	33.3333	76	3	female	2	1.5	75	No	Widowed	0	#NULL!	0	Respiratory System	0	0	1	1	1	0	0	0	78	2	43	#NULL!	6.22	3.96	63.5	141	2	1	4.78	2	44.3	1.83	132	2	0.17	12.6	3.91	2.06	1.03	1	8.3	42
1	194	2021-07-19 09:15:59	1	1	17.7778	80	3	female	2	1.5	40	No	Married	1	#NULL!	0	Respiratory System	0	0	0	0	0	0	0	0	55	1	30	159.9	62.37	#NULL!	#NULL!	#NULL!	2	#NULL!	4.3	2	#NULL!	#NULL!	#NULL!	2	#NULL!	#NULL!	2.91	0.9	1.06	1	8.6	97
1	233	2021-07-19 10:17:36	2	0	26.1286	74	2	male	1	1.66	72	No	Married	1	#NULL!	0	Urinary System	0	0	1	0	0	0	0	0	67	1	40	#NULL!	5.37	3.77	70.3	171	2	1	5.33	2	51.6	1.2	145	2	0.15	10.5	#NULL!	#NULL!	#NULL!	#NULL!	23	23
1	122	2021-07-19 10:23:57	1	0	24.2188	70	1	male	1	1.6	62	No	Married	1	#NULL!	0	Digestive System	4	0	1	1	0	0	0	0	81	2	48	308.3	8.55	5.52	64.4	171	2	1	5.46	2	50	2.38	199	2	0.21	10.4	5.47	5.4	0.78	#NULL!	14.2	29
1	179	2021-07-19 10:48:23	1	0	25.0865	70	1	male	1	1.7	72.5	No	Married	1	#NULL!	0	Respiratory System	0	0	1	0	0	0	0	0	86	2	45	#NULL!	7.04	3.79	53.9	158	2	1	5.21	2	49.2	2.69	241	2	0.23	9.6	6.17	1.77	1.1	#NULL!	8.7	23
1	56	2021-07-19 15:48:08	1	1	18.6667	77	3	female	2	1.5	42	No	Other	3	#NULL!	0	Respiratory System	4	0	0	1	1	0	0	0	71	2	36	199	8.1	6.76	83.4	122	2	2	4.5	2	37.6	0.78	268	2	0.28	10.3	3.8	2.34	0.82	1	3.8	12
1	108	2021-07-20 08:35:16	2	0	33.2031	72	2	female	2	1.6	85	No	Widowed	0	#NULL!	0	Digestive System	0	0	1	1	1	0	0	0	72	2	36	#NULL!	6.83	3.75	55.1	103	1	1	3.27	1	31.7	1.91	151	2	0.13	8.9	#NULL!	#NULL!	#NULL!	#NULL!	4.3	15
1	226	2021-07-20 09:44:44	1	0	23.3377	70	1	female	2	1.59	59	No	Married	1	#NULL!	0	Respiratory System	0	0	0	0	0	0	0	0	76	2	41	#NULL!	5.74	3.11	54.2	136	2	1	4.37	2	40.2	2.19	266	2	0.26	9.9	4.01	1.05	1.35	0	13.8	15
1	80	2021-07-20 09:56:28	1	0	21.4533	75	2	male	1	1.7	62	No	Married	1	#NULL!	0	Respiratory System	0	0	1	0	0	0	0	0	60	1	26	#NULL!	5.52	3.13	56.6	139	2	1	4.78	2	43.6	1.58	289	2	0.29	10	3.78	0.78	1.1	1	12.9	30
1	28	2021-07-20 10:13:44	2	0	24.5578	65	1	female	2	1.55	59	No	Married	1	#NULL!	0	Respiratory System	0	0	0	0	0	0	0	0	72	2	39	#NULL!	7.11	2.77	39.1	134	2	1	4.48	2	41.3	3.4	248	2	0.24	9.5	4.42	1.37	0.84	1	6.5	21
1	262	2021-07-20 14:38:31	1	1	15.2219	89	5	female	2	1.58	38	No	Widowed	0	#NULL!	0	Respiratory System	4	0	0	0	1	0	0	1	62	1	27	#NULL!	5.47	3.73	68.4	126	2	2	3.86	1	38.9	1.03	190	2	0.19	9.8	3.78	1.08	1.08	1	13.4	13
1	142	2021-07-20 17:03:59	2	0	24.977	75	2	male	1	1.65	68	No	Married	1	#NULL!	0	Respiratory System	0	1	0	0	0	0	0	0	76	2	44	#NULL!	6.58	4.67	71	195	2	2	5.93	2	61.6	1.26	115	2	0.13	11.4	#NULL!	#NULL!	#NULL!	#NULL!	38	23
1	217	2021-07-21 08:28:51	1	1	20.1951	67	1	male	1	1.62	53	No	Married	1	#NULL!	0	Digestive System	0	0	1	1	0	0	0	1	69	2	28	58.9	6.29	4.5	71.4	125	2	2	3.91	1	37.8	1.13	114	2	0.12	10.2	#NULL!	#NULL!	#NULL!	#NULL!	47.1	77
1	244	2021-07-21 08:43:47	2	1	18.0737	74	2	female	2	1.45	38	No	Married	1	#NULL!	0	Reproductive System	4	0	0	0	0	0	0	0	77	2	37	205.5	24.75	1.11	49.9	86	1	1	1746.36	2	27.6	0.96	90	1	0.09	9.6	4.88	1.16	1.32	0	4.1	22
1	213	2021-07-21 09:46:42	2	1	20.3125	82	4	male	1	1.6	52	No	Other	3	#NULL!	0	Digestive System	0	0	1	0	0	0	0	0	64	1	38	196.6	4.42	3.47	78.5	141	2	2	4.45	2	42.4	0.6	115	2	0.11	9.8	3.26	0.78	1.08	1	17.2	70
1	220	2021-07-21 10:06:26	1	1	20.4082	75	2	female	2	1.4	40	No	Married	1	#NULL!	0	Digestive System	0	1	0	0	0	0	0	0	62	1	35	177.9	2.9	1.4	48.1	97	1	1	3.5	1	31.6	1.29	102	2	0.09	9.2	3.79	1.42	1.1	1	12.1	10
1	229	2021-07-21 10:11:04	1	1	#NULL!	90	5	male	1	1.65	#NULL!	Yes	Widowed	0	#NULL!	0	Respiratory System	0	0	1	0	0	0	0	0	53	1	27	94.3	25.74	7.54	78.7	84	1	2	2.64	1	26	1.08	304	3	0.29	9.7	2.9	0.52	0.86	1	4.2	16
1	148	2021-07-21 10:21:14	1	1	19.1001	66	1	male	1	1.65	52	No	Married	1	#NULL!	0	Respiratory System	4	0	1	0	0	0	0	0	67	1	41	#NULL!	5.86	3.96	67.6	164	2	1	5.42	2	49.8	1.55	180	2	0.17	9.3	3.89	0.77	1.3	0	22.5	18
1	195	2021-07-21 16:23:11	2	0	24.1588	68	1	male	1	1.69	69	No	Married	1	#NULL!	0	Exercise system	0	0	0	0	0	0	0	0	66	1	39	#NULL!	5.75	3.74	64.9	161	2	1	5.22	2	49.6	1.3	150	2	0.16	10.8	5.22	0.96	1.53	#NULL!	8.6	24
1	267	2021-07-22 09:31:19	1	0	20.9321	67	1	female	2	1.53	49	No	Married	1	#NULL!	0	Digestive System	0	1	0	0	0	0	0	0	75	2	39	#NULL!	3.34	1.68	50.4	139	2	1	4.19	2	44.2	0.99	96	1	0.1	9.8	#NULL!	#NULL!	#NULL!	#NULL!	10.8	23
1	180	2021-07-22 09:37:07	1	0	20.5457	72	2	female	2	1.56	50	No	Widowed	0	#NULL!	0	Respiratory System	0	1	0	0	0	0	0	0	66	1	37	#NULL!	5.81	4.11	70.8	149	2	2	4.82	2	45.2	1.17	414	3	0.39	9.3	4.66	0.83	1.38	0	10.9	15
1	27	2021-07-22 14:17:09	1	0	24	66	1	male	1	1.5	54	No	Married	1	#NULL!	0	Respiratory System	4	0	0	0	0	0	0	0	64	1	32	#NULL!	6.58	4.1	62.2	123	2	1	3.73	1	38.2	1.96	215	2	0.18	8.3	4.72	1.32	1.1	1	5.3	13
1	251	2021-07-23 09:23:25	1	0	27.5482	67	1	male	1	1.65	75	No	Married	1	#NULL!	0	Digestive System	0	1	0	0	0	0	0	0	62	1	41	#NULL!	11.88	1.76	48.3	134	2	1	4.3	2	38.6	1.34	109	2	0.1	9.3	#NULL!	#NULL!	#NULL!	#NULL!	21.9	25
1	252	2021-07-23 09:30:22	1	0	21.7784	75	2	male	1	1.56	53	No	Married	1	#NULL!	0	Digestive System	4	1	1	0	0	0	0	0	64	1	37	149.9	2.93	1.35	46.2	103	1	1	3.83	1	32.9	0.81	175	2	0.17	9.5	3.12	0.57	1.02	1	6.1	17
1	51	2021-07-23 10:04:59	2	0	21.0962	69	1	female	2	1.57	52	No	Married	1	#NULL!	0	Respiratory System	0	0	0	0	0	1	0	0	70	2	43	178.4	6.86	3.85	56	153	2	1	5.19	2	46.1	2.57	236	2	0.22	9.4	5.69	1.65	1.21	#NULL!	11.6	12
1	30	2021-07-23 10:36:46	1	0	26.7094	72	2	female	2	1.56	65	No	Other	3	#NULL!	0	Respiratory System	0	1	1	0	0	1	0	0	71	2	39	262.2	7.57	4.66	61.6	104	1	1	3.54	1	31	2.28	224	2	0.24	10.7	4.46	1.81	1.08	1	1.7	14
1	69	2021-07-23 11:57:29	1	1	18.8271	87	5	female	2	1.58	47	No	Married	1	#NULL!	0	Reproductive System	0	0	1	1	0	1	0	0	54	1	28	44.2	9.78	7.65	78.2	93	1	2	3.76	1	30.2	1.02	204	2	0.19	9.5	1.63	0.86	0.66	1	20.1	22
1	254	2021-07-23 12:02:44	2	1	18.3594	88	5	male	1	1.6	47	No	Married	1	#NULL!	0	Urinary System	0	0	0	0	0	1	0	0	56	1	23	90.8	6.55	4.52	69	81	1	2	2.72	1	28	1.27	369	3	0.33	8.9	3.22	0.62	0.86	1	5.2	12
1	157	2021-07-23 14:53:44	2	0	22.3214	82	4	male	1	1.68	63	No	Other	3	#NULL!	0	Respiratory System	0	1	0	0	0	0	0	1	52	1	29	#NULL!	1.98	4.69	80.6	68	1	2	1.32	1	22.1	0.76	346	3	0.31	8.9	#NULL!	#NULL!	#NULL!	#NULL!	6.3	40
1	277	2021-07-24 08:07:50	2	0	22.46	71	2	male	1	1.74	68	No	Married	1	#NULL!	0	Respiratory System	0	0	1	0	0	0	0	0	73	2	39	210	9.5	5.84	61.5	154	2	1	5.02	2	46.8	2.97	313	3	0.26	8.3	4.87	1.06	1.07	1	14.8	23
1	235	2021-07-24 08:10:30	1	1	#NULL!	85	4	male	1	#NULL!	#NULL!	Yes	Married	1	#NULL!	0	Respiratory System	0	0	1	0	0	1	0	1	40	1	14	#NULL!	6.09	5.01	82.1	95	1	2	3.33	1	30.3	0.46	322	3	0.37	11.4	#NULL!	#NULL!	#NULL!	#NULL!	1.7	15
1	211	2021-07-24 09:23:02	2	0	20.6575	72	2	male	1	1.69	59	No	Married	1	#NULL!	0	Respiratory System	0	0	0	1	0	0	0	0	62	1	38	#NULL!	4.71	2.58	54.7	148	2	1	4.87	2	45.4	1.43	74	1	0.1	13	#NULL!	#NULL!	#NULL!	#NULL!	16.9	72
1	163	2021-07-24 10:17:09	1	1	20.1956	66	1	male	1	1.68	57	No	Married	1	#NULL!	0	Respiratory System	0	0	0	0	0	0	0	0	73	2	44	219.5	6.1	4.31	70.6	159	2	2	5.03	2	48.1	1.26	131	2	0.18	13.9	4.38	0.6	1.45	0	14.6	24
1	223	2021-07-24 10:28:29	2	0	21.4844	68	1	female	2	1.6	55	No	Married	1	#NULL!	0	Reproductive system	0	1	0	0	0	0	0	0	75	2	43	223	4.64	2.44	52.5	142	2	1	4.56	2	44.4	1.89	219	2	0.19	8.4	5.61	1.65	1.23	#NULL!	5.3	21
1	296	2021-07-24 11:21:11	2	1	18.7305	86	5	male	1	1.55	45	No	Married	1	#NULL!	0	Respiratory system	0	0	0	0	0	0	0	1	83	2	35	160	1.49	0.95	63.7	56	1	2	1.65	1	17.7	0.27	331	3	0.32	9.5	2.92	0.55	1.24	0	7.6	11
1	227	2021-07-24 15:24:20	2	1	19.5312	71	2	male	1	1.6	50	No	Married	1	#NULL!	0	Respiratory System	4	0	0	0	0	0	0	0	74	2	38	#NULL!	3.51	2.1	59.9	133	2	1	4.07	2	41.3	0.96	289	2	0.31	10.8	#NULL!	#NULL!	#NULL!	#NULL!	6.7	75
1	326	2021-07-25 08:58:16	2	1	18.2899	82	4	female	2	1.62	48	No	Married	1	#NULL!	0	Digestive System	4	0	1	0	1	0	0	0	75	2	40	#NULL!	6.47	4.51	69.6	141	2	2	4.59	2	43.4	1.36	217	2	0.22	10.1	#NULL!	#NULL!	#NULL!	#NULL!	23.4	17
1	273	2021-07-25 09:10:51	2	0	28.7201	78	3	female	2	1.55	69	No	Married	1	#NULL!	0	Blood System	4	0	1	0	0	0	0	0	65	1	38	#NULL!	4.9	3.06	62.7	114	1	1	3.58	1	36.4	1.05	157	2	0.18	11.3	#NULL!	#NULL!	#NULL!	#NULL!	5.2	43
1	232	2021-07-25 11:00:01	1	1	21.0938	73	2	male	1	1.6	54	No	Married	1	#NULL!	0	Digestive System	0	0	1	1	0	0	0	0	66	1	29	136.8	4.7	3.67	78.2	108	1	2	3.21	1	32	0.57	102	2	0.11	10.9	#NULL!	#NULL!	#NULL!	#NULL!	170.9	62
1	239	2021-07-25 15:23:09	1	0	22.8928	68	1	female	2	1.55	55	No	Married	1	#NULL!	0	Respiratory System	0	0	0	0	0	0	0	0	64	1	41	#NULL!	4.73	2.48	52.6	153	2	1	4.51	2	45.8	1.91	213	2	0.19	8.8	3.46	2.86	1	1	16.4	19
1	191	2021-07-26 08:32:16	1	1	19.5918	71	2	male	1	1.75	60	No	Married	1	#NULL!	0	Respiratory System	0	0	1	1	0	0	0	1	51	1	22	65.8	8.1	6.79	83.8	106	1	2	3.65	1	33.2	0.77	204	2	0.17	8.4	6.2	1.19	0.73	#NULL!	52.2	33
1	175	2021-07-26 10:15:01	2	0	20.5191	75	2	male	1	1.71	60	No	Married	1	#NULL!	0	Respiratory System	4	0	0	0	0	0	0	0	65	1	35	#NULL!	0.99	2.87	56.4	139	2	1	4.3	2	43	1.41	212	2	0.21	10	4.43	1.15	1.03	1	20.2	19
1	237	2021-07-26 14:13:21	1	0	23.8751	78	3	male	1	1.65	65	No	Married	1	#NULL!	0	Respiratory System	0	1	0	0	0	0	0	1	75	2	35	#NULL!	6.05	2.97	49	139	2	1	4.95	2	43.2	2.07	155	2	0.13	8.5	#NULL!	#NULL!	#NULL!	#NULL!	15	19
1	282	2021-07-26 16:01:20	1	1	20.202	80	3	male	1	1.65	55	No	Widowed	0	#NULL!	0	Other	4	0	0	0	0	0	0	0	58	1	28	#NULL!	5.26	4.27	81.4	93	1	2	3.24	1	30.4	0.37	204	2	0.2	9.7	4.87	2.97	0.57	1	5.7	14
1	320	2021-07-27 09:41:24	2	1	20	73	2	female	2	1.5	45	No	Married	1	#NULL!	0	Digestive System	0	1	0	0	0	0	0	0	72	2	38	#NULL!	5.17	2.82	54.5	111	1	1	4.23	2	35.4	1.92	221	2	0.29	13.1	#NULL!	#NULL!	#NULL!	#NULL!	9.4	14
1	293	2021-07-27 09:42:22	2	0	22.2222	69	1	female	2	1.5	50	No	Married	1	#NULL!	0	Respiratory System	0	0	0	0	0	0	0	0	78	2	46	277	4.11	2.62	63.9	130	2	1	4.53	2	41.1	1.09	120	2	0.16	13	3.75	2.08	1.04	1	8.2	29
1	283	2021-07-27 11:37:23	2	1	18.7783	65	1	male	1	1.68	53	No	Married	1	#NULL!	0	Digestive System	4	1	0	0	0	0	0	0	72	2	40	220.1	0	2.92	63.9	142	2	1	0	2	43	1.04	106	2	0.13	12.2	3.85	1.67	0.92	1	12.9	22
1	307	2021-07-27 11:56:41	2	0	23.7387	67	1	male	1	1.68	67	No	Married	1	#NULL!	0	Respiratory System	4	0	0	0	0	0	0	0	62	1	35	#NULL!	10.89	2.44	55	92	1	1	0	1	29.6	1.23	62	1	0.05	9.1	#NULL!	#NULL!	#NULL!	#NULL!	3.1	14
1	143	2021-07-27 14:18:46	1	0	24.539	66	1	male	1	1.64	66	No	Married	1	#NULL!	0	Respiratory System	0	0	1	1	1	0	0	0	64	1	35	#NULL!	7.47	4.6	61.7	159	2	1	5.01	2	48.5	2.19	206	2	0.19	9	3.09	0.73	1.18	0	14.1	12
1	290	2021-07-28 08:33:01	1	1	20.4444	78	3	female	2	1.5	46	No	Married	1	#NULL!	0	Blood System	4	0	1	0	0	0	0	0	64	1	39	272	4.69	3.24	69	127	2	2	4.29	2	39.8	0.51	179	2	0.23	12.7	#NULL!	#NULL!	#NULL!	#NULL!	7.4	19
1	301	2021-07-28 09:09:43	2	0	23.9796	81	4	female	2	1.4	47	No	Widowed	0	#NULL!	0	Reproductive System	0	0	1	0	0	0	0	0	76	2	44	#NULL!	6.54	3.49	53.3	154	2	1	5.08	2	48.1	2.55	189	2	0.24	12.8	6.1	1.91	1	#NULL!	15.1	29
1	260	2021-07-28 09:34:11	1	0	22.4766	68	1	female	2	1.55	54	No	Widowed	3	#NULL!	0	Respiratory System	0	1	0	0	0	0	0	0	74	2	44	#NULL!	64.35	8.08	66.5	148	2	1	3.96	1	45.2	3.36	272	2	0.24	9	4.04	2.99	0.92	1	21.3	34
1	332	2021-07-28 10:09:14	1	0	23.6614	77	3	male	1	1.72	70	No	Married	1	#NULL!	0	Digestive System	4	0	0	1	0	0	0	0	69	2	40	188	4.65	1.88	40.2	117	1	1	3.93	1	35.4	1.86	145	2	0.15	10.3	#NULL!	#NULL!	#NULL!	#NULL!	12	30
1	216	2021-07-28 10:16:20	1	0	24.1672	85	4	male	1	1.64	65	No	Married	1	#NULL!	0	Reproductive System	4	0	0	0	0	1	0	0	68	1	32	#NULL!	7.09	4.41	62.1	101	1	2	3.85	1	32.7	0.95	463	3	0.39	8.5	#NULL!	#NULL!	#NULL!	#NULL!	2.3	11
1	347	2021-07-28 10:38:23	1	1	16.9796	68	1	male	1	1.75	52	No	Married	1	#NULL!	0	Respiratory System	4	0	0	0	0	0	0	0	67	1	37	172	3.41	1.61	47.2	114	1	1	3.52	1	35	1.14	365	3	0.32	8.9	3.72	0.72	1.16	0	6.8	13
1	288	2021-07-28 10:49:25	2	0	25.7778	65	1	female	2	1.5	58	No	Married	1	#NULL!	0	Reproductive System	0	0	0	0	0	0	0	0	75	2	42	252	5.07	3.46	68.2	147	2	1	4.85	2	44.7	1.14	136	2	0.19	14.2	3.73	2.7	1.12	1	8.8	49
1	343	2021-07-28 12:33:37	1	0	20.8117	77	3	female	2	1.55	50	No	Widowed	0	#NULL!	0	Digestive System	0	1	1	0	0	0	0	0	64	1	29	#NULL!	4.88	2.69	54.9	118	1	1	3.9	1	36.8	1.82	295	2	0.29	9.9	#NULL!	#NULL!	#NULL!	#NULL!	5	12
1	365	2021-07-29 08:43:04	1	0	24.5675	69	1	male	1	1.7	71	No	Married	1	#NULL!	0	Digestive System	0	0	1	0	0	0	0	0	77	2	46	#NULL!	4.21	2.26	53.7	118	1	1	3.66	1	34.6	1.57	226	2	0.17	7.3	#NULL!	#NULL!	#NULL!	#NULL!	6.7	13
1	358	2021-07-29 08:43:17	1	0	20.8307	79	3	male	1	1.78	66	No	Widowed	1	#NULL!	0	Respiratory System	4	0	0	0	0	0	0	0	63	1	31	129	7.42	4.63	62.5	135	2	1	4.27	2	42.4	1.53	200	2	0.2	10.2	3.04	1.64	0.74	1	5.6	12
1	312	2021-07-29 09:26:22	1	1	19.1327	84	4	male	1	1.68	54	No	Widowed	0	#NULL!	0	Respiratory System	0	0	0	0	0	0	0	0	59	1	31	#NULL!	4.95	4.6	77	130	2	2	40.92	2	37	0.75	203	2	0.23	11.2	4.11	2.87	0.68	1	8	24
1	164	2021-07-29 09:39:31	2	0	23.8751	74	2	male	1	1.65	65	No	Married	1	#NULL!	0	Digestive System	4	1	1	0	0	0	0	0	73	2	40	#NULL!	0	3.45	64.8	139	2	1	6.6	2	43.4	1.25	146	2	0.15	10	#NULL!	#NULL!	#NULL!	#NULL!	14.6	16
1	292	2021-07-29 09:52:32	1	0	23.5556	68	1	female	2	1.5	53	No	Married	1	#NULL!	0	Respiratory System	0	0	0	0	0	0	0	0	74	2	43	#NULL!	3.94	2.36	59.8	143	2	1	4.56	2	42.8	1.39	111	2	0.13	11.9	6.3	2.61	1.44	#NULL!	10.7	27
1	276	2021-07-29 10:03:13	1	1	15.4315	69	1	female	2	1.61	40	No	Other	3	#NULL!	0	Digestive System	0	0	0	0	0	0	0	0	59	1	33	#NULL!	3.28	1.48	45.1	104	1	1	3.25	1	33	1.27	183	2	0.14	7.6	4.51	0.58	1.16	1	7.8	16
1	230	2021-07-29 15:40:19	2	0	22.0317	77	3	female	2	1.58	55	No	Married	1	#NULL!	0	Digestive System	0	0	0	0	0	0	0	1	35	1	36	69	7.51	6.59	87.7	108	1	2	3.99	1	34.3	0.58	276	2	0.26	9.5	#NULL!	#NULL!	#NULL!	#NULL!	19.5	18
1	344	2021-07-30 08:25:11	2	0	25.2994	74	2	male	1	1.54	60	No	Married	1	#NULL!	0	Blood System	4	0	0	0	0	0	0	0	76	2	41	294	4.36	3.07	70.5	141	2	2	4.42	2	44	0.82	282	2	0.27	9.5	#NULL!	#NULL!	#NULL!	#NULL!	16.1	23
1	222	2021-07-30 09:11:46	1	0	25.3444	74	2	male	1	1.65	69	No	Married	1	#NULL!	0	Digestive System	0	0	1	0	0	0	0	0	71	2	41	409.5	6.04	3.68	60.9	146	2	1	4.7	2	44.4	1.94	215	2	0.2	9.1	3.41	1.63	0.84	1	11.2	18
1	109	2021-07-30 09:20:00	1	0	20.5151	72	2	male	1	1.78	65	No	Married	1	#NULL!	0	Respiratory System	4	0	0	1	0	0	0	0	85	2	33	107.6	1.98	9.22	73.7	122	2	2	2.64	1	37.8	2.01	230	2	0.23	10	3.23	1.02	0.55	1	11.9	14
1	329	2021-07-30 09:59:57	1	0	23.3056	68	1	female	2	1.45	49	No	Married	1	#NULL!	0	Digestive System	0	1	0	0	0	0	0	0	85	2	46	234	11.41	10	87.8	150	2	2	5.06	2	46.5	0.95	163	2	0.16	9.7	5.24	1.2	1.87	#NULL!	9.8	24
1	285	2021-07-30 11:11:24	1	0	22.2222	77	3	female	2	1.5	50	No	Married	1	#NULL!	0	Digestive System	0	1	0	0	0	0	0	0	73	2	28	90	5.83	4.34	74.6	118	1	2	4	1	36.4	1.07	158	2	0.17	10.5	3.45	1.85	0.36	1	125.6	51
1	327	2021-07-31 08:55:48	2	0	22.4913	77	3	male	1	1.7	65	No	Married	1	#NULL!	0	Respiratory System	4	0	0	1	0	1	0	0	70	2	31	90	10.97	8.69	79.1	128	2	2	3.97	1	39	1.37	212	2	0.21	9.7	4.01	1.22	0.75	1	13.3	35
1	258	2021-07-31 10:30:42	1	1	19.1406	71	2	female	2	1.6	49	No	Other	3	#NULL!	0	Respiratory System	0	0	0	0	1	0	0	0	73	2	40	#NULL!	5.5	2.88	52.4	130	2	1	4.14	2	41.3	2.2	86	1	0.13	15.2	#NULL!	#NULL!	#NULL!	#NULL!	24.1	16
1	310	2021-08-01 09:03:45	1	0	25.1111	77	3	female	2	1.5	56.5	No	Widowed	0	#NULL!	0	Respiratory System	0	0	1	0	1	0	0	0	54	1	31	#NULL!	3.89	2.12	54.4	86	1	1	3	1	27.5	0.85	220	2	0.2	9.2	#NULL!	#NULL!	#NULL!	#NULL!	16.3	17
1	303	2021-08-01 09:28:19	1	1	20.2449	73	2	male	1	1.75	62	No	Married	1	#NULL!	0	Digestive System	0	0	0	0	0	0	0	0	63	1	32	80.1	11.88	8.94	75.2	103	1	2	3.4	1	29.9	1.95	185	2	0.18	9.9	#NULL!	#NULL!	#NULL!	#NULL!	33.7	18
1	361	2021-08-02 08:48:05	1	0	22.5896	76	3	male	1	1.67	63	No	Married	1	#NULL!	0	Respiratory System	0	0	1	0	0	0	0	0	64	1	30	#NULL!	7.72	5.61	72.7	133	2	2	4.55	2	40	0.79	317	3	0.34	10.8	#NULL!	#NULL!	#NULL!	#NULL!	10.2	15
1	318	2021-08-02 09:29:32	2	1	#NULL!	88	5	male	1	#NULL!	#NULL!	Yes	Married	1	#NULL!	0	Reproductive System	4	0	0	0	0	0	0	0	75	2	44	#NULL!	4.68	2.87	61.4	146	2	1	4.3	2	44.7	1.35	166	2	0.16	9.8	#NULL!	#NULL!	#NULL!	#NULL!	8.1	14
1	380	2021-08-02 09:46:40	1	0	24.4561	87	5	female	2	1.54	58	No	Widowed	0	#NULL!	0	Digestive System	0	0	1	1	0	1	0	0	68	1	41	#NULL!	7.28	4.07	55.9	161	2	1	4.91	2	49.3	2.49	149	2	0.14	9.1	#NULL!	#NULL!	#NULL!	#NULL!	13.3	14
1	374	2021-08-02 10:13:53	1	0	22.0386	79	3	male	1	1.65	60	No	Married	1	#NULL!	0	Digestive System	0	1	1	0	0	0	0	0	62	1	35	183	6.59	4	60.7	113	1	1	3.37	1	33.7	2.11	208	2	0.2	9.6	3.93	1.03	1.11	1	7.8	21
1	366	2021-08-02 10:15:25	2	1	19.563	71	2	female	2	1.55	47	No	Widowed	0	#NULL!	0	Digestive System	4	1	0	0	0	0	0	0	81	2	45	224	3.61	2.49	68.7	137	2	1	4.42	2	42.1	0.79	175	2	0.15	8.7	6.45	0.99	1.38	#NULL!	29.8	21
1	351	2021-08-02 14:56:12	2	1	16.937	74	2	male	1	1.63	45	No	Remarried	1	#NULL!	0	Respiratory System	0	0	0	0	0	0	0	0	64	1	34	#NULL!	10.85	8.7	80.1	143	2	2	4.39	2	43.4	1.34	288	2	0.26	9.1	4.27	0.72	1.36	0	11.4	15
1	284	2021-08-03 10:18:16	2	0	22.0386	70	1	male	1	1.65	60	No	Married	1	#NULL!	0	Respiratory System	4	0	0	0	0	0	0	0	75	2	48	300	3.74	1.95	52.1	145	2	1	4.7	2	43	1.35	272	2	0.28	10.3	#NULL!	#NULL!	#NULL!	#NULL!	5.5	92
1	314	2021-08-03 10:29:14	2	1	20.2449	78	3	male	1	1.75	62	No	Other	3	#NULL!	0	Respiratory System	0	0	0	0	0	0	0	0	63	1	39	#NULL!	5.45	3.42	62.7	159	2	1	4.93	2	48.4	1.65	176	2	0.16	8.9	5.18	0.98	1.09	1	11.4	13
1	325	2021-08-04 08:29:45	2	0	22.2222	70	1	female	2	1.5	50	No	Married	1	#NULL!	0	Respiratory System	0	0	1	0	0	0	0	0	64	1	40	#NULL!	6.19	3.87	62.6	136	2	1	4.31	2	41.4	1.85	305	3	0.24	7.9	4.61	2.22	0.93	1	10.7	18
1	264	2021-08-04 10:24:33	2	1	20.5693	83	4	male	1	1.65	56	No	Married	1	#NULL!	0	Digestive System	0	0	0	0	0	0	0	0	61	1	32	#NULL!	4.08	2.63	64.4	131	2	1	4.13	2	39.5	0.88	180	2	0.18	10.2	5.37	0.63	1.48	#NULL!	5.7	17
1	339	2021-08-05 10:30:28	2	0	20.9573	67	1	male	1	1.72	62	No	Married	1	#NULL!	0	Respiratory System	4	0	0	0	0	0	0	0	65	1	33	#NULL!	7.81	6.24	79.9	115	1	2	4.15	2	36.7	0.87	222	2	0.24	10.7	4.12	1.29	1	1	15.5	42
1	323	2021-08-06 10:02:45	1	1	19.9481	71	2	male	1	1.63	53	No	Married	1	#NULL!	0	Digestive System	0	0	0	0	0	0	0	1	69	2	37	119	4.56	2.18	47.9	118	1	1	4.21	2	37	1.44	46	1	0.05	11.4	3.02	0.96	1.01	1	23.6	28
1	367	2021-08-06 10:10:23	2	0	28.0404	78	3	female	2	1.58	70	No	Widowed	0	#NULL!	0	Digestive System	0	0	0	0	0	0	0	0	72	2	41	215	4.62	1.93	41.8	133	2	1	4.14	2	41.1	2.25	197	2	0.2	10.3	5.21	3.06	0.97	#NULL!	10.9	20
1	391	2021-08-06 10:16:00	1	1	20.0796	70	1	male	1	1.67	56	No	Widowed	3	#NULL!	0	Digestive System	4	0	0	1	0	0	0	0	75	2	33	115	10.35	7.65	73.9	89	1	2	4.29	2	28.4	1.16	304	3	0.27	8.7	#NULL!	#NULL!	#NULL!	#NULL!	9.7	18
1	384	2021-08-06 10:44:00	2	0	25.9107	80	3	male	1	1.62	68	No	Married	1	#NULL!	0	Respiratory System	0	0	1	0	0	0	0	0	69	2	43	#NULL!	5.37	3.21	59.8	150	2	1	4.79	2	44.7	1.66	169	2	0.16	9.2	5.19	0.62	1.42	1	12.6	25
1	402	2021-08-06 11:16:45	1	1	17.301	78	3	male	1	1.7	50	No	Married	1	#NULL!	1	Respiratory System	0	0	0	0	0	0	0	0	67	1	30	#NULL!	14.19	12.73	89.7	80	1	2	3.78	1	28	0.75	299	2	0.27	9	#NULL!	#NULL!	#NULL!	#NULL!	19	12
1	375	2021-08-06 11:44:10	2	0	20.5761	66	1	female	2	1.62	54	No	Married	1	#NULL!	0	Respiratory System	0	0	1	0	0	0	0	0	64	1	40	#NULL!	4.84	2.81	58.1	138	2	1	4.59	2	42.1	1.7	133	2	0.18	13.7	6.72	3.08	1.06	#NULL!	23.7	26
1	317	2021-08-06 14:40:55	1	1	19.1327	87	5	male	1	1.68	54	No	Married	1	#NULL!	0	Respiratory System	0	0	1	0	0	0	0	0	65	1	39	#NULL!	5.31	2.7	50.9	152	2	1	4.43	2	46.7	2.06	114	2	0.15	13.4	5.04	0.75	1.55	0	17.7	13
1	426	2021-08-07 08:36:01	2	0	24.8777	74	2	male	1	1.54	59	No	Married	1	#NULL!	0	Blood System	4	0	0	0	0	0	0	0	67	1	37	#NULL!	3.09	1.97	63.6	137	2	1	4.3	2	42.5	0.72	168	2	0.16	9.5	#NULL!	#NULL!	#NULL!	#NULL!	16.5	24
1	353	2021-08-07 09:21:26	1	0	23.4375	86	5	male	1	1.6	60	No	Married	1	#NULL!	0	Digestive System	0	0	0	0	0	0	0	0	66	1	34	158	0.99	5.22	67.7	126	2	2	1.32	1	39.7	1.45	178	2	0.19	10.7	5.1	1.01	1.52	0	49.1	155
1	430	2021-08-07 09:27:52	1	1	16.5607	85	4	male	1	1.63	44	No	Married	1	#NULL!	0	Digestive System	0	0	0	0	0	0	0	0	56	1	27	83	3.96	#NULL!	#NULL!	#NULL!	1	#NULL!	0	1	#NULL!	#NULL!	#NULL!	1	#NULL!	#NULL!	2.34	0.98	0.6	1	14.6	13
1	410	2021-08-07 09:58:27	2	1	19.5717	67	1	male	1	1.63	52	No	Married	1	#NULL!	0	Respiratory System	4	1	0	0	0	0	0	0	61	1	36	#NULL!	0.99	2.21	52.7	114	1	1	0	1	34.5	1.25	181	2	0.18	9.9	#NULL!	#NULL!	#NULL!	#NULL!	13	16
1	393	2021-08-07 10:26:00	2	1	16	77	3	male	1	1.75	49	No	Married	1	#NULL!	0	Respiratory System	4	0	0	0	0	1	0	1	68	1	23	#NULL!	7.06	5.37	76.1	121	2	2	3.79	1	36.6	1.17	134	2	0.12	9.3	3.09	1.07	0.61	1	23.3	47
1	200	2021-08-07 18:26:38	2	0	27.9421	68	1	female	2	1.56	68	No	Other	3	#NULL!	0	Digestive System	0	1	0	0	0	0	0	0	69	2	44	200	4	2.48	62	148	2	1	4.66	2	45.8	1.19	175	2	0.15	8.6	4.89	1	1.41	0	9	89
1	424	2021-08-08 08:51:57	1	0	26.2222	65	1	female	2	1.5	59	No	Married	1	#NULL!	0	Digestive System	0	0	0	0	0	0	0	0	67	1	33	104	3.96	3.76	71.5	114	1	2	1.32	1	35	0.98	160	2	0.13	8	3.83	1	0.72	1	22.4	81
1	300	2021-08-08 09:09:27	1	1	13.8408	65	1	male	1	1.7	40	No	Married	1	#NULL!	0	Digestive System	4	0	0	0	0	0	0	0	84	2	45	251	4.48	1.91	42.7	149	2	1	4.7	2	46.3	2.21	304	3	0.27	8.7	5.25	1.74	1.48	#NULL!	9.1	37
1	280	2021-08-08 09:35:14	2	0	20.8117	74	2	female	2	1.55	50	No	Widowed	0	#NULL!	0	Respiratory System	0	0	1	1	0	0	0	0	81	2	41	#NULL!	5.33	3.32	62.4	138	2	1	4.91	2	43.6	1.6	191	2	0.18	9.2	4.66	0.98	1.04	1	8.4	16
1	398	2021-08-10 10:09:00	1	1	20.0692	79	3	male	1	1.7	58	No	Married	1	#NULL!	0	Respiratory System	0	1	0	0	0	0	0	0	73	2	46	#NULL!	2.97	4.47	62	162	2	1	1.32	1	49.4	2.42	194	2	0.18	9.3	5.69	1.8	1.59	#NULL!	17.1	20
1	360	2021-08-10 10:33:25	2	1	22.0703	77	3	male	1	1.6	56.5	No	Married	1	#NULL!	0	Digestive System	4	0	0	0	0	0	0	1	64	1	29	93	17.55	15.88	90.5	126	2	2	4.23	2	38.7	0.98	242	2	0.22	9.2	2.03	0.66	0.61	1	34	25
1	274	2021-08-10 11:16:58	1	0	21.1553	68	1	male	1	1.67	59	No	Married	1	#NULL!	0	Respiratory System	0	0	0	0	0	0	0	0	64	1	40	#NULL!	4.76	2.09	43.8	138	2	1	4.28	2	41.9	2.02	205	2	0.19	9.3	5.8	0.89	1.88	#NULL!	14.6	31
1	479	2021-08-10 14:52:21	1	0	20.6905	73	2	female	2	1.57	51	No	Married	1	#NULL!	0	Reproductive System	0	0	1	1	0	0	0	0	76	2	46	#NULL!	6.73	5.33	79.3	134	2	2	4.64	2	40.8	1.13	186	2	0.16	8.6	3.35	1.2	1.2	0	13.8	19
1	407	2021-08-11 08:15:54	1	0	24.8358	72	2	female	2	1.58	62	No	Married	1	#NULL!	0	Respiratory System	4	1	1	0	0	0	0	0	72	2	37	#NULL!	7.59	5.05	66.6	106	1	1	3.65	1	32.8	1.84	242	2	0.24	9.9	4.36	1.15	1.01	1	4	17
1	338	2021-08-11 10:58:45	1	0	22.0386	85	4	male	1	1.65	60	No	Married	1	#NULL!	0	Digestive System	0	1	0	0	0	0	0	1	61	1	29	#NULL!	7.05	5.53	78.3	142	2	2	4.59	2	44.4	0.97	168	2	0.19	11.4	3.74	0.94	0.87	1	12.7	15
1	490	2021-08-12 08:37:54	1	0	24	69	1	female	2	1.5	54	No	Married	1	#NULL!	0	Reproductive System	4	0	1	0	1	0	0	0	69	2	42	#NULL!	9.01	5.81	64.3	125	2	1	4.25	2	38	2.56	283	2	0.28	9.9	3.85	2.91	1.11	1	6.2	24
1	438	2021-08-12 09:05:11	1	1	18.1449	79	3	male	1	1.66	50	No	Married	1	#NULL!	0	Reproductive System	0	0	0	0	0	0	0	0	70	2	43	200	4.81	3.08	64.2	138	2	1	5.93	2	44.4	1.29	118	2	0.12	10	4.22	0.8	1.01	1	10.7	18
1	266	2021-08-12 09:39:50	2	1	20.5049	73	2	male	1	1.53	48	No	Married	1	#NULL!	0	Digestive system	0	0	0	0	0	0	0	0	58	1	35	158.4	5.97	3.84	64.4	123	2	1	3.44	1	37	1.5	253	2	0.25	9.8	#NULL!	#NULL!	#NULL!	#NULL!	5.1	13
1	450	2021-08-12 11:06:11	1	1	17.3134	67	1	female	2	1.63	46	No	Married	1	#NULL!	0	Reproductive System	0	0	0	0	0	1	0	0	60	1	40	235	5.6	3.31	59	140	2	1	4.62	2	44.2	1.94	157	2	0.17	11	6.07	1.32	1.3	#NULL!	8.2	24
1	504	2021-08-12 14:05:42	2	0	26.6667	76	3	male	1	1.5	60	No	Married	1	#NULL!	0	Respiratory System	4	0	1	0	1	0	0	0	69	2	40	#NULL!	7.13	4.86	68.1	166	2	1	5.45	2	51.5	1.74	78	1	0.11	13.6	3.04	0.93	1.12	1	23.2	26
1	497	2021-08-13 08:34:42	1	0	24.4561	74	2	male	1	1.54	58	No	Married	1	#NULL!	0	Blood System	4	0	0	0	0	0	0	0	64	1	38	#NULL!	0.99	3.96	65.5	132	2	1	0	2	41.9	1.29	164	2	0.17	10.3	#NULL!	#NULL!	#NULL!	#NULL!	13.5	21
1	331	2021-08-13 09:57:08	1	0	23.3091	74	2	female	2	1.55	56	No	Widowed	0	#NULL!	0	Digestive System	4	1	0	1	0	0	0	1	62	1	28	#NULL!	9.81	7.74	79	98	1	2	3.51	1	30.9	1.22	383	3	0.29	7.6	3.53	1.3	0.89	1	7	18
1	449	2021-08-13 09:59:06	1	1	18.75	65	1	female	2	1.6	48	No	Married	1	#NULL!	0	Digestive System	0	0	0	0	0	0	0	0	80	2	45	207	1.98	2.11	55.3	144	2	1	2.64	1	44.6	1.42	161	2	0.15	9.4	4.97	0.97	1.84	0	16.3	37
1	348	2021-08-13 10:08:50	2	1	20.3125	75	2	male	1	1.6	52	No	Widowed	0	#NULL!	0	Digestive System	4	1	0	0	0	0	0	0	70	2	41	189	12.22	11.11	91	117	1	2	4.36	2	37.5	0.81	150	2	0.16	10.4	#NULL!	#NULL!	#NULL!	#NULL!	10.1	18
1	441	2021-08-13 10:42:56	1	1	18.7328	65	1	male	1	1.65	51	No	Married	1	#NULL!	0	Respiratory System	0	1	0	0	0	0	0	1	59	1	28	126	13.47	12.1	89.9	107	1	2	3.97	1	33	0.36	343	3	0.37	10.8	3.72	0.87	0.94	1	3.3	87
1	462	2021-08-14 08:54:31	2	0	27.1809	67	1	male	1	1.65	74	No	Married	1	#NULL!	0	Digestive System	0	1	0	0	0	0	0	0	64	1	41	#NULL!	4.18	1.74	41.8	142	2	1	3.55	1	41.1	1.77	108	2	0.11	9.7	#NULL!	#NULL!	#NULL!	#NULL!	19.2	30
1	471	2021-08-14 09:27:39	1	1	19.025	74	2	female	2	1.45	40	No	Married	1	#NULL!	0	Reproductive System	4	0	0	0	0	0	0	0	72	2	38	#NULL!	1.93	1.09	56.4	82	1	1	2.49	1	27	0.66	83	1	0.08	9.6	#NULL!	#NULL!	#NULL!	#NULL!	3.7	16
1	423	2021-08-14 09:44:10	2	0	21.4533	83	4	male	1	1.7	62	No	Married	1	#NULL!	0	Respiratory System	0	0	1	0	1	0	0	0	73	2	40	#NULL!	4.02	2.05	51.1	132	2	1	3.98	1	40.8	1.68	169	2	0.15	9.1	4.43	1.5	1.35	0	11.7	17
1	336	2021-08-14 10:01:34	2	1	17.8565	70	1	male	1	1.69	51	No	Married	1	#NULL!	0	Digestive System	4	0	0	0	0	0	0	0	72	2	32	114	7.25	5.67	78.1	98	1	2	2.86	1	29.7	0.94	267	2	0.23	8.5	5.52	2.47	0.17	#NULL!	326.3	41
1	460	2021-08-14 10:09:40	2	0	23.6244	70	1	male	1	1.62	62	No	Married	1	#NULL!	0	Respiratory System	4	0	0	0	0	0	0	1	63	1	27	#NULL!	7.16	5.68	79.3	98	1	2	3.1	1	31.3	0.71	345	3	0.29	8.3	2.85	1.47	0.64	1	9.6	50
1	434	2021-08-14 10:26:54	1	1	18.9555	65	1	male	1	1.68	53.5	No	Married	1	#NULL!	0	Digestive System	4	1	0	0	0	0	0	0	63	1	37	#NULL!	3.3	2.07	62.7	115	1	1	3.62	1	34	0.76	66	1	0.08	12.3	#NULL!	#NULL!	#NULL!	#NULL!	6.2	20
1	420	2021-08-15 09:31:48	2	1	17.8465	66	1	male	1	1.64	48	No	Married	1	#NULL!	0	Respiratory System	0	0	0	0	0	0	0	0	63	1	37	#NULL!	5.35	4.05	75.6	180	2	2	5.3	2	57.6	0.89	117	2	0.11	9.5	4.43	0.75	1.28	0	16.8	17
1	519	2021-08-15 10:00:29	2	0	25.7778	67	1	female	2	1.5	58	No	Widowed	0	#NULL!	0	Respiratory System	4	0	0	0	0	0	0	0	68	1	44	#NULL!	4.93	3.4	69.1	141	2	1	4.66	2	42.9	1.21	255	2	0.24	9.5	5.17	1.05	1.2	1	29.6	16
1	514	2021-08-15 14:10:56	1	1	19.0443	73	2	female	2	1.52	44	No	Married	1	#NULL!	0	Digestive System	0	1	0	0	0	0	0	0	68	1	36	#NULL!	1.98	2.11	52.8	108	1	1	0	1	33.3	1.52	151	2	0.19	12.3	#NULL!	#NULL!	#NULL!	#NULL!	9.2	14
1	506	2021-08-16 11:11:28	2	1	17.3589	85	4	male	1	1.78	55	No	Widowed	0	#NULL!	0	Respiratory System	4	0	1	0	0	0	0	1	61	1	30	#NULL!	8.26	6.95	84.2	128	2	2	4.61	2	40.7	0.78	118	2	0.11	9.5	3.07	0.71	0.73	1	12.6	14
1	440	2021-08-17 06:00:00	2	1	16.0156	67	1	male	1	1.6	41	No	Married	1	#NULL!	0	Digestive System	0	0	1	1	0	0	0	1	72	2	26	#NULL!	8.17	6.61	80.9	130	2	2	3.92	1	37	1.05	135	2	0.15	11.2	#NULL!	#NULL!	#NULL!	#NULL!	69.5	118
1	435	2021-08-17 08:46:15	2	1	16.1354	80	3	male	1	1.67	45	No	Married	1	#NULL!	0	Reproductive System	4	0	1	1	0	0	0	1	71	2	43	153	10.41	7.55	72.5	111	1	2	3.85	1	34	2.24	204	2	0.18	9.1	5.23	2.04	0.94	#NULL!	21.7	16
1	516	2021-08-17 09:11:10	2	1	18.7305	86	5	male	1	1.55	45	No	Married	1	#NULL!	0	Respiratory System	0	0	0	0	0	0	0	0	72	2	30	#NULL!	1.77	0.7	39.6	59	1	1	1.79	1	19	0.59	201	2	0.24	12.1	#NULL!	#NULL!	#NULL!	#NULL!	10.5	13
1	246	2021-08-17 09:26:26	2	1	20.7031	81	4	male	1	1.6	53	No	Widowed	1	#NULL!	0	Respiratory System	4	0	0	0	0	0	0	0	75	2	43	#NULL!	6.2	3.66	58.9	159	2	1	4.94	2	49	1.74	203	2	0.23	11.1	4.56	1.09	1.29	0	12.2	18
1	491	2021-08-17 09:49:34	1	1	16.6468	67	1	female	2	1.45	35	No	Widowed	0	#NULL!	0	Respiratory System	0	0	1	0	0	1	0	0	79	2	43	#NULL!	5.38	3.42	63.4	136	2	1	4.49	2	40.9	1.64	294	2	0.29	9.8	6.71	1.86	1.43	#NULL!	6.7	22
1	496	2021-08-17 09:52:13	2	0	21.875	69	1	male	1	1.6	56	No	Married	1	#NULL!	0	Respiratory System	0	1	1	1	0	0	0	0	63	1	37	#NULL!	5.99	3.39	56.5	138	2	1	4.23	2	41.3	1.98	168	2	0.19	11.1	#NULL!	#NULL!	#NULL!	#NULL!	12.1	15
1	437	2021-08-17 09:55:15	2	1	19.5312	71	2	male	1	1.6	50	No	Married	1	#NULL!	0	Respiratory System	4	0	0	0	0	0	0	0	72	2	39	#NULL!	3.14	1.91	61.1	122	2	1	3.84	1	38.3	0.9	137	2	0.14	10.3	#NULL!	#NULL!	#NULL!	#NULL!	10.3	20
1	433	2021-08-17 10:05:56	1	1	20.5693	73	2	male	1	1.65	56	No	Married	1	#NULL!	0	Digestive System	0	0	1	1	0	0	0	0	65	1	26	82	3.27	2.16	66	105	1	1	3.1	1	32	0.78	71	1	0.08	11.1	#NULL!	#NULL!	#NULL!	#NULL!	189.4	54
1	520	2021-08-17 10:39:58	2	0	30.6667	78	3	female	2	1.5	69	No	Married	1	#NULL!	0	Blood System	4	0	1	0	0	0	0	0	68	1	43	208	3.78	2.27	60	113	1	1	3.59	1	35.8	0.9	198	2	0.21	10.7	5.6	2.41	1.22	#NULL!	7.8	51
1	544	2021-08-18 09:28:41	1	0	27.5134	77	3	male	1	1.64	74	No	Married	1	#NULL!	0	Digestive System	4	0	0	1	0	0	0	0	67	1	39	179	5.29	1.81	34.1	110	1	1	3.67	1	33.8	2.51	116	2	0.11	9.8	#NULL!	#NULL!	#NULL!	#NULL!	11.8	29
1	503	2021-08-18 09:53:32	1	1	22.2222	87	5	female	2	1.5	50	No	Widowed	0	#NULL!	0	Digestive System	0	0	0	0	0	0	0	1	48	1	25	#NULL!	0.99	3.34	78.1	56	1	2	0	1	20.1	0.49	294	2	0.22	7.6	#NULL!	#NULL!	#NULL!	#NULL!	7.7	6
1	549	2021-08-18 11:03:16	2	1	15.605	68	1	male	1	1.79	50	No	Married	1	#NULL!	0	Respiratory System	4	0	0	0	0	0	0	0	72	2	39	#NULL!	8.38	5.67	67.8	132	2	2	4.3	2	41.4	1.46	365	3	0.33	8.9	4.37	0.85	1.04	1	10.5	11
1	387	2021-08-19 11:44:45	2	0	23.7118	65	1	male	1	1.63	63	No	Other	3	#NULL!	0	Respiratory System	0	1	1	1	0	0	0	0	74	2	40	#NULL!	1.98	1.74	39.9	157	2	1	0	2	47	2.08	247	2	0.24	9.6	4.31	1.65	1.5	0	15.2	18
1	400	2021-08-19 11:44:45	1	0	23.7118	65	1	male	1	1.63	63	No	Other	3	#NULL!	0	Respiratory System	0	1	1	1	0	0	0	0	74	2	40	#NULL!	1.98	1.74	39.9	157	2	1	0	2	47	2.08	247	2	0.24	9.6	4.31	1.65	1.5	0	15.2	18
1	571	2021-08-20 08:15:08	1	0	21.875	90	5	male	1	1.6	56	No	Married	1	#NULL!	0	Urinary System	0	0	1	0	0	0	0	0	62	1	31	138	8.09	5.49	67.8	134	2	2	4.41	2	40	1.59	278	2	0.28	10.2	#NULL!	#NULL!	#NULL!	#NULL!	8	11
1	574	2021-08-20 08:34:37	2	0	22.231	83	4	male	1	1.67	62	No	Married	1	#NULL!	0	Respiratory System	4	0	1	0	1	0	0	0	73	2	40	#NULL!	3.23	2.05	63.6	133	2	1	4.53	2	40.3	0.85	216	2	0.23	10.4	#NULL!	#NULL!	#NULL!	#NULL!	29.2	18
1	562	2021-08-20 08:44:51	2	1	17.9089	82	4	female	2	1.62	47	No	Widowed	0	#NULL!	0	Digestive System	4	0	1	0	1	0	0	0	70	2	40	#NULL!	6.81	4.51	66.3	137	2	1	4.4	2	40	1.59	210	2	0.21	10.2	#NULL!	#NULL!	#NULL!	#NULL!	18.7	24
1	565	2021-08-20 08:46:50	2	1	19.9792	80	3	female	2	1.55	48	No	Married	1	#NULL!	0	Digestive System	4	0	0	0	0	0	0	0	71	2	42	186	4.21	2.73	64.9	122	2	1	3.73	1	37	0.94	182	2	0.18	9.8	4.58	0.95	1.44	0	22.1	14
1	577	2021-08-20 10:20:14	2	0	22.4766	67	1	female	2	1.55	54	No	Widowed	0	#NULL!	0	Respiratory System	4	0	0	0	0	0	0	0	72	2	43	#NULL!	3.61	2.82	78.1	126	2	2	4.09	2	39	0.61	135	2	0.14	10.3	5.29	0.98	1.34	#NULL!	14.1	17
1	542	2021-08-20 10:21:49	1	0	21.4844	68	1	female	2	1.6	55	No	Married	1	#NULL!	0	Reproductive System	4	1	0	0	0	0	0	0	74	2	43	210	6.74	4.42	65.7	143	2	1	4.53	2	44.4	1.84	208	2	0.18	8.9	5.31	1.4	1.19	#NULL!	6.4	19
1	465	2021-08-21 08:37:31	2	1	24.974	84	4	female	2	1.55	60	No	Married	1	#NULL!	0	Digestive System	0	0	1	0	0	0	0	0	61	1	32	107	3.96	4.35	70.1	112	1	2	0	1	34	0.99	250	2	0.25	10.1	3.34	1.04	0.57	1	19.2	49
1	532	2021-08-21 09:44:33	1	0	22.4966	75	2	female	2	1.35	41	No	Married	1	#NULL!	0	Digestive System	0	1	0	0	0	0	0	0	51	1	31	139	5.84	3.25	55.7	101	1	1	3.71	1	32.9	2.31	108	2	0.1	9	3.62	1.46	0.9	1	13.6	13
1	560	2021-08-21 10:14:58	1	0	21.6713	74	2	male	1	1.65	59	No	Married	1	#NULL!	0	Respiratory System	4	0	1	1	0	0	0	0	71	2	39	#NULL!	6.16	3.96	64.3	115	1	1	3.65	1	35.3	1.53	151	2	0.15	10.2	4.29	2.61	0.97	1	19.9	30
1	543	2021-08-22 09:30:39	2	0	23.4375	79	3	male	1	1.6	60	No	Other	3	#NULL!	0	Digestive System	0	1	0	0	0	0	0	0	62	1	34	135	7.81	5.19	66.6	112	1	1	3.23	1	33.7	1.81	179	2	0.19	10.3	2.86	0.75	0.97	1	12.4	15
1	500	2021-08-22 10:17:05	1	0	24.6094	78	3	male	1	1.6	63	No	Other	3	#NULL!	0	Respiratory System	0	0	0	0	0	0	0	1	57	1	34	#NULL!	6.21	4.47	72.1	130	2	2	4.08	2	39.4	0.97	367	3	0.27	7.4	#NULL!	#NULL!	#NULL!	#NULL!	5.6	17
1	561	2021-08-22 11:28:39	1	1	19.5918	72	2	male	1	1.75	60	No	Married	1	#NULL!	0	Respiratory System	0	0	0	0	0	0	0	0	64	1	38	#NULL!	5.27	3.24	61.6	153	2	1	5.05	2	46.7	1.58	277	2	0.25	9.1	5.33	1.51	1.02	#NULL!	20.1	25
1	485	2021-08-23 09:19:47	2	0	20.9877	67	1	male	1	1.8	68	No	Other	3	#NULL!	0	Respiratory system	0	0	0	0	0	0	0	0	53	1	35	#NULL!	3.92	2.38	60.6	140	2	1	4.47	2	43.5	0.92	136	2	0.13	9.9	#NULL!	#NULL!	#NULL!	#NULL!	16	13
1	568	2021-08-23 17:36:34	1	1	17.8571	90	5	female	2	1.4	35	No	Married	1	#NULL!	0	Respiratory System	4	0	1	0	0	1	0	1	57	1	27	#NULL!	4.92	3.63	73.8	144	2	2	5.2	2	46	0.92	172	2	0.17	9.8	4.55	1.12	1.17	0	21.4	9
1	563	2021-08-24 08:14:31	2	1	26.8352	81	4	female	2	1.52	62	No	Widowed	0	#NULL!	0	Digestive System	0	0	1	1	0	1	0	0	72	2	33	114	115.83	#NULL!	#NULL!	#NULL!	1	#NULL!	0	1	#NULL!	#NULL!	#NULL!	1	#NULL!	#NULL!	#NULL!	#NULL!	#NULL!	#NULL!	13	15
1	508	2021-08-24 09:39:55	1	1	19.047	71	2	male	1	1.76	59	No	Married	1	#NULL!	0	Digestive System	0	0	0	0	0	0	0	0	69	2	37	86	8.91	6.87	77.2	124	2	2	3.88	1	37.1	1.17	275	2	0.22	8.1	#NULL!	#NULL!	#NULL!	#NULL!	13.1	60
1	551	2021-08-24 09:42:48	2	1	16.7969	80	3	male	1	1.6	43	No	Married	1	#NULL!	0	Urinary System	0	0	0	0	0	0	0	1	65	1	41	187	8.35	7.42	88.9	161	2	2	5.17	2	49.4	0.42	196	2	0.17	8.5	6.98	0.82	2.1	#NULL!	30.9	13
1	569	2021-08-24 10:36:31	2	0	26.1249	72	2	female	2	1.49	58	No	Married	1	#NULL!	0	Respiratory System	0	0	1	0	0	0	0	0	68	1	38	#NULL!	6.17	3.66	59.3	118	1	1	4.05	2	36.6	1.88	113	2	0.18	15.8	#NULL!	#NULL!	#NULL!	#NULL!	15.6	29
1	602	2021-08-24 11:23:43	1	0	24	66	1	male	1	1.5	54	No	Married	1	#NULL!	0	Respiratory System	4	0	0	0	0	0	0	0	61	1	34	#NULL!	6.68	4.27	63.9	111	1	1	3.48	1	35.4	1.65	236	2	0.2	8.4	5.23	1.29	1.14	#NULL!	4.2	15
1	458	2021-08-24 15:04:04	1	0	23.5294	66	1	male	1	1.7	68	No	Married	1	#NULL!	0	Respiratory System	0	0	1	0	0	0	0	0	64	1	37	#NULL!	5	2.38	47.6	142	2	1	4.25	2	43.4	2.06	180	2	0.15	8.1	4.4	0.7	1.51	0	15.9	17
1	580	2021-08-25 08:57:13	1	0	21.4573	78	3	female	2	1.48	47	No	Married	1	#NULL!	0	Hematologic System	4	0	1	0	0	0	0	0	66	1	41	#NULL!	4.95	2.02	59.3	128	2	1	1.32	1	39	0.75	126	2	0.17	13.8	#NULL!	#NULL!	#NULL!	#NULL!	6.6	22
1	535	2021-08-25 09:33:58	1	0	24.977	69	1	female	2	1.65	68	No	Other	3	#NULL!	0	Endocrine System	0	0	1	1	0	0	0	0	68	1	39	210	6.77	4.4	65.1	127	2	1	4.15	2	37	1.85	169	2	0.18	10.6	4.8	1.22	1.06	1	5.2	16
1	590	2021-08-25 09:55:10	1	0	402.367	79	3	male	1	0.65	170	No	Married	1	#NULL!	0	Reproductive System	0	1	1	0	0	1	0	0	63	1	34	#NULL!	8.78	6.02	68.5	109	1	1	3.39	1	34.6	1.98	142	2	0.14	9.7	#NULL!	#NULL!	#NULL!	#NULL!	17.5	41
1	553	2021-08-25 10:23:25	1	0	24.623	74	2	male	1	1.71	72	No	Married	1	#NULL!	0	Respiratory System	0	0	1	1	0	0	0	0	75	2	45	#NULL!	8.53	4.63	54.3	172	2	1	5.69	2	53.4	3.17	199	2	0.22	10.9	5.88	3.51	1.05	#NULL!	16.2	18
1	593	2021-08-26 09:22:00	1	1	19.563	71	2	female	2	1.55	47	No	Married	1	#NULL!	0	Digestive System	4	1	0	0	0	0	0	0	72	2	41	202	2.81	1.68	59.8	137	2	1	4.31	2	41.4	0.81	129	2	0.12	9.1	7.23	1.48	1.66	#NULL!	37.5	21
1	610	2021-08-26 11:39:25	2	0	21.6296	67	1	male	1	1.76	67	No	Married	1	#NULL!	0	Respiratory System	4	0	0	0	0	0	0	0	72	2	37	#NULL!	3.72	2.14	57.5	82	1	1	2.52	1	25.5	0.85	89	1	0.09	10.2	#NULL!	#NULL!	#NULL!	#NULL!	6.4	22
1	442	2021-08-27 09:28:56	1	0	23.8281	71	2	female	2	1.6	61	No	Married	1	#NULL!	0	Reproductive System	0	0	1	0	0	0	0	0	67	1	38	#NULL!	5.18	2.52	48.6	145	2	1	4.66	2	43.7	2.14	133	2	0.18	13.8	#NULL!	#NULL!	#NULL!	#NULL!	10	59
1	596	2021-08-27 09:44:01	1	0	25.3444	70	1	male	1	1.65	69	No	Married	1	#NULL!	0	Respiratory system	4	0	0	0	0	0	0	0	65	1	42	#NULL!	3.79	1.94	51.2	129	2	1	4.15	2	38	1.23	315	3	0.29	9.1	#NULL!	#NULL!	#NULL!	#NULL!	5.6	110
1	457	2021-08-27 09:51:29	1	0	24.0055	70	1	male	1	1.62	63	No	Married	1	#NULL!	0	Reproductive System	0	0	0	0	0	0	0	0	73	2	41	#NULL!	9.79	6.49	66.3	163	2	1	5.3	2	50.8	2.35	240	2	0.23	9.8	#NULL!	#NULL!	#NULL!	#NULL!	24.9	20
1	612	2021-08-27 09:53:48	1	0	22.8374	74	2	male	1	1.7	66	No	Married	1	#NULL!	0	Reproductive System	4	0	0	0	0	0	0	0	73	2	43	#NULL!	0.99	3.38	67.6	144	2	1	0	2	45	1.27	191	2	0.19	9.9	4.26	1.03	1.13	1	10.8	12
1	637	2021-08-27 10:06:43	1	1	19.1327	88	5	male	1	1.68	54	No	Married	1	#NULL!	0	Respiratory system	4	0	0	0	0	0	0	0	71	2	41	#NULL!	3.55	2	56.1	134	2	1	4.11	2	41.4	1.11	147	2	0.14	9.6	#NULL!	#NULL!	#NULL!	#NULL!	17.4	13
1	633	2021-08-27 10:43:17	2	0	22.2137	69	1	female	2	1.53	52	No	Married	1	#NULL!	0	Respiratory system	0	1	0	0	0	0	0	0	59	1	36	#NULL!	3.64	1.97	54.1	134	2	1	4.36	2	41.3	1.28	123	2	0.15	12.4	3.84	2.82	0.75	1	7.2	10
1	525	2021-08-27 10:44:08	1	1	18.2899	71	2	male	1	1.62	48	No	Married	1	#NULL!	0	Respiratory System	0	0	0	0	0	0	0	0	67	1	33	#NULL!	6.37	3.95	62.1	118	1	1	3.71	1	35.5	1.77	12	1	0.01	9.6	7.88	2.34	0.79	#NULL!	12.3	24
1	501	2021-08-28 10:43:51	2	0	23.3234	71	2	male	1	1.72	69	No	Married	1	#NULL!	0	Digestive System	0	0	1	1	0	0	0	0	68	1	40	224	0	6.59	58.6	148	2	1	0	2	45.2	3.48	239	2	0.22	9.3	3.8	1.06	1.33	0	13.5	24
1	576	2021-08-29 08:42:20	1	1	13.8408	66	1	male	1	1.7	40	No	Married	1	#NULL!	0	Digestive System	4	0	0	0	0	0	0	0	82	2	42	224	6.58	2.32	35.2	139	2	1	4.35	2	42.5	3.49	352	3	0.32	9.2	5.52	1.92	1.97	#NULL!	17	178
1	533	2021-08-29 09:46:11	2	1	17.6693	81	4	male	1	1.56	43	No	Married	1	#NULL!	0	Respiratory System	0	0	1	0	0	1	0	1	58	1	25	74	13	11.02	84.7	125	2	2	3.77	1	36.3	1.1	354	3	0.33	9.3	2.73	0.94	0.49	1	18.2	17
1	667	2021-08-29 14:46:24	2	1	19.1467	73	2	male	1	1.55	46	No	Married	1	#NULL!	0	Digestive System	0	1	0	0	0	0	0	0	59	1	36	202	4.99	2.42	48.5	112	1	1	3.33	1	33.8	2.11	258	2	0.22	8.6	3.66	1.26	0.68	1	3.5	28
1	605	2021-08-29 16:58:57	2	0	23.4375	88	5	male	1	1.6	60	No	Other	3	#NULL!	0	Respiratory System	4	0	1	0	1	0	0	1	65	1	33	149	12.69	10.9	95.9	123	2	2	4.39	2	37	0.27	338	3	0.39	11.4	4.94	0.58	1.1	1	11.3	10
1	616	2021-08-30 09:16:27	1	1	20.4467	78	3	male	1	1.61	53	No	Married	1	#NULL!	0	Other	0	0	0	0	0	0	0	0	65	1	28	#NULL!	5.82	4.28	73.7	66	1	2	2.91	1	21.5	1.02	288	2	0.24	8.3	#NULL!	#NULL!	#NULL!	#NULL!	5.6	19
1	630	2021-08-30 09:55:49	1	0	29.0533	71	2	male	1	1.68	82	No	Married	1	#NULL!	0	Respiratory System	0	0	1	0	0	0	0	0	71	2	40	234	5.53	2.69	48.7	170	2	1	5.52	2	53	2.04	170	2	0.15	9	3.14	1.92	0.71	1	26.1	18
1	394	2021-08-30 10:01:45	1	0	23.8751	74	2	male	1	1.65	65	No	Married	1	#NULL!	0	Digestive System	4	1	1	0	0	0	0	0	75	2	42	187	5.27	3.53	67	151	2	1	5.15	2	46.5	1.17	132	2	0.13	9.9	3.54	2.01	0.65	1	11.3	21
1	146	2021-08-30 10:24:43	1	0	22.4766	83	4	male	1	1.55	54	No	Married	1	#NULL!	0	Other	0	0	1	0	0	1	0	0	72	2	41	#NULL!	11.88	4.08	60.1	157	2	1	14.52	2	46.5	2.04	231	2	0.23	10	#NULL!	#NULL!	#NULL!	#NULL!	20.7	14
1	451	2021-08-30 10:47:18	1	1	19.1953	71	2	male	1	1.63	51	No	Married	1	#NULL!	0	Digestive System	4	0	0	0	0	0	0	1	75	2	40	124	4.6	2.51	54.5	127	2	1	4.5	2	39.3	1.07	63	1	0.07	11.2	#NULL!	#NULL!	#NULL!	#NULL!	29.3	36
1	678	2021-09-01 08:48:43	2	0	25.4694	69	1	male	1	1.75	78	No	Married	1	#NULL!	0	Digestive System	0	0	0	0	0	0	0	0	75	2	46	#NULL!	4.21	2.35	55.9	124	2	1	3.75	1	35.6	1.49	228	2	0.16	7.2	#NULL!	#NULL!	#NULL!	#NULL!	7.3	17
1	548	2021-09-01 10:05:03	1	1	20.4382	68	1	male	1	1.67	57	No	Other	3	#NULL!	0	Digestive System	0	1	0	0	0	0	0	0	66	1	33	160	7.14	4.16	58.3	125	2	1	4.12	2	38.7	1.66	322	3	0.32	10	4.4	1.03	0.95	1	55.5	61
1	670	2021-09-01 17:37:38	2	1	17.9089	84	4	male	1	1.62	47	No	Married	1	#NULL!	0	Digestive System	0	0	1	0	0	0	0	0	59	1	33	132	5.68	3.43	60.5	117	1	1	3.94	1	35.8	1.82	262	2	0.21	8.1	4.43	0.81	0.91	1	11.3	16
1	691	2021-09-02 09:07:53	2	0	20.992	80	3	female	2	1.52	48.5	No	Married	1	#NULL!	0	Digestive System	4	0	0	0	0	0	0	0	66	1	37	#NULL!	3.81	2.72	71.4	115	1	2	3.58	1	35.4	0.6	213	2	0.2	9.2	#NULL!	#NULL!	#NULL!	#NULL!	11.7	13
1	511	2021-09-02 09:17:19	1	0	21.2585	75	2	male	1	1.68	60	No	Married	1	#NULL!	0	Digestive System	0	0	0	0	0	1	0	0	69	2	38	129	6.15	4.8	78	131	2	2	3.93	1	42.5	0.74	206	2	0.19	9.2	3.14	0.74	0.97	1	24.2	20
1	676	2021-09-02 10:00:30	1	1	20	75	2	female	2	1.5	45	No	Other	3	#NULL!	0	Respiratory System	0	0	1	0	0	0	0	0	64	1	39	#NULL!	8	6.08	76.2	130	2	2	4.14	2	38.9	1.32	213	2	0.2	9.2	4.58	1.11	1.84	0	5	43
1	534	2021-09-02 10:10:36	1	0	23.4375	77	3	male	1	1.6	60	No	Other	3	#NULL!	0	Respiratory System	4	0	0	0	0	0	0	1	58	1	32	140	2.97	4.67	72.8	113	1	2	15.84	2	35.2	1.13	197	2	0.16	8.3	5.02	1.63	0.77	1	9.8	11
1	700	2021-09-02 11:54:15	1	0	22.7732	75	2	male	1	1.65	62	No	Married	1	#NULL!	0	Digestive System	0	0	0	0	0	0	0	0	57	1	26	#NULL!	7.81	6.35	81.3	126	2	2	4.67	2	39.9	0.66	346	3	0.35	10.2	3.59	0.5	1.1	1	6.7	22
1	717	2021-09-03 09:51:13	1	0	25.7812	73	2	male	1	1.6	66	No	Married	1	#NULL!	0	Respiratory System	0	0	0	0	0	0	0	0	62	1	33	#NULL!	5.48	3.01	54.8	129	2	1	4.3	2	40	1.73	256	2	0.26	10.2	#NULL!	#NULL!	#NULL!	#NULL!	4.3	13
1	615	2021-09-03 10:37:45	1	0	22.0604	68	1	female	2	1.55	53	No	Married	1	#NULL!	0	Respiratory System	0	1	1	0	0	0	0	1	74	2	42	#NULL!	7.47	5.41	72.5	151	2	2	5.39	2	46.9	1.6	205	2	0.26	12.6	#NULL!	#NULL!	#NULL!	#NULL!	15.1	37
1	607	2021-09-04 08:49:18	1	0	21.7778	74	2	female	2	1.5	49	No	Married	1	#NULL!	0	Digestive System	0	0	0	0	0	0	0	1	68	1	39	#NULL!	2.13	1.27	59.9	85	1	1	3.16	1	27.1	0.69	80	1	0.08	10.2	2.77	1.33	0.68	1	16.5	10
1	606	2021-09-04 08:53:02	2	0	23.03	71	2	male	1	1.68	65	No	Married	1	#NULL!	0	Respiratory System	0	0	1	0	0	0	0	0	62	1	37	#NULL!	6.15	3.5	56.9	148	2	1	4.92	2	46.7	1.78	190	2	0.21	10.8	6.19	0.98	1.27	#NULL!	11.3	12
1	704	2021-09-04 08:53:53	1	0	25.2994	74	2	male	1	1.54	60	No	Married	1	#NULL!	0	Blood System	4	0	0	0	0	0	0	0	64	1	36	#NULL!	4.19	2.37	56.6	148	2	1	4.5	2	43.8	1.33	173	2	0.17	9.6	#NULL!	#NULL!	#NULL!	#NULL!	10.8	23
1	726	2021-09-04 23:30:21	1	1	#NULL!	70	1	male	1	1.68	#NULL!	Yes	Married	1	#NULL!	0	Respiratory System	0	0	0	0	0	1	0	0	57	1	30	95	20.1	6.09	75.5	140	2	2	23.9	2	42	1.01	78	1	0.09	12	#NULL!	#NULL!	#NULL!	#NULL!	23.4	129
1	720	2021-09-05 08:57:40	1	0	26.5731	71	2	male	1	1.68	75	No	Married	1	#NULL!	0	Other	0	1	1	0	0	0	0	0	82	2	43	#NULL!	6.19	3.69	59.5	138	2	1	4.38	2	41.4	2.09	229	2	0.22	9.4	#NULL!	#NULL!	#NULL!	#NULL!	11.7	29
1	482	2021-09-05 09:44:07	1	1	#NULL!	80	3	male	1	#NULL!	#NULL!	Yes	Married	1	#NULL!	0	Digestive System	0	0	1	1	1	1	0	0	69	2	41	#NULL!	7.83	6.95	88.7	110	1	2	3.45	1	33.4	0.44	170	2	0.15	9	#NULL!	#NULL!	#NULL!	#NULL!	10.3	28
1	623	2021-09-05 14:40:05	1	1	20.0777	76	3	male	1	1.53	47	No	Married	1	#NULL!	0	Skin & Appendages	4	0	0	0	0	1	0	0	65	1	30	107	149.49	9.38	84	112	1	2	99	2	34.3	0.6	251	2	0.2	8	2.22	0.68	0.62	1	12.5	15
1	539	2021-09-06 08:58:35	1	0	21.6128	71	2	male	1	1.68	61	No	Married	1	#NULL!	0	Digestive System	0	0	1	0	0	0	0	0	69	2	36	183	21.78	2.52	73.8	128	2	2	3.96	1	39	0.59	127	2	0.11	8.7	3.99	1.4	0.91	1	10.9	9
1	645	2021-09-06 09:39:58	1	1	16.6933	70	1	male	1	1.66	46	No	Married	1	#NULL!	0	Other	0	1	0	0	0	0	0	1	57	1	21	10	3.29	2.43	73.8	69	1	2	1.85	1	20.4	0.41	62	1	0.07	10.8	2.08	0.62	#NULL!	0	65.1	28
1	536	2021-09-07 09:00:25	2	1	20	73	2	female	2	1.5	45	No	Married	1	#NULL!	0	Digestive System	0	1	0	0	0	0	0	0	70	2	39	#NULL!	4.16	2.07	49.9	113	1	1	4.05	2	35.6	1.66	97	1	0.12	12.5	#NULL!	#NULL!	#NULL!	#NULL!	14	9
1	665	2021-09-07 09:13:41	1	0	23.5078	68	1	male	1	1.65	64	No	Married	1	#NULL!	0	Respiratory System	0	0	0	0	0	0	0	0	63	1	37	231	2.97	3.48	61	140	2	1	5.28	2	43	1.71	88	1	0.11	16.1	4.77	2.4	1.37	1	5.9	24
1	644	2021-09-07 10:10:19	1	1	19.721	73	2	male	1	1.67	55	No	Married	1	#NULL!	0	Respiratory System	0	0	0	0	0	0	0	0	71	2	23	#NULL!	10.26	7.98	77.7	99	1	2	3.83	1	31.5	1.44	389	3	0.29	7.5	2.09	0.23	0.53	1	7.2	27
1	735	2021-09-07 10:40:45	2	0	21.2306	69	1	male	1	1.58	53	No	Married	1	#NULL!	0	Respiratory System	0	1	1	1	0	0	0	0	61	1	35	#NULL!	4.25	2.39	56.2	134	2	1	4.13	2	39.4	1.45	114	2	0.14	12.5	3.39	1.03	1.1	1	7.4	14
1	694	2021-09-07 10:44:36	1	0	26.986	71	2	female	2	1.54	64	No	Married	1	#NULL!	0	Respiratory System	0	0	0	0	0	0	0	0	73	2	39	#NULL!	8.59	5.39	62.8	149	2	1	4.77	2	44.8	2.51	208	2	0.26	12.4	5.99	1.8	1.25	#NULL!	21	85
1	649	2021-09-07 10:55:59	1	0	24.5243	80	3	female	2	1.59	62	No	Other	3	#NULL!	0	Respiratory System	0	0	1	1	0	0	0	0	65	1	39	#NULL!	8.15	5.46	67	141	2	1	4.39	2	41.2	2.03	251	2	0.23	9.1	4.97	1.43	1.01	1	9	31
1	675	2021-09-07 13:07:08	1	1	18.6667	66	1	female	2	1.5	42	No	Married	1	#NULL!	0	Respiratory System	4	0	0	0	0	0	0	0	71	2	41	#NULL!	0.99	4.93	74.6	140	2	2	15.84	2	42.7	1.23	196	2	0.2	10.1	4.9	1.61	1.29	0	9.6	14
1	657	2021-09-08 08:50:46	2	0	20.9366	69	1	male	1	1.65	57	No	Married	1	#NULL!	0	Digestive System	4	0	0	0	0	0	0	0	51	1	33	#NULL!	2.68	1.5	56	63	1	1	1.35	1	18	1.08	60	1	#NULL!	#NULL!	2.63	0.36	1.19	0	10.2	33
1	698	2021-09-08 09:00:06	1	1	19.3772	83	4	male	1	1.7	56	No	Married	1	#NULL!	0	Reproductive System	4	0	1	0	0	0	0	0	72	2	43	230	3.71	2.11	56.8	108	1	1	3.47	1	32.3	1.27	194	2	0.19	9.6	5.3	1.56	1.47	#NULL!	13.1	18
1	743	2021-09-08 09:16:18	2	1	18.3673	88	5	female	2	1.4	36	No	Married	1	#NULL!	0	Digestive System	0	0	0	0	0	1	0	0	58	1	35	217	5	3.88	77.6	113	1	2	3.4	1	33.6	0.74	105	2	0.14	13.7	4.06	1.1	1.03	1	14.4	19
1	777	2021-09-08 09:32:20	2	1	18.1312	73	2	female	2	1.54	43	No	Married	1	#NULL!	0	Digestive System	0	1	0	0	0	0	0	0	75	2	44	209	5.75	3.97	68.9	140	2	1	4.67	2	42.4	1.53	184	2	0.16	8.6	5.91	0.79	1.77	#NULL!	17	19
1	739	2021-09-08 09:47:08	2	0	25.5102	77	3	male	1	1.68	72	No	Married	1	#NULL!	0	Digestive System	4	0	0	1	0	0	0	0	64	1	37	170	4.33	1.62	37.3	109	1	1	3.46	1	33.1	1.84	106	2	0.11	10	#NULL!	#NULL!	#NULL!	#NULL!	16.1	25
1	684	2021-09-09 09:01:27	1	0	133.769	69	1	male	1	0.58	45	No	Married	1	#NULL!	0	Reproductive System	4	0	0	1	0	0	0	0	60	1	37	272	4.1	3.14	48.9	136	2	1	5.2	2	41.5	2.75	259	2	0.23	8.8	5.87	2.84	1.17	#NULL!	6.8	14
1	528	2021-09-09 10:01:06	1	1	20.0777	65	1	female	2	1.53	47	No	Married	1	#NULL!	0	Digestive System	4	0	0	0	0	0	0	0	66	1	35	101	7.84	6.89	88	126	2	2	4.04	2	36	0.56	256	2	0.24	9.5	#NULL!	#NULL!	#NULL!	#NULL!	8.8	13
1	669	2021-09-09 11:04:50	1	0	22.2656	85	4	male	1	1.6	57	No	Divorced	4	#NULL!	0	Respiratory System	0	0	0	0	0	0	0	1	53	1	30	#NULL!	9.38	7.46	79.6	143	2	2	4.74	2	41.6	0.8	230	2	0.19	8.2	3.73	0.55	1.21	0	8.7	12
1	732	2021-09-10 09:36:40	1	0	21.9076	69	1	male	1	1.57	54	No	Married	1	#NULL!	0	Digestive System	0	0	1	0	1	0	0	0	64	1	38	#NULL!	6.2	3.16	50.7	148	2	1	4.79	2	44.7	2.38	179	2	0.16	9	4.26	0.97	1.15	1	5.2	38
1	716	2021-09-10 09:57:01	2	0	22.5827	72	2	male	1	1.63	60	No	Married	1	#NULL!	0	Skin & Appendages	0	0	0	0	0	0	0	0	62	1	39	#NULL!	5.3	2.67	44.4	168	2	1	3.2	1	49.1	2.59	200	2	0.2	10	#NULL!	#NULL!	#NULL!	#NULL!	21	15
1	718	2021-09-10 10:13:42	2	1	20.8117	78	3	female	2	1.55	50	No	Other	3	#NULL!	0	Respiratory System	0	0	1	0	0	0	0	0	74	2	42	#NULL!	8.03	4.68	58.2	155	2	1	5.16	2	46.6	2.57	217	2	0.22	10	#NULL!	#NULL!	#NULL!	#NULL!	27.3	19
1	705	2021-09-10 10:23:06	1	0	20.83	70	1	female	2	1.58	52	No	Married	1	#NULL!	0	Digestive System	0	1	1	0	0	0	0	0	70	2	45	235	6.29	5.02	79.9	136	2	2	4.27	2	39.8	0.85	172	2	0.15	8.6	#NULL!	#NULL!	#NULL!	#NULL!	17.2	26
1	695	2021-09-10 11:22:35	1	1	19.5312	71	2	male	1	1.6	50	No	Married	1	#NULL!	0	Respiratory System	4	0	0	0	0	0	0	0	73	2	41	#NULL!	1.58	0.34	21.6	121	2	1	3.64	1	37.4	0.93	243	2	0.22	9.1	3.39	1.05	1.05	1	10.5	38
1	613	2021-09-10 11:50:37	2	0	23.3067	78	3	male	1	1.67	65	No	Married	1	#NULL!	0	Respiratory System	0	1	0	0	0	1	0	1	73	2	27	#NULL!	12.05	9.47	78.5	118	1	2	4.25	2	35	1.2	200	2	0.2	10.2	#NULL!	#NULL!	#NULL!	#NULL!	13.5	32
1	624	2021-09-10 12:05:16	1	0	23.8087	69	1	male	1	1.69	68	No	Other	3	#NULL!	0	Respiratory System	0	1	1	0	0	1	0	0	76	2	47	#NULL!	7.03	4.13	58.6	171	2	1	5.38	2	53.6	2.27	153	2	0.17	11.1	6.18	1.1	1.7	#NULL!	17.4	31
1	789	2021-09-11 08:33:21	1	0	25.2994	74	2	male	1	1.54	60	No	Married	1	#NULL!	0	Blood System	4	0	0	0	0	0	0	0	69	2	39	#NULL!	3.05	1.72	56.3	154	2	1	4.64	2	45.6	0.93	137	2	0.15	10.7	#NULL!	#NULL!	#NULL!	#NULL!	12.9	21
1	638	2021-09-11 10:05:44	1	0	22.571	65	1	male	1	1.71	66	No	Married	1	#NULL!	0	Digestive System	0	0	0	0	0	0	0	1	63	1	31	85	3.49	1.82	51.9	148	2	1	4.1	2	45.5	1.21	55	1	0.06	10.1	3.26	0.81	1.2	0	44.1	45
1	656	2021-09-11 10:05:59	1	1	18.132	90	5	female	2	1.61	47	No	Widowed	0	#NULL!	0	Respiratory System	0	1	0	0	0	0	0	0	72	2	40	173	16.56	15.93	96.2	161	2	#NULL!	5.05	2	48.7	0.15	190	2	0.19	10.1	#NULL!	#NULL!	#NULL!	#NULL!	79.4	500
1	601	2021-09-11 10:08:59	2	1	19.5006	74	2	female	2	1.45	41	No	Other	3	#NULL!	0	Reproductive System	4	0	0	0	0	0	0	0	57	1	30	167	3.89	2.93	75.4	95	1	2	2.7	1	29.1	0.69	70	1	0.07	10.4	#NULL!	#NULL!	#NULL!	#NULL!	3.6	23
1	682	2021-09-12 08:45:28	2	1	16.3265	74	2	male	1	1.75	50	No	Married	1	#NULL!	0	Digestive System	0	0	0	0	0	0	0	0	61	1	33	188	6.8	5.33	78.4	126	2	2	3.99	1	37.7	1.12	164	2	0.14	8.8	3.8	0.88	1.81	0	19.2	98
1	661	2021-09-12 08:49:00	2	0	25.1111	65	1	female	2	1.5	56.5	No	Married	1	#NULL!	0	Digestive System	4	0	0	0	0	0	0	1	59	1	23	54	3.97	2.29	57.5	112	1	1	3.58	1	32.6	1.03	79	1	0.06	8.1	#NULL!	#NULL!	#NULL!	#NULL!	67.6	63
1	774	2021-09-12 09:10:50	1	1	19.052	82	4	female	2	1.62	50	No	Married	1	#NULL!	0	Digestive System	4	0	1	0	1	0	0	0	75	2	41	161	8.15	4.92	60.3	148	2	1	4.68	2	44.7	2.37	228	2	0.24	10.6	5.92	1.08	1.64	#NULL!	28.4	24
1	655	2021-09-12 09:40:44	2	1	14.6667	88	5	female	2	1.5	33	No	Widowed	0	#NULL!	0	Respiratory System	0	0	0	0	1	0	0	0	66	1	29	87.6	8.01	6.22	77.8	112	1	2	3.99	1	35.1	1.15	171	2	0.17	9.9	3.55	0.5	1.32	0	7.5	9
1	763	2021-09-12 09:49:29	2	1	16.6531	89	5	male	1	1.75	51	No	Married	1	#NULL!	0	Reproductive System	0	0	1	1	0	0	0	0	47	1	25	94	6.67	5.22	78.3	116	1	2	3.45	1	35.2	0.71	161	2	0.16	9.8	2.77	0.72	0.84	1	11.5	26
1	611	2021-09-12 10:32:54	2	0	24.977	73	2	male	1	1.65	68	No	Married	1	#NULL!	0	Respiratory system	0	0	0	0	1	0	0	0	65	1	37	229	4.66	2.29	49.1	140	2	1	4.26	2	43	1.77	157	2	0.17	11.1	4.44	1.57	0.85	1	7.7	9
1	761	2021-09-12 15:23:58	1	0	23.8751	77	3	male	1	1.65	65	No	Married	1	#NULL!	0	Reproductive System	0	0	1	0	0	0	0	0	74	2	43	#NULL!	0	3	55.8	171	2	1	1	2	50.2	1.74	118	2	0.15	12.7	#NULL!	#NULL!	#NULL!	#NULL!	14.1	31
1	709	2021-09-13 09:24:29	1	0	22.4913	65	1	male	1	1.7	65	No	Married	1	#NULL!	0	Digestive system	4	0	0	0	0	0	0	0	57	1	34	190	5.33	3.72	69.6	138	2	2	4.44	2	41.9	1	179	2	0.17	9.4	4.22	0.96	1.15	1	8.6	12
1	651	2021-09-13 11:55:13	1	0	21.9899	67	1	male	1	1.61	57	No	Married	1	#NULL!	0	Respiratory System	0	0	0	0	0	0	0	0	59	1	35	#NULL!	5.06	2.62	51.7	141	2	1	3.8	1	41.7	1.68	100	2	0.11	11.3	3.35	1	0.97	1	5.1	26
1	781	2021-09-14 09:12:49	2	0	26.2917	74	2	female	2	1.62	69	No	Married	1	#NULL!	0	Urinary System	0	0	0	0	0	1	0	0	73	2	42	225	5.25	2.37	45.1	147	2	1	4.55	2	46	2.11	153	2	0.15	10.1	#NULL!	#NULL!	#NULL!	#NULL!	18.6	19
1	823	2021-09-15 08:45:23	1	0	21.7778	66	1	female	2	1.5	49	No	Married	1	#NULL!	0	Respiratory System	4	0	1	0	0	0	0	0	55	1	37	181	4.4	2.82	64.2	120	1	1	4.05	2	36.7	0.99	254	2	0.22	8.7	2.84	0.77	0.95	1	11.3	16
1	712	2021-09-15 10:12:47	2	0	23.0469	78	3	male	1	1.6	59	No	Married	1	#NULL!	0	Respiratory System	0	0	0	0	0	0	0	1	62	1	34	#NULL!	6.3	4.35	69.1	148	2	1	4.71	2	44.3	1.44	245	2	0.2	8	#NULL!	#NULL!	#NULL!	#NULL!	12.5	14
1	603	2021-09-15 16:05:06	1	0	21.2306	81	4	male	1	1.58	53	No	Married	1	#NULL!	0	Respiratory System	4	0	0	0	0	0	0	0	68	1	39	#NULL!	9.19	5.76	62.7	155	2	1	4.85	2	46.5	1.88	305	3	0.3	9.9	#NULL!	#NULL!	#NULL!	#NULL!	7.4	29
1	831	2021-09-16 10:23:18	1	0	21.4844	68	1	female	2	1.6	55	No	Married	1	#NULL!	0	Reproductive System	4	1	0	0	0	0	0	0	73	2	43	222	6.3	4.17	66.2	145	2	1	4.42	2	42.9	1.77	195	2	0.17	8.5	5.11	1.29	1.16	1	6.2	23
1	671	2021-09-16 10:34:13	2	0	21.2306	65	1	male	1	1.58	53	No	Married	1	#NULL!	0	Digestive System	4	1	0	0	0	0	0	0	63	1	37	#NULL!	2.43	1.25	51.2	127	2	1	3.86	1	38.2	0.7	92	1	0.1	11.2	3.29	1.36	0.86	1	11.1	20
1	842	2021-09-17 08:28:23	1	0	20.992	80	3	female	2	1.52	48.5	No	Married	1	#NULL!	0	Digestive System	4	0	0	0	0	0	0	0	68	1	39	147	3.92	2.76	70.3	117	1	2	3.57	1	35.7	0.71	208	2	0.2	9.4	#NULL!	#NULL!	#NULL!	#NULL!	12.3	11
1	664	2021-09-17 09:52:33	1	0	23.3355	79	3	male	1	1.63	62	No	Married	1	#NULL!	0	Reproductive System	0	1	1	1	0	1	0	0	64	1	27	#NULL!	9.82	7.62	77.4	124	2	2	3.72	1	36.7	1.21	201	2	0.16	7.7	#NULL!	#NULL!	#NULL!	#NULL!	16.7	41
1	850	2021-09-18 08:16:23	1	0	24.8777	74	2	male	1	1.54	59	No	Married	1	#NULL!	0	Blood System	4	0	0	0	0	0	0	0	72	2	41	#NULL!	2.89	1.63	56.5	207	2	1	6.53	2	64	0.82	75	1	0.08	11	#NULL!	#NULL!	#NULL!	#NULL!	20.8	19
1	775	2021-09-18 08:38:09	1	1	13.8408	66	1	male	1	1.7	40	No	Married	1	#NULL!	0	Digestive System	4	0	0	0	0	0	0	0	79	2	40	#NULL!	5.88	3.07	52.2	145	2	1	4.46	2	43	1.75	403	3	0.36	9	#NULL!	#NULL!	#NULL!	#NULL!	76.8	56
1	863	2021-09-18 09:20:36	2	0	21.875	69	1	female	2	1.6	56	No	Married	1	#NULL!	0	Skin & Appendages	0	0	0	1	0	0	0	0	72	2	43	#NULL!	5.7	4.25	74.7	143	2	2	4.65	2	42	1.16	262	2	0.25	9.5	6.42	4.74	0.95	#NULL!	15.2	12
1	845	2021-09-18 09:30:50	2	0	21.0938	79	3	male	1	1.6	54	No	Married	1	#NULL!	0	Respiratory System	0	0	1	0	1	0	0	0	63	1	37	#NULL!	6.85	5.19	75.7	128	2	2	3.84	1	40.7	1.16	139	2	0.17	12.1	#NULL!	#NULL!	#NULL!	#NULL!	12.4	23
1	816	2021-09-18 09:47:13	1	0	25.3444	70	1	male	1	1.65	69	No	Married	1	#NULL!	0	Respiratory System	4	0	0	0	0	0	0	0	61	1	40	#NULL!	3.31	1.8	54.4	111	1	1	3.43	1	33	1.03	222	2	0.21	9.7	#NULL!	#NULL!	#NULL!	#NULL!	5.6	53
1	513	2021-09-19 08:56:21	1	0	22.3543	79	3	female	2	1.45	47	No	Married	1	#NULL!	0	Blood System	4	0	1	0	0	0	0	0	64	1	41	#NULL!	4.1	2.78	67.8	136	2	2	4.55	2	43	0.71	115	2	0.17	14.5	6.99	3.73	1.22	#NULL!	7.3	28
1	788	2021-09-19 09:10:02	2	0	20.7031	73	2	male	1	1.6	53	No	Married	1	#NULL!	0	Respiratory System	4	0	1	0	1	0	0	0	58	1	33	128	8.79	7.32	83.4	134	2	2	4.19	2	40.3	0.72	192	2	0.17	9.1	#NULL!	#NULL!	#NULL!	#NULL!	15.7	13
1	813	2021-09-19 09:25:58	1	1	19.1953	65	1	male	1	1.63	51	No	Married	1	#NULL!	0	Digestive System	0	0	0	0	0	0	0	0	65	1	38	217	5.33	3.57	67	129	2	1	4.66	2	39.8	1.26	338	3	0.31	9.2	4.16	0.77	1.28	0	19.7	21
1	854	2021-09-19 10:06:11	2	1	19.563	71	2	female	2	1.55	47	No	Married	1	#NULL!	0	Digestive System	4	1	0	0	0	0	0	0	72	2	42	201	20.5	1.05	48.4	137	2	1	3.3	1	40.3	0.75	107	2	0.1	9.4	6.4	1.01	1.71	#NULL!	32.1	39
1	693	2021-09-19 10:50:05	2	0	26.4024	65	1	female	2	1.52	61	No	Other	3	#NULL!	0	Respiratory System	0	0	0	0	0	0	0	0	71	2	41	#NULL!	5.48	2.71	49.5	135	2	1	4.17	2	41.2	2.38	188	2	0.2	10.8	#NULL!	#NULL!	#NULL!	#NULL!	7.5	26
1	847	2021-09-19 15:05:19	1	0	23.1111	77	3	female	2	1.5	52	No	Widowed	0	#NULL!	0	Respiratory System	0	1	1	0	1	0	0	0	49	1	26	87	5.93	4.01	67.5	94	1	2	3.2	1	27.3	0.67	81	1	0.08	9.8	3.36	2.45	0.07	1	102.3	31
1	866	2021-09-20 10:28:07	1	1	15.8169	89	5	female	2	1.55	38	No	Married	1	#NULL!	0	Respiratory System	4	0	0	0	1	0	0	1	67	1	30	#NULL!	4.12	3.02	73.3	132	2	2	4.07	2	41	0.63	188	2	0.19	10.3	5.18	1.09	1.37	0	14.8	18
1	820	2021-09-20 10:42:30	2	1	18.4965	81	4	male	1	1.74	56	No	Married	1	#NULL!	0	Respiratory System	4	0	0	1	0	0	0	0	70	2	28	#NULL!	4.3	6.04	62.7	102	1	1	9.6	2	31.9	2.9	248	2	0.26	10.5	3.85	1.23	0.59	1	5.3	13
1	619	2021-09-20 11:35:01	2	0	24.2424	68	1	male	1	1.65	66	No	Married	1	#NULL!	0	Digestive System	0	0	1	0	0	1	0	0	67	1	43	228	6.6	4.61	70.1	143	2	2	4.26	2	43.7	1.08	227	2	0.18	8.1	2.64	1.27	0.79	1	13.6	18
1	748	2021-09-20 11:35:36	1	0	23.3067	74	2	male	1	1.67	65	No	Married	1	#NULL!	0	Respiratory System	4	1	0	0	0	0	0	0	75	2	44	#NULL!	6.72	4.19	62.3	152	2	1	5.28	2	46.4	1.47	193	2	0.23	12.1	4.76	1.68	0.95	1	7.3	26
1	808	2021-09-20 22:14:56	1	1	20.4082	76	3	female	2	1.4	40	No	Married	1	#NULL!	0	Digestive System	0	1	0	0	0	0	0	0	52	1	26	70	33.66	5.84	93.3	100	1	2	0	1	32.7	0.34	379	3	0.41	10.8	8.46	1.54	0.91	#NULL!	10.2	21
1	800	2021-09-21 09:19:34	1	0	26.7094	80	3	female	2	1.56	65	No	Widowed	0	#NULL!	0	Digestive System	0	0	1	1	0	0	0	0	61	1	38	#NULL!	4.64	2.85	61.6	145	2	1	4.16	2	42.9	1.43	115	2	0.12	10.7	4.05	2.2	0.96	1	11.8	27
1	865	2021-09-21 10:24:33	1	0	20.889	85	4	male	1	1.63	55.5	No	Divorced	4	#NULL!	0	Respiratory System	4	0	0	0	0	0	0	1	63	1	36	#NULL!	9.61	8.77	91.2	147	2	2	4.81	2	42.8	0.47	470	3	0.36	7.7	#NULL!	#NULL!	#NULL!	#NULL!	9.2	15
1	793	2021-09-22 08:38:33	1	0	23.03	75	2	male	1	1.68	65	No	Married	1	#NULL!	0	Digestive System	0	0	0	0	0	0	0	0	71	2	39	149	0	3.78	70.5	128	2	2	0	1	39.7	1.01	208	2	0.19	9	3.28	0.78	0.97	1	24.4	16
1	837	2021-09-22 10:52:37	1	0	21.6441	75	2	female	2	1.55	52	No	Married	1	#NULL!	0	Respiratory System	0	0	0	0	0	0	0	0	58	1	34	#NULL!	4.15	2.05	49.3	130	2	1	4.02	2	38.7	1.66	125	2	0.14	10.8	2.92	0.62	1.23	0	9.6	21
1	890	2021-09-22 15:24:08	2	1	#NULL!	83	4	male	1	1.65	#NULL!	Yes	Widowed	0	#NULL!	0	Digestive System	0	0	0	0	0	1	0	1	61	1	31	#NULL!	6.3	5.42	86	108	1	2	2.98	1	33.7	0.39	229	2	0.22	9.6	#NULL!	#NULL!	#NULL!	#NULL!	25.5	26
1	846	2021-09-23 08:44:13	1	1	14.6924	73	2	male	1	1.65	40	No	Married	1	#NULL!	0	Digestive System	4	0	0	0	0	1	0	0	61	1	35	210	5.52	3.97	72	132	2	2	4.4	2	40.6	1.17	196	2	0.17	8.6	4.42	1.12	1.41	0	15.9	12
1	817	2021-09-23 08:52:39	2	0	20.7157	68	1	male	1	1.73	62	No	Married	1	#NULL!	0	Blood System	4	0	1	1	0	0	0	1	69	2	43	#NULL!	4.37	2.6	59.5	111	1	1	3.48	1	33	1.39	154	2	0.13	8.2	4	0.62	1.17	0	10.1	15
1	835	2021-09-23 09:41:27	1	1	18.1449	71	2	male	1	1.66	50	No	Married	1	#NULL!	0	Digestive System	4	0	0	0	0	0	0	0	71	2	40	133	7.5	2.11	47.7	114	1	1	1.1	1	35.2	1.43	53	1	0.06	10.8	3.65	0.84	1.19	0	34.9	37
1	737	2021-09-25 08:27:31	2	1	17.1225	77	3	female	2	1.47	37	No	Married	1	#NULL!	0	Respiratory System	0	0	0	0	1	0	0	0	62	1	33	#NULL!	8.75	6.78	77.5	117	1	2	3.68	1	36.3	1.16	175	2	0.19	11	5.92	1.54	0.82	#NULL!	11.7	9
1	904	2021-09-25 09:12:16	2	0	28.7197	74	2	male	1	1.7	83	No	Married	1	#NULL!	0	Respiratory System	4	0	1	0	0	0	0	0	70	2	39	#NULL!	8.74	6.03	69	157	2	1	4.75	2	46.9	2	244	2	0.21	8.7	#NULL!	#NULL!	#NULL!	#NULL!	9.2	17
1	900	2021-09-25 10:20:16	1	0	22.231	83	4	male	1	1.67	62	No	Married	1	#NULL!	0	Respiratory System	0	0	1	0	1	0	0	0	65	1	37	#NULL!	3.12	1.7	54.6	113	1	1	3.74	1	34	0.73	250	2	0.26	10.4	2.55	1.39	0.94	1	17.9	13
1	766	2021-09-26 10:11:04	2	0	28.6215	65	1	female	2	1.53	67	No	Married	1	#NULL!	0	Digestive System	4	0	0	0	0	0	0	0	62	1	38	216	8.98	6.6	73.5	115	1	2	5.31	2	36	1.9	294	2	0.27	9.2	4.55	1.72	0.94	1	9.6	15
1	915	2021-09-26 10:23:46	1	1	19.6506	76	3	male	1	1.53	46	No	Married	1	#NULL!	0	Other	0	0	1	0	0	0	0	0	66	1	33	#NULL!	7.8	6.25	80.1	90	1	2	4.13	2	30.2	1.18	266	2	0.26	9.6	5.08	0.78	1.12	1	6.3	12
1	939	2021-09-26 10:44:37	2	1	20	73	2	female	2	1.5	45	No	Married	1	#NULL!	0	Digestive System	0	1	0	0	0	0	0	0	70	2	38	#NULL!	3.96	1.79	45.4	114	1	1	3.83	1	35.5	1.8	70	1	0.08	11.9	#NULL!	#NULL!	#NULL!	#NULL!	10.2	15
1	869	2021-09-26 11:14:51	2	0	20.4444	74	2	female	2	1.5	46	No	Married	1	#NULL!	0	Digestive System	0	0	0	0	0	0	0	0	74	2	40	#NULL!	3.99	3.45	86.2	93	1	2	3.25	1	27.8	0.32	50	1	0.06	11.3	3.1	1.18	0.79	1	45.6	11
1	925	2021-09-26 14:15:10	1	0	20.5714	72	2	male	1	1.75	63	No	Married	1	#NULL!	0	Respiratory System	0	1	0	0	0	0	0	0	54	1	32	#NULL!	6.26	3.48	55.6	132	2	1	4.39	2	40.2	1.82	228	2	0.21	9	4.82	1.2	1.05	1	6.4	34
1	908	2021-09-26 14:31:16	1	0	21.7776	67	1	male	1	1.78	69	No	Married	1	#NULL!	0	Respiratory System	0	1	0	0	0	0	0	1	62	1	37	#NULL!	5.25	3.45	65.8	144	2	2	4.47	2	42.9	0.92	164	2	0.15	9.3	#NULL!	#NULL!	#NULL!	#NULL!	10.7	20
1	794	2021-09-26 16:39:47	2	0	21.7778	84	4	male	1	1.5	49	No	Married	1	#NULL!	0	Digestive System	4	0	0	0	0	1	0	0	57	1	26	119	5.8	11.45	89.2	114	1	2	2.3	1	34.3	0.73	412	3	0.33	8	3.28	0.77	0.84	1	6.3	49
1	833	2021-09-26 22:38:00	2	0	24.0238	65	1	male	1	1.67	67	No	Married	1	#NULL!	0	Respiratory System	4	0	1	0	0	0	0	0	68	1	29	#NULL!	9.95	6.22	62.5	88	1	1	3.07	1	27.1	2.54	388	3	0.41	10.7	3.53	0.92	0.7	1	3.3	82
1	861	2021-09-27 10:03:51	1	0	21.5451	79	3	male	1	1.71	63	No	Married	1	#NULL!	0	Respiratory System	4	0	1	0	1	0	0	1	53	1	33	#NULL!	7.01	3.45	49.2	130	2	1	3.77	1	39	2.75	120	2	0.17	13.8	3.55	1.18	1.38	0	8.4	20
1	864	2021-09-27 15:43:38	2	1	19.1001	65	1	male	1	1.65	52	No	Married	1	#NULL!	0	Respiratory System	4	0	0	0	0	0	0	0	58	1	32	#NULL!	7.57	5.88	77.8	132	2	2	4.02	2	40	1.1	270	2	0.23	8.5	4.68	0.87	1.43	0	5.8	16
1	922	2021-09-27 16:47:30	2	1	17.4818	76	3	male	1	1.55	42	No	Married	1	#NULL!	0	Skin & Appendages	4	0	0	0	0	1	0	0	70	2	32	112	22.7	2.33	51.1	104	1	1	9	2	32	1.45	170	2	0.14	8.4	2.77	1.56	0.54	1	15.2	23
1	946	2021-09-28 08:06:57	2	0	27.4587	73	2	male	1	1.78	87	No	Married	1	#NULL!	0	Endocrine System	4	0	0	0	0	0	0	0	64	1	38	190	8.57	6.81	79.5	167	2	2	5.17	2	49.4	1.01	165	2	0.17	10.6	3.74	1.12	0.87	1	20.6	29
1	710	2021-09-28 09:01:04	1	1	20.3954	73	2	female	2	1.55	49	No	Married	1	#NULL!	0	Respiratory System	4	0	0	0	0	0	0	0	65	1	40	206	7.45	4.89	65.6	152	2	1	4.83	2	45.8	1.85	216	2	0.22	9.9	5.63	1.75	1.42	#NULL!	5.9	19
1	941	2021-09-28 10:08:25	1	0	21.7784	67	1	female	2	1.56	53	No	Married	1	#NULL!	0	Digestive System	0	1	0	0	0	0	0	0	78	2	44	247	4.89	2.87	58.6	143	2	1	4.67	2	43.3	1.58	227	2	0.22	9.6	5.04	0.94	1.23	1	6.7	22
1	958	2021-09-28 15:24:18	2	0	23.03	67	1	male	1	1.68	65	No	Married	1	#NULL!	0	Respiratory System	4	0	0	0	0	0	0	0	69	2	37	#NULL!	3.7	1.88	50.8	92	1	1	2.65	1	27.9	1.07	85	1	0.08	9.5	#NULL!	#NULL!	#NULL!	#NULL!	8.3	14
1	754	2021-09-29 11:00:35	1	0	21.2279	79	3	male	1	1.55	51	No	Married	1	#NULL!	0	Respiratory System	4	0	0	0	0	0	0	0	69	2	40	#NULL!	5.39	3.17	58.9	161	2	1	4.81	2	47.3	1.82	152	2	0.15	9.6	5.68	1.05	1.39	#NULL!	16.9	23
1	806	2021-09-29 14:24:33	1	1	12.9083	68	1	male	1	1.67	36	No	Widowed	0	#NULL!	0	Digestive System	0	0	0	0	0	0	0	0	67	1	33	#NULL!	6.79	3.29	48.5	138	2	1	4.09	2	40.9	2.9	167	2	0.17	10.2	3.6	0.95	1.05	1	15.6	129
1	745	2021-09-30 08:56:01	2	0	24.6181	69	1	male	1	1.78	78	No	Married	1	#NULL!	0	Digestive System	0	0	0	0	0	0	0	0	76	2	48	#NULL!	4.08	2.26	55.4	125	2	1	3.86	1	37	1.44	245	2	0.19	7.6	#NULL!	#NULL!	#NULL!	#NULL!	13.5	19
1	949	2021-09-30 09:02:17	1	1	19.9594	67	1	male	1	1.66	55	No	Married	1	#NULL!	0	Digestive System	4	0	1	1	0	0	0	0	67	1	31	121	7.75	5.05	65.2	108	1	1	3.53	1	32.6	1.89	642	3	0.47	7.3	3.17	1.17	0.66	1	5.9	36
1	952	2021-09-30 09:05:26	2	0	25.333	77	3	male	1	1.68	71.5	No	Married	1	#NULL!	0	Digestive System	4	0	0	1	0	0	0	0	62	1	35	150	4.29	1.77	41	105	1	1	3.14	1	31.3	1.74	105	2	0.11	10.1	#NULL!	#NULL!	#NULL!	#NULL!	15.3	32
1	942	2021-09-30 09:51:05	1	1	20.4444	78	3	female	2	1.5	46	No	Married	1	#NULL!	0	Skin & Appendages	4	0	0	0	0	1	0	1	71	2	33	177	49.6	5.37	48.7	114	1	1	0.8	1	34.9	5	507	3	0.41	8.2	#NULL!	#NULL!	#NULL!	#NULL!	4.4	20
1	759	2021-09-30 10:39:33	1	1	#NULL!	80	3	female	2	1.51	#NULL!	Yes	Married	1	#NULL!	0	Urinary System	0	0	0	1	0	1	0	1	65	1	33	102.1	10.02	9.34	93.2	120	1	2	4.03	2	37.6	0.43	258	2	0.26	10	#NULL!	#NULL!	#NULL!	#NULL!	26.7	157
1	943	2021-09-30 10:47:51	1	1	19.1001	69	1	male	1	1.65	52	No	Married	1	#NULL!	0	Respiratory System	0	1	1	1	0	0	0	0	64	1	38	#NULL!	5	3.45	68.8	124	2	1	3.73	1	36.4	1.23	92	1	0.1	10.3	4.62	0.78	1.46	0	12.7	27
1	884	2021-09-30 12:59:59	2	0	23.833	86	5	female	2	1.56	58	No	Widowed	0	#NULL!	0	Reproductive System	4	0	1	0	0	0	0	0	69	2	35	116	7.1	5.85	82.5	118	1	2	3.8	1	36.3	0.74	156	2	0.17	10.7	3.17	0.86	0.78	1	13	24
1	787	2021-09-30 13:17:53	1	0	22.4082	78	3	male	1	1.69	64	No	Widowed	3	#NULL!	0	Respiratory System	0	0	0	0	0	0	0	0	64	1	36	#NULL!	2.9	4.84	61.1	151	2	1	3.9	1	45.4	2.29	218	2	0.19	8.6	6.92	1.48	1.34	#NULL!	8	39
1	583	2021-10-01 10:43:43	2	1	18.3391	71	2	male	1	1.7	53	No	Other	3	#NULL!	0	Respiratory System	0	0	0	0	1	0	0	0	64	1	35	#NULL!	7.54	5.92	78.6	145	2	2	5.03	2	43.6	1.06	210	2	0.23	11	4.11	0.99	0.77	1	10	15
1	963	2021-10-01 11:29:59	2	1	20.7612	81	4	male	1	1.7	60	No	Married	1	#NULL!	0	Respiratory System	4	0	1	1	1	0	0	0	56	1	35	200	4.69	3.54	75.5	154	2	2	5.28	2	45.5	0.77	93	1	0.1	10.5	4.51	0.9	1.15	1	13.3	30
1	879	2021-10-02 08:58:55	1	1	20.3954	68	1	female	2	1.55	49	No	Other	3	#NULL!	0	Reproductive system	0	0	0	0	0	0	0	0	65	1	39	259	2	4.56	74	118	1	2	1	1	37.5	1.31	254	2	0.26	10.3	5.31	0.89	1.46	#NULL!	5.6	17
1	928	2021-10-02 11:12:17	1	1	20.3125	71	2	male	1	1.6	52	No	Married	1	#NULL!	0	Respiratory System	4	0	0	0	0	0	0	0	70	2	42	#NULL!	1.96	0.92	46.7	125	2	1	3.58	1	37	0.73	185	2	0.18	9.5	3.3	0.78	1.08	1	6.3	37
1	873	2021-10-03 10:26:03	2	0	23.1111	70	1	female	2	1.5	52	No	Married	1	#NULL!	0	Digestive system	4	0	0	0	0	1	0	0	69	2	41	#NULL!	686.9	6.63	81.6	121	2	2	2220.9	2	36.3	1.06	213	2	0.22	10.3	#NULL!	#NULL!	#NULL!	#NULL!	5.8	30
1	920	2021-10-04 08:32:26	1	1	18.0737	74	2	female	2	1.45	38	No	Married	1	#NULL!	1	Reproductive system	4	0	0	0	0	0	0	0	67	1	34	#NULL!	4.44	3.37	75.9	79	1	2	2.28	1	24.6	0.8	103	2	0.11	10.9	#NULL!	#NULL!	#NULL!	#NULL!	2.8	33
1	918	2021-10-04 10:00:31	2	1	18.4676	67	1	female	2	1.49	41	No	Married	1	#NULL!	0	Respiratory System	4	0	0	0	0	0	0	1	58	1	40	#NULL!	4.52	3.03	66.9	116	1	1	3.71	1	34.8	1.14	356	3	0.31	8.6	6.25	1.41	1.55	#NULL!	7.1	19
1	945	2021-10-04 10:41:17	2	0	26.986	65	1	female	2	1.54	64	No	Married	1	#NULL!	0	Respiratory System	0	0	0	0	0	0	0	0	60	1	37	#NULL!	3.8	1.71	44.9	120	1	1	3.59	1	36.5	1.8	147	2	0.13	8.9	3.83	3.27	0.88	1	7.2	17
1	891	2021-10-04 10:45:19	1	0	21.5645	66	1	female	2	1.64	58	No	Married	1	#NULL!	0	Respiratory System	0	0	0	0	0	0	0	0	77	2	47	#NULL!	4.51	2.96	65.7	123	2	1	4.12	2	37.8	1.31	184	2	0.15	8.2	6.07	4.94	1.02	#NULL!	6.6	21
1	940	2021-10-04 11:16:28	2	0	23.5102	69	1	male	1	1.75	72	No	Married	1	#NULL!	0	Respiratory System	0	1	0	0	0	0	0	0	60	1	33	#NULL!	7.2	5.81	80.8	153	2	2	5.07	2	47.2	0.86	155	2	0.18	11.6	#NULL!	#NULL!	#NULL!	#NULL!	7.8	17
1	934	2021-10-04 11:28:54	1	1	#NULL!	86	5	male	1	1.65	#NULL!	Yes	Married	1	#NULL!	0	Digestive System	0	0	1	1	1	1	0	0	69	2	39	152.2	10.06	8.83	87.7	151	2	2	4.93	2	46.9	0.44	133	2	0.15	11.2	5.16	1.29	1.04	1	34.3	19
1	848	2021-10-04 15:20:00	2	1	17.6309	71	2	male	1	1.65	48	No	Married	1	#NULL!	0	Respiratory System	0	0	0	0	0	0	0	0	65	1	42	#NULL!	0	3.43	60.7	132	2	1	2.2	1	41	1.54	203	2	0.19	9.5	4.47	0.69	1.29	0	5.6	15
1	995	2021-10-05 08:13:39	2	1	18.6709	82	4	female	2	1.62	49	No	Married	1	#NULL!	0	Digestive System	4	1	1	0	1	0	0	0	68	1	36	113	8.38	5.78	69	130	2	2	4.16	2	39	1.72	192	2	0.19	9.7	5.32	0.73	1.51	#NULL!	30.6	16
1	895	2021-10-05 09:33:50	2	0	26.7299	68	1	male	1	1.73	80	No	Married	1	#NULL!	0	Respiratory System	0	0	1	0	0	0	0	0	61	1	36	#NULL!	8.45	6.09	72	142	2	2	4.79	2	42.2	1.73	286	2	0.22	7.8	4.98	2.05	0.88	1	10.6	30
1	786	2021-10-05 09:35:00	1	0	23.03	67	1	male	1	1.68	65	No	Other	3	#NULL!	0	Digestive System	0	0	1	0	1	0	0	0	65	1	33	66	9.37	6.91	73.8	128	2	2	3.78	1	38	1.32	124	2	0.16	13	3.02	2.88	0.04	1	317.3	67
1	902	2021-10-05 11:43:35	1	0	25.204	71	2	female	2	1.53	59	No	Married	1	#NULL!	0	Respiratory System	0	0	1	0	0	0	0	0	68	1	39	#NULL!	4.52	2.35	52	131	2	1	4.21	2	39	1.69	171	2	0.2	11.9	#NULL!	#NULL!	#NULL!	#NULL!	4.8	29
1	856	2021-10-05 15:49:47	1	1	19.4734	72	2	male	1	1.57	48	No	Married	1	#NULL!	0	Respiratory System	0	0	0	0	0	0	0	0	70	2	42	#NULL!	6.89	3.75	54.3	167	2	1	4.89	2	49.7	2.49	134	2	0.2	14.5	5.46	1.79	1.55	#NULL!	27.6	39
1	977	2021-10-06 09:13:52	2	1	18.8189	82	4	male	1	1.63	50	No	Married	1	#NULL!	0	Digestive System	4	1	1	0	0	1	0	0	58	1	34	#NULL!	3.18	2.5	78.8	128	2	2	4.1	2	37.9	0.49	80	1	0.08	10.1	#NULL!	#NULL!	#NULL!	#NULL!	20	80
1	875	2021-10-06 10:29:47	2	0	23.1911	75	2	female	2	1.54	55	No	Married	1	#NULL!	0	Respiratory System	0	1	1	1	0	0	0	0	85	2	47	#NULL!	9.69	5.9	60.9	155	2	1	5.07	2	46.3	3.26	362	3	0.41	11.3	6.53	7.37	0.92	#NULL!	9	35
1	947	2021-10-06 13:23:40	1	0	23.2335	81	4	male	1	1.58	58	No	Married	1	#NULL!	0	Respiratory System	4	0	0	0	0	0	0	0	66	1	40	#NULL!	5.55	2.66	47.8	136	2	1	4.19	2	40.7	1.75	503	3	0.48	9.5	#NULL!	#NULL!	#NULL!	#NULL!	5.6	36
1	1033	2021-10-08 08:18:21	1	0	20.9366	80	3	male	1	1.65	57	No	Married	1	#NULL!	0	Digestive System	0	0	1	0	0	0	0	0	72	2	39	#NULL!	14.09	12.72	90.3	150	2	2	5.21	2	48.7	0.59	220	2	0.24	10.8	4.78	0.85	1.14	1	20	8
1	921	2021-10-08 09:40:06	1	1	17.3333	81	4	female	2	1.5	39	No	Widowed	0	#NULL!	0	Urinary System	4	0	0	0	0	1	0	0	64	1	39	#NULL!	51.4	4.39	75.6	111	1	2	5572.7	2	34.3	0.94	203	2	0.21	10.2	#NULL!	#NULL!	#NULL!	#NULL!	7	13
1	1042	2021-10-08 10:27:58	2	1	18.0737	65	1	female	2	1.45	38	No	Married	1	#NULL!	0	Reproductive System	0	1	0	0	0	0	0	0	72	2	40	#NULL!	3.06	1.51	49.3	80	1	1	2.42	1	24.7	1.24	90	1	0.08	8.9	#NULL!	#NULL!	#NULL!	#NULL!	7	28
1	972	2021-10-08 11:54:34	2	0	21.7776	69	1	male	1	1.78	69	No	Married	1	#NULL!	0	Respiratory System	4	0	1	0	0	0	0	0	72	2	40	#NULL!	7.3	6.78	76.1	151	2	2	6.2	2	45.4	1.55	248	2	0.22	8.7	5.93	1.83	1.08	#NULL!	14	12
1	1011	2021-10-09 10:26:18	2	1	17.9282	73	2	male	1	1.67	50	No	Married	1	#NULL!	0	Respiratory System	4	0	0	0	0	0	0	0	61	1	36	#NULL!	9.29	7.06	76.1	127	2	2	3.95	1	38	1.67	383	3	0.36	9.4	4.85	1.32	1.29	0	5.3	15
1	1040	2021-10-10 08:29:37	2	0	25.9516	68	1	male	1	1.7	75	No	Widowed	1	#NULL!	0	Respiratory System	4	0	0	0	0	0	0	0	70	2	39	256	5.47	2.78	50.7	153	2	1	4.77	2	45.2	1.56	213	2	0.23	10.9	4.98	2.55	0.98	1	8.6	17
1	1070	2021-10-10 09:12:12	1	0	25.7117	72	2	male	1	1.65	70	No	Widowed	0	#NULL!	0	Respiratory System	0	0	1	0	0	0	0	0	61	1	37	#NULL!	10.19	6.65	65.2	140	2	1	4.33	2	43.4	2.39	228	2	0.2	8.9	#NULL!	#NULL!	#NULL!	#NULL!	8.1	22
1	1036	2021-10-10 10:23:11	1	0	20.5761	66	1	male	1	1.62	54	No	Married	1	#NULL!	0	Respiratory System	4	0	0	0	0	0	0	1	60	1	26	#NULL!	15.09	13.02	86.2	96	1	2	3.51	1	30.9	0.98	566	3	0.63	11.2	4.21	0.99	0.78	1	6.7	15
1	1026	2021-10-11 08:14:33	1	0	24.974	74	2	male	1	1.55	60	No	Other	3	#NULL!	0	Blood System	4	0	0	0	0	0	0	0	61	1	34	238	3.29	2.09	63.3	142	2	1	4.46	2	42.9	0.72	174	2	0.15	8.7	#NULL!	#NULL!	#NULL!	#NULL!	10.3	18
1	887	2021-10-11 08:42:41	1	1	13.6254	77	3	male	1	1.67	38	No	Married	1	#NULL!	0	Respiratory System	0	0	0	0	0	0	0	1	69	2	28	#NULL!	10.41	9.04	86.8	135	2	2	4.51	2	43.5	0.62	261	2	0.22	8.3	#NULL!	#NULL!	#NULL!	#NULL!	10	15
1	1064	2021-10-11 10:37:51	2	1	18.6667	88	5	male	1	1.5	42	No	Married	1	#NULL!	0	Other	0	0	0	0	0	0	0	0	56	1	31	77	5.56	4.92	88.5	143	2	2	5.15	2	45.3	0.2	70	1	0.06	9.1	3.59	1.24	0.93	1	26.1	14
1	1075	2021-10-11 11:39:42	2	1	20.0773	88	5	male	1	1.64	54	No	Married	1	#NULL!	0	Respiratory System	4	0	0	0	0	0	0	0	74	2	43	#NULL!	3.74	1.74	46.6	148	2	1	4.36	2	43.1	1.46	161	2	0.16	9.6	#NULL!	#NULL!	#NULL!	#NULL!	23.9	12
1	1067	2021-10-12 10:08:46	2	0	21.4844	68	1	female	2	1.6	55	No	Married	1	#NULL!	0	Reproductive System	0	1	0	0	0	0	0	0	70	2	40	212	6.28	4.03	64.2	137	2	1	4.29	2	41.8	1.86	206	2	0.18	8.5	5.1	1.07	1.13	1	4.7	20
1	1038	2021-10-12 10:25:20	2	0	21.875	68	1	male	1	1.6	56	No	Married	1	#NULL!	0	Digestive System	0	0	0	0	0	0	0	0	61	1	28	#NULL!	8.8	4.71	53.5	130	2	1	4.21	2	40.6	2.47	383	3	0.41	10.6	#NULL!	#NULL!	#NULL!	#NULL!	49.3	62
1	1060	2021-10-12 10:50:20	2	0	30.4867	68	1	female	2	1.65	83	No	Married	1	#NULL!	0	Reproductive System	4	0	1	0	0	0	0	0	74	2	43	258	4.04	2.37	58.6	162	2	1	4.87	2	48	1.41	111	2	0.15	13.7	6.59	3.77	1.09	#NULL!	11.3	72
1	881	2021-10-12 10:53:37	1	0	24.093	77	3	male	1	1.68	68	No	Other	3	#NULL!	0	Respiratory System	0	0	1	0	1	0	0	0	75	2	46	#NULL!	5.18	2.75	53.1	175	2	1	5.16	2	51	1.92	166	2	0.16	9.7	3.71	2.98	0.89	1	12.1	24
1	1005	2021-10-12 14:12:50	1	0	23.3067	74	2	male	1	1.67	65	No	Married	1	#NULL!	0	Respiratory System	4	1	0	0	0	0	0	0	75	2	42	#NULL!	4.1	3.76	69.1	136	2	2	1	1	40.1	1.15	252	2	0.24	9.5	4.47	1.45	0.78	1	3.9	30
1	1086	2021-10-13 08:58:31	1	0	22.8571	69	1	male	1	1.75	70	No	Married	1	#NULL!	0	Digestive System	0	0	0	0	0	0	0	0	62	1	31	#NULL!	4.66	3.14	67.3	158	2	1	4.87	2	46.9	1.05	119	2	0.12	9.7	4.32	0.81	1.28	0	20.8	63
1	996	2021-10-13 09:16:27	1	1	14.5329	66	1	male	1	1.7	42	No	Married	1	#NULL!	0	Digestive System	4	0	0	0	0	0	0	0	76	2	36	147	6.53	4.38	67	122	2	2	3.78	1	37	1.14	495	3	0.44	8.8	#NULL!	#NULL!	#NULL!	#NULL!	122.1	73
1	1055	2021-10-13 09:39:16	2	1	19.3625	70	1	male	1	1.67	54	No	Married	1	#NULL!	0	Respiratory System	4	1	1	1	0	0	0	0	65	1	39	195	6.35	5.38	84.7	132	2	2	4.47	2	38.8	0.62	176	2	0.15	8.5	3.5	0.68	0.92	1	9.4	10
1	909	2021-10-13 09:43:27	2	1	17.0874	67	1	female	2	1.53	40	No	Other	3	#NULL!	0	Digestive System	4	1	0	0	0	1	0	1	73	2	39	91	5.75	4.73	82.3	119	1	2	3.8	1	35.2	0.75	175	2	0.22	12.4	3.96	0.85	1.15	1	18.2	11
1	1077	2021-10-13 10:36:06	2	0	31.2175	68	1	female	2	1.55	75	No	Married	1	#NULL!	0	Respiratory System	0	0	1	1	1	0	0	0	68	1	41	#NULL!	4.59	3.03	65.9	125	2	1	4.42	2	38.9	0.96	206	2	0.23	11	#NULL!	#NULL!	#NULL!	#NULL!	16.1	23
1	1085	2021-10-13 11:10:42	1	1	18.75	79	3	male	1	1.6	48	No	Married	1	#NULL!	0	Reproductive System	4	0	1	0	0	0	0	1	54	1	23	#NULL!	6.13	5.34	87.1	55	1	2	2.25	1	18	0.51	187	2	0.17	8.9	#NULL!	#NULL!	#NULL!	#NULL!	14.5	22
1	936	2021-10-14 09:14:02	2	1	13.9578	72	2	male	1	1.65	38	No	Married	1	#NULL!	1	Digestive System	0	0	1	0	0	1	0	1	59	1	24	40	19.31	17.87	92.5	93	1	2	3.07	1	28	0.65	203	2	0.23	11.3	#NULL!	#NULL!	#NULL!	#NULL!	13.7	34
1	1039	2021-10-14 09:44:03	2	1	19.5312	76	3	male	1	1.6	50	No	Married	1	#NULL!	0	Reproductive System	0	0	0	0	0	1	0	0	66	1	41	#NULL!	7.39	5.52	74.6	138	2	2	4.44	2	43.3	1.28	148	2	0.14	9.6	#NULL!	#NULL!	#NULL!	#NULL!	11.5	10
1	957	2021-10-14 10:03:59	2	0	20.5499	71	2	male	1	1.68	58	No	Married	1	#NULL!	0	Respiratory System	0	0	0	0	0	1	0	1	67	1	35	#NULL!	7.26	4.79	66	136	2	1	5.09	2	41.7	1.5	193	2	0.19	9.9	#NULL!	#NULL!	#NULL!	#NULL!	7.1	51
1	1000	2021-10-14 10:12:11	1	0	20.5693	69	1	male	1	1.65	56	No	Married	1	#NULL!	0	Respiratory System	0	0	1	0	0	0	0	0	55	1	29	#NULL!	10.77	8.94	83	99	1	2	3.01	1	29.3	0.86	112	2	0.12	10.8	#NULL!	#NULL!	#NULL!	#NULL!	5	12
1	1032	2021-10-14 11:02:36	1	0	21.7502	77	3	female	2	1.47	47	No	Married	1	#NULL!	0	Other	0	0	1	0	1	0	0	0	61	1	35	137	6.22	3.61	58	125	2	1	4.14	2	38.2	2.08	130	2	0.19	14.4	4.19	1.12	1.05	1	10.4	9
1	1052	2021-10-16 08:44:45	2	1	19.563	71	2	female	2	1.55	47	No	Widowed	0	#NULL!	0	Digestive System	0	1	0	0	0	0	0	0	73	2	41	201	2.21	1.28	57.8	148	2	1	4.38	2	44	0.58	100	2	0.09	9.2	6.64	1.36	1.87	#NULL!	40.1	33
1	1079	2021-10-16 09:08:50	2	0	24.841	68	1	male	1	1.63	66	No	Married	1	#NULL!	0	Respiratory System	4	1	0	0	1	0	0	0	60	1	33	#NULL!	8.72	7.95	91.1	136	2	2	4.13	2	40.4	0.47	182	2	0.18	10.1	5.02	0.79	1.8	0	15.5	208
1	1016	2021-10-16 09:14:24	1	0	23.2335	81	4	female	2	1.58	58	No	Other	3	#NULL!	0	Digestive System	0	1	1	1	0	0	0	0	75	2	36	160	7.66	5.44	71	126	2	2	4.77	2	40	1.63	262	2	0.26	10	#NULL!	#NULL!	#NULL!	#NULL!	5.5	18
1	1083	2021-10-16 09:39:07	1	1	17.5064	73	2	male	1	1.69	50	No	Married	1	#NULL!	0	Respiratory System	0	0	0	0	1	0	0	0	60	1	34	176	4.85	3.19	65.8	122	2	1	3.75	1	37.3	1.38	130	2	0.12	9.5	3.4	0.97	0.78	1	11.9	15
1	1012	2021-10-16 10:47:26	2	0	461.681	67	1	female	2	0.57	150	No	Married	1	#NULL!	0	Respiratory System	0	0	1	0	1	0	0	0	74	2	46	#NULL!	6.21	4.29	69.2	152	2	1	4.73	2	45.3	1.62	275	2	0.27	9.7	5.05	1.95	1.3	1	8.3	36
1	981	2021-10-17 08:25:20	1	0	22.0604	75	2	female	2	1.55	53	No	Widowed	0	#NULL!	0	Reproductive System	0	0	1	0	0	0	0	0	71	2	42	262	6.65	3.5	52.7	142	2	1	4.03	2	40.5	2.79	221	2	0.2	8.9	#NULL!	#NULL!	#NULL!	#NULL!	14.1	20
1	1147	2021-10-17 09:18:44	1	0	22.6562	68	1	male	1	1.6	58	No	Married	1	#NULL!	0	Blood System	0	0	0	0	0	0	0	0	42	1	28	59	68.68	1.7	2.4	33	1	1	1.18	1	11	9.52	73	1	#NULL!	#NULL!	#NULL!	#NULL!	#NULL!	#NULL!	5.6	6
1	1184	2021-10-17 09:30:37	1	0	21.0938	77	3	male	1	1.6	54	No	Married	1	#NULL!	0	Reproductive System	0	0	1	0	0	0	0	0	74	2	39	#NULL!	5.59	3.45	61.5	171	2	1	5.39	2	50.6	1.69	215	2	0.18	8.2	#NULL!	#NULL!	#NULL!	#NULL!	11.1	27
1	1164	2021-10-17 10:01:57	1	1	18.7305	74	2	female	2	1.55	45	No	Married	1	#NULL!	0	Digestive System	0	1	0	0	0	0	0	0	67	1	38	#NULL!	3.77	1.94	51.7	114	1	1	3.61	1	35.5	1.47	54	1	0.07	13.5	#NULL!	#NULL!	#NULL!	#NULL!	12.9	13
1	1192	2021-10-18 08:16:14	1	0	25.3902	74	2	male	1	1.55	61	No	Married	1	#NULL!	0	Blood System	4	0	0	0	0	0	0	0	68	1	41	#NULL!	4.41	2.58	58.3	154	2	1	4.77	2	47.1	1.09	175	2	0.19	10.8	#NULL!	#NULL!	#NULL!	#NULL!	17.9	19
1	999	2021-10-18 09:56:19	1	1	18.9292	87	5	male	1	1.72	56	No	Married	1	#NULL!	0	Hematologic System	0	0	0	0	0	0	0	0	73	2	38	158	5.34	3.14	58.9	149	2	2	4.7	2	43.1	0.94	94	1	0.1	11	4.56	1.23	0.9	1	18.5	12
1	992	2021-10-18 10:01:12	2	1	17.5064	79	3	male	1	1.69	50	No	Married	1	#NULL!	0	Reproductive System	0	0	0	0	0	1	0	0	69	2	33	#NULL!	4.51	2.51	55.8	115	1	1	3.48	1	34.8	1.48	206	2	0.19	9.4	#NULL!	#NULL!	#NULL!	#NULL!	5	25
1	1112	2021-10-18 12:27:12	2	0	23.3234	68	1	male	1	1.72	69	No	Married	1	#NULL!	0	Digestive System	4	1	0	0	0	0	0	0	72	2	43	#NULL!	6.5	5.13	78.9	126	2	2	4.03	2	37.3	0.82	186	2	0.24	13	#NULL!	#NULL!	#NULL!	#NULL!	14.5	25
1	1082	2021-10-18 14:55:51	1	0	20.8307	67	1	male	1	1.78	66	No	Married	1	#NULL!	0	Respiratory System	0	1	0	0	0	0	0	0	60	1	37	#NULL!	6.09	4.53	74.4	140	2	2	4.4	2	42	1.01	183	2	0.18	9.8	#NULL!	#NULL!	#NULL!	#NULL!	6.9	19
1	1115	2021-10-19 09:39:43	1	0	22.4766	67	1	female	2	1.55	54	No	Married	1	#NULL!	0	Respiratory System	4	0	0	0	0	0	0	0	73	2	44	#NULL!	3.51	2.7	77.1	130	2	2	4.09	2	39.2	0.66	118	2	0.11	8.9	#NULL!	#NULL!	#NULL!	#NULL!	16	16
1	1004	2021-10-19 11:49:14	2	0	24.2439	72	2	female	2	1.56	59	No	Married	1	#NULL!	0	Respiratory System	0	0	0	0	0	0	0	0	64	1	39	#NULL!	10.9	3.5	55.1	148	2	1	4.1	2	45.2	2.23	204	2	0.25	12.4	4.67	1.75	1.16	1	10	18
1	1002	2021-10-19 11:50:29	1	1	20.2812	75	2	male	1	1.72	60	No	Married	1	#NULL!	0	Respiratory System	0	0	0	1	0	1	0	1	75	2	34	#NULL!	13.78	12.31	89.3	80	1	2	4.06	2	29	0.9	529	3	0.46	8.7	#NULL!	#NULL!	#NULL!	#NULL!	8.8	14
1	1020	2021-10-19 13:31:44	1	0	22.6757	73	2	male	1	1.68	64	No	Married	1	#NULL!	0	Respiratory System	0	0	0	0	0	0	0	0	77	2	50	#NULL!	5.04	3.85	76.5	162	2	2	5.06	2	48.4	0.92	192	2	0.2	10.2	6.33	1.24	1.71	#NULL!	26.8	23
1	1150	2021-10-20 09:23:17	2	1	19.8352	79	3	male	1	1.71	58	No	Married	1	#NULL!	0	Respiratory system	4	0	1	0	1	0	0	1	61	1	38	#NULL!	4.22	3.13	74.2	124	2	2	3.64	1	38	0.8	66	1	0.1	15	4.44	1.01	1.79	0	8.3	30
1	1131	2021-10-20 10:18:27	2	1	18.6667	84	4	female	2	1.5	42	No	Married	1	#NULL!	0	Respiratory System	0	0	0	0	0	0	0	1	53	1	28	#NULL!	9.95	8.66	87	113	1	2	3.55	1	34.6	0.82	221	2	0.19	8.8	3.78	1.15	0.89	1	9.3	11
1	1078	2021-10-20 11:18:13	2	1	#NULL!	79	3	female	2	1.5	#NULL!	Yes	Married	1	#NULL!	0	Other	4	0	1	0	0	1	0	0	67	1	34	124	8.64	7.24	83.8	78	1	2	2.73	1	23.6	0.95	527	3	0.42	7.9	3.84	0.94	1.23	0	5.7	14
1	994	2021-10-20 11:21:03	2	0	21.7738	68	1	male	1	1.66	60	No	Married	1	#NULL!	0	Urinary System	4	0	0	0	0	0	0	0	68	1	39	196	9.43	7.66	81.2	130	2	2	4.13	2	37.4	1.18	192	2	0.17	8.7	#NULL!	#NULL!	#NULL!	#NULL!	10.5	20
1	1048	2021-10-20 11:32:55	2	1	18.3655	71	2	male	1	1.65	50	No	Other	3	#NULL!	0	Digestive System	4	0	0	0	0	0	0	0	63	1	34	100	12.7	4.69	74	120	1	2	2.1	1	35.6	0.38	27	1	0.02	8.9	2.85	0.82	0.83	1	43.1	38
1	1066	2021-10-20 13:14:58	2	1	#NULL!	84	4	male	1	1.68	#NULL!	Yes	Widowed	0	#NULL!	0	Digestive System	0	0	1	0	0	0	0	0	52	1	27	129.8	4.43	3.59	81.3	129	2	2	4.37	2	39.7	0.54	167	2	0.14	8.6	#NULL!	#NULL!	#NULL!	#NULL!	17.3	34
1	767	2021-10-21 08:46:21	2	0	28.6501	80	3	male	1	1.65	78	No	Married	1	#NULL!	0	Respiratory System	0	0	1	1	1	0	0	0	58	1	34	#NULL!	6.53	4.68	71.6	134	2	2	4.15	2	41.3	1.14	177	2	0.16	9.1	#NULL!	#NULL!	#NULL!	#NULL!	7	15
1	1190	2021-10-21 09:24:20	1	0	24.3824	83	4	male	1	1.67	68	No	Married	1	#NULL!	0	Respiratory System	4	0	1	0	1	0	0	0	75	2	41	#NULL!	4.98	3.8	76.2	130	2	2	4.32	2	39.9	0.66	239	2	0.26	11	2.47	0.89	0.79	1	12.2	14
1	1031	2021-10-21 10:08:35	1	0	24.2188	78	3	male	1	1.6	62	No	Married	1	#NULL!	0	Respiratory System	0	0	0	0	0	0	0	1	62	1	32	#NULL!	7.43	5.24	70.4	149	2	2	4.85	2	44.6	1.59	359	3	0.28	7.8	#NULL!	#NULL!	#NULL!	#NULL!	10.3	12
1	1136	2021-10-22 08:56:29	1	0	20.8889	79	3	female	2	1.5	47	No	Married	1	#NULL!	0	Blood System	4	0	1	0	0	0	0	0	65	1	43	#NULL!	3.61	1.86	51.4	142	2	1	4.79	2	45	1.06	153	2	0.18	11.7	6.88	4.27	1.1	#NULL!	5.9	26
1	1014	2021-10-22 09:11:19	1	0	25	69	1	male	1	1.6	64	No	Married	1	#NULL!	0	Digestive System	0	1	1	0	0	1	0	1	73	2	45	#NULL!	6.35	4.22	66.6	133	2	2	4.12	2	39.8	1.14	207	2	0.16	7.9	#NULL!	#NULL!	#NULL!	#NULL!	16	16
1	1128	2021-10-22 09:38:17	1	0	22.8928	68	1	male	1	1.55	55	No	Married	1	#NULL!	0	Digestive System	0	0	0	0	0	0	0	0	65	1	41	#NULL!	6.45	5.42	84	161	2	2	5.26	2	49	0.76	213	2	0.2	9.2	3.1	0.54	1.05	1	13.7	24
1	1169	2021-10-22 09:38:17	2	1	16.5289	74	2	female	2	1.65	45	No	Married	1	#NULL!	0	Digestive System	0	0	0	0	0	0	0	0	65	1	32	75	8.85	6.22	70.2	126	2	1	4.23	2	38.6	2.07	363	3	0.32	8.8	3.92	0.96	0.93	1	8.2	11
1	1023	2021-10-22 11:43:37	1	0	22.5827	70	1	female	2	1.63	60	No	Married	1	#NULL!	0	Respiratory System	0	1	1	0	0	0	0	0	82	2	45	#NULL!	5.61	3.4	60.5	157	2	1	5.27	2	48.1	1.82	261	2	0.25	9.5	5.24	1.88	1.11	#NULL!	10.9	18
1	1207	2021-10-22 13:32:08	2	1	19.8347	65	1	male	1	1.65	54	No	Married	1	#NULL!	0	Respiratory System	4	0	0	0	0	0	0	0	62	1	35	#NULL!	4.35	2.54	58.5	140	2	1	4.2	2	40.8	1.34	159	2	0.15	9.5	5.58	1.59	1.5	#NULL!	2.5	20
1	1130	2021-10-23 10:03:24	2	0	24.8777	76	3	male	1	1.54	59	No	Married	1	#NULL!	0	Respiratory System	4	0	1	0	1	0	0	0	68	1	39	#NULL!	6.32	4.34	68.7	172	2	1	5.53	2	53	1.34	123	2	0.14	11.2	2.97	1.16	1.05	1	25.2	19
1	998	2021-10-23 11:00:41	1	1	20.4444	81	4	male	1	1.5	46	No	Other	3	#NULL!	0	Reproductive System	4	0	0	0	0	0	0	0	52	1	31	156	4.08	2.21	54.1	90	1	1	2.84	1	27	1.39	111	2	0.1	9.1	4.24	1.58	0.78	1	8.2	14
1	1235	2021-10-23 20:28:57	2	1	#NULL!	79	3	female	2	1.55	#NULL!	Yes	Married	1	#NULL!	0	Urinary System	4	0	1	0	0	0	0	0	61	1	28	#NULL!	18.94	17.36	91.6	96	1	2	3.21	1	33	1.01	24	1	0.03	12.4	#NULL!	#NULL!	#NULL!	#NULL!	8.1	27
1	1148	2021-10-24 09:25:43	2	0	25.2174	68	1	male	1	1.63	67	No	Widowed	0	#NULL!	0	Respiratory System	0	0	0	0	0	0	0	1	65	1	38	198	5.68	3.72	65.4	143	2	1	4.9	2	44.3	1.48	152	2	0.13	8.8	7.52	1.67	0.92	#NULL!	10.9	17
1	991	2021-10-24 09:37:16	1	0	27.4587	73	2	male	1	1.78	87	No	Married	1	#NULL!	0	Endocrine System	4	0	0	0	0	0	0	0	63	1	39	170	5.79	4.57	79	167	2	2	5.1	2	49	0.68	155	2	0.16	10.2	3.43	1.15	0.69	1	16.5	20
1	1160	2021-10-24 11:25:28	1	1	#NULL!	81	4	female	2	1.55	#NULL!	Yes	Widowed	0	#NULL!	0	Digestive System	0	0	1	0	1	1	0	0	55	1	27	80	12.6	11.58	91.8	97	1	2	2.97	1	29	0.41	196	2	0.2	10	2.75	1.41	0.11	1	67.7	131
1	1050	2021-10-24 11:33:57	2	1	21.0279	78	3	female	2	1.43	43	No	Married	1	#NULL!	0	Reproductive System	4	0	0	0	0	0	0	0	59	1	27	95	7.24	4.89	67.6	95	1	1	3.33	1	29.7	1.85	455	3	0.36	7.9	#NULL!	#NULL!	#NULL!	#NULL!	7	13
1	1254	2021-10-25 08:32:01	2	0	24.974	75	2	male	1	1.55	60	No	Married	1	#NULL!	0	Hematologic System	4	0	0	0	0	0	0	0	66	1	39	#NULL!	4.11	2.73	66.5	153	2	2	4.66	2	46.1	0.73	155	2	0.15	9.9	#NULL!	#NULL!	#NULL!	#NULL!	14.9	20
1	1212	2021-10-25 09:40:38	1	1	19.563	68	1	female	2	1.55	47	No	Married	1	#NULL!	0	Reproductive System	0	1	1	0	0	0	0	0	72	2	41	#NULL!	5.54	3.78	68.2	133	2	1	4.58	2	41.1	1.45	247	2	0.28	11.3	#NULL!	#NULL!	#NULL!	#NULL!	5.7	20
1	1134	2021-10-26 08:48:10	2	0	22.0317	65	1	female	2	1.58	55	No	Other	3	#NULL!	0	Respiratory System	0	0	0	0	0	0	0	0	72	2	43	#NULL!	4.16	2.68	64.6	148	2	1	4.76	2	43.7	1.16	197	2	0.21	10.4	#NULL!	#NULL!	#NULL!	#NULL!	8.9	36
1	1168	2021-10-26 08:54:54	2	1	19.487	67	1	male	1	1.68	55	No	Married	1	#NULL!	0	Respiratory System	0	0	0	0	0	0	0	0	58	1	34	#NULL!	5.91	4.23	71.6	119	1	2	3.76	1	35.3	1.18	244	2	0.26	10.8	#NULL!	#NULL!	#NULL!	#NULL!	2.5	17
1	1119	2021-10-26 09:46:31	2	0	21.4844	73	2	male	1	1.6	55	No	Married	1	#NULL!	0	Respiratory System	4	0	1	0	1	0	0	1	58	1	32	#NULL!	6.16	5.03	81.6	132	2	2	4.27	2	38.7	0.68	160	2	0.15	9.5	#NULL!	#NULL!	#NULL!	#NULL!	9.2	10
1	1156	2021-10-26 10:03:30	2	0	23.0112	66	1	female	2	1.56	56	No	Married	1	#NULL!	0	Respiratory System	0	0	1	0	0	0	0	0	71	2	45	#NULL!	0	2.74	54.2	143	2	1	14.9	2	43.4	1.91	281	2	0.3	10.6	4.54	1.59	1.05	1	9.3	17
1	1121	2021-10-26 10:11:07	1	0	27.5482	79	3	male	1	1.65	75	No	Married	1	#NULL!	0	Reproductive System	0	0	1	1	1	1	0	0	73	2	39	199	5.89	3.6	61.1	172	2	1	5.79	2	53	1.58	169	2	0.17	10.3	3.53	1.68	0.75	1	12	40
1	1178	2021-10-27 09:12:05	1	0	24.093	73	2	male	1	1.68	68	No	Married	1	#NULL!	0	Blood System	4	0	0	0	0	0	0	0	65	1	36	#NULL!	3.78	2.37	62.7	144	2	1	4.92	2	45	0.93	151	2	0.16	10.7	3.57	1.21	0.89	1	4.3	20
1	1246	2021-10-27 10:52:55	1	0	27.5482	68	1	male	1	1.65	75	No	Married	1	#NULL!	0	Digestive System	0	0	1	0	0	0	0	1	67	1	42	#NULL!	5.58	3.15	56.6	173	2	1	4.92	2	49.9	1.81	101	2	0.09	9	5.49	2.72	0.77	#NULL!	12.6	32
1	1223	2021-10-28 08:48:46	1	1	18.3115	65	1	female	2	1.45	38.5	No	Married	1	#NULL!	0	Reproductive System	0	1	0	0	0	0	0	0	73	2	41	#NULL!	5.06	3.38	66.8	107	1	1	3.23	1	32.3	1.19	177	2	0.15	8.2	#NULL!	#NULL!	#NULL!	#NULL!	4.3	25
1	1243	2021-10-28 09:38:57	2	0	24.8889	77	3	female	2	1.5	56	No	Other	3	#NULL!	0	Digestive System	0	0	0	0	0	0	0	0	62	1	41	#NULL!	6.48	4.29	66.2	143	2	1	4.65	2	45	1.47	210	2	0.22	10.2	#NULL!	#NULL!	#NULL!	#NULL!	6.2	18
1	1222	2021-10-28 09:56:19	1	1	20.5693	66	1	male	1	1.65	56	No	Married	1	#NULL!	0	Digestive System	4	1	0	0	0	0	0	0	65	1	39	#NULL!	0	2.22	66.4	137	2	2	1	1	40.1	0.63	105	2	0.11	10.3	4.18	1.26	0.91	1	7.3	7
1	1126	2021-10-28 10:50:53	1	0	26.9531	66	1	female	2	1.6	69	No	Married	1	#NULL!	0	Respiratory System	0	1	1	0	0	0	0	0	73	2	34	#NULL!	4.77	2.57	53.7	138	2	1	4.12	2	40.4	1.62	92	1	0.1	10.5	4.33	1.33	1.35	0	24.6	67
1	1194	2021-10-28 11:52:00	1	1	18.75	73	2	male	1	1.6	48	No	Married	1	#NULL!	0	Respiratory System	0	0	0	0	0	0	0	0	61	1	38	#NULL!	6.31	3.79	60	140	2	1	4.41	2	43	1.45	197	2	0.22	10.9	#NULL!	#NULL!	#NULL!	#NULL!	11.2	40
1	1114	2021-10-28 14:59:29	2	0	22.8329	81	4	male	1	1.58	57	No	Married	1	#NULL!	0	Respiratory System	4	0	0	0	0	0	0	0	66	1	41	#NULL!	10.06	5.82	57.8	148	2	1	4.41	2	44	2.3	285	2	0.3	10.6	#NULL!	#NULL!	#NULL!	#NULL!	7.3	28
1	1239	2021-10-29 08:31:22	1	1	15.2249	66	1	male	1	1.7	44	No	Married	1	#NULL!	0	Digestive System	4	0	0	0	0	0	0	0	73	2	36	238	7.58	3.88	51.3	119	1	1	3.67	1	36.6	2.36	566	3	0.46	8.1	5.38	1.59	1.53	#NULL!	21.6	27
1	1152	2021-10-29 08:51:34	2	1	18.6709	82	4	female	2	1.62	49	No	Married	1	#NULL!	0	Digestive System	4	1	1	0	1	0	0	0	67	1	39	#NULL!	7.7	5.32	69	136	2	1	4.36	2	40.9	1.68	215	2	0.21	9.9	#NULL!	#NULL!	#NULL!	#NULL!	18.8	17
1	1255	2021-10-29 09:51:01	2	1	19.1406	65	1	male	1	1.6	49	No	Married	1	#NULL!	0	Digestive System	0	1	0	0	0	0	0	0	62	1	38	173	3.77	2.22	58.8	111	1	1	4.03	2	34	0.97	194	2	0.19	9.7	3.57	0.61	0.84	1	6.2	31
1	1013	2021-10-29 09:51:22	2	1	19.8413	79	3	male	1	1.68	56	No	Married	1	#NULL!	0	Reproductive System	4	0	0	0	0	0	0	0	71	2	40	#NULL!	8.69	6.03	69.5	135	2	2	3.74	1	39.4	1.83	297	2	0.29	9.9	#NULL!	#NULL!	#NULL!	#NULL!	4.2	16
1	1054	2021-10-29 10:07:36	2	1	#NULL!	74	2	female	2	1.45	#NULL!	Yes	Married	1	#NULL!	0	Digestive System	4	1	0	0	0	0	0	0	71	2	38	173	10.5	8.46	80.6	131	2	2	4.57	2	40.1	1.22	345	3	0.39	11.3	#NULL!	#NULL!	#NULL!	#NULL!	27.4	24
1	1176	2021-10-29 10:11:46	1	1	26.079	77	3	male	1	1.65	71	No	Married	1	#NULL!	0	Digestive System	4	0	0	1	0	0	0	0	62	1	31	115	3.5	1.76	50.5	96	1	1	2.78	1	28.7	1.18	145	2	0.15	10.3	#NULL!	#NULL!	#NULL!	#NULL!	6.5	25
1	1101	2021-10-29 11:26:32	1	0	21.7776	69	1	male	1	1.78	69	No	Married	1	#NULL!	0	Respiratory System	4	0	1	0	0	0	0	0	66	1	37	#NULL!	4.4	2.97	67.6	130	2	1	4.13	2	38.5	0.93	173	2	0.15	8.6	5.02	1.58	1.01	1	9.4	13
1	1240	2021-10-30 09:45:58	2	1	17.301	87	5	male	1	1.7	50	No	Married	1	#NULL!	0	Respiratory System	0	0	0	0	0	0	0	0	72	2	27	#NULL!	1.36	0.83	60.4	46	1	1	1.32	1	14.4	0.33	225	2	0.25	11.2	#NULL!	#NULL!	#NULL!	#NULL!	8.8	11
1	1236	2021-10-30 10:25:02	2	0	21.0828	74	2	male	1	1.54	50	No	Married	1	#NULL!	0	Reproductive System	0	0	0	0	0	0	0	0	64	1	38	#NULL!	3	2.83	57.4	143	2	1	4	1	41.4	1.69	256	2	0.25	9.6	5.5	1.61	1.48	#NULL!	11.1	16
1	1228	2021-10-31 08:52:07	1	0	23.5078	85	4	male	1	1.65	64	No	Married	1	#NULL!	0	Reproductive System	0	0	1	1	1	0	0	0	65	1	36	#NULL!	2.1	6.14	71.8	163	2	2	3.1	1	50.9	1.32	134	2	0.14	10.2	#NULL!	#NULL!	#NULL!	#NULL!	11.7	15
1	1229	2021-10-31 09:22:03	1	1	17.0068	69	1	male	1	1.68	48	No	Married	1	#NULL!	0	Digestive System	4	0	1	0	0	0	0	1	66	1	35	153	4.91	3.8	77.2	141	2	2	4.19	2	41.1	0.73	219	2	0.27	12.3	#NULL!	#NULL!	#NULL!	#NULL!	188.3	236
1	1224	2021-10-31 09:47:36	2	0	28.7197	74	2	male	1	1.7	83	No	Married	1	#NULL!	0	Respiratory System	4	0	1	0	0	0	0	0	73	2	41	#NULL!	9.06	5.93	65.6	159	2	1	4.71	2	47.2	2.35	231	2	0.21	9.2	5.43	1.66	1.02	#NULL!	11.9	19
1	1137	2021-10-31 09:56:02	1	0	24.8889	72	2	female	2	1.5	56	No	Married	1	#NULL!	0	Digestive System	0	0	1	0	0	0	0	0	59	1	36	#NULL!	34.8	3.89	59.2	137	2	1	111.9	2	42.5	1.78	190	2	0.21	11.2	#NULL!	#NULL!	#NULL!	#NULL!	9.5	16
1	1338	2021-10-31 10:12:52	1	0	23.8751	74	2	male	1	1.65	65	No	Married	1	#NULL!	0	Digestive System	4	1	1	1	0	0	0	0	65	1	38	#NULL!	4.4	3	68.1	106	1	1	3.19	1	31.6	0.99	138	2	0.15	11.1	#NULL!	#NULL!	#NULL!	#NULL!	12.3	37
1	1162	2021-10-31 11:56:45	1	1	18.2563	76	3	male	1	1.57	45	No	Married	1	#NULL!	0	Digestive System	0	0	0	0	0	1	0	0	60	1	32	149.4	3.44	2.39	69.5	59	1	2	3.07	1	22.6	0.7	206	2	0.24	11.5	3.17	0.71	1.56	0	14.3	12
1	1349	2021-11-01 08:11:06	2	1	19.563	80	3	female	2	1.55	47	No	Married	1	#NULL!	0	Respiratory System	0	1	0	0	0	0	0	0	59	1	37	#NULL!	5.52	3.05	55.2	146	2	1	4.88	2	46	1.97	210	2	0.25	12	7.58	2.53	0.99	#NULL!	4.1	9
1	1118	2021-11-01 09:27:50	2	0	23.03	69	1	male	1	1.68	65	No	Other	3	#NULL!	0	Urinary System	0	0	1	0	0	0	0	0	69	2	45	#NULL!	4.86	2.72	56.1	158	2	1	5.32	2	47.8	1.63	168	2	0.16	9.4	#NULL!	#NULL!	#NULL!	#NULL!	11.8	40
1	1153	2021-11-02 10:15:56	1	0	24.1633	74	2	male	1	1.75	74	No	Married	1	#NULL!	0	Digestive System	4	0	1	0	1	0	0	0	70	2	41	367	5.91	4.3	72.9	139	2	2	4.56	2	41.9	0.99	229	2	0.22	9.6	4.5	2.13	1.47	1	9.9	29
1	1182	2021-11-02 11:49:03	1	1	17.6309	65	1	male	1	1.65	48	No	Married	1	#NULL!	0	Respiratory System	0	0	0	0	0	0	0	0	72	2	45	#NULL!	5.89	3.14	53.3	170	2	1	5.38	2	51.2	2.16	218	2	0.22	10	4.95	1.3	1.18	0	13.8	33
1	1088	2021-11-03 11:25:18	2	0	21.0938	71	2	female	2	1.6	54	No	Married	1	#NULL!	0	Respiratory System	0	0	0	0	0	0	0	0	71	2	43	#NULL!	5.2	3.12	56.6	154	2	1	4.1	2	44.8	1.98	180	2	0.18	10.1	5.72	3.31	1.18	#NULL!	9.8	189
1	1346	2021-11-04 08:35:20	1	1	#NULL!	80	3	male	1	1.68	#NULL!	Yes	Married	1	#NULL!	1	Digestive System	0	0	1	0	0	0	0	0	56	1	29	#NULL!	1	1.05	50	116	1	1	0	1	33.3	0.62	108	2	0.12	10.8	2.41	0.66	0.68	1	5.8	16
1	1321	2021-11-04 09:05:08	1	0	23.8087	76	3	male	1	1.69	68	No	Married	1	#NULL!	0	Respiratory System	0	0	1	0	0	0	0	1	64	1	34	#NULL!	7.53	4.88	64.7	135	2	1	4.75	2	41	1.69	291	2	0.29	9.9	4.69	1.62	1.2	0	11.2	20
1	1051	2021-11-04 09:49:10	1	1	19.5006	74	2	female	2	1.45	41	No	Other	3	#NULL!	0	Reproductive System	0	0	0	0	0	0	0	1	71	2	38	168	8.03	6.9	85.9	90	1	2	2.56	1	27.8	0.43	54	1	0.07	12.3	#NULL!	#NULL!	#NULL!	#NULL!	6.7	15
1	1356	2021-11-04 10:14:40	1	0	23.8281	74	2	male	1	1.6	61	No	Married	1	#NULL!	0	Respiratory System	0	0	1	0	0	0	0	0	64	1	38	#NULL!	5.72	4.15	72.6	138	2	2	4.53	2	42	1.09	207	2	0.18	8.6	#NULL!	#NULL!	#NULL!	#NULL!	7.5	21
1	1172	2021-11-04 11:10:53	1	1	20	74	2	female	2	1.5	45	No	Married	1	#NULL!	0	Digestive System	4	0	0	0	0	0	0	0	57	1	29	#NULL!	42.4	1.86	71.4	87	1	2	2.4	1	26.7	0.49	74	1	0.06	9.1	#NULL!	#NULL!	#NULL!	#NULL!	23	12
1	1232	2021-11-05 08:54:19	1	0	30.9304	72	2	male	1	1.78	98	No	Married	1	#NULL!	0	Urinary System	4	0	1	0	1	0	0	0	59	1	37	#NULL!	4.72	2.5	52.8	145	2	1	4.38	2	44	1.8	144	2	0.17	11.9	5.05	1.75	0.98	1	10.8	17
1	1339	2021-11-05 09:18:27	1	1	19.2672	87	5	male	1	1.72	57	No	Married	1	#NULL!	0	Hematologic System	4	0	0	0	0	0	0	0	67	1	37	140	2.1	2.78	53.2	145	2	2	3.1	1	43.5	0.68	89	1	0.1	11.4	4.27	1.19	0.76	1	14.5	11
1	1238	2021-11-05 14:21:19	2	0	21.83	85	4	male	1	1.63	58	No	Divorced	4	#NULL!	0	Respiratory System	0	0	0	0	0	0	0	1	55	1	31	#NULL!	3.1	4.97	74.1	131	2	2	3.1	1	38.8	0.86	319	3	0.3	9.5	4.32	0.58	1.33	0	8.4	11
1	1175	2021-11-06 08:42:05	2	1	16.2982	72	2	male	1	1.68	46	No	Married	1	#NULL!	1	Digestive System	4	0	0	0	0	0	0	1	65	1	30	94	10.7	9.79	91.4	88	1	2	2.93	1	28	0.35	157	2	0.17	10.5	#NULL!	#NULL!	#NULL!	#NULL!	9	18
1	1242	2021-11-06 09:11:49	2	1	17.7154	73	2	male	1	1.68	50	No	Married	1	#NULL!	0	Digestive System	0	0	0	0	0	1	0	0	76	2	38	#NULL!	8.57	7.67	89.5	132	2	2	4.37	2	39	0.47	220	2	0.18	8	#NULL!	#NULL!	#NULL!	#NULL!	27	16
1	1360	2021-11-06 10:35:15	2	1	19.4674	69	1	male	1	1.65	53	No	Married	1	#NULL!	0	Respiratory System	0	0	1	1	0	0	0	0	60	1	36	#NULL!	5.36	3.17	59.2	113	1	1	3.44	1	33.1	1.55	142	2	0.16	10.9	3.74	0.48	0.88	1	8.3	12
1	1084	2021-11-07 10:18:02	2	0	21.2279	67	1	female	2	1.55	51	No	Married	1	#NULL!	0	Digestive System	0	0	0	0	0	0	0	0	65	1	35	#NULL!	3.94	1.87	47.4	138	2	1	4.4	2	43.1	1.09	172	2	0.17	10	#NULL!	#NULL!	#NULL!	#NULL!	6.6	24
1	1237	2021-11-08 09:54:59	1	1	19.4674	92	5	male	1	1.65	53	No	Other	3	#NULL!	0	Urinary System	0	0	1	0	0	0	0	1	58	1	28	#NULL!	6.24	5.18	83.1	81	1	2	4	1	28	0.47	162	2	0.15	9.1	2.87	0.54	1.11	1	11	8
1	1265	2021-11-08 11:20:00	2	0	24.6094	72	2	female	2	1.6	63	No	Married	1	#NULL!	0	Digestive System	4	1	1	0	0	0	0	0	69	2	37	#NULL!	5.31	2.46	46.5	151	2	1	4.67	2	46.3	2.06	212	2	0.2	9.5	7.18	1.41	0.93	#NULL!	13	17
1	1227	2021-11-09 09:21:28	1	1	19.1001	81	4	male	1	1.65	52	No	Other	3	#NULL!	0	Respiratory System	0	0	0	0	0	0	0	1	66	1	33	#NULL!	9.05	7.41	81.9	152	2	2	4.91	2	46	0.65	254	2	0.27	10.5	3.79	1	1.19	0	18.7	17
1	1354	2021-11-09 09:37:33	2	0	21.3333	74	2	female	2	1.5	48	No	Married	1	#NULL!	0	Digestive System	0	1	0	0	0	0	0	0	66	1	37	#NULL!	3.21	1.7	53.1	124	2	1	3.68	1	37.3	1.17	60	1	0.08	12.3	#NULL!	#NULL!	#NULL!	#NULL!	17	12
1	1310	2021-11-09 09:52:58	1	0	21.4844	68	1	female	2	1.6	55	No	Married	1	#NULL!	0	Reproductive System	0	1	0	0	0	0	0	0	75	2	46	#NULL!	5.94	3.97	66.8	148	2	1	4.51	2	44.1	1.62	196	2	0.17	8.7	5.89	1.31	1.31	#NULL!	5.2	17
1	1252	2021-11-09 10:32:52	2	0	29.0533	68	1	male	1	1.68	82	No	Other	3	#NULL!	0	Reproductive System	4	0	0	0	0	0	0	0	64	1	37	208	1	7.83	80	74	1	2	5.9	2	23	1.44	65	1	0.07	10.1	5.35	1.91	1.18	#NULL!	6.8	17
1	1290	2021-11-09 11:20:09	1	0	24.1415	69	1	female	2	1.55	58	No	Married	1	#NULL!	0	Respiratory system	0	1	1	1	0	0	0	0	59	1	36	#NULL!	5.47	2.45	44.8	130	2	1	4.11	2	38.3	2.37	190	2	0.21	11	5.08	1.29	0.81	1	7.6	25
1	1344	2021-11-10 09:13:30	1	0	24.5243	74	2	female	2	1.59	62	No	Married	1	#NULL!	0	Reproductive System	0	0	1	0	0	0	0	0	67	1	43	210	17.7	2.64	50.6	152	2	1	3.3	1	44.7	2.19	161	2	0.16	9.9	#NULL!	#NULL!	#NULL!	#NULL!	15.1	14
1	1325	2021-11-10 09:35:38	1	1	17.6471	79	3	male	1	1.7	51	No	Married	1	#NULL!	0	Reproductive System	0	0	0	0	0	0	0	0	60	1	30	#NULL!	6.32	4.4	69.6	105	1	2	3.07	1	31.3	1.23	327	3	0.29	8.9	#NULL!	#NULL!	#NULL!	#NULL!	4.7	38
1	1421	2021-11-10 10:01:43	2	1	19.3625	88	5	male	1	1.67	54	No	Married	1	#NULL!	0	Respiratory system	4	0	0	0	0	0	0	0	72	2	44	#NULL!	4.19	2.4	57.4	141	2	1	4.26	2	41.5	1.31	153	2	0.15	9.7	#NULL!	#NULL!	#NULL!	#NULL!	11.4	11
1	1262	2021-11-10 10:24:04	2	1	16.6493	81	4	female	2	1.55	40	No	Married	1	#NULL!	0	Respiratory System	0	0	1	0	1	0	0	0	59	1	34	#NULL!	8.3	7.05	84.9	113	1	2	3.8	1	36	0.64	259	2	0.26	10	4.89	2.42	0.93	1	7.1	11
1	1387	2021-11-10 10:44:37	2	1	16.1712	73	2	female	2	1.45	34	No	Married	1	#NULL!	0	Digestive System	0	0	0	0	0	0	0	1	64	1	38	140	7.55	5.45	72.2	133	2	2	4.49	2	41.9	1.61	241	2	0.25	10.6	4.82	2.53	0.73	1	8.6	17
1	1272	2021-11-11 09:07:06	2	0	22.0604	67	1	female	2	1.55	53	No	Married	1	#NULL!	0	Other	4	0	0	0	0	0	0	0	71	2	39	#NULL!	3.85	3.15	82	139	2	2	4.52	2	41.8	0.65	107	2	0.11	10.1	#NULL!	#NULL!	#NULL!	#NULL!	12.5	14
1	1250	2021-11-11 09:31:56	1	0	25.0995	68	1	male	1	1.67	70	No	Married	1	#NULL!	0	Reproductive System	4	0	1	0	0	0	0	0	67	1	41	269	5.57	4.3	77.3	141	2	2	4.46	2	41.5	0.67	154	2	0.18	11.3	5.74	2.01	1.61	#NULL!	11.5	22
1	1374	2021-11-11 10:05:10	1	0	20.8117	71	2	female	2	1.55	50	No	Married	1	#NULL!	0	Reproductive System	0	1	0	0	0	0	0	0	68	1	42	230	5.41	3.46	64	143	2	1	4.73	2	43.7	1.55	268	2	0.27	10.1	6.72	1.55	1.3	#NULL!	10.2	11
1	1375	2021-11-11 10:22:18	1	0	27.0416	79	3	male	1	1.72	80	No	Married	1	#NULL!	0	Reproductive System	4	0	1	0	1	0	0	0	61	1	35	162	6.1	3.51	63.7	113	1	1	3.1	1	34.1	1.31	152	2	0.14	9	4.94	1.04	0.89	1	9.7	11
1	1423	2021-11-12 08:26:05	1	0	24.8777	76	3	male	1	1.54	59	No	Married	1	#NULL!	0	Respiratory System	4	0	1	0	1	0	0	0	67	1	37	#NULL!	6.5	4.43	68.1	177	2	1	5.8	2	55	1.39	181	2	0.19	10.6	3.61	0.45	1.3	0	20.4	19
1	1363	2021-11-12 08:30:25	1	1	15.5709	66	1	male	1	1.7	45	No	Married	1	#NULL!	0	Digestive System	4	0	0	0	0	0	0	0	71	2	38	228	7.66	3.42	44.7	117	1	1	3.6	1	35.8	2.48	419	3	0.35	8.5	5.83	1.27	1.79	#NULL!	13.8	30
1	1411	2021-11-12 10:40:53	2	0	20.8117	73	2	male	1	1.55	50	No	Married	1	#NULL!	0	Digestive System	0	1	0	0	0	0	0	0	61	1	39	#NULL!	3.49	1.2	34.3	120	1	1	3.62	1	37	2.07	137	2	0.12	8.9	#NULL!	#NULL!	#NULL!	#NULL!	15.7	9
1	1267	2021-11-12 12:02:22	1	1	19.5965	81	4	male	1	1.66	54	No	Married	1	#NULL!	0	Urinary System	0	1	0	0	0	0	0	0	64	1	40	#NULL!	6.13	4.13	67.5	136	2	1	4.37	2	40.6	1.32	221	2	0.22	9.8	#NULL!	#NULL!	#NULL!	#NULL!	5	12
1	1298	2021-11-12 14:22:52	1	0	21.6296	71	2	male	1	1.76	67	No	Widowed	0	#NULL!	0	Respiratory System	0	0	0	0	1	0	0	0	61	1	38	#NULL!	4.65	3.59	77.2	131	2	2	4.12	2	38.8	0.66	192	2	0.21	10.9	#NULL!	#NULL!	#NULL!	#NULL!	12.2	5
1	1359	2021-11-12 14:45:23	1	0	22.4913	74	2	male	1	1.7	65	No	Married	1	#NULL!	0	Respiratory System	0	0	0	0	0	0	0	0	67	1	38	#NULL!	4.09	2.66	65.1	144	2	1	4.64	2	43.1	0.98	232	2	0.21	8.9	5.12	0.85	1.19	1	9.5	12
1	1342	2021-11-13 08:36:05	1	1	#NULL!	66	1	female	2	1.6	#NULL!	Yes	Married	1	#NULL!	0	Digestive System	4	0	0	0	0	0	0	0	60	1	23	37	8.8	7.9	89.8	122	2	2	4.4	2	37.9	0.58	162	2	0.15	9	2.51	0.95	0.42	1	25.3	10
1	1372	2021-11-13 09:30:35	1	0	27.7323	69	1	male	1	1.73	83	No	Married	1	#NULL!	0	Digestive System	0	0	1	0	0	0	0	0	85	2	52	#NULL!	6.29	3.57	56.7	134	2	1	3.98	1	39	2.24	268	2	0.2	7.6	#NULL!	#NULL!	#NULL!	#NULL!	7.6	14
1	1300	2021-11-13 13:55:28	1	0	23.4224	65	1	female	2	1.49	52	No	Married	1	#NULL!	0	Reproductive System	0	0	1	1	0	0	0	0	72	2	41	#NULL!	5.32	3.34	62.9	121	2	1	4.37	2	36.7	1.51	301	3	0.31	10.4	5.83	1.76	0.99	#NULL!	9.7	16
1	1341	2021-11-14 08:38:57	1	1	18.3655	71	2	male	1	1.65	50	No	Married	1	#NULL!	0	Digestive System	4	0	0	0	0	0	0	0	64	1	34	88	5.17	3.47	67	116	1	2	4.11	2	34.8	0.59	51	1	0.05	10.4	2.54	0.71	0.81	1	40.8	25
1	1426	2021-11-14 08:59:15	2	0	23.8751	69	1	male	1	1.65	65	No	Married	1	#NULL!	0	Digestive System	0	1	1	0	0	1	0	0	66	1	41	#NULL!	4.65	2.86	61.6	118	1	1	3.55	1	34.8	1.04	217	2	0.17	7.7	#NULL!	#NULL!	#NULL!	#NULL!	11.7	12
1	1412	2021-11-14 09:06:12	1	0	23.4375	80	3	male	1	1.6	60	No	Widowed	0	#NULL!	0	Urinary System	0	0	1	1	0	0	0	0	65	1	38	195	7.7	9.94	80.5	131	2	2	3.1	1	40.3	1.58	827	3	0.69	8.3	3.69	1.2	0.79	1	15.2	19
1	1402	2021-11-14 09:39:16	1	1	19.563	71	2	female	2	1.55	47	No	Widowed	0	#NULL!	0	Digestive System	0	1	0	0	0	0	0	0	73	2	42	180	2.42	1.49	61.6	147	2	1	4.38	2	43.7	0.56	98	1	0.09	9.1	#NULL!	#NULL!	#NULL!	#NULL!	34.1	21
1	1424	2021-11-14 10:11:40	2	1	15.427	90	5	female	2	1.65	42	No	Widowed	0	#NULL!	0	Respiratory System	0	1	0	0	0	0	0	0	62	1	35	151	7.49	6.05	80.7	138	2	2	4.41	2	43.7	0.94	192	2	0.23	11.9	3.63	0.54	1.33	0	34.8	284
1	1388	2021-11-14 10:19:07	2	0	26.3702	66	1	male	1	1.57	65	No	Married	1	#NULL!	0	Respiratory System	4	0	0	0	0	0	0	0	57	1	36	#NULL!	3.9	2.33	59.9	128	2	1	4.04	2	38.8	1.08	141	2	0.14	9.6	5.07	1.16	1.21	0	5.8	14
1	1377	2021-11-15 09:08:30	1	0	23.3844	73	2	male	1	1.68	66	No	Married	1	#NULL!	0	Blood System	4	0	0	0	0	0	0	0	69	2	43	#NULL!	2.9	1.62	56.2	161	2	1	5.26	2	47.8	0.88	172	2	0.19	10.7	#NULL!	#NULL!	#NULL!	#NULL!	14	33
1	1366	2021-11-15 09:50:38	1	0	20.5693	68	1	male	1	1.65	56	No	Married	1	#NULL!	0	Digestive System	0	0	0	0	0	0	0	0	58	1	28	#NULL!	7.34	4.12	56.2	121	2	1	3.93	1	37.6	1.91	308	3	0.36	11.7	#NULL!	#NULL!	#NULL!	#NULL!	49.4	45
1	1379	2021-11-15 10:10:31	1	1	19.563	68	1	female	2	1.55	47	No	Married	1	#NULL!	0	Reproductive System	0	1	0	0	0	0	0	0	69	2	42	#NULL!	6.26	4.12	65.9	127	2	1	4.27	2	38.7	1.76	279	2	0.25	9.1	#NULL!	#NULL!	#NULL!	#NULL!	12.8	20
1	1362	2021-11-15 11:44:11	2	1	19.1001	65	1	male	1	1.65	52	No	Married	1	#NULL!	0	Respiratory System	4	0	0	0	0	0	0	0	65	1	39	#NULL!	3.3	1.67	50.4	148	2	1	4.37	2	42.3	1.28	170	2	0.17	10	6.32	0.88	1.83	#NULL!	6.4	16
1	1161	2021-11-16 09:18:13	2	1	18.7783	71	2	male	1	1.68	53	No	Married	1	#NULL!	0	Respiratory System	0	0	0	0	1	0	0	0	61	1	33	#NULL!	5.59	3.87	69.2	137	2	2	4.78	2	41	1.04	208	2	0.21	10	5.22	1.54	0.83	#NULL!	4.1	20
1	1219	2021-11-16 10:39:10	1	0	24.7325	77	3	female	2	1.45	52	No	Widowed	0	#NULL!	0	Respiratory System	0	0	1	0	1	0	0	0	69	2	40	#NULL!	5.6	3.64	65	168	2	1	5.98	2	53	1.43	149	2	0.16	10.7	3.9	1.06	1.34	0	12.4	15
1	1278	2021-11-17 08:44:21	1	1	19.8189	83	4	female	2	1.49	44	No	Married	1	#NULL!	0	Reproductive System	4	0	1	0	0	0	0	0	66	1	39	#NULL!	5.27	3.2	60.7	81	1	1	2.63	1	25	1.45	219	2	0.2	9.2	3.91	0.92	1.28	0	5.7	12
1	1327	2021-11-17 09:21:29	1	0	25.8065	81	4	female	2	1.55	62	No	Widowed	0	#NULL!	0	Respiratory system	0	0	1	0	1	1	0	0	67	1	34	#NULL!	7.45	5.24	70.3	120	1	2	4.23	2	39	1.36	210	2	0.21	9.9	4.26	1.46	0.93	1	10.2	18
1	1291	2021-11-17 09:54:00	1	0	28.125	75	2	male	1	1.6	72	No	Other	3	#NULL!	0	Reproductive system	0	0	0	1	0	0	0	1	58	1	32	#NULL!	3.29	1.96	59.8	118	1	1	3.64	1	35	1	61	1	0.07	12.1	#NULL!	#NULL!	#NULL!	#NULL!	27	20
1	1271	2021-11-17 14:57:39	1	1	17.2635	88	5	male	1	1.65	47	No	Unmarried	#NULL!	#NULL!	0	Reproductive	0	0	0	0	0	0	0	0	49	1	23	#NULL!	6.62	6.11	92.1	86	1	2	2.92	1	26.5	0.39	147	2	0.12	7.9	#NULL!	#NULL!	#NULL!	#NULL!	18.3	15
1	1287	2021-11-18 10:31:15	2	1	20.3125	79	3	male	1	1.6	52	No	Married	1	#NULL!	0	Other	4	0	0	0	0	0	0	0	74	2	45	#NULL!	5.22	3.13	60	178	2	1	5.25	2	52.5	1.56	130	2	0.16	12.1	#NULL!	#NULL!	#NULL!	#NULL!	24.4	53
1	1111	2021-11-18 15:03:11	1	0	22.3214	68	1	male	1	1.68	63	No	Married	1	#NULL!	0	Respiratory System	4	0	0	0	0	1	0	0	64	1	35	102	4.02	2.24	55.5	96	1	1	2.86	1	29.4	0.99	86	1	0.09	9.9	4.11	1.44	0.78	1	7.4	20
1	1409	2021-11-18 17:47:13	2	0	23.5078	68	1	male	1	1.65	64	No	Married	1	#NULL!	1	Respiratory System	4	0	0	0	1	0	0	1	57	1	31	#NULL!	7.75	6.63	85.5	110	1	2	3.47	1	32.8	0.81	129	2	0.13	10	#NULL!	#NULL!	#NULL!	#NULL!	13.8	95
1	1331	2021-11-19 09:13:33	1	1	#NULL!	74	2	female	2	1.5	#NULL!	Yes	Married	1	#NULL!	0	Digestive System	0	0	0	0	0	0	0	0	64	1	37	#NULL!	3.11	2.66	85.5	93	1	2	3.35	1	30	0.26	68	1	0.07	10.3	#NULL!	#NULL!	#NULL!	#NULL!	47	9
1	1305	2021-11-19 09:45:45	1	1	19.1467	66	1	female	2	1.55	46	No	Married	1	#NULL!	0	Digestive System	0	0	0	0	0	0	0	0	70	2	44	#NULL!	6.88	5.31	77.2	144	2	2	4.66	2	44	1.27	292	2	0.3	10.4	6.13	0.89	2.27	#NULL!	12.1	17
1	1233	2021-11-19 09:45:45	1	1	#NULL!	84	4	male	1	1.65	#NULL!	Yes	Married	1	#NULL!	1	Digestive System	0	0	0	0	0	0	0	0	52	1	28	#NULL!	4.54	3.47	76.5	63	1	2	2.73	1	21	0.61	259	2	0.27	10.5	#NULL!	#NULL!	#NULL!	#NULL!	5.1	9
1	1284	2021-11-19 10:22:51	2	0	27.2817	70	1	male	1	1.68	77	No	Married	1	#NULL!	0	Respiratory System	0	0	1	1	1	0	0	0	75	2	44	#NULL!	6.27	3.55	56.6	164	2	1	5.22	2	49.7	1.87	261	2	0.33	12.5	2.87	1	0.89	1	8.8	18
1	1320	2021-11-19 11:27:14	1	0	22.0317	81	4	male	1	1.58	55	No	Married	1	#NULL!	0	Respiratory System	4	0	0	0	0	0	0	0	64	1	42	#NULL!	7.72	4.47	58.1	141	2	1	4.16	2	42.6	1.51	451	3	0.42	9.4	#NULL!	#NULL!	#NULL!	#NULL!	7.3	21
1	1444	2021-11-19 11:42:29	2	0	24.4444	73	2	male	1	1.5	55	No	Married	1	#NULL!	0	Respiratory System	0	0	0	0	0	0	0	1	63	1	32	#NULL!	5.57	3.9	70.1	134	2	2	4.25	2	42.9	1.09	192	2	0.23	12.1	#NULL!	#NULL!	#NULL!	#NULL!	13.5	16
1	1397	2021-11-19 12:08:43	1	0	21.7776	70	1	male	1	1.78	69	No	Married	1	#NULL!	0	Reproductive System	4	0	1	0	0	0	0	0	69	2	37	#NULL!	4.18	2.4	57.3	125	2	1	4.1	2	38	1.25	198	2	0.17	8.3	5.13	1.48	1.27	1	12.9	12
1	1440	2021-11-19 14:13:19	2	1	18.2899	82	4	female	2	1.62	48	No	Married	1	#NULL!	0	Digestive System	4	0	1	0	1	0	0	0	64	1	37	#NULL!	7.97	5.16	64.7	123	2	1	3.91	1	36.2	1.88	265	2	0.25	9.6	#NULL!	#NULL!	#NULL!	#NULL!	28.4	26
1	1308	2021-11-19 15:08:00	2	0	23.8895	73	2	male	1	1.76	74	No	Married	1	#NULL!	0	Digestive System	0	0	0	0	0	1	0	0	61	1	38	#NULL!	9.26	5.27	56.9	166	2	1	5.03	2	48.5	3.05	277	2	0.25	8.9	#NULL!	#NULL!	#NULL!	#NULL!	3.5	14
1	1515	2021-11-21 10:35:30	1	0	22.7694	72	2	female	2	1.54	54	No	Married	1	#NULL!	0	Digestive System	0	1	1	0	0	0	0	0	63	1	37	#NULL!	5.58	3	53.7	140	2	1	4.2	2	40.7	1.71	184	2	0.17	9	#NULL!	#NULL!	#NULL!	#NULL!	10.3	14
1	1428	2021-11-22 08:11:44	2	0	21.3039	78	3	male	1	1.65	58	No	Married	1	#NULL!	0	Respiratory System	0	0	0	0	0	0	0	0	62	1	35	#NULL!	4	2.6	65.2	146	2	1	4.55	2	44.4	0.93	163	2	0.17	10.1	4.07	0.88	0.72	1	7.9	16
1	1395	2021-11-22 09:33:25	1	0	23.7954	67	1	male	1	1.64	64	No	Married	1	#NULL!	0	Urinary System	0	0	0	0	0	0	0	0	66	1	42	#NULL!	8.16	5.08	62.1	191	2	1	5.8	2	55.3	2.41	176	2	0.22	12.5	#NULL!	#NULL!	#NULL!	#NULL!	20.5	19
1	1454	2021-11-23 09:04:39	1	1	17.4472	75	2	male	1	1.65	47.5	No	Married	1	#NULL!	1	Digestive System	0	1	1	0	0	0	0	1	58	1	29	#NULL!	5.75	4.46	77.5	131	2	2	4.3	2	37.8	0.5	206	2	0.19	9.2	4.81	1	1.04	1	14.8	12
1	1108	2021-11-23 09:49:26	2	1	16.4354	78	3	female	2	1.48	36	No	Married	1	#NULL!	0	Urinary System	0	1	0	0	0	0	0	0	70	2	41	#NULL!	6.66	4.85	72.7	125	2	2	4.24	2	39	1.32	333	3	0.3	9	#NULL!	#NULL!	#NULL!	#NULL!	5	13
1	1209	2021-11-23 09:50:22	2	0	26.6097	68	1	male	1	1.69	76	No	Married	1	#NULL!	0	Respiratory System	4	0	0	0	0	0	0	0	72	2	39	308	6.84	3.52	51.4	165	2	1	5.15	2	48.8	1.59	236	2	0.25	10.8	4.51	2.99	0.82	1	8.5	23
1	1451	2021-11-23 10:25:04	1	1	21.7993	94	5	male	1	1.7	63	No	Widowed	0	#NULL!	0	Respiratory System	4	0	0	0	0	0	0	0	50	1	26	#NULL!	141.9	#NULL!	#NULL!	#NULL!	1	#NULL!	3.1	1	#NULL!	#NULL!	#NULL!	1	#NULL!	#NULL!	2.91	1.27	0.87	1	5.9	9
1	1270	2021-11-23 11:36:07	2	1	18.3594	81	4	male	1	1.6	47	No	Married	1	#NULL!	0	Digestive System	0	0	0	0	0	0	0	1	55	1	34	158	6.1	4.36	71.4	121	2	2	4.26	2	36.1	1.22	232	2	0.24	10.4	5.12	0.68	1.35	1	12.2	95
1	1340	2021-11-24 09:31:53	2	1	20.3125	84	4	female	2	1.6	52	No	Married	1	#NULL!	0	Reproductive System	0	0	0	0	0	0	0	0	67	1	45	#NULL!	5.58	3.84	68.9	144	2	1	4.37	2	43.5	1.4	138	2	0.16	11.5	4.53	0.93	1.36	0	11.2	21
1	1475	2021-11-24 10:01:08	1	1	17.9982	65	1	male	1	1.65	49	No	Married	1	#NULL!	0	Digestive System	0	1	0	0	0	0	0	0	61	1	38	#NULL!	3.25	1.87	57.6	117	1	1	4.22	2	35.7	0.94	199	2	0.17	8.5	#NULL!	#NULL!	#NULL!	#NULL!	8.5	16
1	1413	2021-11-24 10:34:49	2	1	18.424	88	5	male	1	1.68	52	No	Married	1	#NULL!	0	Urinary System	0	0	0	0	0	1	0	1	59	1	28	#NULL!	7.51	4.72	62.9	101	1	1	3.51	1	31	1.61	231	2	0.19	8.3	#NULL!	#NULL!	#NULL!	#NULL!	5.1	8
1	1523	2021-11-25 10:04:24	2	0	23.3844	66	1	male	1	1.68	66	No	Married	1	#NULL!	0	Urinary System	0	0	1	0	0	0	0	0	55	1	35	#NULL!	0	3.44	42.9	166	2	1	2.8	1	50.6	3.64	274	2	0.28	10.4	5.79	6.63	0.91	#NULL!	6.7	22
1	1469	2021-11-25 10:22:30	1	1	19.3878	79	3	female	2	1.4	38	No	Other	3	#NULL!	0	Respiratory System	0	0	0	0	0	1	0	1	61	1	34	#NULL!	5.58	4.48	80	128	2	2	4.16	2	38.9	0.54	170	2	0.17	9.7	3.65	1.31	0.99	1	37.4	24
1	1571	2021-11-26 12:05:07	2	0	24.5578	72	2	female	2	1.55	59	No	Married	1	#NULL!	0	Respiratory System	0	1	0	0	0	0	0	0	65	1	38	#NULL!	8.6	4.3	50	147	2	1	4.91	2	44.8	3.29	252	2	0.28	11.2	4.27	1.15	1.03	1	7.8	10
1	1514	2021-11-27 08:42:49	1	0	24.5578	78	3	female	2	1.55	59	No	Widowed	0	#NULL!	0	Digestive System	4	0	1	1	0	0	0	0	65	1	32	#NULL!	9.16	7.14	78	120	1	2	5.2	2	38	1.14	105	2	#NULL!	#NULL!	2.61	0.56	0.73	1	39.6	8
1	1463	2021-11-27 08:46:07	1	1	19.6052	87	5	male	1	1.72	58	No	Married	1	#NULL!	0	Hematologic System	4	0	0	0	0	0	0	0	63	1	38	#NULL!	6.85	3.88	56.6	145	2	2	4.64	2	42.6	0.61	80	1	0.09	11.4	4.75	1.45	1.09	1	14.3	21
1	1452	2021-11-27 09:35:39	2	1	20.8889	78	3	female	2	1.5	47	No	Widowed	0	#NULL!	0	Digestive System	0	0	1	1	0	1	0	0	66	1	36	128	9.15	7.6	83.1	104	1	2	3.42	1	32.6	1.03	205	2	0.22	10.6	4.12	1.14	1.11	1	7.9	10
1	1477	2021-11-27 12:05:50	2	0	23.3091	74	2	female	2	1.55	56	No	Other	3	#NULL!	0	Respiratory System	4	0	0	0	0	0	0	0	72	2	43	#NULL!	4.96	3.08	62.3	153	2	1	4.22	2	44.2	1.44	135	2	0.16	11.5	3.44	1.75	0.82	1	35.2	30
1	1503	2021-11-27 15:27:22	1	0	26.449	65	1	male	1	1.75	81	No	Married	1	#NULL!	0	Respiratory System	0	1	0	0	0	0	0	0	58	1	33	#NULL!	5.6	4.67	59.7	119	1	1	0	1	37.1	2.39	223	2	0.27	11.9	#NULL!	#NULL!	#NULL!	#NULL!	5.4	45
1	1598	2021-11-28 08:33:52	1	0	23.8751	69	1	male	1	1.65	65	No	Other	3	#NULL!	0	Digestive System	4	1	1	0	0	0	0	0	68	1	43	#NULL!	5.35	3.35	62.5	126	2	1	3.8	1	37.6	1.19	151	2	0.13	8.3	#NULL!	#NULL!	#NULL!	#NULL!	18.7	14
1	1526	2021-11-28 08:57:11	1	1	15.917	66	1	male	1	1.7	46	No	Married	1	#NULL!	0	Digestive System	4	0	0	0	0	0	0	0	83	2	46	291	7.36	3.76	51.2	133	2	1	3.96	1	39.7	2.17	370	3	0.3	8.2	7.28	1.4	2.24	#NULL!	11.2	16
1	1500	2021-11-28 09:58:34	2	0	21.4031	86	5	female	2	1.45	45	No	Married	1	#NULL!	0	Other	0	0	0	0	1	0	0	0	60	1	35	165	5.67	4.21	74.2	85	1	2	2.56	1	26.5	0.84	214	2	0.22	10.1	4.14	1.38	1.09	1	5.5	12
1	1492	2021-11-29 08:09:47	2	0	25.6312	68	1	female	2	1.53	60	No	Married	1	#NULL!	0	Respiratory System	0	0	1	0	0	0	0	0	64	1	41	#NULL!	3.63	2.04	56.3	125	2	1	3.99	1	37.5	1.14	193	2	0.2	10.3	5.55	0.91	1.71	#NULL!	8.5	16
1	1636	2021-11-29 08:57:39	1	0	22.0932	70	1	male	1	1.78	70	No	Married	1	#NULL!	0	Respiratory System	4	0	1	1	0	0	0	0	58	1	32	#NULL!	7.17	5.02	69.9	106	1	2	3.43	1	32.5	1.42	255	2	0.21	8.3	3.75	0.98	0.99	1	7.4	14
1	1478	2021-11-30 10:00:34	1	0	22.7694	74	2	female	2	1.54	54	No	Married	1	#NULL!	1	Digestive System	4	0	0	0	0	0	0	0	73	2	42	#NULL!	7.69	5.98	77.7	133	2	2	4.52	2	38.5	1.3	314	3	0.35	11.2	#NULL!	#NULL!	#NULL!	#NULL!	12.3	23
1	1398	2021-12-01 09:09:35	2	0	20.83	79	3	male	1	1.58	52	No	Widowed	0	#NULL!	0	Respiratory System	0	0	1	0	1	0	0	0	52	1	32	#NULL!	17.42	14.73	84.5	153	2	2	4.67	2	33	1.88	242	2	0.21	8.8	4.67	1.15	1.04	1	10.5	41
1	1672	2021-12-01 09:33:41	1	0	21.4844	68	1	female	2	1.6	55	No	Married	1	#NULL!	0	Reproductive System	0	1	0	0	0	0	0	0	77	2	45	#NULL!	5.86	3.82	65.1	146	2	1	4.54	2	44.2	1.7	218	2	0.19	8.5	5.8	1.44	1.28	#NULL!	4.4	16
1	1601	2021-12-01 10:06:54	2	0	22.2222	66	1	female	2	1.5	50	No	Married	1	#NULL!	0	Respiratory System	4	0	1	0	0	0	0	0	54	1	37	245	5.66	3.79	66.8	113	1	2	3.81	1	34	1.04	241	2	0.21	8.9	3.83	1.44	0.75	1	7.5	49
1	1540	2021-12-01 14:10:56	2	1	17.7778	75	2	female	2	1.5	40	No	Married	1	#NULL!	0	Respiratory System	0	0	1	0	0	0	0	0	62	1	38	#NULL!	6.81	4.57	67.1	122	2	1	3.98	1	37.1	1.77	304	3	0.27	9	3.42	0.83	1.3	0	6.2	23
1	1473	2021-12-02 16:55:12	2	0	22.3214	79	3	male	1	1.68	63	No	Married	1	#NULL!	0	Respiratory System	0	0	1	0	0	0	0	0	63	1	40	#NULL!	6.75	3.85	57.2	155	2	1	4.61	2	45.3	2.06	179	2	0.21	11.5	5.63	3.2	0.81	#NULL!	4	14
1	1631	2021-12-03 08:25:35	2	0	24.974	75	2	male	1	1.55	60	No	Other	3	#NULL!	0	Hematologic System	4	0	0	0	0	0	0	0	67	1	38	#NULL!	3.92	2.48	63.4	149	2	1	4.48	2	44.3	1.01	195	2	0.16	8.3	#NULL!	#NULL!	#NULL!	#NULL!	10.9	13
1	1626	2021-12-03 09:36:35	1	1	18.591	65	1	female	2	1.59	47	No	Other	3	#NULL!	0	Endocrine System	0	0	0	0	0	0	0	0	66	1	41	#NULL!	4.1	1.76	43.1	136	2	1	4.1	2	40.9	2.01	191	2	0.19	9.8	5.19	0.67	2.21	0	9	14
1	1535	2021-12-04 09:29:31	2	1	#NULL!	73	2	male	1	#NULL!	64	Yes	Married	1	#NULL!	0	Hematologic System	4	0	0	0	0	0	0	0	67	1	42	#NULL!	52.8	2.75	64.6	152	2	1	6	2	45.4	1.04	199	2	0.2	10.1	#NULL!	#NULL!	#NULL!	#NULL!	7.4	29
1	1572	2021-12-04 09:39:52	1	0	24	78	3	female	2	1.5	54	No	Other	3	#NULL!	0	Respiratory System	0	1	0	0	0	0	0	0	68	1	41	#NULL!	23.5	3.93	68.2	141	2	1	4	1	40.9	1.47	226	2	0.2	9	6.51	1.09	1.65	#NULL!	15.7	15
1	1620	2021-12-04 11:48:36	1	0	23.4221	69	1	female	2	1.56	57	No	Married	1	#NULL!	0	Respiratory System	0	0	0	0	0	0	0	0	74	2	49	#NULL!	5.99	3.76	62.9	144	2	1	4.69	2	45	1.9	171	2	0.2	12	#NULL!	#NULL!	#NULL!	#NULL!	18.2	15
1	1494	2021-12-04 11:50:33	1	0	21.6311	79	3	female	2	1.58	54	No	Other	3	#NULL!	0	Respiratory System	0	1	1	0	1	0	0	0	68	1	39	#NULL!	4.53	2.4	52.9	128	2	1	3.66	1	37.8	1.8	219	2	0.18	8.3	#NULL!	#NULL!	#NULL!	#NULL!	6.1	10
1	1420	2021-12-05 08:52:00	1	1	23.6832	79	3	male	1	1.51	54	No	Married	1	#NULL!	0	Respiratory System	0	0	0	0	0	0	0	0	67	1	32	131	2.27	1.48	65.2	94	1	1	2.43	1	30	0.55	69	1	#NULL!	#NULL!	2.6	0.66	0.92	1	30	15
1	1258	2021-12-06 12:46:07	1	1	#NULL!	68	1	female	2	1.56	#NULL!	Yes	Married	1	#NULL!	0	Digestive System	4	1	0	0	0	0	0	1	74	2	40	176	14.8	13.89	93.8	156	2	2	5.12	2	47.6	0.44	152	2	0.21	13.7	#NULL!	#NULL!	#NULL!	#NULL!	26.3	36
1	1519	2021-12-07 10:06:57	1	0	24.6181	74	2	male	1	1.78	78	No	Married	1	#NULL!	0	Digestive System	0	0	1	1	0	0	0	0	62	1	38	182	12.76	9.22	72.3	166	2	2	4.96	2	47.9	2.61	258	2	0.25	9.6	3.45	0.79	1.11	1	8.2	16
1	1464	2021-12-07 10:42:02	1	0	24.4444	67	1	female	2	1.5	55	No	Married	1	#NULL!	0	Digestive System	0	0	1	0	1	0	0	0	69	2	41	#NULL!	6.35	3.37	53	61	1	1	3.04	1	23.5	2.4	254	2	0.34	13.4	3.46	2.33	0.85	1	6.3	15
1	1619	2021-12-07 14:07:37	1	0	22.8374	74	2	male	1	1.7	66	No	Married	1	#NULL!	0	Other	4	0	0	0	0	0	0	0	62	1	37	#NULL!	2.44	0.65	26.6	126	2	1	3.92	1	35.8	1.29	167	2	0.14	8.5	3.89	1.79	0.99	1	3.7	13
1	1652	2021-12-08 09:30:24	1	1	18.8189	71	2	male	1	1.63	50	No	Married	1	#NULL!	0	Digestive System	4	0	0	0	0	0	0	0	67	1	36	114	0	3.14	53.4	118	1	1	0	1	35.2	2.65	50	1	0.05	9.8	2.8	0.63	0.99	1	21.9	27
1	1659	2021-12-08 09:52:15	2	1	18.4013	71	2	male	1	1.76	57	No	Married	1	#NULL!	0	Digestive System	0	0	1	0	0	0	0	0	63	1	33	163	3.99	2.94	73.5	122	2	2	3.57	1	34.8	0.72	175	2	0.15	8.7	4.14	1.22	1.04	1	8.9	5
1	1529	2021-12-08 10:37:52	2	1	20.3954	68	1	female	2	1.55	49	No	Married	1	#NULL!	0	Reproductive System	0	1	0	0	0	0	0	0	65	1	40	#NULL!	4.18	2.65	63.5	124	2	1	4.07	2	37.8	1.19	232	2	0.24	10.3	#NULL!	#NULL!	#NULL!	#NULL!	8.5	14
1	1558	2021-12-08 10:37:52	2	1	19.2234	74	2	female	2	1.53	45	No	Married	1	#NULL!	0	Digestive System	0	1	0	0	0	0	0	0	77	2	49	#NULL!	6.36	4.22	66.4	147	2	1	4.84	2	44.7	1.91	179	2	0.16	8.9	5.83	0.68	1.99	#NULL!	10.5	15
1	1632	2021-12-09 08:19:56	1	0	29.4118	74	2	male	1	1.7	85	No	Married	1	#NULL!	0	Respiratory System	4	0	1	0	0	0	0	0	68	1	40	#NULL!	8.04	5.41	67.1	151	2	1	4.38	2	44.2	2	236	2	0.2	8.6	#NULL!	#NULL!	#NULL!	#NULL!	6.8	16
1	1545	2021-12-09 09:21:22	1	0	22.8374	66	1	male	1	1.7	66	No	Married	1	#NULL!	0	Respiratory System	4	0	0	0	0	0	0	0	69	2	43	#NULL!	4.34	2.84	65.4	146	2	1	4.43	2	42.9	1.11	138	2	0.13	9.6	6.3	0.89	1.85	#NULL!	10.4	11
1	1531	2021-12-09 10:23:35	1	1	#NULL!	79	3	male	1	#NULL!	#NULL!	Yes	Married	1	#NULL!	0	Reproductive System	0	1	1	1	1	0	0	0	68	1	40	#NULL!	5.58	3.71	66.5	156	2	1	5.09	2	47.3	1.36	126	2	0.13	10.1	4.14	1.65	0.91	1	9.9	22
1	1382	2021-12-09 15:47:53	2	1	18.7305	72	2	female	2	1.55	45	No	Married	1	#NULL!	0	Reproductive System	0	0	0	0	0	0	0	0	67	1	39	#NULL!	17.5	3.45	66.3	151	2	1	58.5	2	44.6	1.5	140	2	0.14	10.3	4.63	1.18	0.93	1	15.2	48
1	1603	2021-12-10 10:00:12	1	0	25.7812	83	4	male	1	1.6	66	No	Married	1	#NULL!	0	Digestive System	4	0	0	0	0	0	0	0	76	2	33	#NULL!	9.96	7.71	77.5	126	2	2	4.4	2	36.4	1.34	296	2	0.3	10	5.21	5.95	0.02	#NULL!	431.8	27
1	1585	2021-12-10 10:04:54	1	0	25.3906	80	3	female	2	1.6	65	No	Married	1	#NULL!	0	Respiratory System	0	0	1	0	0	0	0	0	74	2	42	#NULL!	7.93	6.13	77.4	132	2	2	4.27	2	39.6	1.23	261	2	0.24	9	5.51	3.62	0.94	#NULL!	17.6	22
1	1648	2021-12-10 10:29:08	1	0	21.3039	65	1	male	1	1.65	58	No	Married	1	#NULL!	0	Respiratory System	4	0	0	0	0	0	0	0	59	1	36	#NULL!	4.12	2.43	58.9	141	2	1	4.3	2	41.4	1.14	190	2	0.17	8.7	6.3	1.57	1.5	#NULL!	4.5	12
1	1593	2021-12-11 08:57:44	1	0	29.6749	81	4	male	1	1.48	65	No	Married	1	#NULL!	0	Reproductive System	4	0	1	0	0	0	0	0	61	1	40	#NULL!	8.06	5.84	72.6	124	2	2	3.94	1	36.8	1.2	223	2	0.2	9	#NULL!	#NULL!	#NULL!	#NULL!	6.2	11
1	1554	2021-12-11 09:33:40	1	1	19.8413	74	2	male	1	1.68	56	No	Married	1	#NULL!	0	Endocrine System	0	0	1	1	0	0	0	0	57	1	31	#NULL!	3.9	2.61	50.3	104	1	1	1.3	1	31.5	1.78	290	2	0.23	8	#NULL!	#NULL!	#NULL!	#NULL!	5.9	17
1	1556	2021-12-11 09:49:17	2	0	22.6757	74	2	male	1	1.68	64	No	Married	1	#NULL!	0	Urinary System	0	0	1	0	1	0	0	0	62	1	40	#NULL!	9.2	5.29	57.5	167	2	1	4.99	2	49.7	3.13	160	2	0.14	9	#NULL!	#NULL!	#NULL!	#NULL!	12.8	26
1	1628	2021-12-11 09:58:18	2	0	24.4898	84	4	male	1	1.75	75	No	Married	1	#NULL!	0	Skin and Appendages	0	0	0	1	0	0	0	0	73	2	44	#NULL!	6.25	4.4	70.2	166	2	1	5.02	2	49.4	1.4	134	2	0.18	13.7	4.87	1.86	1.09	1	10.8	49
1	1606	2021-12-11 11:06:01	1	1	18.7305	71	2	female	2	1.55	45	No	Married	1	#NULL!	0	Digestive System	0	1	0	0	0	0	0	0	72	2	41	#NULL!	2.66	1.7	63.5	138	2	1	3.95	1	40.5	0.61	69	1	0.07	9.3	#NULL!	#NULL!	#NULL!	#NULL!	29.1	23
1	1663	2021-12-11 11:58:00	1	0	25.3906	74	2	female	2	1.6	65	No	Other	3	#NULL!	0	Respiratory System	0	0	0	0	0	0	0	0	65	1	32	#NULL!	3.85	1.81	46.9	128	2	1	4.08	2	39.7	1.52	202	2	0.22	11.1	5.29	0.94	0.93	#NULL!	4.6	9
1	1613	2021-12-12 11:23:33	1	0	20.8117	67	1	female	2	1.55	50	No	Married	1	#NULL!	0	Reproductive System	4	0	0	0	0	0	0	0	71	2	36	162	9.6	0.76	44.2	114	1	1	2.7	1	34.1	0.82	26	1	0.03	12.3	4.55	1.33	1.01	1	5.9	7
1	1694	2021-12-12 11:37:46	1	0	22.7204	69	1	male	1	1.73	68	No	Married	1	#NULL!	0	Other	0	0	1	1	1	0	0	0	68	1	44	#NULL!	7.27	4.52	62.2	160	2	1	4.77	2	46.7	2	115	2	0.12	10.8	3.18	2.6	0.78	1	12.4	44
1	1713	2021-12-13 08:58:02	1	0	23.0681	72	2	female	2	1.53	54	No	Married	1	#NULL!	0	Digestive System	0	1	1	0	0	0	0	0	66	1	41	#NULL!	4.53	2.18	48.2	122	2	1	3.67	1	35.8	1.63	168	2	0.16	9.3	#NULL!	#NULL!	#NULL!	#NULL!	22.5	17
1	1608	2021-12-13 08:58:37	1	0	23.5078	69	1	male	1	1.65	64	No	Married	1	#NULL!	0	Digestive System	0	1	1	0	0	0	0	0	65	1	41	#NULL!	3.85	2.44	63.4	124	2	1	3.76	1	35.7	0.85	154	2	0.13	8.2	#NULL!	#NULL!	#NULL!	#NULL!	20	15
1	1634	2021-12-13 10:55:49	1	0	23.0469	81	4	male	1	1.6	59	No	Married	1	#NULL!	0	Respiratory System	0	1	0	0	1	1	0	0	72	2	42	172	4.68	2.65	56.9	151	2	1	4.49	2	43.6	1.43	103	2	0.14	13.2	3.59	0.93	1.31	0	11.1	51
1	1647	2021-12-13 11:13:32	1	0	23.3067	74	2	male	1	1.67	65	No	Married	1	#NULL!	0	Respiratory System	4	1	0	0	0	0	0	0	72	2	44	#NULL!	6.37	4.07	63.8	140	2	1	4.57	2	41.5	1.57	203	2	0.2	9.8	5.11	1.78	0.8	1	6.4	15
1	1566	2021-12-14 08:32:36	1	1	20.3244	83	4	male	1	1.63	54	No	Other	3	#NULL!	0	Digestive System	4	0	1	0	0	0	0	0	63	1	39	#NULL!	4.04	3.06	75.8	133	2	2	4.45	2	40	0.56	115	2	0.12	10.3	5.72	1.28	1.42	#NULL!	15.4	102
1	1604	2021-12-14 09:01:25	1	1	16.609	66	1	male	1	1.7	48	No	Married	1	#NULL!	0	Digestive System	4	0	0	0	0	0	0	0	80	2	43	258	6.04	2.62	43.2	135	2	1	4.15	2	41.2	2.49	324	3	0.27	8.4	6.74	1.48	2.05	#NULL!	11.1	22
1	1565	2021-12-14 09:39:08	2	0	24.6094	72	2	female	2	1.6	63	No	Married	1	#NULL!	0	Digestive System	4	0	1	0	0	0	0	0	82	2	44	#NULL!	5.77	3.05	52.8	164	2	1	5.06	2	49	1.89	146	2	0.14	9.6	5.78	0.94	1.59	#NULL!	27.4	19
1	1677	2021-12-14 10:31:39	1	1	16.0965	73	2	male	1	1.78	51	No	Married	1	#NULL!	1	Respiratory System	4	0	0	1	0	0	0	0	69	2	27	#NULL!	7.58	5.84	76.9	116	1	2	4.3	2	35	1.02	167	2	0.17	10.5	3.03	1.44	0.45	1	14.5	8
1	1570	2021-12-14 11:00:19	2	0	22.4913	69	1	male	1	1.7	65	No	Married	1	#NULL!	0	Respiratory System	0	0	0	0	0	0	0	0	62	1	39	#NULL!	7.62	5.55	73	152	2	2	4.63	2	45.3	1.52	192	2	0.19	9.9	#NULL!	#NULL!	#NULL!	#NULL!	7.3	12
1	1721	2021-12-14 11:14:01	2	0	24.4352	74	2	female	2	1.58	61	No	Married	1	#NULL!	0	Digestive System	0	0	1	0	0	0	0	0	74	2	45	#NULL!	6.45	4.6	71.3	150	2	2	4.69	2	44.8	1.36	237	2	0.22	9.4	#NULL!	#NULL!	#NULL!	#NULL!	19.9	15
1	1599	2021-12-15 10:02:22	1	1	18.3655	92	5	male	1	1.65	50	No	Married	1	#NULL!	0	Urinary System	4	0	1	0	0	1	0	1	61	1	30	#NULL!	9.96	8.48	85.1	74	1	2	3.15	1	22.7	0.43	250	2	0.18	7.2	#NULL!	#NULL!	#NULL!	#NULL!	9.3	10
1	1635	2021-12-15 10:34:02	2	0	25.3333	76	3	male	1	1.5	57	No	Married	1	#NULL!	0	Respiratory System	4	0	1	1	1	0	0	0	52	1	28	#NULL!	11.34	10.09	89	175	2	2	5.44	2	51.5	0.92	116	2	0.14	11.6	5.04	1.09	1.94	0	21	39
1	1640	2021-12-15 14:15:14	1	0	24.4418	65	1	male	1	1.74	74	No	Other	3	#NULL!	0	Respiratory System	4	0	0	0	0	0	0	0	71	2	45	#NULL!	4.13	3.16	76.7	123	2	2	3.56	1	35.6	0.61	96	1	0.08	8.7	#NULL!	#NULL!	#NULL!	#NULL!	17.8	59
1	1616	2021-12-16 07:51:52	1	0	23.5883	71	2	male	1	1.66	65	No	Married	1	#NULL!	0	Respiratory System	0	0	0	0	0	0	0	0	64	1	42	#NULL!	6.29	4.58	72.8	145	2	2	4.55	2	44	1.04	212	2	0.21	9.9	4.72	0.88	1.21	0	8.3	58
1	1727	2021-12-16 09:23:15	1	0	27.7551	69	1	male	1	1.75	85	No	Married	1	#NULL!	0	Digestive System	0	0	1	0	0	0	0	0	80	2	49	#NULL!	5.25	3.04	57.8	129	2	1	3.82	1	36.9	1.74	264	2	0.19	7.1	#NULL!	#NULL!	#NULL!	#NULL!	6.6	13
1	1720	2021-12-16 11:11:29	1	1	18.7305	89	5	female	2	1.55	45	No	Widowed	0	#NULL!	0	Respiratory System	0	0	1	1	1	1	0	0	63	1	35	165	6.41	3.18	49.6	138	2	1	4.48	2	42.1	2.53	206	2	0.22	10.8	4.81	2.35	0.73	1	6.7	11
1	1597	2021-12-16 11:38:17	2	1	17.9592	89	5	male	1	1.75	55	No	Married	1	#NULL!	0	Digestive System	0	0	0	0	0	0	0	1	56	1	31	#NULL!	7.97	6.87	86.2	120	1	2	3.19	1	35	0.27	134	2	0.13	10	#NULL!	#NULL!	#NULL!	#NULL!	21.4	9
1	1714	2021-12-17 08:57:06	2	0	31.25	74	2	female	2	1.6	80	No	Married	1	#NULL!	0	Respiratory System	0	0	1	1	0	0	0	0	78	2	39	#NULL!	6.24	4.63	74.2	140	2	2	4.44	2	41.7	1.19	185	2	0.18	9.6	4.47	1.81	1.07	1	7.5	18
1	1661	2021-12-17 09:28:22	1	0	27.2392	73	2	female	2	1.58	68	No	Married	1	#NULL!	0	Respiratory system	0	0	1	0	0	0	0	0	69	2	43	#NULL!	4.76	2.44	51.2	125	2	1	4.29	2	38.1	1.98	177	2	0.18	9.9	4.14	1.26	1.55	0	7.2	11
1	1611	2021-12-17 09:32:46	1	0	27.4077	70	1	female	2	1.54	65	No	Married	1	#NULL!	0	Respiratory System	0	1	0	0	0	0	0	0	70	2	43	#NULL!	4.62	2.38	51.4	151	2	1	4.81	2	43.7	1.84	247	2	0.24	9.8	#NULL!	#NULL!	#NULL!	#NULL!	4.3	18
1	1690	2021-12-17 10:08:47	1	0	24.7676	83	4	male	1	1.62	65	No	Married	1	#NULL!	0	Other	0	0	0	0	1	0	0	0	73	2	46	#NULL!	6.93	5.05	73	162	2	2	5.23	2	47.3	1.28	210	2	0.21	9.9	4.65	1.38	1.39	0	16.1	29
1	1644	2021-12-17 10:42:23	1	0	24.5578	73	2	female	2	1.55	59	No	Other	3	#NULL!	0	Respiratory System	4	1	1	0	0	0	0	0	70	2	45	#NULL!	4.19	1.74	41.5	132	2	1	4.03	2	38.7	1.99	252	2	0.24	9.6	5.24	1.79	1.33	#NULL!	8.8	19
1	1703	2021-12-17 10:52:44	1	1	18.4911	68	1	female	2	1.56	45	No	Married	1	#NULL!	0	Digestive System	0	0	0	0	0	0	0	0	64	1	38	#NULL!	5.48	2.47	45.2	142	2	1	4.64	2	42	2.32	238	2	0.2	8.6	3.81	2.36	0.66	1	11.8	58
1	1709	2021-12-17 13:04:00	2	1	18.0697	87	5	male	1	1.68	51	No	Married	1	#NULL!	0	Respiratory System	0	0	0	0	0	0	0	0	81	2	29	150	1.13	0.6	53.1	44	1	1	1.29	1	13.5	0.27	156	2	0.18	11.5	2.52	0.57	1.22	0	10.3	9
1	1639	2021-12-17 14:54:47	2	0	22.6562	85	4	male	1	1.6	58	No	Divorced	4	#NULL!	0	Respiratory System	0	0	0	0	0	0	0	1	59	1	31	#NULL!	1.3	3.15	66.1	137	2	2	1.3	1	40.8	0.77	312	3	0.28	9.1	4.47	0.67	1.43	0	10.8	16
1	1693	2021-12-18 09:04:31	1	1	17.5278	82	4	female	2	1.62	46	No	Married	1	#NULL!	0	Digestive System	4	0	1	0	1	0	0	0	68	1	36	#NULL!	8.48	6.46	76.3	121	2	2	3.75	1	35	1.25	280	2	0.25	9.1	#NULL!	#NULL!	#NULL!	#NULL!	30.6	15
1	1557	2021-12-18 09:14:53	2	0	20.7612	76	3	male	1	1.7	60	No	Married	1	#NULL!	0	Digestive System	4	0	0	0	0	0	0	0	74	2	37	140	5.87	4.27	72.8	115	1	2	3.3	1	35.4	1	222	2	0.18	8.2	3.68	0.98	1.07	1	18.9	9
1	1673	2021-12-18 09:36:29	1	0	22.8624	74	2	male	1	1.62	60	No	Married	1	#NULL!	0	Digestive System	4	0	1	0	0	0	0	0	65	1	41	262	6.93	4.56	65.9	119	1	1	3.78	1	35.2	1.52	165	2	0.18	11.1	4.93	1.74	0.69	1	6.9	13
1	1711	2021-12-18 10:07:48	1	0	24.1672	84	4	male	1	1.64	65	No	Married	1	#NULL!	0	Respiratory System	4	0	0	0	0	0	0	0	68	1	37	#NULL!	5.5	6.95	69.5	130	2	2	8.2	2	38.5	1.8	390	3	0.38	9.6	5.15	0.95	1.14	1	7.1	43
1	1683	2021-12-18 10:11:44	1	0	23.03	66	1	male	1	1.68	65	No	Divorced	4	#NULL!	0	Digestive System	4	0	0	0	0	0	0	0	65	1	41	#NULL!	34.2	6.7	67.9	168	2	1	0	2	48.6	2.48	227	2	0.21	9.3	5.46	1.03	1.3	#NULL!	13.5	21
1	1649	2021-12-19 11:46:22	1	0	20.5693	79	3	male	1	1.65	56	No	Married	1	#NULL!	0	Digestive System	4	0	1	0	0	0	0	0	68	1	41	#NULL!	7.6	4.74	62.3	144	2	1	4.79	2	43.3	2.11	254	2	0.31	12.1	#NULL!	#NULL!	#NULL!	#NULL!	9.7	10
1	1766	2021-12-20 09:18:45	1	0	22.8928	67	1	female	2	1.55	55	No	Married	1	#NULL!	0	Reproductive System	4	0	0	0	0	0	0	0	66	1	34	#NULL!	13.68	11.55	84.5	113	1	2	3.6	1	34.5	1.56	135	2	0.16	11.6	#NULL!	#NULL!	#NULL!	#NULL!	10.2	21
1	1555	2021-12-20 09:46:53	1	0	22.8269	66	1	female	2	1.48	50	No	Widowed	0	#NULL!	0	Respiratory System	0	0	0	0	0	0	0	0	62	1	38	#NULL!	7.53	5.51	73.2	136	2	2	4.5	2	41	1.37	220	2	0.25	11.3	5.05	1.17	1.22	0	8.6	18
1	1736	2021-12-21 09:37:12	1	1	19.563	71	2	female	2	1.55	47	No	Widowed	0	#NULL!	0	Digestive System	0	0	0	0	0	0	0	0	78	2	43	#NULL!	3.6	2.45	68.2	143	2	1	4.24	2	43.2	0.79	104	2	0.09	8.6	#NULL!	#NULL!	#NULL!	#NULL!	34.4	18
1	1569	2021-12-21 09:51:45	2	0	24.974	70	1	male	1	1.55	60	No	Married	1	#NULL!	0	Digestive System	0	0	0	0	0	0	0	0	73	2	41	#NULL!	3.1	5.62	78.9	140	2	2	10.2	2	40.3	0.84	242	2	0.21	8.6	#NULL!	#NULL!	#NULL!	#NULL!	18.8	7
1	1705	2021-12-21 10:01:53	1	0	23.8281	67	1	male	1	1.6	61	No	Married	1	#NULL!	0	Respiratory System	0	0	0	0	0	0	0	0	65	1	39	#NULL!	11.2	3.54	61.5	154	2	1	2.8	1	45.4	1.77	181	2	0.16	8.8	5.8	1.49	1.39	#NULL!	9.2	13
1	1723	2021-12-21 10:15:26	1	1	#NULL!	82	4	female	2	1.58	#NULL!	Yes	Other	3	#NULL!	0	Digestive System	0	1	1	1	0	0	0	0	65	1	31	163	7.44	4.04	54.2	112	1	1	4.18	2	36	2.61	252	2	0.25	10	#NULL!	#NULL!	#NULL!	#NULL!	4.1	11
1	1734	2021-12-21 16:34:48	2	0	22.1893	68	1	female	2	1.56	54	No	Married	1	#NULL!	0	Respiratory System	4	0	0	0	0	0	0	0	60	1	37	#NULL!	3.37	2.19	64.8	110	1	1	3.54	1	33.6	0.86	113	2	0.11	9.5	#NULL!	#NULL!	#NULL!	#NULL!	8.2	10
1	1544	2021-12-22 08:36:25	2	0	25.7778	68	1	female	2	1.5	58	No	Married	1	#NULL!	0	Blood System	4	0	0	1	0	0	0	0	79	2	40	213	12.1	1.77	57	120	1	1	1.2	1	35.7	1.09	194	2	0.19	9.8	3.28	2.77	0.6	1	20.9	734
1	1700	2021-12-22 11:24:20	1	0	24.677	71	2	male	1	1.66	68	No	Married	1	#NULL!	0	Endocrine System	4	0	0	0	0	0	0	0	74	2	45	#NULL!	9.64	6.58	68.4	161	2	1	5.03	2	47.2	2.48	196	2	0.17	8.8	#NULL!	#NULL!	#NULL!	#NULL!	10.3	19
1	1815	2021-12-23 09:09:03	1	0	23.74	70	1	female	2	1.48	52	No	Married	1	#NULL!	0	Respiratory System	0	1	0	0	0	0	0	0	61	1	38	#NULL!	3.05	1.6	52.4	126	2	1	3.97	1	38.2	1.07	126	2	0.15	11.5	3.68	2.77	0.76	1	7	7
1	1625	2021-12-23 10:13:27	1	1	22.8571	67	1	male	1	1.75	70	No	Married	1	#NULL!	0	Digestive System	4	0	0	0	0	1	0	1	42	1	17	60	9.85	7.42	75.3	89	1	2	2.7	1	28	2	271	2	0.21	7.7	2.76	0.74	0.91	1	7.3	9
1	1699	2021-12-23 10:37:55	1	1	#NULL!	79	3	male	1	1.65	#NULL!	Yes	Other	3	#NULL!	0	Reproductive System	4	0	1	0	0	0	0	0	68	1	41	232	6.99	4.91	70.3	145	2	1	4.31	2	42.9	1.57	213	2	0.19	8.7	3.56	1.1	1.5	0	9.2	11
1	1745	2021-12-24 09:16:42	1	0	23.03	74	2	male	1	1.68	65	No	Married	1	#NULL!	0	Blood System	4	0	0	0	0	0	0	0	67	1	42	#NULL!	2.63	1.32	50.1	141	2	1	4.61	2	41.7	0.62	181	2	0.17	9.3	#NULL!	#NULL!	#NULL!	#NULL!	5.7	21
1	1780	2021-12-24 09:49:15	1	1	18.3594	65	1	male	1	1.6	47	No	Married	1	#NULL!	0	Digestive System	0	1	0	0	0	0	0	0	64	1	35	#NULL!	2.67	1.96	73.6	118	1	1	4.16	2	35.2	0.64	143	2	0.13	9.2	#NULL!	#NULL!	#NULL!	#NULL!	9.8	21
1	1724	2021-12-25 09:08:52	2	1	15.8228	80	3	female	2	1.58	39.5	No	Widowed	0	#NULL!	0	Digestive System	0	0	0	0	0	0	0	0	49	1	32	#NULL!	192.6	2.05	53.2	115	1	1	0	1	34.4	1.4	263	2	0.19	7.4	#NULL!	#NULL!	#NULL!	#NULL!	9.6	9
1	1733	2021-12-25 09:25:06	2	0	30.3461	72	2	male	1	1.76	94	No	Married	1	#NULL!	0	Reproductive System	0	0	0	0	0	0	0	0	77	2	42	#NULL!	12.4	3.75	52.3	128	2	1	1.6	1	38.5	2.66	265	2	0.24	8.8	#NULL!	#NULL!	#NULL!	#NULL!	14.4	16
1	1785	2021-12-25 09:35:25	1	1	20.202	68	1	female	2	1.65	55	No	Married	1	#NULL!	0	Reproductive System	0	1	0	0	0	0	0	0	71	2	44	#NULL!	5.1	2.65	51.9	148	2	1	4.58	2	45.1	2.03	209	2	0.18	8.7	#NULL!	#NULL!	#NULL!	#NULL!	3.9	21
1	1784	2021-12-25 09:40:46	2	0	21.7193	67	1	male	1	1.62	57	No	Other	3	#NULL!	0	Digestive System	0	1	0	0	0	0	0	0	70	2	45	#NULL!	6	3.23	56.2	150	2	1	7.2	2	45.1	1.8	199	2	0.18	8.9	4.02	0.74	1.27	0	5.5	16
1	1732	2021-12-25 09:42:25	2	1	18.026	72	2	female	2	1.58	45	No	Other	3	#NULL!	0	Digestive System	0	0	1	0	0	0	0	1	67	1	37	#NULL!	6.42	5.04	78.5	110	1	2	4.4	2	34.6	0.82	390	3	0.37	9.4	7.88	1.08	1.14	#NULL!	12.2	25
1	1744	2021-12-25 12:03:53	2	0	26.7755	65	1	male	1	1.75	82	No	Married	1	#NULL!	0	Respiratory system	0	1	0	0	0	0	0	0	66	1	39	#NULL!	9.1	7.13	78.3	128	2	2	4.07	2	39.2	1.4	244	2	0.29	12	5.26	1.83	1.2	#NULL!	8.1	60
1	1824	2021-12-26 09:03:37	1	1	20.0796	69	1	male	1	1.67	56	No	Married	1	#NULL!	0	Digestive System	4	0	1	0	1	0	0	0	66	1	43	180	5.48	3.11	56.6	149	2	1	4.3	2	44	1.6	132	2	0.11	8.3	3.26	0.56	1.38	0	10.2	32
1	1756	2021-12-27 09:08:04	2	0	24.974	65	1	female	2	1.55	60	No	Married	1	#NULL!	0	Respiratory System	0	0	0	0	0	0	0	0	71	2	41	#NULL!	5	3.08	61.5	136	2	1	4.2	2	40.8	1.55	202	2	0.19	9.4	#NULL!	#NULL!	#NULL!	#NULL!	6.2	37
1	1674	2021-12-27 09:10:31	1	0	21.7993	88	5	male	1	1.7	63	No	Married	1	#NULL!	0	Reproductive System	4	0	0	0	0	0	0	0	53	1	34	#NULL!	4.83	3.62	75	132	2	2	4.05	2	39	0.76	82	1	0.08	9.5	#NULL!	#NULL!	#NULL!	#NULL!	33.1	554
1	1774	2021-12-27 09:31:38	2	1	#NULL!	84	4	male	1	1.7	#NULL!	Yes	Married	1	#NULL!	0	Reproductive System	0	0	0	0	0	0	0	1	58	1	29	82	5.93	4.51	76.1	120	1	2	3.6	1	35	0.73	218	2	0.18	8.4	#NULL!	#NULL!	#NULL!	#NULL!	11.8	5
1	1762	2021-12-27 10:56:19	1	0	23.1834	69	1	male	1	1.7	67	No	Married	1	#NULL!	0	Urinary System	0	1	0	0	0	0	0	0	67	1	37	#NULL!	1470.8	4.76	72.1	147	2	2	22.6	2	44.1	1.29	143	2	0.13	9.2	#NULL!	#NULL!	#NULL!	#NULL!	5.3	52
1	1782	2021-12-27 14:34:11	1	1	15.0597	69	1	male	1	1.65	41	No	Married	1	#NULL!	0	Other	0	0	0	0	0	0	0	0	66	1	36	#NULL!	4.9	3.43	70.1	132	2	2	4.49	2	39.8	1.01	255	2	0.22	8.6	#NULL!	#NULL!	#NULL!	#NULL!	4	11
1	1820	2021-12-28 10:23:51	2	0	22.6667	67	1	female	2	1.5	51	No	Married	1	#NULL!	0	Digestive System	0	1	1	0	1	0	0	0	71	2	39	#NULL!	4.92	3.39	68.9	104	1	1	4.27	2	32.9	1.17	269	2	0.26	9.6	#NULL!	#NULL!	#NULL!	#NULL!	7.5	9
1	1742	2021-12-28 10:26:30	2	0	26.2227	76	3	male	1	1.55	63	No	Married	1	#NULL!	0	Respiratory System	0	0	0	0	0	0	0	0	62	1	37	#NULL!	3.1	1.57	50.6	137	2	1	4.55	2	41.4	1.18	128	2	0.13	10.4	3.31	0.71	1.1	1	12.5	39
1	1776	2021-12-28 14:13:48	1	1	19.3878	88	5	female	2	1.4	38	No	Widowed	0	#NULL!	0	Digestive System	0	0	0	0	0	0	0	1	50	1	29	133	3.47	2.6	74.9	112	1	2	3.87	1	35.8	0.66	178	2	0.18	10	4.59	0.75	1.25	0	14.5	15
1	1773	2021-12-29 08:53:12	2	1	24.974	69	1	female	2	1.55	60	No	Married	1	#NULL!	0	Respiratory System	4	0	1	0	0	1	0	1	62	1	37	117	74.6	6.8	80.7	85	1	2	32.7	2	25.8	0.86	189	2	0.16	8.4	4.12	0.7	1.38	0	3.8	36
1	1764	2021-12-29 11:29:07	1	1	16.5289	74	2	male	1	1.65	45	No	Married	1	#NULL!	0	Respiratory System	4	0	0	0	0	0	0	0	67	1	37	#NULL!	7.36	4.86	65.9	142	2	1	4.07	2	41	1.98	190	2	0.19	9.8	#NULL!	#NULL!	#NULL!	#NULL!	14.6	12
1	1867	2021-12-30 08:18:45	2	1	17.4818	72	2	female	2	1.55	42	No	Married	1	#NULL!	0	Reproductive System	0	1	0	0	0	0	0	0	68	1	37	#NULL!	4.4	3.24	73.7	130	2	2	4.33	2	39	0.93	226	2	0.21	9.3	#NULL!	#NULL!	#NULL!	#NULL!	11.6	21
1	1814	2021-12-30 09:16:40	2	0	22.0386	87	5	male	1	1.65	60	No	Married	1	#NULL!	0	Reproductive System	0	0	1	1	0	1	0	0	63	1	38	#NULL!	9.35	7.48	79.8	161	2	2	4.81	2	46.8	1.04	200	2	0.18	9.2	#NULL!	#NULL!	#NULL!	#NULL!	18.9	15
1	1876	2021-12-30 09:23:33	2	0	23.255	75	2	male	1	1.71	68	No	Married	1	#NULL!	0	Other	4	0	1	0	0	0	0	0	74	2	41	#NULL!	3.69	1.82	49.5	111	1	1	3.47	1	33	1.33	239	2	0.18	7.6	4.94	1.53	1.18	0	8.2	14
1	1743	2021-12-30 10:45:03	1	0	22.0386	89	5	male	1	1.65	60	No	Married	1	#NULL!	0	Digestive System	0	0	1	0	1	0	0	0	60	1	32	186	7.52	5.54	73.7	105	1	2	3.91	1	34.3	1.19	226	2	0.24	10.8	2.23	1.05	0.79	1	5.3	14
1	1851	2021-12-31 09:03:55	2	1	16.609	66	1	male	1	1.7	48	No	Married	1	#NULL!	0	Digestive System	4	0	0	0	0	0	0	0	68	1	40	#NULL!	6.33	3.28	51.8	127	2	1	3.95	1	40	2.09	285	2	0.25	8.6	#NULL!	#NULL!	#NULL!	#NULL!	4.5	11
1	1788	2021-12-31 09:17:51	2	0	22.8624	68	1	male	1	1.62	60	No	Married	1	#NULL!	0	Reproductive System	0	0	1	1	0	0	0	0	64	1	43	#NULL!	1.2	4.59	67.1	158	2	1	3.5	1	45	1.81	236	2	0.22	9.2	#NULL!	#NULL!	#NULL!	#NULL!	9.8	19
1	1799	2021-12-31 09:34:48	1	0	24.2188	75	2	female	2	1.6	62	No	Married	1	#NULL!	0	Other	0	1	1	0	0	0	0	0	60	1	35	#NULL!	7.5	3.3	56	154	2	1	1.1	1	44.1	1.94	132	2	0.15	11.5	#NULL!	#NULL!	#NULL!	#NULL!	18.5	19
1	1847	2022-01-01 09:23:53	1	0	26.2227	70	1	male	1	1.55	63	No	Married	1	#NULL!	0	Digestive System	0	1	0	0	0	0	0	0	65	1	41	#NULL!	4.22	2.36	56	138	2	1	4.74	2	40.1	1.38	255	2	0.22	8.7	#NULL!	#NULL!	#NULL!	#NULL!	9.3	12
1	1866	2022-01-01 09:30:09	1	0	23.3556	74	2	male	1	1.78	74	No	Married	1	#NULL!	0	Digestive System	0	1	1	1	0	0	0	0	69	2	40	#NULL!	9.96	6.66	66.8	158	2	1	4.74	2	46.5	2.49	302	3	0.29	9.7	#NULL!	#NULL!	#NULL!	#NULL!	7.9	12
1	1767	2022-01-05 08:19:40	1	0	22.8269	65	1	female	2	1.48	50	No	Widowed	0	#NULL!	0	Reproductive System	0	0	0	0	0	0	0	0	74	2	40	238	4.4	4.67	64.5	134	2	1	36.9	2	40.1	2.06	296	2	0.3	10.1	5.06	1.05	1.3	0	1.9	11
1	1843	2022-01-05 09:20:54	1	0	20.9572	68	1	male	1	1.62	55	No	Married	1	#NULL!	1	Urinary System	4	0	0	0	0	0	0	0	66	1	35	#NULL!	7.98	6.78	84.9	114	1	2	3.56	1	33.9	0.63	196	2	0.19	9.7	#NULL!	#NULL!	#NULL!	#NULL!	9.4	11
1	1801	2022-01-05 10:22:07	1	0	22.0604	68	1	female	2	1.55	53	No	Other	3	#NULL!	0	Reproductive System	0	1	0	0	0	0	0	0	66	1	41	#NULL!	6.03	4.12	68.2	130	2	1	4.18	2	39.2	1.52	274	2	0.27	9.9	#NULL!	#NULL!	#NULL!	#NULL!	8.2	23
1	1857	2022-01-06 08:28:53	1	1	#NULL!	80	3	female	2	#NULL!	#NULL!	Yes	Other	3	#NULL!	0	Respiratory System	0	0	0	0	1	0	0	0	56	1	34	#NULL!	6.14	4.65	75.7	120	1	2	4.2	2	39	1.1	145	2	0.14	9.5	#NULL!	#NULL!	#NULL!	#NULL!	14.1	76
1	1902	2022-01-06 09:11:10	1	0	23.1111	72	2	female	2	1.5	52	No	Married	1	#NULL!	0	Digestive System	0	1	1	0	0	0	0	0	59	1	38	#NULL!	4.5	2.04	45.3	120	1	1	3.36	1	34.7	1.57	107	2	0.11	10.2	#NULL!	#NULL!	#NULL!	#NULL!	12.4	16
1	1916	2022-01-06 09:31:53	1	1	16.6493	72	2	female	2	1.55	40	No	Married	1	#NULL!	0	Reproductive System	0	1	0	0	0	0	0	0	75	2	41	#NULL!	3.01	1.77	58.8	127	2	1	4.2	2	37.1	1.17	189	2	0.18	9.7	#NULL!	#NULL!	#NULL!	#NULL!	22.6	20
1	1861	2022-01-06 09:46:06	2	1	19.5312	75	2	female	2	1.6	50	No	Married	1	#NULL!	0	Urinary System	0	0	1	0	0	1	0	0	70	2	48	#NULL!	5.17	3.52	68.2	151	2	1	5.05	2	46.1	1.34	176	2	0.26	14.5	#NULL!	#NULL!	#NULL!	#NULL!	18.3	17
1	1877	2022-01-06 09:55:10	1	0	29.4118	74	2	male	1	1.7	85	No	Married	1	#NULL!	0	Respiratory System	4	0	1	0	0	0	0	0	74	2	43	#NULL!	7.99	5.43	68	157	2	1	4.4	2	45	1.87	250	2	0.22	8.6	#NULL!	#NULL!	#NULL!	#NULL!	13.5	16
1	1553	2022-01-06 12:03:28	1	1	#NULL!	84	4	male	1	1.7	#NULL!	Yes	Married	1	#NULL!	0	Respiratory System	4	0	0	0	0	1	0	1	56	1	26	107	8.11	5.53	68.1	146	2	2	5.09	2	46	1.15	224	2	0.21	9.3	3.57	1.05	0.86	1	8.3	9
1	1806	2022-01-07 11:44:57	1	0	21.9671	74	2	male	1	1.68	62	No	Married	1	#NULL!	0	Blood System	4	0	0	0	0	0	0	0	71	2	43	#NULL!	8.8	0.31	38.7	141	2	1	5	2	44	0.28	144	2	0.14	10	#NULL!	#NULL!	#NULL!	#NULL!	6.6	49
1	1853	2022-01-07 14:53:45	2	1	17.9089	82	4	female	2	1.62	47	No	Married	1	#NULL!	0	Digestive System	4	0	1	0	1	0	0	0	67	1	39	#NULL!	7.67	5.4	70.2	122	2	2	3.95	1	36.8	1.53	279	2	0.25	8.8	#NULL!	#NULL!	#NULL!	#NULL!	26.5	23
1	1868	2022-01-08 08:57:33	1	1	22.6562	68	1	male	1	1.6	58	No	Married	1	#NULL!	0	Reproductive System	4	0	1	0	0	0	0	0	60	1	36	#NULL!	5.49	3.53	64.3	79	1	1	2.62	1	24.9	1.53	166	2	0.13	7.6	#NULL!	#NULL!	#NULL!	#NULL!	5.5	20
1	1832	2022-01-08 09:15:41	1	0	25.3331	76	3	female	2	1.46	54	No	Widowed	0	#NULL!	0	Respiratory System	4	0	0	0	0	0	0	0	65	1	36	109	8.31	5.67	68.1	137	2	2	5.06	2	41.7	1.62	363	3	0.34	9.4	2.81	0.71	1.06	1	9.3	30
1	1793	2022-01-08 09:48:33	1	1	17.9688	83	4	male	1	1.6	46	No	Married	1	#NULL!	0	Respiratory System	4	0	0	0	0	0	0	1	56	1	32	#NULL!	6.06	4.11	67.7	138	2	1	4.31	2	40.5	1.38	216	2	0.2	9.1	4.65	0.84	1.03	1	3.3	8
1	1922	2022-01-08 15:15:59	2	1	15.7943	74	2	male	1	1.65	43	No	Married	1	#NULL!	0	Respiratory System	4	0	0	0	0	0	0	1	58	1	32	#NULL!	4.35	3.37	77.5	118	1	2	3.4	1	33.4	0.71	107	2	0.1	9.3	#NULL!	#NULL!	#NULL!	#NULL!	15.1	9
1	1892	2022-01-09 08:57:44	2	0	23.6244	74	2	male	1	1.62	62	No	Married	1	#NULL!	0	Blood System	4	0	0	0	0	0	0	0	79	2	35	#NULL!	5.48	2.9	53	114	1	1	3.45	1	36	1.72	153	2	0.16	10.1	#NULL!	#NULL!	#NULL!	#NULL!	8.1	21
1	1889	2022-01-09 10:24:40	1	0	21.875	65	1	male	1	1.6	56	No	Married	1	#NULL!	0	Respiratory System	4	0	0	0	0	0	0	0	58	1	37	#NULL!	5.49	4.05	73.9	129	2	2	3.92	1	37.7	0.96	165	2	0.15	8.8	5.8	1.34	1.4	#NULL!	4	20
1	1891	2022-01-10 08:36:20	2	0	22.2222	70	1	female	2	1.5	50	No	Married	1	#NULL!	0	Digestive System	4	0	0	0	0	0	0	0	58	1	32	#NULL!	24.1	2.2	75.7	60	1	2	1.4	1	18.4	0.48	24	1	0.03	10.5	#NULL!	#NULL!	#NULL!	#NULL!	5.8	17
1	1883	2022-01-10 08:47:17	1	0	22.8928	72	2	female	2	1.55	55	No	Married	1	#NULL!	0	Respiratory System	0	0	0	0	0	0	0	0	68	1	43	#NULL!	7.23	4.83	66.9	143	2	1	4.64	2	41.9	1.81	295	2	0.25	8.4	7.23	1.4	1.23	#NULL!	19.1	20
1	1920	2022-01-10 08:57:29	1	0	20.9573	77	3	male	1	1.72	62	No	Married	1	#NULL!	0	Other	0	0	0	0	0	0	0	0	67	1	40	#NULL!	5.62	3.37	60	146	2	1	4.5	2	43.8	1.58	133	2	0.16	11.9	#NULL!	#NULL!	#NULL!	#NULL!	8.4	24
1	1702	2022-01-10 10:07:10	1	0	22.2222	67	1	female	2	1.5	50	No	Married	1	#NULL!	0	Digestive System	4	1	1	0	1	0	0	0	74	2	41	#NULL!	3.99	1.97	49.4	106	1	1	4.3	2	33.7	1.62	233	2	0.23	9.6	#NULL!	#NULL!	#NULL!	#NULL!	5	12
1	1963	2022-01-12 09:17:35	1	0	21.2245	66	1	male	1	1.75	65	No	Married	1	#NULL!	0	Respiratory System	4	0	0	0	0	0	0	0	69	2	44	#NULL!	3.92	2.51	64.1	145	2	1	4.4	2	43.2	1.09	160	2	0.15	9	#NULL!	#NULL!	#NULL!	#NULL!	6.9	10
1	1874	2022-01-12 10:26:47	1	1	17.2248	74	2	male	1	1.58	43	No	Married	1	#NULL!	0	Digestive System	0	1	0	0	0	0	0	0	67	1	44	142	8.96	8.05	89.8	140	2	2	3.66	1	41	0.49	204	2	0.2	9.7	#NULL!	#NULL!	#NULL!	#NULL!	9.3	22
1	1923	2022-01-14 09:20:31	2	0	24.0055	88	5	male	1	1.62	63	No	Widowed	0	#NULL!	0	Reproductive System	0	0	1	0	0	1	0	0	65	1	41	#NULL!	6.68	4.38	65.6	142	2	1	4.55	2	43	1.56	170	2	0.19	11.3	#NULL!	#NULL!	#NULL!	#NULL!	12	15
1	1941	2022-01-14 09:35:32	1	0	26.1224	69	1	male	1	1.75	80	No	Married	1	#NULL!	0	Digestive System	0	0	1	0	0	0	0	0	80	2	50	#NULL!	4.84	2.8	57.8	131	2	1	3.96	1	38.5	1.66	248	2	0.19	7.5	#NULL!	#NULL!	#NULL!	#NULL!	5	20
1	1901	2022-01-14 09:55:04	1	0	24.8358	75	2	female	2	1.58	62	No	Married	1	#NULL!	0	Digestive System	4	0	0	0	0	0	0	1	60	1	34	#NULL!	4.32	3.05	70.6	145	2	2	4.5	2	42.9	0.32	114	2	0.11	9.7	#NULL!	#NULL!	#NULL!	#NULL!	20.9	87
1	1865	2022-01-14 10:14:23	1	0	22.9854	68	1	male	1	1.72	68	No	Married	1	#NULL!	0	Skin & Appendages	4	1	0	0	0	1	0	0	58	1	34	192	2.9	6.4	80.3	107	1	2	2.9	1	32	0.78	204	2	0.26	12.7	3.57	2.1	0.7	1	8.6	28
1	1968	2022-01-15 11:21:53	1	0	27.102	65	1	male	1	1.75	83	No	Married	1	#NULL!	0	Respiratory System	0	1	0	0	0	0	0	0	60	1	33	#NULL!	4.44	2.18	49.2	113	1	1	3.6	1	34.7	1.58	189	2	0.25	13	4.71	1.99	0.91	1	4.4	32
1	1954	2022-01-15 11:50:51	1	1	18.7328	79	3	male	1	1.65	51	No	Married	1	#NULL!	0	Digestive System	4	0	1	0	0	0	0	0	63	1	37	#NULL!	5.71	3.25	56.8	131	2	1	4.53	2	39.6	1.18	310	3	0.3	9.6	#NULL!	#NULL!	#NULL!	#NULL!	5.9	18
1	1938	2022-01-16 09:35:29	2	1	17.0656	72	2	female	2	1.55	41	No	Married	1	#NULL!	0	Reproductive System	0	1	0	0	0	0	0	0	70	2	40	#NULL!	1.56	0.84	53.8	118	1	1	4	1	35.2	0.65	203	2	0.19	9.1	#NULL!	#NULL!	#NULL!	#NULL!	16.9	35
1	1980	2022-01-16 10:37:45	2	0	23.4375	74	2	male	1	1.6	60	No	Married	1	#NULL!	0	Blood System	4	0	1	0	0	0	0	0	71	2	34	#NULL!	4.4	2.83	64.2	117	1	1	3.4	1	34.9	0.96	149	2	0.14	9.7	#NULL!	#NULL!	#NULL!	#NULL!	6.5	27
1	1987	2022-01-16 11:09:53	1	1	17.3134	82	4	male	1	1.63	46	No	Married	1	#NULL!	0	Respiratory System	4	0	0	0	0	0	0	0	60	1	32	#NULL!	6.2	4.78	77	144	2	2	4.59	2	42	0.63	150	2	0.16	10.4	4.81	1.91	1.29	1	5.8	14
1	1913	2022-01-17 09:59:00	2	0	22.8374	70	1	male	1	1.7	66	No	Married	1	#NULL!	0	Urinary System	0	0	1	0	0	0	0	0	77	2	45	#NULL!	13.57	11.05	81.5	142	2	2	5.15	2	44	1.61	149	2	0.14	9.3	#NULL!	#NULL!	#NULL!	#NULL!	12.3	27
1	1953	2022-01-17 11:26:56	1	1	15.625	69	1	male	1	1.6	40	No	Married	1	#NULL!	0	Other	0	0	1	0	0	0	0	0	70	2	38	#NULL!	6.24	4.76	76.1	138	2	2	4.63	2	41.8	1.07	224	2	0.18	7.9	4.86	0.71	1.25	0	5.8	9
1	1942	2022-01-18 09:25:01	2	0	21.9671	74	2	male	1	1.68	62	No	Married	1	#NULL!	0	Blood System	4	0	0	0	0	0	0	0	70	2	40	#NULL!	7.51	6.34	84.5	145	2	2	4.88	2	44.4	0.43	227	2	0.21	9.1	#NULL!	#NULL!	#NULL!	#NULL!	11	22
1	1960	2022-01-18 09:41:50	2	1	17.3134	65	1	male	1	1.63	46	No	Married	1	#NULL!	0	Digestive System	0	1	0	0	0	0	0	0	65	1	32	#NULL!	4.5	3.05	68	107	1	2	3.83	1	32.9	0.94	333	3	0.29	8.8	#NULL!	#NULL!	#NULL!	#NULL!	11.3	29
1	1971	2022-01-18 09:45:38	2	1	18.7783	69	1	male	1	1.68	53	No	Married	1	#NULL!	0	Digestive System	4	0	1	0	1	0	0	0	67	1	40	192	5.19	2.57	49.5	138	2	1	4.06	2	41.7	1.95	156	2	0.13	8.5	3.45	0.6	1.28	0	11.7	27
1	1897	2022-01-18 10:42:01	2	1	19.9184	74	2	male	1	1.75	61	No	Married	1	#NULL!	0	Digestive System	0	0	1	1	0	0	0	0	54	1	27	#NULL!	10.24	8.66	84.6	129	2	2	3.95	1	39.4	1.17	142	2	0.17	12	3.31	1.22	0.79	1	13.3	5
1	1939	2022-01-19 10:33:20	2	1	19.8141	79	3	male	1	1.62	52	No	Widowed	0	#NULL!	0	Respiratory System	0	0	1	0	0	1	0	0	56	1	37	#NULL!	5.75	4.42	76.9	130	2	2	4.06	2	39	0.96	197	2	0.18	9.3	#NULL!	#NULL!	#NULL!	#NULL!	4.6	28
1	1947	2022-01-20 09:32:03	2	1	19.5312	71	2	male	1	1.6	50	No	Married	1	#NULL!	0	Endocrine System	4	0	1	1	1	0	0	0	65	1	40	#NULL!	3.97	2.85	71.8	154	2	2	4.64	2	46.3	0.8	124	2	0.13	10.4	2.89	0.51	1.06	1	22.7	44
1	1935	2022-01-21 09:18:53	2	0	25.1096	70	1	female	2	1.48	55	No	Married	1	#NULL!	0	Reproductive System	4	0	0	0	0	0	0	0	68	1	42	#NULL!	2.57	1.43	55.4	99	1	1	2.97	1	29.2	0.93	167	2	0.15	9	#NULL!	#NULL!	#NULL!	#NULL!	11.7	9
1	1957	2022-01-21 10:01:04	1	1	19.9481	71	2	male	1	1.63	53	No	Other	3	#NULL!	0	Digestive System	4	0	0	0	0	0	0	0	69	2	37	#NULL!	6	1.76	40.1	102	1	1	1.2	1	31.9	0.98	49	1	0.05	9.3	3.3	0.97	0.87	1	16.8	26
1	1932	2022-01-21 11:11:30	2	1	17.301	74	2	male	1	1.7	50	No	Married	1	#NULL!	0	Respiratory System	0	0	0	0	0	0	0	0	58	1	33	#NULL!	5.03	2.75	54.6	108	1	1	4.1	2	33.6	1.66	250	2	0.22	8.6	4.26	0.88	1.09	1	7.2	15
1	1940	2022-01-21 12:49:45	1	0	26.449	84	4	male	1	1.75	81	No	Widowed	0	#NULL!	0	Digestive System	0	0	1	1	0	0	0	0	71	2	39	#NULL!	10.25	9.61	93.8	157	2	2	5.35	2	48	0.28	176	2	0.19	10.6	#NULL!	#NULL!	#NULL!	#NULL!	22.4	14
1	1990	2022-01-22 08:48:39	1	1	#NULL!	66	1	male	1	#NULL!	#NULL!	Yes	Married	1	#NULL!	0	Digestive System	4	0	0	0	0	0	0	0	69	2	38	185	6.24	3.7	59.3	124	2	1	3.78	1	36.7	1.83	377	3	0.32	8.4	5.46	1.16	1.46	#NULL!	5.8	11
1	2004	2022-01-22 10:10:29	1	0	21.9138	79	3	female	2	1.48	48	No	Married	1	#NULL!	0	Other	4	0	1	0	0	0	0	0	65	1	42	#NULL!	3.58	1.76	49.1	135	2	1	4.39	2	42	1.08	102	2	0.14	14	6.67	3.6	1.11	#NULL!	6	23
1	2059	2022-01-23 09:40:03	2	0	22.2222	67	1	female	2	1.5	50	No	Married	1	#NULL!	0	Digestive System	0	1	1	0	1	0	0	0	69	2	39	#NULL!	2.96	0.75	25.3	100	1	1	3.99	1	32.9	1.65	180	2	0.22	12.2	#NULL!	#NULL!	#NULL!	#NULL!	9.8	14
1	1999	2022-01-23 09:58:38	1	0	22.7732	74	2	male	1	1.65	62	No	Married	1	#NULL!	0	Blood System	4	0	1	0	0	0	0	0	67	1	34	#NULL!	3.58	1.91	53.3	114	1	1	3.31	1	33.6	1.19	137	2	0.14	10.3	#NULL!	#NULL!	#NULL!	#NULL!	6.5	26
1	2062	2022-01-23 09:59:13	1	0	24.974	70	1	male	1	1.55	60	No	Married	1	#NULL!	0	Digestive System	0	1	0	0	0	0	0	0	64	1	40	#NULL!	4.12	2.35	56.9	137	2	1	4.6	2	39.6	1.36	179	2	0.16	8.8	#NULL!	#NULL!	#NULL!	#NULL!	7.9	17
1	2019	2022-01-23 10:38:12	1	1	20.202	68	1	female	2	1.65	55	No	Married	1	#NULL!	0	Reproductive System	4	1	0	0	0	0	0	0	75	2	44	#NULL!	5.31	2.5	47.2	152	2	1	4.64	2	45.7	2.17	218	2	0.19	8.6	#NULL!	#NULL!	#NULL!	#NULL!	3.1	26
1	2041	2022-01-23 10:45:34	1	1	20.4382	70	1	male	1	1.67	57	No	Married	1	#NULL!	0	Respiratory System	4	0	1	1	1	0	0	0	63	1	37	#NULL!	5.93	4.43	74.7	141	2	2	4.41	2	40.9	0.87	110	2	0.1	8.7	2.89	0.58	1.14	1	12	9
1	1903	2022-01-23 10:45:55	1	0	24.4444	68	1	female	2	1.5	55	No	Married	1	#NULL!	0	Blood System	4	0	1	1	0	0	0	0	72	2	35	175	3.95	1.15	29.1	111	1	1	3.42	1	33.7	2.4	126	2	0.12	9.9	3.23	3.61	0.46	1	8.5	53
1	1967	2022-01-23 14:47:59	1	0	26.6728	67	1	female	2	1.62	70	No	Married	1	#NULL!	0	Respiratory System	4	0	1	0	0	1	0	0	68	1	35	#NULL!	1734.1	5.41	71.7	116	1	2	35.1	2	34.7	1.56	191	2	0.19	10	5.94	2.44	0.9	#NULL!	5.1	68
1	2011	2022-01-24 09:04:11	1	0	22.2656	88	5	male	1	1.6	57	No	Widowed	0	#NULL!	0	Digestive System	0	1	0	0	0	0	0	0	73	2	37	#NULL!	908.7	#NULL!	#NULL!	#NULL!	2	#NULL!	5.5	2	#NULL!	#NULL!	#NULL!	2	#NULL!	#NULL!	4.4	1.45	1.05	1	6.5	15
1	2016	2022-01-24 09:48:44	1	0	33.3333	77	3	female	2	1.5	75	No	Married	1	#NULL!	0	Respiratory System	0	0	1	1	1	1	0	0	76	2	46	#NULL!	4.97	3.21	64.5	147	2	1	4.81	2	42.9	1.37	132	2	0.17	12.8	3.97	2.32	0.92	1	7.9	41
1	1984	2022-01-24 13:04:00	1	0	22.8928	69	1	female	2	1.55	55	No	Other	3	#NULL!	0	Respiratory System	4	0	1	0	0	0	0	1	67	1	38	#NULL!	6.74	3.58	53.1	136	2	1	3.89	1	41.3	2.09	420	3	0.35	8.4	#NULL!	#NULL!	#NULL!	#NULL!	7.7	16
1	2034	2022-01-25 08:32:24	1	0	27.1111	71	2	male	1	1.5	61	No	Married	1	#NULL!	0	Digestive System	0	0	1	0	1	0	0	0	69	2	35	#NULL!	9.08	7.48	82.4	117	1	2	4.23	2	35	0.88	308	3	0.28	9	#NULL!	#NULL!	#NULL!	#NULL!	6.6	12
1	2053	2022-01-25 08:51:11	1	1	19.052	68	1	male	1	1.62	50	No	Married	1	#NULL!	0	Digestive System	4	0	0	0	0	0	0	0	52	1	28	115	4.09	2.22	54.5	75	1	1	3.4	1	24.7	1.57	141	2	0.11	8	3.02	0.8	0.78	1	4	6
1	2071	2022-01-25 09:45:38	2	1	19.5312	68	1	male	1	1.6	50	No	Married	1	#NULL!	0	Respiratory System	0	0	0	0	0	0	0	0	70	2	40	#NULL!	4.93	2.81	57	152	2	1	4.6	2	47	1.4	160	2	0.19	11.6	#NULL!	#NULL!	#NULL!	#NULL!	12.6	22
1	1945	2022-01-26 11:17:58	2	0	23.03	75	2	male	1	1.68	65	No	Married	1	#NULL!	0	Other	4	0	1	0	0	0	0	0	70	2	40	#NULL!	4.03	2.1	52.1	99	1	1	3.02	1	29.6	1.32	209	2	0.16	7.6	4.58	1.39	1.22	0	8.5	9
1	2035	2022-01-26 12:08:38	1	0	20.7612	69	1	male	1	1.7	60	No	Married	1	#NULL!	0	Respiratory System	0	0	0	0	0	0	0	1	64	1	36	#NULL!	8.58	6.04	70.3	149	2	2	4.63	2	43.8	1.73	294	2	0.28	9.6	5.48	1.13	0.81	#NULL!	9.4	17
1	1966	2022-01-27 08:56:48	1	1	17.4449	90	5	female	2	1.57	43	No	Widowed	0	#NULL!	0	Respiratory System	0	0	0	0	0	0	0	0	73	2	40	#NULL!	15.19	14.05	92.4	154	2	2	4.89	2	46.1	0.41	239	2	0.26	10.7	4.29	0.73	1.49	0	61.3	541
1	2040	2022-01-27 09:07:57	2	1	17.9151	79	3	male	1	1.72	53	No	Married	1	#NULL!	0	Urinary System	0	1	1	0	0	1	0	0	62	1	33	#NULL!	12.97	10.89	83.8	127	2	2	4.58	2	38.4	1.02	155	2	0.15	9.7	#NULL!	#NULL!	#NULL!	#NULL!	10.1	13
1	2082	2022-01-27 09:29:23	2	0	24.2188	73	2	female	2	1.6	62	No	Married	1	#NULL!	0	Other	4	0	1	0	0	0	0	1	53	1	28	#NULL!	7.95	6.13	77.2	105	1	2	3.64	1	32.6	0.65	183	2	0.19	10.4	3.14	1.31	1.01	1	5.1	7
1	2028	2022-01-27 09:41:58	1	0	26.6999	75	2	male	1	1.59	67.5	No	Other	3	#NULL!	0	Reproductive System	0	0	0	1	0	0	0	1	59	1	29	#NULL!	3.27	1.99	60.8	127	2	1	3.91	1	36.6	0.95	74	1	0.09	12.5	#NULL!	#NULL!	#NULL!	#NULL!	39.6	31
1	1878	2022-01-27 09:46:28	1	0	22.2656	70	1	male	1	1.6	57	No	Married	1	#NULL!	0	Urinary System	0	1	0	0	0	0	0	0	63	1	40	#NULL!	4.89	2.67	54.7	144	2	1	4.62	2	42.1	1.82	192	2	0.16	8.5	#NULL!	#NULL!	#NULL!	#NULL!	6.6	16
1	2080	2022-01-27 09:57:39	1	1	#NULL!	82	4	female	2	#NULL!	#NULL!	Yes	Married	1	#NULL!	0	Digestive System	4	0	1	0	1	0	0	0	69	2	38	#NULL!	7.66	5.84	76.2	115	1	2	3.68	1	34.4	1.03	250	2	0.23	9.1	#NULL!	#NULL!	#NULL!	#NULL!	27.2	22
1	2079	2022-01-27 10:08:51	2	0	21.4844	87	5	male	1	1.6	55	No	Married	1	#NULL!	0	Reproductive System	0	0	0	0	0	0	0	0	61	1	38	#NULL!	4.07	2.81	69	117	1	2	3.32	1	34	0.84	128	2	0.11	8.9	#NULL!	#NULL!	#NULL!	#NULL!	10.7	14
1	1917	2022-01-27 10:36:33	2	1	17.0656	72	2	female	2	1.55	41	No	Married	1	#NULL!	0	Reproductive System	0	1	0	0	0	1	0	0	60	1	30	#NULL!	11.65	10.87	93.3	97	1	2	3.22	1	28.6	0.46	168	2	0.18	11	2.7	1.02	0.5	1	37.3	112
1	2038	2022-01-27 15:29:03	1	0	22.3133	74	2	female	2	1.57	55	No	Married	1	#NULL!	0	Digestive System	4	0	1	0	0	0	0	0	74	2	35	#NULL!	7.46	5.15	69.1	121	2	1	4.64	2	37.6	1.79	269	2	0.24	8.8	4.5	1.08	0.87	1	8.8	21
1	2056	2022-01-28 08:44:07	1	1	17.5781	65	1	male	1	1.6	45	No	Married	1	#NULL!	0	Respiratory System	0	0	0	0	0	0	0	0	65	1	41	#NULL!	4.98	3.43	68.9	150	2	2	4.55	2	43.2	1.03	236	2	0.19	8	5.33	0.49	2.25	#NULL!	6.8	41
1	2020	2022-01-28 11:30:25	2	1	20.202	72	2	male	1	1.65	55	No	Married	1	#NULL!	0	Respiratory system	4	0	0	0	0	0	0	0	61	1	35	#NULL!	7.57	5.81	76.8	104	1	2	3.4	1	32.4	1.17	182	2	0.23	12.6	#NULL!	#NULL!	#NULL!	#NULL!	2.3	12
1	1976	2022-01-29 08:22:22	1	0	26.0262	84	4	female	2	1.64	70	No	Widowed	0	#NULL!	0	Reproductive System	0	0	1	1	0	0	0	0	59	1	35	#NULL!	6.6	3.82	57.8	135	2	1	4.23	2	39	2.09	223	2	0.24	10.5	5.04	2.7	1.03	1	24.4	16
1	2005	2022-01-29 09:01:43	1	1	#NULL!	82	4	female	2	1.58	#NULL!	Yes	Widowed	0	#NULL!	0	Digestive system	0	1	1	1	1	1	0	0	74	2	33	#NULL!	12.65	11.01	87.1	127	2	2	4.6	2	39.6	1.14	203	2	0.21	10.4	#NULL!	#NULL!	#NULL!	#NULL!	5.4	9
1	1978	2022-01-30 09:05:06	1	0	24.2188	69	1	female	2	1.6	62	No	Married	1	#NULL!	0	Reproductive system	0	0	1	0	0	0	0	0	80	2	41	#NULL!	5.46	3.64	66.8	141	2	1	4.42	2	42.7	1.25	141	2	0.2	14.3	5.12	1.09	1.58	0	6.1	21
1	1998	2022-01-30 09:14:46	1	1	#NULL!	71	2	male	1	#NULL!	#NULL!	Yes	Other	3	#NULL!	0	Digestive System	4	0	0	0	0	0	0	1	66	1	35	#NULL!	4.27	1.63	38.1	103	1	1	3.93	1	31.9	1.05	148	2	0.13	9	3.11	0.92	0.71	1	18.9	18
1	2022	2022-01-31 09:53:35	1	1	20.202	65	1	male	1	1.65	55	No	Married	1	#NULL!	0	Respiratory System	4	0	0	0	0	0	0	0	58	1	36	#NULL!	3.39	1.78	52.5	138	2	1	4.14	2	40.5	1.2	201	2	0.17	8.4	5.94	1.56	1.38	#NULL!	5.5	26
1	1770	2022-02-01 16:57:57	1	0	22.3478	74	2	female	2	1.54	53	No	Married	1	#NULL!	0	Digestive System	4	0	0	0	0	0	0	0	48	1	23	#NULL!	2	1.79	89.5	77	1	2	2.71	1	24.1	0.18	166	2	0.2	11.9	#NULL!	#NULL!	#NULL!	#NULL!	50.8	49
1	2049	2022-02-02 08:49:18	2	0	25.0135	68	1	male	1	1.72	74	No	Married	1	#NULL!	0	Respiratory System	0	0	0	0	0	0	0	0	63	1	33	#NULL!	5.1	#NULL!	#NULL!	#NULL!	1	#NULL!	0	1	#NULL!	#NULL!	#NULL!	1	#NULL!	#NULL!	#NULL!	#NULL!	#NULL!	#NULL!	21.2	20
1	2130	2022-02-03 09:16:36	1	1	18.2563	72	2	female	2	1.57	45	No	Married	1	#NULL!	0	Digestive System	4	0	0	0	0	0	0	0	69	2	32	#NULL!	7.81	6.32	80.9	106	1	2	3.98	1	32.9	0.8	538	3	0.47	8.7	#NULL!	#NULL!	#NULL!	#NULL!	13.1	31
1	2063	2022-02-03 10:27:17	2	0	23.3844	69	1	male	1	1.68	66	No	Married	1	#NULL!	0	Digestive System	0	0	0	0	0	1	0	0	53	1	29	108	35.07	33.62	95.9	135	2	2	3.58	1	38	0.96	23	1	0.03	11.7	4.24	3.92	0.18	1	46.3	137
1	1981	2022-02-04 08:40:32	1	1	#NULL!	72	2	female	2	1.57	#NULL!	Yes	Married	1	#NULL!	1	Reproductive System	4	0	0	0	0	1	0	0	52	1	24	#NULL!	14.2	13.61	95.8	94	1	2	3.06	1	27.6	0.31	115	2	0.1	9	#NULL!	#NULL!	#NULL!	#NULL!	30.5	42
1	1996	2022-02-04 11:13:01	1	1	20	74	2	male	1	1.5	45	No	Married	1	#NULL!	0	Respiratory System	4	0	1	0	0	0	0	1	61	1	28	#NULL!	17.19	15.05	87.4	151	2	2	4.73	2	45.3	1.3	326	3	0.3	9.2	#NULL!	#NULL!	#NULL!	#NULL!	7.4	19
1	2066	2022-02-04 13:32:57	1	0	22.2222	76	3	female	2	1.5	50	No	Married	1	#NULL!	0	Digestive System	0	1	0	0	0	0	0	0	60	1	38	#NULL!	6.71	4.69	69.9	141	2	2	4.64	2	40.6	1.1	234	2	0.23	9.9	4.07	1.05	0.97	1	19.2	16
1	2089	2022-02-06 09:18:59	2	0	23.5294	69	1	male	1	1.7	68	No	Married	1	#NULL!	0	Digestive System	0	0	0	0	0	0	0	0	61	1	33	#NULL!	23.87	23.53	98.6	132	2	#NULL!	3.56	1	39	0.22	186	2	0.19	10	#NULL!	#NULL!	#NULL!	#NULL!	159.5	121
1	2054	2022-02-07 14:07:31	1	0	26.1719	65	1	female	2	1.6	67	No	Other	3	#NULL!	0	Reproductive System	0	0	0	0	0	0	0	0	69	2	44	#NULL!	8.19	5.2	63.6	152	2	1	4.33	2	43.4	2.18	215	2	0.2	9.2	5.01	0.99	1.03	1	13.5	76
1	2052	2022-02-08 09:10:06	1	0	24	78	3	male	1	1.5	54	No	Married	1	#NULL!	0	Reproductive System	0	0	1	0	1	0	0	0	68	1	43	#NULL!	7.28	4.65	63.9	124	2	1	3.68	1	38	1.89	124	2	0.13	10.2	5.14	1.03	2.05	0	12.2	23
1	2144	2022-02-08 09:44:24	1	1	16.7657	82	4	female	2	1.62	44	No	Widowed	0	#NULL!	0	Digestive System	0	0	0	0	1	0	0	0	58	1	33	#NULL!	9.96	7.85	78.8	124	2	2	3.88	1	36	1.39	349	3	0.34	9.7	5.31	1.18	1.1	#NULL!	25.7	19
1	2158	2022-02-08 15:17:11	2	0	32.8731	70	1	female	2	1.56	80	No	Widowed	0	#NULL!	0	Digestive System	0	1	1	1	0	0	0	0	71	2	39	#NULL!	9.34	6.76	72.3	129	2	2	4.18	2	38.8	1.8	250	2	0.25	9.9	5	1.03	1.55	0	5	18
1	2129	2022-02-08 15:51:46	1	1	#NULL!	68	1	male	1	1.7	#NULL!	Yes	Married	1	#NULL!	0	Respiratory System	4	0	0	0	0	0	0	0	65	1	35	#NULL!	8.58	6.38	74.4	117	1	2	3.64	1	33.7	1.32	327	3	0.32	9.7	#NULL!	#NULL!	#NULL!	#NULL!	16.5	28
1	2140	2022-02-09 08:33:43	1	0	26.1427	75	2	male	1	1.54	62	No	Married	1	#NULL!	0	Blood System	4	0	0	0	0	1	0	0	65	1	38	#NULL!	3.01	1.78	59.1	146	2	1	4.33	2	42.9	0.82	176	2	0.16	8.9	#NULL!	#NULL!	#NULL!	#NULL!	7.5	13
1	2138	2022-02-09 09:02:48	1	1	16.609	66	1	male	1	1.7	48	No	Married	1	#NULL!	0	Digestive System	4	0	0	0	0	0	0	0	78	2	44	218	7.03	4.42	62.9	143	2	1	4.49	2	43.9	1.94	374	3	0.32	8.6	6.01	1.25	1.96	#NULL!	5.9	9
1	2136	2022-02-10 09:17:23	2	0	22.4913	66	1	male	1	1.7	65	No	Married	1	#NULL!	0	Respiratory System	4	0	0	0	0	0	0	0	66	1	43	#NULL!	4.92	3.37	68.3	145	2	1	4.58	2	44.1	1.11	134	2	0.13	9.3	#NULL!	#NULL!	#NULL!	#NULL!	4.9	13
1	2162	2022-02-10 09:17:30	2	0	24	71	2	female	2	1.5	54	No	Married	1	#NULL!	0	Reproductive System	4	0	1	0	0	0	0	0	65	1	40	#NULL!	5.48	3.97	72.6	96	1	2	2.99	1	29.5	1.02	178	2	0.17	9.4	#NULL!	#NULL!	#NULL!	#NULL!	15.2	10
1	2163	2022-02-10 09:51:14	1	0	22.2656	70	1	female	2	1.6	57	No	Married	1	#NULL!	0	Respiratory System	0	0	0	0	0	0	0	0	74	2	43	189	5.44	3.47	63.7	132	2	1	4.19	2	39.7	1.37	172	2	0.22	12.6	#NULL!	#NULL!	#NULL!	#NULL!	6.3	17
1	2141	2022-02-12 09:09:43	1	1	16.4366	67	1	female	2	1.56	40	No	Married	1	#NULL!	0	Reproductive System	4	0	0	0	0	0	0	0	70	2	39	184	3.24	2.18	67.5	123	2	1	3.83	1	37.6	0.78	102	2	0.1	10.1	5.03	1.22	1.14	1	8.2	10
1	2083	2022-02-12 10:37:20	2	1	17.5781	87	5	male	1	1.6	45	No	Married	1	#NULL!	0	Digestive System	0	0	0	0	0	0	0	1	70	2	40	#NULL!	12.76	11.96	93.8	127	2	2	5.04	2	40.5	0.38	389	3	0.3	7.6	#NULL!	#NULL!	#NULL!	#NULL!	10.4	12
1	2173	2022-02-12 10:41:32	2	1	#NULL!	68	1	male	1	1.65	#NULL!	Yes	Married	1	#NULL!	0	Digestive System	4	0	1	1	0	0	0	0	73	2	35	#NULL!	9.27	7.85	84.7	102	1	2	3.54	1	30	0.97	149	2	0.14	9.1	3.28	0.63	1.26	0	3.9	11
1	2148	2022-02-12 10:56:44	1	1	18.4425	65	1	male	1	1.63	49	No	Married	1	#NULL!	0	Digestive System	0	1	0	0	0	0	0	0	71	2	38	#NULL!	4.17	2.4	57.7	114	1	1	3.76	1	34.8	1.13	179	2	0.18	9.8	#NULL!	#NULL!	#NULL!	#NULL!	10.6	29
1	2105	2022-02-13 09:10:45	2	0	27.7551	65	1	male	1	1.75	85	No	Married	1	#NULL!	0	Respiratory System	0	1	0	0	0	0	0	0	61	1	36	#NULL!	6.51	3.82	58.8	113	1	1	3.54	1	34.7	1.92	262	2	0.29	11.1	5.2	1.81	1.2	1	6.2	35
1	2102	2022-02-14 08:53:34	1	0	24.281	72	2	male	1	1.71	71	No	Married	1	#NULL!	0	Reproductive System	0	0	1	0	0	0	0	0	74	2	42	#NULL!	7.62	4.91	64.4	159	2	1	5.03	2	48.2	2.09	360	3	0.4	11.1	#NULL!	#NULL!	#NULL!	#NULL!	14	27
1	2072	2022-02-14 10:43:04	1	1	19.5312	95	5	male	1	1.6	50	No	Married	1	#NULL!	0	Reproductive System	4	0	1	1	0	1	0	0	54	1	30	#NULL!	26.06	24.31	93.3	89	1	2	3.34	1	28	0.73	235	2	0.24	10.2	#NULL!	#NULL!	#NULL!	#NULL!	6.2	22
1	2139	2022-02-14 11:39:00	1	1	15.6225	76	3	female	2	1.58	39	No	Married	1	#NULL!	0	Respiratory system	4	0	0	0	0	0	0	0	66	1	38	#NULL!	6.34	5.28	83.2	108	1	2	3.29	1	31.7	0.54	225	2	0.22	9.9	4.31	2.15	0.64	1	11.7	34
1	2111	2022-02-15 09:04:53	2	0	22.7903	71	2	male	1	1.74	69	No	Married	1	#NULL!	0	Reproductive System	0	0	1	1	1	0	0	0	73	2	46	#NULL!	5.05	3.25	64.2	173	2	1	5.37	2	53	1.32	149	2	0.16	10.5	4.76	2.19	1.25	1	12.4	36
1	2073	2022-02-15 11:14:47	1	1	19.1111	84	4	female	2	1.5	43	No	Widowed	0	#NULL!	0	Digestive system	0	1	0	0	0	0	0	0	59	1	32	#NULL!	7.56	5.95	78.6	127	2	2	3.77	1	36.7	1.04	118	2	0.13	11.1	4.74	0.85	1.6	0	12.2	17
1	2085	2022-02-16 08:45:36	2	0	22.4323	68	1	female	2	1.58	56	No	Married	1	#NULL!	0	Respiratory system	0	0	1	1	1	1	0	0	75	2	44	#NULL!	212.1	2.28	42.7	110	1	1	20.1	2	33.3	2.75	162	2	0.15	9.3	#NULL!	#NULL!	#NULL!	#NULL!	15.4	18
1	2153	2022-02-16 09:12:33	2	1	15.4164	72	2	female	2	1.57	38	No	Widowed	1	#NULL!	1	Reproductive System	4	0	0	0	0	1	0	0	71	2	39	#NULL!	13.48	13.05	96.7	98	1	2	3.08	1	28.9	0.21	139	2	0.13	9.6	#NULL!	#NULL!	#NULL!	#NULL!	20.4	31
1	2220	2022-02-16 09:42:48	2	0	27.6304	74	2	female	2	1.51	63	No	Widowed	0	#NULL!	0	Reproductive System	4	0	0	0	0	0	0	0	68	1	40	#NULL!	7.48	4.98	66.7	137	2	1	4.37	2	40.3	1.97	235	2	0.21	9.1	#NULL!	#NULL!	#NULL!	#NULL!	17.2	14
1	2132	2022-02-16 10:15:36	1	1	15.427	68	1	male	1	1.65	42	No	Married	1	#NULL!	0	Respiratory system	4	0	0	0	0	0	0	0	59	1	29	#NULL!	7.73	6.55	84.8	91	1	2	2.98	1	28	0.39	255	2	0.22	8.6	3.34	0.78	1.29	0	7.5	20
1	2171	2022-02-16 10:32:57	2	1	20.202	68	1	female	2	1.65	55	No	Married	1	#NULL!	0	Reproductive System	0	1	0	0	0	0	0	0	76	2	47	#NULL!	5.95	3.38	56.7	149	2	1	4.5	2	44.3	2.19	202	2	0.17	8.2	#NULL!	#NULL!	#NULL!	#NULL!	4.8	24
1	2110	2022-02-16 15:09:29	1	0	23.8281	69	1	male	1	1.6	61	No	Married	1	#NULL!	0	Reproductive System	4	0	1	0	0	0	0	0	61	1	38	#NULL!	3.44	2.04	59	98	1	1	2.92	1	29.5	1.06	220	2	0.17	7.7	#NULL!	#NULL!	#NULL!	#NULL!	5.8	18
1	2181	2022-02-17 09:34:05	1	1	19.3625	69	1	male	1	1.67	54	No	Married	1	#NULL!	0	Digestive System	4	0	0	0	1	0	0	0	62	1	40	193	4.88	2.77	56.8	144	2	1	4.23	2	43.3	1.5	117	2	0.11	8.9	3.66	0.92	1.26	0	10.7	28
1	2170	2022-02-17 11:42:13	1	0	28.7197	74	2	male	1	1.7	83	No	Married	1	#NULL!	0	Respiratory system	4	0	1	0	0	0	0	0	76	2	43	#NULL!	9.78	6.72	68.6	159	2	1	4.57	2	46.7	2.2	276	2	0.25	9.2	#NULL!	#NULL!	#NULL!	#NULL!	11.8	10
1	2125	2022-02-17 15:30:46	1	1	20.5151	70	1	male	1	1.78	65	No	Married	1	#NULL!	0	Respiratory System	4	0	1	1	0	1	0	0	65	1	34	#NULL!	14.35	12.31	85.8	122	2	2	3.98	1	37.4	1.19	258	2	0.21	8.1	#NULL!	#NULL!	#NULL!	#NULL!	7.7	8
1	2244	2022-02-18 09:28:43	1	1	20.4152	79	3	male	1	1.7	59	No	Married	1	#NULL!	0	Urinary System	0	1	1	0	0	0	0	0	69	2	36	#NULL!	34.39	32.29	93.8	140	2	2	4.91	2	41	0.74	191	2	0.19	9.9	#NULL!	#NULL!	#NULL!	#NULL!	15.6	25
1	2258	2022-02-18 09:35:34	1	0	24.093	67	1	male	1	1.68	68	No	Married	1	#NULL!	0	Digestive System	0	1	0	1	0	0	0	0	71	2	43	194	5.4	2.59	48	176	2	1	5.4	2	52.6	2.26	119	2	0.16	13.4	4.29	1.04	0.96	1	10.6	17
1	2149	2022-02-18 10:35:01	1	1	19.0718	74	2	female	2	1.43	39	No	Married	1	#NULL!	0	Respiratory System	4	0	0	0	0	0	0	0	58	1	36	#NULL!	4.8	2.65	55.2	137	2	1	4.23	2	40.7	1.61	241	2	0.23	9.4	5.38	0.72	1.48	#NULL!	6.8	7
1	2230	2022-02-18 10:47:23	1	0	25.8065	70	1	male	1	1.55	62	No	Married	1	#NULL!	0	Digestive System	0	1	0	0	0	0	0	0	72	2	46	#NULL!	3.4	2.27	66.7	148	2	1	4.7	2	41.2	0.83	149	2	0.13	8.5	#NULL!	#NULL!	#NULL!	#NULL!	13.7	21
1	2117	2022-02-18 10:54:09	1	0	23.8754	75	2	male	1	1.7	69	No	Married	1	#NULL!	0	Other	0	0	1	0	0	0	0	0	64	1	38	#NULL!	9.72	7.62	78.4	94	1	2	2.83	1	28.6	1.32	146	2	0.12	8.4	3.91	1.24	1	1	9.1	9
1	2300	2022-02-18 10:58:27	1	0	22.8329	68	1	female	2	1.58	57	No	Married	1	#NULL!	0	Respiratory System	4	0	0	0	0	0	0	0	55	1	35	#NULL!	3.16	1.89	60	107	1	1	3.35	1	32.9	0.96	111	2	0.1	9.2	#NULL!	#NULL!	#NULL!	#NULL!	8.9	9
1	1992	2022-02-19 08:10:52	1	1	16.901	76	3	male	1	1.72	50	No	Married	1	#NULL!	1	Digestive System	4	0	1	0	0	1	0	0	65	1	28	#NULL!	8.95	8.02	89.7	112	1	2	3.77	1	33.2	0.36	260	2	0.2	7.5	#NULL!	#NULL!	#NULL!	#NULL!	15.5	12
1	2228	2022-02-19 08:57:57	1	1	19.1327	74	2	male	1	1.68	54	No	Married	1	#NULL!	0	Other	0	0	0	1	0	0	0	0	73	2	42	#NULL!	5.04	3.22	63.9	106	1	1	3.49	1	33	1.32	71	1	0.08	10.6	4.62	0.82	1.17	0	16.4	23
1	2239	2022-02-19 09:32:28	1	0	22.68	74	2	male	1	1.64	61	No	Married	1	#NULL!	0	Respiratory System	0	0	1	0	0	0	0	0	67	1	40	#NULL!	5.62	3.9	69.5	132	2	2	4.27	2	39.9	1.18	262	2	0.23	8.6	#NULL!	#NULL!	#NULL!	#NULL!	6.1	15
1	2199	2022-02-20 09:10:53	1	0	22.6757	74	2	male	1	1.68	64	No	Married	1	#NULL!	0	Blood System	4	0	0	0	0	0	0	0	65	1	41	#NULL!	2.5	2.64	53.8	142	2	1	0	2	42.1	1.24	193	2	0.19	9.8	#NULL!	#NULL!	#NULL!	#NULL!	9.4	24
1	2264	2022-02-20 10:02:53	2	0	22.2222	67	1	female	2	1.5	50	No	Married	1	#NULL!	0	Digestive System	0	1	1	0	1	0	0	0	70	2	38	#NULL!	4.26	2.03	47.6	105	1	1	4.06	2	32.3	1.83	166	2	0.17	10.4	#NULL!	#NULL!	#NULL!	#NULL!	7.6	17
1	2216	2022-02-20 10:37:08	2	0	26.079	74	2	male	1	1.65	71	No	Married	1	#NULL!	0	Digestive System	0	0	0	1	0	0	0	0	55	1	35	#NULL!	6.29	3.6	57.2	154	2	1	4.43	2	44.2	2.07	164	2	0.17	10.4	3.52	1.19	0.93	1	14.5	23
1	2279	2022-02-20 11:25:29	1	0	22.7204	69	1	male	1	1.73	68	No	Married	1	#NULL!	0	Other	0	0	1	1	1	0	0	0	68	1	43	#NULL!	7.31	4.19	57.3	157	2	1	4.81	2	46	2.2	121	2	0.13	10.6	3.61	1.78	0.79	1	12.1	38
1	2167	2022-02-20 11:40:38	2	0	21.2245	73	2	male	1	1.75	65	No	Widowed	0	#NULL!	0	Respiratory System	0	1	0	0	0	0	0	0	68	1	42	#NULL!	6.82	4.11	60.3	157	2	1	5.11	2	47.1	2.16	244	2	0.22	9.1	#NULL!	#NULL!	#NULL!	#NULL!	7.6	27
1	2151	2022-02-21 08:31:47	1	0	22.3133	67	1	female	2	1.57	55	No	Married	1	#NULL!	0	Respiratory System	0	0	0	0	0	0	0	0	79	2	52	#NULL!	5.55	3.5	63.1	160	2	1	5.31	2	48.6	1.54	250	2	0.24	9.6	6.65	2.78	1.3	#NULL!	9.8	27
1	2213	2022-02-21 09:24:14	1	1	19.721	70	1	male	1	1.67	55	No	Other	3	#NULL!	0	Respiratory System	4	1	1	1	0	0	0	0	58	1	33	#NULL!	2.82	1.49	52.9	125	2	1	4.01	2	36.7	0.85	107	2	0.1	9	3.25	0.67	1.07	1	6.3	17
1	2247	2022-02-21 09:25:09	1	1	19.5312	66	1	female	2	1.6	50	No	Married	1	#NULL!	0	Respiratory System	0	0	1	0	0	0	0	0	53	1	34	#NULL!	11.9	4.68	67.6	116	1	1	20.7	2	35.8	1.62	191	2	0.2	10.4	#NULL!	#NULL!	#NULL!	#NULL!	11.9	11
1	2128	2022-02-21 11:35:02	1	0	25.1532	69	1	female	2	1.57	62	No	Married	1	#NULL!	0	Reproductive System	0	1	0	0	0	0	0	0	72	2	38	#NULL!	14.76	12.8	86.7	138	2	2	4.32	2	41.1	1.06	215	2	0.24	11.3	#NULL!	#NULL!	#NULL!	#NULL!	11.9	12
1	2222	2022-02-21 12:55:32	1	0	24.2439	65	1	female	2	1.56	59	No	Widowed	0	#NULL!	0	Respiratory system	0	0	0	0	0	0	0	0	71	2	43	#NULL!	6.49	3.47	53.3	153	2	1	5.16	2	46.4	2.51	266	2	0.27	10.1	5.41	1.3	1.62	#NULL!	16.1	26
1	2194	2022-02-21 15:59:31	1	1	20.2395	75	2	female	2	1.54	48	No	Married	1	#NULL!	0	Respiratory system	0	0	0	0	0	0	0	0	71	2	43	#NULL!	7.59	4.87	64.2	150	2	1	4.39	2	45.7	2.11	197	2	0.22	10.9	5.29	1.91	2.09	#NULL!	8.1	29
1	2302	2022-02-22 09:14:28	1	0	22.9398	72	2	female	2	1.52	53	No	Married	1	#NULL!	0	Respiratory System	4	1	0	0	0	1	0	0	75	2	45	#NULL!	4.68	2.05	43.7	128	2	1	4.08	2	38.2	1.83	155	2	0.14	8.9	5.24	1.27	1.87	#NULL!	9.5	14
1	2152	2022-02-22 09:32:02	1	1	20.1362	71	2	male	1	1.63	53.5	No	Married	1	#NULL!	0	Digestive system	4	0	0	0	0	0	0	0	68	1	38	#NULL!	2.7	1.4	40.8	110	1	1	1.4	1	34.4	0.85	61	1	0.06	9.4	3.36	0.83	0.98	1	16	24
1	2276	2022-02-22 09:51:07	1	0	23.3844	73	2	male	1	1.68	66	No	Married	1	#NULL!	0	Reproductive System	0	0	0	0	0	0	0	0	75	2	44	#NULL!	6.05	3.22	53.2	156	2	1	4.59	2	43.1	2.23	142	2	0.15	10.3	#NULL!	#NULL!	#NULL!	#NULL!	17.2	19
1	2287	2022-02-23 08:27:27	1	0	25.721	75	2	male	1	1.54	61	No	Married	1	#NULL!	0	Blood System	4	0	0	0	0	0	0	0	69.1	2	39.3	#NULL!	6.24	4.15	66.5	152	2	2	4.62	2	47	0.91	182	2	0.17	9.6	#NULL!	#NULL!	#NULL!	#NULL!	16.5	27
1	2250	2022-02-23 09:30:00	1	0	22.6562	72	2	male	1	1.6	58	No	Other	3	#NULL!	0	Digestive System	0	0	1	0	0	0	0	0	58	1	38	#NULL!	11.09	8	72.1	164	2	2	4.28	2	48.9	2.26	144	2	0.14	9.7	6.84	4.74	1.78	#NULL!	22.2	16
1	2252	2022-02-23 10:37:37	1	1	16.6493	77	3	female	2	1.55	40	No	Married	1	#NULL!	0	Digestive System	0	0	1	0	0	1	0	0	63	1	38	#NULL!	690.7	3.16	59.7	119	1	1	26528.9	2	36.3	1.38	212	2	0.2	9.6	#NULL!	#NULL!	#NULL!	#NULL!	8.9	11
1	2241	2022-02-23 12:29:21	2	0	21.0772	76	3	male	1	1.63	56	No	Married	1	#NULL!	0	Respiratory System	4	0	0	0	0	0	0	1	75	2	36	#NULL!	3.3	2.48	75.2	154	2	2	4.57	2	47	0.46	166	2	0.16	9.6	#NULL!	#NULL!	#NULL!	#NULL!	15.3	20
1	2212	2022-02-23 14:36:16	1	1	18.7305	82	4	male	1	1.55	45	No	Married	1	#NULL!	0	Digestive System	0	0	0	0	0	0	0	1	64	1	34	61	8.69	6.52	75	177	2	2	5.88	2	52	1.65	145	2	0.14	10	3.3	0.72	0.99	1	28.9	31
1	2156	2022-02-23 17:17:28	1	1	16.8525	69	1	male	1	1.67	47	No	Married	1	#NULL!	0	Respiratory System	4	0	0	0	0	1	0	0	59	1	36	#NULL!	16.5	9.29	77.9	162	2	2	24.6	2	49	1.53	183	2	0.18	9.8	5.06	0.77	1.72	0	21.9	190
1	2177	2022-02-24 09:47:10	2	0	28.4444	73	2	female	2	1.5	64	No	Married	1	#NULL!	0	Other	0	0	0	0	0	0	0	0	71	2	40	#NULL!	4.46	2.63	59.1	144	2	1	4.2	2	43	1.17	229	2	0.2	8.9	5.3	1.07	0.99	#NULL!	4.1	33
1	2133	2022-02-24 11:07:16	1	0	21.4844	83	4	male	1	1.6	55	No	Other	3	#NULL!	0	Digestive System	4	0	1	0	0	0	0	1	59	1	35	#NULL!	3.88	3.23	83.2	122	2	2	3.8	1	34.9	0.35	112	2	0.1	9.2	#NULL!	#NULL!	#NULL!	#NULL!	24.7	75
1	2374	2022-02-24 11:13:16	2	0	26.7755	70	1	male	1	1.75	82	No	Married	1	#NULL!	0	Digestive System	0	0	1	0	0	0	0	0	84.8	2	50.5	#NULL!	5.84	3.29	56.2	127	2	1	3.91	1	36.9	2.08	298	2	0.22	7.5	#NULL!	#NULL!	#NULL!	#NULL!	7.2	13
1	2175	2022-02-25 08:58:29	1	0	25	86	5	female	2	1.4	49	No	Widowed	0	#NULL!	0	Respiratory	0	0	1	1	0	0	0	0	70	2	35	#NULL!	14.35	11.96	83.1	129	2	2	4.26	2	38.7	1.34	491	3	0.46	9.3	4.59	2.47	0.83	1	5.7	19
1	2198	2022-02-25 10:20:01	1	0	23.8751	69	1	male	1	1.65	65	No	Married	1	#NULL!	0	Respiratory System	0	0	1	0	0	0	0	0	75	2	44	#NULL!	5.79	3.9	67.3	155	2	1	4.78	2	46.2	1.22	277	2	0.27	9.8	5.13	0.85	1.25	0	10.8	24
1	2353	2022-02-26 08:38:36	1	1	16.609	66	1	male	1	1.7	48	No	Married	1	#NULL!	0	Digestive System	4	0	0	0	0	0	0	0	84.2	2	45.6	252	7.34	4.42	60.1	144	2	1	4.65	2	43.4	2.35	449	3	0.36	7.9	6.39	1.25	2.14	#NULL!	5.4	14
1	2275	2022-02-26 09:44:14	2	1	19.7232	69	1	male	1	1.7	57	No	Married	1	#NULL!	0	Urinary System	0	0	1	1	0	1	0	0	71	2	38	#NULL!	390.3	3.62	47.9	147	2	1	28.8	2	43.3	3.1	243	2	0.27	11.2	#NULL!	#NULL!	#NULL!	#NULL!	9.2	31
1	2317	2022-02-26 09:54:40	1	0	22.0604	68	1	female	2	1.55	53	No	Married	1	#NULL!	0	Reproductive System	0	0	0	0	0	0	0	0	72.7	2	44.5	#NULL!	6.87	4.67	67.9	136	2	1	4.28	2	40	1.89	332	3	0.35	10.4	#NULL!	#NULL!	#NULL!	#NULL!	11.5	26
1	2356	2022-02-26 10:10:28	2	0	25.8166	80	3	male	1	1.67	72	No	Married	1	#NULL!	0	Reproductive System	4	0	0	0	0	0	0	0	65.8	1	41.5	#NULL!	9.31	6.75	72.5	132	2	1	3.91	1	36.9	2.09	249	2	0.21	8.3	#NULL!	#NULL!	#NULL!	#NULL!	18.7	18
1	2235	2022-02-27 09:22:10	1	0	25.763	66	1	male	1	1.74	78	No	Other	3	#NULL!	0	Digestive System	4	1	1	0	0	0	0	0	59	1	24	#NULL!	10.81	8.88	82.1	131	2	2	4.3	2	38.3	1.09	395	3	0.36	9	#NULL!	#NULL!	#NULL!	#NULL!	55.6	172
1	2289	2022-02-27 09:30:32	1	0	27.5862	82	4	female	2	1.45	58	No	Married	1	#NULL!	0	Digestive System	0	0	1	1	0	0	0	0	65.7	1	33.5	#NULL!	23.03	21.21	92.1	131	2	2	4.28	2	40.2	1.25	157	2	0.18	11.3	3.49	0.9	0.94	1	25.1	8
1	2284	2022-02-28 09:33:08	1	1	16.5289	87	5	male	1	1.65	45	No	Remarried	1	#NULL!	0	Digestive System	0	0	1	0	1	0	0	0	57.5	1	32.8	#NULL!	5.41	3.97	73.1	107	1	2	4.24	2	34.8	0.98	244	2	0.21	8.6	4.81	1.39	0.81	1	8.3	9
1	2262	2022-02-28 11:27:27	2	0	20.8325	72	2	male	1	1.61	54	No	Married	1	#NULL!	0	Respiratory System	4	1	0	0	0	0	0	0	63.3	1	35.4	#NULL!	6.1	4.29	70.1	143	2	2	4.3	2	41.1	1.15	216	2	0.19	8.9	#NULL!	#NULL!	#NULL!	#NULL!	6.6	7
1	2256	2022-03-01 09:17:20	1	1	#NULL!	85	4	female	2	1.54	#NULL!	Yes	Widowed	0	#NULL!	0	Respiratory System	0	0	1	0	0	1	0	0	53.5	1	29.8	#NULL!	11.63	10.75	92.5	140	2	2	4.7	2	41	0.49	196	2	0.21	10.6	#NULL!	#NULL!	#NULL!	#NULL!	16.2	18
1	2277	2022-03-01 09:37:47	1	0	22.2222	83	4	male	1	1.5	50	No	Married	1	#NULL!	0	Respiratory System	0	0	1	0	0	0	0	0	74	2	44	#NULL!	6.79	5.18	76.3	122	2	2	3.66	1	36	0.93	235	2	0.19	8	#NULL!	#NULL!	#NULL!	#NULL!	6.9	12
1	2322	2022-03-01 10:25:43	2	1	#NULL!	75	2	female	2	1.51	#NULL!	Yes	Other	3	#NULL!	1	Digestive System	4	1	0	0	0	0	0	0	58.1	1	28.4	#NULL!	6.26	5.01	80	93	1	2	3.31	1	27.8	0.84	179	2	0.18	9.7	#NULL!	#NULL!	#NULL!	#NULL!	11.2	11
1	2320	2022-03-02 09:27:20	1	1	14.6924	73	2	male	1	1.65	40	No	Married	1	#NULL!	1	Digestive System	4	0	0	0	0	0	0	0	64.4	1	31.3	#NULL!	9.52	8.3	87.2	119	1	2	3.98	1	35.3	0.95	303	3	0.26	8.5	#NULL!	#NULL!	#NULL!	#NULL!	9.9	22
1	2124	2022-03-02 09:33:12	2	0	26.8386	74	2	male	1	1.58	67	No	Married	1	#NULL!	0	Respiratory System	0	1	1	0	0	1	0	0	64	1	40	#NULL!	14.08	12.82	91	156	2	2	4.65	2	45	0.85	201	2	0.2	10	#NULL!	#NULL!	#NULL!	#NULL!	6.5	24
1	2201	2022-03-02 10:26:21	1	1	14.3251	85	4	male	1	1.65	39	No	Married	1	#NULL!	0	Respiratory System	0	0	0	0	0	0	0	1	67.2	1	33.9	#NULL!	6.97	5.98	85.8	144	2	2	5.12	2	43.8	0.41	356	3	0.34	9.5	4.51	1.61	0.61	1	9.8	14
1	2288	2022-03-02 16:43:30	2	0	26.6667	71	2	male	1	1.5	60	No	Widowed	0	#NULL!	0	Digestive System	0	0	1	0	0	0	0	1	57.1	1	30.1	#NULL!	6.22	5.75	92.5	119	1	2	4.32	2	34.2	0.26	272	2	0.22	8.2	#NULL!	#NULL!	#NULL!	#NULL!	14.2	11
1	2377	2022-03-03 09:26:44	1	1	19.1953	76	3	male	1	1.63	51	No	Married	1	#NULL!	0	Respiratory System	4	0	0	0	0	0	0	1	61.9	1	33.4	#NULL!	3.3	2.4	73	127	2	2	3.92	1	37.8	0.47	159	2	0.14	8.7	#NULL!	#NULL!	#NULL!	#NULL!	9.9	28
1	2354	2022-03-03 10:00:05	1	0	26.3702	77	3	female	2	1.57	65	No	Widowed	1	#NULL!	0	Reproductive System	0	0	0	0	1	0	0	0	72.9	2	41.1	#NULL!	7.95	5.62	70.6	119	1	2	5.49	2	35.4	1.53	235	2	0.27	11.4	3.27	0.89	0.89	1	15.2	30
1	2324	2022-03-03 10:19:08	1	1	15.1796	76	3	female	2	1.54	36	No	Widowed	0	#NULL!	0	Digestive System	0	1	1	0	0	0	0	0	62.8	1	36.3	#NULL!	4.29	2.83	66.1	96	1	1	3.31	1	29.2	1.18	314	3	0.26	8.3	#NULL!	#NULL!	#NULL!	#NULL!	2.6	14
1	2155	2022-03-04 09:25:44	2	1	15.2416	91	5	female	2	1.62	40	No	Widowed	0	#NULL!	0	Other	0	1	0	0	0	0	0	0	67.9	1	32.3	#NULL!	11.03	10.13	92	145	2	2	4.64	2	42.9	0.51	347	3	0.34	9.9	3	0.58	0.97	1	57.8	428
1	2360	2022-03-04 09:59:55	2	1	20.3074	84	4	male	1	1.69	58	No	Married	1	#NULL!	0	Respiratory System	4	0	1	0	1	0	0	0	58	1	21.3	#NULL!	5.54	2.8	50.7	136	2	1	4.53	2	38.9	0.98	249	2	0.29	11.7	3.91	1.27	0.98	1	8.3	5
1	2359	2022-03-04 10:23:03	1	0	23.0469	75	2	female	2	1.6	59	No	Married	1	#NULL!	0	Respiratory System	0	0	0	0	0	0	0	0	63.8	1	35.5	#NULL!	5.48	2.86	52.2	126	2	1	3.97	1	37	2	174	2	0.2	11.6	#NULL!	#NULL!	#NULL!	#NULL!	19.7	15
1	2121	2022-03-04 10:27:34	1	0	21.6413	72	2	female	2	1.52	50	No	Married	1	#NULL!	0	Digestive System	0	0	1	0	0	0	0	0	62	1	36	#NULL!	4.47	2.35	52.5	133	2	1	3.43	1	38.3	1.55	91	1	0.11	11.9	#NULL!	#NULL!	#NULL!	#NULL!	12.3	19
1	2364	2022-03-05 08:50:33	2	0	21.2245	66	1	male	1	1.75	65	No	Married	1	#NULL!	0	Respiratory System	4	0	0	0	0	0	0	0	66.3	1	42.2	#NULL!	4.5	3.06	68	142	2	1	4.46	2	41.2	1	140	2	0.15	11	#NULL!	#NULL!	#NULL!	#NULL!	8.8	13
1	2142	2022-03-06 09:12:06	1	1	19.9792	66	1	female	2	1.55	48	No	Widowed	0	#NULL!	0	Digestive System	4	1	0	0	0	1	0	0	63	1	35	#NULL!	6.91	5.24	75.9	117	1	2	4.01	2	36	1.32	251	2	0.28	11.1	5.17	1.24	0.95	1	3.9	11
1	2427	2022-03-07 08:59:24	1	0	25.8022	80	3	female	2	1.46	55	No	Widowed	0	#NULL!	0	Reproductive System	0	1	1	0	0	0	0	0	72	2	41.6	#NULL!	14.15	12	84.7	150	2	2	4.6	2	43.1	0.81	234	2	0.26	11.1	#NULL!	#NULL!	#NULL!	#NULL!	16.9	25
1	2372	2022-03-07 09:43:16	1	0	24.4444	78	3	female	2	1.5	55	No	Widowed	0	#NULL!	0	Respiratory System	0	1	0	0	0	1	0	0	82.3	2	40.1	#NULL!	12.17	10.47	86	157	2	2	5.34	2	47.6	1.41	283	2	0.27	9.7	6.3	0.73	#NULL!	#NULL!	9.8	14
1	2351	2022-03-07 10:14:17	1	0	23.3887	75	2	male	1	1.73	70	No	Married	1	#NULL!	0	Respiratory System	0	0	1	1	0	0	0	0	59.9	1	37.5	#NULL!	5.46	2.58	47.2	146	2	1	4.69	2	41.5	2.3	213	2	0.21	9.9	#NULL!	#NULL!	#NULL!	#NULL!	5.5	18
1	2414	2022-03-07 14:55:31	1	1	19.6283	65	1	male	1	1.58	49	No	Married	1	#NULL!	0	Respiratory System	4	0	0	0	0	0	0	0	59.5	1	37.7	#NULL!	7.28	4.77	65.6	142	2	1	4.25	2	39.3	1.49	292	2	0.25	8.5	5.82	1.35	1.66	#NULL!	6.2	22
1	2407	2022-03-08 09:37:37	1	0	27.1111	67	1	female	2	1.5	61	No	Married	1	#NULL!	0	Digestive System	0	0	0	0	0	0	0	0	67.6	1	33.9	#NULL!	6.3	4.09	64.9	68	1	1	3.61	1	23.6	1.61	370	3	0.33	8.9	3.94	1.51	#NULL!	0	5.5	10
1	2447	2022-03-08 09:41:30	1	0	24.4444	69	1	female	2	1.5	55	No	Married	1	#NULL!	0	Digestive System	4	0	1	0	0	0	0	0	69.8	2	39.4	290	6.86	3.63	52.9	145	2	1	4.66	2	41.6	2.6	173	2	0.15	8.7	3.84	1.61	1.03	1	11.5	11
1	2323	2022-03-08 10:10:56	1	0	20.9573	68	1	male	1	1.72	62	No	Married	1	#NULL!	0	Respiratory System	4	0	1	0	0	0	0	0	66.8	1	32.4	144	4.06	2.73	67.3	96	1	2	3.29	1	28.3	0.75	19	1	0.02	10.2	3.72	0.74	0.82	1	7.5	20
1	2263	2022-03-08 10:14:31	1	1	17.1875	71	2	female	2	1.6	44	No	Married	1	#NULL!	0	Respiratory system	0	0	0	0	0	0	0	0	72.3	2	42.2	#NULL!	7.17	5.22	72.8	141	2	2	4.02	2	42	1.39	243	2	0.25	10.4	5.2	3.11	0.88	1	5.4	18
1	2269	2022-03-09 08:27:01	2	0	26.9896	66	1	male	1	1.7	78	No	Married	1	#NULL!	0	Respiratory System	4	0	1	1	0	0	0	0	63.1	1	40.9	#NULL!	6.56	4.55	69.4	143	2	2	4.52	2	40.7	1.1	178	2	0.18	10	#NULL!	#NULL!	#NULL!	#NULL!	9.6	9
1	2396	2022-03-09 09:27:25	1	1	19.2234	74	2	female	2	1.53	45	No	Married	1	#NULL!	0	Digestive System	0	1	0	0	0	0	0	0	68.1	2	43.3	#NULL!	7.6	5.12	67.2	141	2	1	4.51	2	40.4	2.1	220	2	0.19	8.7	5.36	0.66	1.69	#NULL!	10.9	18
1	2267	2022-03-09 10:42:57	1	0	24.3046	71	2	male	1	1.61	63	No	Other	3	#NULL!	0	Digestive System	0	0	0	0	0	0	0	0	74.3	2	46.1	226	4.67	2.74	58.9	164	2	1	5.29	2	48.1	1.48	196	2	0.2	10.1	4.54	0.9	1.26	0	12	31
1	2395	2022-03-10 08:36:50	1	1	19.721	69	1	male	1	1.67	55	No	Married	1	#NULL!	0	Digestive System	4	0	0	0	1	0	0	0	62.4	1	40.1	177	4.14	2.35	57.1	144	2	1	4.06	2	40	1.22	106	2	0.09	8.2	3.36	0.86	1.24	0	8.8	26
1	2411	2022-03-10 08:50:16	1	0	22.4088	74	2	male	1	1.78	71	No	Married	1	#NULL!	0	Digestive System	0	0	0	0	0	0	0	0	53.6	1	28.9	#NULL!	5.86	3.87	66.1	97	1	1	3.73	1	29.4	1.6	253	2	0.24	9.3	3.51	1.06	#NULL!	0	4.8	22
1	2446	2022-03-10 09:54:27	2	0	25.7812	74	2	male	1	1.6	66	No	Married	1	#NULL!	0	Digestive System	0	1	0	0	0	0	0	0	82.7	2	45.3	#NULL!	4.45	3.2	72.2	124	2	2	3.75	1	35.9	0.89	185	2	0.21	11.4	#NULL!	#NULL!	#NULL!	#NULL!	11.2	25
1	2418	2022-03-10 10:27:27	1	1	17.6471	65	1	male	1	1.7	51	No	Married	1	#NULL!	0	Digestive System	0	1	0	0	0	0	0	0	68.5	2	35.6	#NULL!	4.22	2.35	55.7	116	1	1	3.6	1	33.7	1.22	189	2	0.17	8.9	#NULL!	#NULL!	#NULL!	#NULL!	10.5	26
1	2383	2022-03-10 10:29:36	2	0	25.3906	69	1	male	1	1.6	65	No	Married	1	#NULL!	0	Reproductive System	4	0	1	0	0	0	0	0	66.3	1	40.6	#NULL!	5.08	2.81	55.2	112	1	1	3.5	1	33.9	1.76	274	2	0.22	7.9	#NULL!	#NULL!	#NULL!	#NULL!	6.2	15
1	2169	2022-03-10 10:51:02	1	1	19.563	69	1	male	1	1.55	47	No	Married	1	#NULL!	0	Digestive System	0	0	0	0	0	1	0	0	69	2	37	#NULL!	1100	6.7	67	144	2	1	23.7	2	44	2.41	253	2	0.23	9.3	3.32	1.22	0.82	1	9.9	8
1	2426	2022-03-11 09:41:14	1	0	27.1809	73	2	male	1	1.65	74	No	Married	1	#NULL!	0	Respiratory System	0	0	1	0	0	0	0	0	82.4	2	47.6	#NULL!	4.32	2.43	56.3	196	2	1	5.55	2	59	1.27	165	2	0.16	9.7	4.66	0.79	1.83	0	33	33
1	2379	2022-03-11 09:42:37	1	1	19.487	73	2	male	1	1.68	55	No	Married	1	#NULL!	0	Respiratory System	0	0	0	0	0	0	0	0	60.1	1	19.3	#NULL!	10.64	8.74	82.2	89	1	2	3.24	1	28	0.99	399	3	0.34	8.6	1.83	0.32	0.43	1	4.1	48
1	2334	2022-03-11 10:14:26	1	1	17.5278	82	4	female	2	1.62	46	No	Married	1	#NULL!	0	Digestive System	4	0	1	0	1	0	0	0	56.7	1	29.7	#NULL!	6.17	4.67	75.8	107	1	2	3.49	1	30.9	0.9	299	2	0.29	9.7	#NULL!	#NULL!	#NULL!	#NULL!	20.3	16
1	2368	2022-03-11 10:39:09	2	0	23.8751	77	3	male	1	1.65	65	No	Married	1	#NULL!	0	Respiratory System	0	0	1	0	0	1	0	1	63.3	1	38.6	#NULL!	4	#NULL!	#NULL!	#NULL!	1	#NULL!	0	1	#NULL!	#NULL!	#NULL!	1	#NULL!	#NULL!	3.66	0.54	1.28	0	14.8	30
1	2517	2022-03-12 00:29:02	1	1	#NULL!	75	2	female	2	1.52	#NULL!	Yes	Widowed	0	#NULL!	1	Digestive System	0	1	0	0	0	1	0	1	49.8	1	23.4	#NULL!	10.24	9.35	91.3	71	1	2	2.56	1	21.1	0.51	348	3	0.31	9	#NULL!	#NULL!	#NULL!	#NULL!	32.7	46
1	2509	2022-03-12 08:38:31	1	0	24.0055	74	2	male	1	1.62	63	No	Married	1	#NULL!	0	Blood System	4	0	0	0	0	0	0	0	73.3	2	33.6	#NULL!	5.13	2.73	53.3	120	1	1	3.65	1	35.1	1.82	160	2	0.14	8.8	#NULL!	#NULL!	#NULL!	#NULL!	5.6	14
1	2431	2022-03-12 09:07:40	1	0	25.7657	79	3	male	1	1.66	71	No	Married	1	#NULL!	0	Digestive System	0	0	1	1	0	0	0	0	72.7	2	41.2	#NULL!	17.27	15.17	87.8	147	2	2	4.44	2	42	1.19	176	2	0.17	9.8	5.91	1.74	1.25	#NULL!	9.4	23
1	2464	2022-03-12 09:42:53	1	0	20.5693	79	3	male	1	1.65	56	No	Married	1	#NULL!	0	Reproductive System	4	0	0	0	0	0	0	0	70	2	39.2	#NULL!	3.6	3.68	61.8	112	1	1	0	1	32.3	1.52	251	2	0.26	10.3	#NULL!	#NULL!	#NULL!	#NULL!	3.4	17
1	2443	2022-03-12 11:19:42	1	1	16.8242	67	1	female	2	1.58	42	No	Widowed	1	#NULL!	0	Respiratory System	4	0	0	0	0	0	0	1	55.2	1	28.3	#NULL!	11.79	8.97	75.9	105	1	2	4.09	2	32.4	1	289	2	0.23	7.9	4.18	0.7	1.14	1	6.6	7
1	2367	2022-03-13 08:32:12	2	0	27.3438	84	4	female	2	1.6	70	No	Widowed	0	#NULL!	0	Reproductive System	0	0	1	1	0	0	0	0	60.3	1	34.3	#NULL!	6.56	3.81	58	134	2	1	4.27	2	40	2.07	201	2	0.22	10.9	5.01	4.42	0.82	1	19.8	9
1	2430	2022-03-13 09:13:00	1	0	22.8928	76	3	female	2	1.55	55	No	Widowed	0	#NULL!	0	Digestive System	4	0	0	0	0	0	0	1	64.6	1	30.6	#NULL!	12.17	9.41	77.3	127	2	2	4.23	2	37.1	1.52	253	2	0.25	10	#NULL!	#NULL!	#NULL!	#NULL!	18.9	19
1	2493	2022-03-13 10:26:26	1	1	20.202	68	1	female	2	1.65	55	No	Married	1	#NULL!	0	Reproductive System	0	1	0	0	0	0	0	0	80.1	2	46	#NULL!	5.19	2.37	45.6	153	2	1	4.56	2	43.3	2.46	241	2	0.2	8.2	#NULL!	#NULL!	#NULL!	#NULL!	4.8	24
1	2370	2022-03-13 10:43:21	1	0	22.8928	65	1	female	2	1.55	55	No	Married	1	#NULL!	0	Respiratory system	0	0	1	0	0	0	0	0	73.3	2	41.4	#NULL!	7.43	5.16	69.5	154	2	1	4.81	2	44.9	1.71	233	2	0.24	10.3	5.55	0.68	1.48	#NULL!	11.9	20
1	2146	2022-03-13 10:45:16	1	0	23.6128	75	2	female	2	1.54	56	No	Other	3	#NULL!	0	Respiratory System	4	0	1	1	1	0	0	0	64	1	37	410	8.31	6.2	74.5	136	2	2	4.25	2	39.5	1.41	203	2	0.23	11.5	6.16	4.38	1.16	#NULL!	6.3	94
1	2451	2022-03-13 10:58:23	1	1	19.9762	74	2	female	2	1.45	42	No	Married	1	#NULL!	0	Respiratory System	4	0	1	0	1	0	0	0	48.2	1	30.2	#NULL!	1.93	1.21	62.4	93	1	2	3.06	1	27.7	0.28	67	1	0.06	10.1	3.13	2.17	0.39	1	17.8	13
1	2501	2022-03-13 11:24:30	1	0	22.7204	69	1	male	1	1.73	68	No	Married	1	#NULL!	0	Digestive System	0	0	1	1	1	0	0	0	71.9	2	43.7	#NULL!	2.4	4.14	63.6	164	2	1	4.8	2	47.1	1.7	119	2	0.13	10.7	4.49	2.47	0.78	1	15.1	28
1	2454	2022-03-13 12:38:44	2	1	16.2222	82	4	male	1	1.5	36.5	No	Married	1	#NULL!	0	Digestive System	0	0	0	0	1	0	0	0	60	1	30.2	138	9.48	7.04	74.3	170	2	2	5.57	2	50.2	1.8	167	2	0.18	10.8	3.96	0.98	1.03	1	10.6	41
1	2286	2022-03-14 09:42:47	2	1	19.9792	67	1	female	2	1.55	48	No	Married	1	#NULL!	0	Digestive System	0	1	1	0	1	0	0	0	69.4	2	37.7	#NULL!	4.78	3.05	63.8	102	1	1	3.8	1	31.5	1.21	168	2	0.19	11	#NULL!	#NULL!	#NULL!	#NULL!	11.1	16
1	2361	2022-03-14 09:44:13	1	0	21.4031	70	1	female	2	1.45	45	No	Married	1	#NULL!	0	Respiratory System	0	1	1	0	0	0	0	0	68.3	2	42.1	155	8.17	4.63	56.7	148	2	1	4.77	2	42.4	2.92	284	2	0.28	10	6.13	1.6	1.54	#NULL!	10.4	14
1	2392	2022-03-14 10:32:45	2	1	#NULL!	83	4	male	1	1.6	#NULL!	Yes	Married	1	#NULL!	0	Digestive System	0	0	1	0	0	0	0	0	63.3	1	34.5	#NULL!	13.68	12.96	94.7	134	2	2	4.5	2	38.8	0.49	169	2	0.19	11.3	#NULL!	#NULL!	#NULL!	#NULL!	14.8	25
1	2205	2022-03-14 12:13:51	1	1	20.4382	68	1	male	1	1.67	57	No	Other	3	#NULL!	0	Digestive System	0	1	0	0	0	0	0	0	68	1	27	#NULL!	3.1	9.92	79.4	84	1	2	3.1	1	23.5	0.93	484	3	0.45	9.3	2.89	1.98	0.08	1	359.8	43
1	2433	2022-03-14 16:45:45	1	0	26.6667	80	3	female	2	1.5	60	No	Married	1	#NULL!	0	Respiratory System	4	0	1	0	0	0	0	0	70.9	2	39.8	#NULL!	5.36	3.97	74	139	2	2	4.52	2	39.3	1.02	239	2	0.26	11	#NULL!	#NULL!	#NULL!	#NULL!	8.2	18
1	2485	2022-03-15 09:26:29	1	1	15.5709	66	1	male	1	1.7	45	No	Married	1	#NULL!	0	Digestive System	4	0	0	0	0	0	0	0	80.8	2	40.1	214	9.7	5.74	59.1	136	2	1	4.14	2	38.8	2.89	452	3	0.37	8.1	5.75	1.67	1.38	#NULL!	7.2	10
1	2473	2022-03-15 09:40:13	2	0	25.4767	69	1	female	2	1.56	62	No	Married	1	#NULL!	0	Reproductive System	0	1	0	0	0	0	0	0	73.6	2	38.1	#NULL!	4.65	2.54	54.6	137	2	1	4.31	2	40.3	1.38	230	2	0.27	11.6	#NULL!	#NULL!	#NULL!	#NULL!	5.9	14
1	2393	2022-03-15 09:40:13	2	0	21.875	72	2	male	1	1.6	56	No	Married	1	#NULL!	0	Digestive System	0	0	0	1	0	0	0	0	72.5	2	43.7	#NULL!	8.93	6.96	78	146	2	2	5.01	2	45	1.37	302	3	0.27	8.9	#NULL!	#NULL!	#NULL!	#NULL!	17.5	9
1	2285	2022-03-15 10:36:48	1	1	18.8588	74	2	male	1	1.51	43	No	Married	1	#NULL!	0	Respiratory System	4	0	1	0	0	0	0	0	71.3	2	31.4	#NULL!	20.54	15.29	74.4	146	2	2	4.61	2	43.1	4.05	207	2	0.21	9.9	5.66	1.24	1.48	#NULL!	6.2	17
1	2440	2022-03-15 10:37:23	1	0	33.5938	73	2	female	2	1.6	86	No	Widowed	0	#NULL!	0	Digestive System	0	0	1	1	1	0	0	0	57.3	1	31.8	#NULL!	3.41	2.1	61.4	134	2	1	4.52	2	40.6	0.76	140	2	0.14	10.1	2.51	1.41	0.6	1	6.7	22
1	2444	2022-03-15 10:43:52	1	1	19.9594	72	2	male	1	1.66	55	No	Married	1	#NULL!	0	Respiratory System	4	0	0	0	0	0	0	1	47.9	1	26.7	#NULL!	8.88	7.56	85.1	124	2	2	4.27	2	38.1	0.78	274	2	0.25	9.1	3.58	0.93	0.9	1	8.9	19
1	2456	2022-03-15 11:21:13	1	1	17.2248	79	3	male	1	1.58	43	No	Married	1	#NULL!	0	Digestive System	4	0	0	0	0	0	0	0	69.9	2	36.1	#NULL!	5.5	4.18	76.2	118	1	2	3.73	1	33.3	0.9	237	2	0.22	9.1	#NULL!	#NULL!	#NULL!	#NULL!	139.6	361
1	2386	2022-03-15 17:34:14	2	0	21.2953	71	2	male	1	1.72	63	No	Married	1	#NULL!	0	Respiratory System	4	0	0	0	0	0	0	0	71	2	39	#NULL!	6.65	4.41	66.4	207	2	1	5.61	2	62.5	1.7	157	2	0.17	10.7	3.23	0.93	0.78	1	50.4	9
1	2565	2022-03-16 09:02:58	1	0	23.2434	74	2	male	1	1.62	61	No	Widowed	1	#NULL!	0	Respiratory System	0	0	0	0	0	0	0	0	58.7	1	31.7	#NULL!	3.6	3.52	66.4	131	2	1	1.8	1	37.9	1.16	297	2	0.26	8.6	4.28	0.65	1.29	0	4.4	17
1	2562	2022-03-16 09:09:41	1	1	20.1956	67	1	female	2	1.68	57	No	Widowed	0	#NULL!	0	Reproductive System	0	0	0	0	0	0	0	0	57.9	1	37.9	204	1.4	4.65	74.7	134	2	2	0	2	40.3	1.12	223	2	0.19	8.5	5.51	2.71	1.02	#NULL!	6	25
1	2515	2022-03-16 10:45:22	1	0	20.8307	73	2	male	1	1.78	66	No	Married	1	#NULL!	0	Respiratory System	0	1	0	0	0	0	0	0	62.3	1	37.6	#NULL!	5.8	3.02	52	151	2	1	4.82	2	42.2	2.12	297	2	0.25	8.4	#NULL!	#NULL!	#NULL!	#NULL!	4.3	27
1	2421	2022-03-17 09:12:26	1	1	16.563	84	4	male	1	1.72	49	No	Married	1	#NULL!	0	Other	0	0	1	1	0	0	0	0	71.3	2	33.7	#NULL!	4.57	2.91	63.8	108	1	1	3.45	1	32	1.19	174	2	0.14	8.1	3.2	0.73	1.01	1	5	38
1	2415	2022-03-17 09:12:57	2	0	21.3333	84	4	female	2	1.5	48	No	Widowed	1	#NULL!	0	Respiratory System	0	0	1	0	1	0	0	0	63.5	1	34.9	#NULL!	11.02	8.05	72.9	134	2	2	4.11	2	37.7	1.97	291	2	0.29	10.1	6.24	1.45	1.05	#NULL!	7.5	12
1	2568	2022-03-17 09:44:19	1	0	35.756	66	1	female	2	1.63	95	No	Widowed	0	#NULL!	0	Respiratory System	0	1	0	0	0	0	0	0	72.4	2	43.8	#NULL!	8.22	5	61	153	2	1	5.17	2	45.3	2.51	380	3	0.33	8.7	8.17	3.07	1.14	#NULL!	4.5	19
1	2387	2022-03-17 10:07:12	1	0	26.4463	68	1	male	1	1.65	72	No	Married	1	#NULL!	0	Reproductive System	4	0	1	0	0	0	0	0	62.5	1	36.9	#NULL!	5.1	2.77	66.5	108	1	1	6.3	2	30.7	1	285	2	0.22	7.8	#NULL!	#NULL!	#NULL!	#NULL!	9.9	14
1	2466	2022-03-17 10:20:50	1	0	20.5693	85	4	male	1	1.65	56	No	Married	1	#NULL!	0	Reproductive System	4	0	0	0	0	1	0	0	65.8	1	35.5	#NULL!	20.3	3.39	61.2	137	2	1	175.8	2	40.2	1.78	272	2	0.27	10	#NULL!	#NULL!	#NULL!	#NULL!	15.4	14
1	2384	2022-03-17 15:02:52	1	0	23.03	72	2	male	1	1.68	65	No	Married	1	#NULL!	0	Respiratory System	0	0	0	0	0	0	0	0	64.6	1	34.1	#NULL!	5.95	3.7	62.3	134	2	1	4.09	2	38.7	1.47	204	2	0.21	10.2	4.39	0.8	1.2	0	6.4	12
1	2567	2022-03-17 16:21:28	1	0	29.4118	74	2	male	1	1.7	85	No	Married	1	#NULL!	0	Respiratory System	4	0	1	0	0	0	0	0	73	2	40.1	#NULL!	9.84	7	71	158	2	2	4.55	2	44.6	2.09	277	2	0.26	9.3	#NULL!	#NULL!	#NULL!	#NULL!	5.4	11
1	2506	2022-03-18 09:37:38	1	0	21.6311	76	3	female	2	1.58	54	No	Other	3	#NULL!	0	Digestive system	0	1	1	0	1	0	0	0	65.1	1	36.1	#NULL!	4.25	2.15	50.7	111	1	1	4.68	2	34.3	1.58	182	2	0.19	10.4	4.01	1.24	1.15	1	11	14
1	2438	2022-03-18 15:10:42	1	1	18.0662	79	3	male	1	1.63	48	No	Married	1	#NULL!	0	Respiratory System	4	0	0	0	0	0	0	1	60.1	1	29.8	#NULL!	5.64	4.04	71.6	139	2	2	4.29	2	40.8	0.97	151	2	0.15	9.9	#NULL!	#NULL!	#NULL!	#NULL!	21.2	34
1	2462	2022-03-18 15:47:26	2	0	28.5156	66	1	female	2	1.6	73	No	Married	1	#NULL!	0	Respiratory System	0	0	1	0	1	0	0	0	69.5	2	39.4	#NULL!	4.94	2.3	46.4	137	2	1	4.25	2	38.7	2.16	221	2	0.21	9.4	6.47	1.02	1.39	#NULL!	5.4	15
1	2536	2022-03-19 08:40:15	1	0	24.0055	74	2	male	1	1.62	63	No	Married	1	#NULL!	0	Blood System	4	0	0	0	0	0	0	0	73.6	2	35.6	#NULL!	4.84	3.72	76.7	127	2	2	3.86	1	37.1	0.81	141	2	0.14	9.9	#NULL!	#NULL!	#NULL!	#NULL!	11.5	22
1	2520	2022-03-19 09:25:13	1	0	24.6097	70	1	male	1	1.65	67	No	Married	1	#NULL!	0	Digestive System	0	0	0	0	0	0	0	1	56.4	1	20.4	#NULL!	2.79	2	71.9	81	1	2	2.86	1	23.9	0.34	109	2	0.11	10.7	#NULL!	#NULL!	#NULL!	#NULL!	47	27
1	2413	2022-03-19 10:01:08	1	0	26.6389	70	1	male	1	1.55	64	No	Married	1	#NULL!	0	Digestive System	0	1	0	0	0	0	0	0	69.6	2	44	#NULL!	3.34	1.89	56.7	149	2	1	4.63	2	41.9	1.08	166	2	0.15	9.2	#NULL!	#NULL!	#NULL!	#NULL!	25	23
1	2539	2022-03-19 10:05:35	1	0	21.9289	72	2	female	2	1.51	50	No	Married	1	#NULL!	0	Digestive System	4	0	1	0	0	0	0	0	67.7	1	39.1	#NULL!	6.94	3.94	56.9	133	2	1	3.74	1	38.3	2.06	198	2	0.19	9.8	#NULL!	#NULL!	#NULL!	#NULL!	10.8	11
1	2552	2022-03-20 10:06:31	2	0	23.6244	68	1	male	1	1.62	62	No	Married	1	#NULL!	0	Respiratory System	0	1	0	0	0	0	0	0	80	2	36.8	264	6.81	4.61	67.5	123	2	1	4.07	2	36.8	1.47	407	3	0.34	8.3	#NULL!	#NULL!	#NULL!	#NULL!	4	20
1	2545	2022-03-21 09:26:51	1	0	22.3094	69	1	male	1	1.72	66	No	Married	1	#NULL!	0	Reproductive System	0	0	0	0	0	0	0	0	73.5	2	42.3	#NULL!	5.87	3.84	65.3	160	2	1	4.89	2	45.5	1.49	177	2	0.21	12.1	#NULL!	#NULL!	#NULL!	#NULL!	8.9	21
1	2550	2022-03-21 10:04:26	1	1	19.8839	70	1	male	1	1.78	63	No	Married	1	#NULL!	0	Reproductive System	4	0	1	1	0	0	0	0	74.3	2	38	#NULL!	9.03	6.85	75.8	137	2	2	4.46	2	40.1	1.56	314	3	0.25	8.1	5.44	1.34	1.18	#NULL!	12.1	9
1	2523	2022-03-21 10:24:36	2	0	28	75	2	female	2	1.5	63	No	Married	1	#NULL!	0	Respiratory system	0	0	0	0	0	0	0	0	71.1	2	40.4	#NULL!	5.19	2.36	45.6	128	2	1	3.97	1	37.6	2.28	137	2	0.19	13.6	#NULL!	#NULL!	#NULL!	#NULL!	4	18
1	2557	2022-03-21 10:34:47	1	1	19.563	66	1	female	2	1.55	47	No	Married	1	#NULL!	0	Digestive System	0	1	0	0	0	0	0	0	61.9	1	33.4	#NULL!	4.46	2.8	62.9	101	1	1	3.55	1	30.6	1.26	262	2	0.27	10.5	#NULL!	#NULL!	#NULL!	#NULL!	4.2	16
1	2560	2022-03-21 10:46:56	1	1	16	73	2	female	2	1.5	36	No	Married	1	#NULL!	0	Endocrine System	4	0	0	0	0	0	0	0	59.6	1	32	#NULL!	7.96	7.31	91.8	85	1	2	2.92	1	26.4	0.39	294	2	0.29	9.8	#NULL!	#NULL!	#NULL!	#NULL!	7.4	7
1	2530	2022-03-22 08:56:12	2	0	21.9671	74	2	male	1	1.68	62	No	Married	1	#NULL!	0	Hematologic System	4	0	0	0	0	0	0	0	57.7	1	34.1	#NULL!	3.21	1.63	50.7	121	2	1	4.07	2	36	0.9	171	2	0.18	10.2	#NULL!	#NULL!	#NULL!	#NULL!	6.3	19
1	2326	2022-03-22 09:40:35	2	0	29.3413	76	3	female	2	1.43	60	No	Married	1	#NULL!	0	Respiratory System	4	0	0	0	0	1	0	0	48.9	1	30.5	#NULL!	23.7	5.46	90.5	125	2	2	4.4	2	35.7	0.3	39	1	0.04	10.3	4.76	1.51	1.39	0	8.9	27
1	2544	2022-03-22 10:08:07	1	1	19.487	72	2	male	1	1.68	55	No	Married	1	#NULL!	0	Digestive System	0	0	0	0	0	0	0	0	72.9	2	44.4	#NULL!	4.11	2.97	72.3	140	2	2	4.3	2	39.5	0.87	128	2	0.15	11.9	4.59	1.45	1	1	6.1	13
1	2551	2022-03-23 08:56:55	1	1	13.2231	82	4	male	1	1.65	36	No	Married	1	#NULL!	1	Digestive System	0	0	0	0	1	1	0	0	52.4	1	25.5	#NULL!	8.68	6.24	71.9	149	2	2	4.8	2	42.5	1.71	138	2	0.12	9	#NULL!	#NULL!	#NULL!	#NULL!	14.2	69
1	2566	2022-03-23 10:10:03	2	0	23.4375	69	1	male	1	1.6	60	No	Married	1	#NULL!	0	Digestive System	0	0	0	0	0	0	0	0	70.7	2	43.3	#NULL!	5.26	3.63	69.3	163	2	2	4.86	2	46	1.12	158	2	0.18	11.3	#NULL!	#NULL!	#NULL!	#NULL!	14.8	66
1	2585	2022-03-24 08:53:00	1	1	19.0039	78	3	male	1	1.67	53	No	Married	1	#NULL!	0	Reproductive System	0	0	0	0	0	1	0	0	53.6	1	27.1	#NULL!	8.67	6.83	78.9	132	2	2	4.75	2	39.5	1.13	295	2	0.3	10.3	#NULL!	#NULL!	#NULL!	#NULL!	2.5	12
1	2534	2022-03-24 09:26:40	2	0	21.875	71	2	male	1	1.6	56	No	Married	1	#NULL!	0	Respiratory System	4	0	0	0	0	0	0	1	61.3	1	31.8	#NULL!	9.67	8.84	91.5	134	2	2	3.91	1	37.7	0.28	134	2	0.15	11.3	#NULL!	#NULL!	#NULL!	#NULL!	112.9	80
1	2299	2022-03-24 09:44:22	2	0	26.8923	67	1	male	1	1.67	75	No	Married	1	#NULL!	0	Respiratory System	0	1	0	0	1	0	0	0	59.3	1	40.9	#NULL!	5.99	3.22	53.8	149	2	1	4.49	2	41.3	2.17	228	2	0.19	8.5	3.67	1.22	0.86	1	4.5	14
1	2578	2022-03-24 09:57:23	1	1	15.625	87	5	male	1	1.6	40	No	Remarried	1	#NULL!	0	Digestive System	0	0	0	0	0	0	0	0	59.9	1	33.1	#NULL!	4.18	2.7	64.8	112	1	1	4.24	2	34.7	0.86	355	3	0.3	8.4	#NULL!	#NULL!	#NULL!	#NULL!	13.2	10
1	2579	2022-03-24 10:17:28	2	0	25.8876	81	4	female	2	1.56	63	No	Married	1	#NULL!	0	Digestive System	0	1	1	1	0	0	0	0	65.3	1	39.4	#NULL!	5.08	2.97	58.5	159	2	1	4.61	2	45.2	1.68	152	2	0.16	10.3	4.33	1.47	1.15	1	8	33
1	2576	2022-03-24 11:14:30	1	0	28.8044	69	1	female	2	1.57	71	No	Other	3	#NULL!	0	Respiratory System	0	0	1	0	1	0	0	0	76.6	2	41.3	#NULL!	6.8	3.85	56.7	151	2	1	4.74	2	43.4	2.51	164	2	0.2	12	4.09	1.31	1.23	0	12.9	24
1	2638	2022-03-24 15:48:05	1	1	18.8189	76	3	male	1	1.63	50	No	Married	1	#NULL!	0	Respiratory System	4	0	0	0	0	0	0	1	62.8	1	29.9	#NULL!	3.07	2.16	70.1	136	2	2	4.2	2	40.2	0.6	154	2	0.13	8.6	#NULL!	#NULL!	#NULL!	#NULL!	10.4	24
1	2553	2022-03-25 08:58:19	2	1	18.0662	77	3	female	2	1.63	48	No	Widowed	0	#NULL!	0	Urinary System	4	0	1	0	0	0	0	0	57.8	1	27.5	#NULL!	8.41	5.25	62.3	104	1	1	3.58	1	29.6	1.92	187	2	0.18	9.4	#NULL!	#NULL!	#NULL!	#NULL!	7.2	9
1	2561	2022-03-25 08:58:45	1	0	22.0386	82	4	male	1	1.65	60	No	Married	1	#NULL!	0	Urinary System	0	0	1	0	0	0	0	0	73.4	2	47.4	#NULL!	5.86	3.95	67.5	179	2	1	5.3	2	50.5	1.29	205	2	0.22	10.8	#NULL!	#NULL!	#NULL!	#NULL!	19.5	15
1	2507	2022-03-25 09:27:25	2	1	19.5312	68	1	male	1	1.6	50	No	Other	3	#NULL!	0	Digestive System	0	0	0	0	0	0	0	0	58.4	1	34.7	#NULL!	5.67	3.47	61.2	114	1	1	3.25	1	33.6	1.35	210	2	0.2	9.6	#NULL!	#NULL!	#NULL!	#NULL!	21.9	9
1	2626	2022-03-25 11:47:04	2	0	21.3382	72	2	male	1	1.62	56	No	Married	1	#NULL!	0	Respiratory System	4	1	0	0	0	0	0	0	69.8	2	36.5	#NULL!	10.79	7.11	65.9	144	2	1	4.62	2	42.5	2.81	219	2	0.2	9.1	6.78	0.95	1.8	#NULL!	3.3	14
1	2569	2022-03-25 16:58:00	2	0	24.0346	68	1	female	2	1.58	60	No	Married	1	#NULL!	0	Respiratory System	4	0	0	0	0	0	0	1	70.1	2	39	#NULL!	7.78	5.64	72.4	162	2	2	5.22	2	46.5	1.68	312	3	0.34	10.7	6.55	1.64	1.39	#NULL!	11.8	21
1	2650	2022-03-26 09:02:11	1	0	21.875	83	4	male	1	1.6	56	No	Married	1	#NULL!	0	Reproductive System	0	0	0	0	0	1	0	0	66.2	1	37.6	#NULL!	206.6	3.94	65	158	2	1	17890.1	2	43.9	1.64	181	2	0.18	9.6	#NULL!	#NULL!	#NULL!	#NULL!	23.1	25
1	2602	2022-03-26 09:44:20	2	1	16.901	72	2	male	1	1.72	50	No	Married	1	#NULL!	0	Digestive System	4	0	0	0	0	0	0	0	63	1	38.8	#NULL!	3.9	3.55	74.8	141	2	2	0	2	40.9	0.77	108	2	0.14	12.5	#NULL!	#NULL!	#NULL!	#NULL!	17.8	19
1	2613	2022-03-26 12:32:34	1	0	24.4646	75	2	male	1	1.63	65	No	Married	1	#NULL!	0	Exercise System	0	0	0	0	0	0	0	0	68.4	2	34	#NULL!	10.65	7.58	71.2	148	2	2	4.75	2	44.3	2.01	215	2	0.24	11.2	3.27	1.25	0.87	1	23.7	32
1	2547	2022-03-27 08:50:18	1	1	19.4674	70	1	male	1	1.65	53	No	Married	1	#NULL!	0	Urinary System	4	0	0	0	0	0	0	0	59.7	1	16.8	#NULL!	3.05	1.48	48.5	73	1	1	2.5	1	21.6	1.32	69	1	0.06	9.3	#NULL!	#NULL!	#NULL!	#NULL!	7.8	11
1	2615	2022-03-27 09:01:15	2	1	15.625	72	2	female	2	1.6	40	No	Married	1	#NULL!	0	Digestive System	4	0	1	0	0	0	0	0	74.9	2	35.4	#NULL!	6.1	4.41	72.2	102	1	2	3.77	1	31.9	1	546	3	0.47	8.5	#NULL!	#NULL!	#NULL!	#NULL!	14.4	36
1	2513	2022-03-27 09:14:37	2	0	24.3496	71	2	male	1	1.53	57	No	Married	1	#NULL!	0	Reproductive System	0	0	0	0	0	0	0	0	59.2	1	35	#NULL!	6.2	5.07	81.8	129	2	2	3.89	1	36.3	0.75	175	2	0.17	9.5	#NULL!	#NULL!	#NULL!	#NULL!	8.3	15
1	2647	2022-03-27 09:21:53	1	0	24.2382	72	2	male	1	1.52	56	No	Married	1	#NULL!	0	Digestive System	4	0	1	0	0	0	0	0	70.8	2	39.8	#NULL!	9.7	7.3	75.2	171	2	2	5.41	2	49.3	1.29	160	2	0.19	12	#NULL!	#NULL!	#NULL!	#NULL!	23.7	19
1	2577	2022-03-27 10:02:43	1	1	15.8169	76	3	female	2	1.55	38	No	Married	1	#NULL!	0	Respiratory System	4	0	0	0	0	0	0	0	67.6	1	38.2	#NULL!	9.26	7.47	80.8	111	1	2	3.51	1	32.6	1.04	253	2	0.21	8.5	4.91	1.1	1.36	0	25.6	12
1	2591	2022-03-27 10:50:28	2	0	28	76	3	female	2	1.5	63	No	Married	1	#NULL!	0	Reproductive System	0	0	1	0	1	0	0	0	76	2	42	#NULL!	7.01	5.07	72.2	174	2	2	5.25	2	50.4	1.5	193	2	0.23	11.8	4.64	1.39	1.03	1	10.2	15
1	2621	2022-03-28 09:59:15	1	0	22.5896	67	1	male	1	1.67	63	No	Married	1	#NULL!	0	Digestive System	0	1	0	0	0	0	0	0	60.6	1	37.7	#NULL!	5.24	3.68	70	144	2	2	4.86	2	42.5	1.08	132	2	0.14	10.3	3.56	1.35	0.95	1	11.4	71
1	2459	2022-03-28 15:42:09	2	1	19.5312	76	3	male	1	1.6	50	No	Married	1	#NULL!	0	Reproductive System	0	0	0	0	0	0	0	0	70.1	2	38.5	#NULL!	8.85	5.87	66.3	145	2	1	5.36	2	42.3	2.49	242	2	0.25	10.2	#NULL!	#NULL!	#NULL!	#NULL!	11.7	20
1	2751	2022-03-29 10:26:28	2	0	22.4913	66	1	male	1	1.7	65	No	Married	1	#NULL!	0	Respiratory System	4	0	0	0	0	0	0	0	69	2	42.4	#NULL!	3.76	2.38	63.3	144	2	1	4.59	2	42.8	1.08	140	2	0.14	9.7	6.6	0.89	1.55	#NULL!	8.1	13
1	2573	2022-03-30 08:18:59	2	0	22.3703	78	3	female	2	1.48	49	No	Widowed	0	#NULL!	0	Respiratory System	0	0	1	0	1	0	0	0	70.9	2	38.5	#NULL!	5.3	4.02	75.9	134	2	2	4.1	2	40	0.85	289	2	0.27	9.3	5.36	0.69	1.91	#NULL!	9.8	12
1	2604	2022-03-30 08:27:55	2	1	15.9788	77	3	female	2	1.48	35	No	Married	1	#NULL!	0	Other	4	0	0	0	1	0	0	0	64.7	1	35.7	#NULL!	4.5	3.5	77.7	104	1	2	3.31	1	30.2	0.52	116	2	0.11	9.2	4.55	1.4	1.13	1	8.9	7
1	2639	2022-03-30 09:55:21	2	1	19.1467	75	2	female	2	1.55	46	No	Married	1	#NULL!	0	Endocrine System	0	0	1	1	1	0	0	0	71.9	2	42	#NULL!	5.1	2.59	50.7	148	2	1	4.73	2	43	1.86	197	2	0.19	9.6	5.06	1.42	1.09	1	10.7	14
1	2541	2022-03-30 09:55:32	2	1	#NULL!	77	3	male	1	1.65	#NULL!	Yes	Married	1	#NULL!	0	Motor System	4	0	1	0	0	0	0	0	58	1	27.9	#NULL!	10.4	9.83	94.6	179	2	2	4.93	2	49.6	0.23	57	1	0.06	10	3.44	3.82	0.65	1	18.3	28
1	2563	2022-03-31 08:43:19	1	1	20.3125	76	3	male	1	1.6	52	No	Married	1	#NULL!	0	Digestive System	4	0	0	0	0	0	0	0	72.3	2	34.8	#NULL!	4.14	1.5	36.2	147	2	1	4.2	2	41.3	2.08	109	2	0.12	12.4	#NULL!	#NULL!	#NULL!	#NULL!	17	43
1	2663	2022-03-31 08:52:12	1	1	15.5709	66	1	male	1	1.7	45	No	Married	1	#NULL!	0	Digestive System	4	0	0	0	0	0	0	0	80.7	2	39.1	181	11.42	7.51	65.8	126	2	1	4.07	2	37.6	2.77	486	3	0.38	7.9	5.38	1.43	1.33	#NULL!	6.2	9
1	2616	2022-03-31 09:13:05	2	0	23.3091	65	1	female	2	1.55	56	No	Other	3	#NULL!	1	Digestive System	0	0	0	0	0	0	0	0	55	1	28.5	#NULL!	15.14	12.44	82.2	79	1	2	2.5	1	24.6	1.33	266	2	0.22	8.2	#NULL!	#NULL!	#NULL!	#NULL!	39.2	15
1	2643	2022-04-01 10:11:30	1	1	20.9042	84	4	male	1	1.68	59	No	Married	1	#NULL!	0	Respiratory System	4	0	1	0	1	0	0	1	51.1	1	20.7	#NULL!	5.32	3.25	61.1	131	2	2	4.46	2	38.4	0.86	264	2	0.3	11.5	3.61	0.83	1.22	0	8.2	13
1	2528	2022-04-02 09:55:45	1	1	20.6575	73	2	male	1	1.69	59	No	Married	1	#NULL!	0	Digestive System	4	0	0	0	0	0	0	0	68.8	2	41.1	114	7.31	4.46	61.1	156	2	1	4.86	2	43.2	2.07	283	2	0.24	8.5	#NULL!	#NULL!	#NULL!	#NULL!	11.6	25
1	2478	2022-04-02 10:37:48	1	0	22.1453	93	5	male	1	1.7	64	No	Married	1	#NULL!	0	Digestive System	0	1	1	0	0	1	0	0	70.7	2	36.2	97	5.82	3.11	53.4	127	2	1	4.02	2	36.2	2.36	153	2	0.16	10.6	2.05	0.46	1.07	1	10.5	54
1	2653	2022-04-02 16:20:01	1	0	23.1837	69	1	male	1	1.75	71	No	Married	1	#NULL!	0	Digestive System	4	0	0	0	0	0	0	0	60.1	1	28.1	#NULL!	4.52	3.4	75.3	136	2	2	4.38	2	39.7	0.73	113	2	0.11	9.7	#NULL!	#NULL!	#NULL!	#NULL!	18.9	63
1	2589	2022-04-03 08:41:00	1	1	19.433	83	4	male	1	1.62	51	No	Married	1	#NULL!	0	Digestive System	4	0	1	0	0	0	0	0	51.9	1	27.8	203	3.89	3.23	83	106	1	2	3.24	1	32	0.36	112	2	0.11	10.2	7.15	0.79	1.15	#NULL!	20.8	48
1	2632	2022-04-03 08:45:58	2	1	19.052	72	2	female	2	1.62	50	No	Other	3	#NULL!	0	Digestive System	0	0	0	1	0	0	0	0	76.2	2	38.2	#NULL!	5.76	3.98	69.1	104	1	1	3.17	1	30.5	1.24	255	2	0.25	10	#NULL!	#NULL!	#NULL!	#NULL!	127.9	97
1	2597	2022-04-03 08:52:00	1	0	22.6003	76	3	female	2	1.56	55	No	Widowed	0	#NULL!	0	Digestive System	4	0	0	0	0	0	0	0	62.2	1	27.1	#NULL!	9.31	6.7	72	124	2	2	4.38	2	36	1.74	357	3	0.34	9.5	#NULL!	#NULL!	#NULL!	#NULL!	8.9	22
1	2789	2022-04-03 09:17:23	2	1	19.5006	74	2	female	2	1.45	41	No	Married	1	#NULL!	0	Reproductive System	4	0	0	0	0	0	0	0	68.6	2	37.4	194	3.87	2.37	61.2	132	2	1	4.54	2	39.7	1.09	245	2	0.24	9.9	4.77	1.12	1.17	0	7.8	29
1	2773	2022-04-03 09:44:53	1	0	24.1965	71	2	female	2	1.48	53	No	Married	1	#NULL!	0	Reproductive system	4	0	1	0	0	0	0	0	63.6	1	37.7	#NULL!	4.14	2.89	69.5	110	1	2	3.58	1	33.8	0.79	187	2	0.17	9.3	#NULL!	#NULL!	#NULL!	#NULL!	6.3	11
1	2642	2022-04-03 11:02:21	1	1	19.3821	65	1	male	1	1.59	49	No	Married	1	#NULL!	0	Respiratory system	4	0	0	0	0	0	0	0	63.3	1	39.2	#NULL!	4.59	3.18	69.2	122	2	2	3.74	1	34.9	0.84	266	2	0.21	7.8	5.04	0.57	1.64	0	7.7	19
1	2708	2022-04-04 09:26:22	1	1	19.9792	66	1	female	2	1.55	48	No	Widowed	0	#NULL!	0	Digestive System	0	1	0	0	0	0	0	0	69.2	2	37.5	#NULL!	4.77	3.48	73.2	110	1	2	3.83	1	33.2	0.98	189	2	0.21	11.2	#NULL!	#NULL!	#NULL!	#NULL!	4.9	22
1	2741	2022-04-04 10:21:31	1	1	20.202	66	1	male	1	1.65	55	No	Married	1	#NULL!	0	Digestive System	4	1	0	0	0	0	0	0	65.9	1	38.6	#NULL!	4.2	2.74	65.4	138	2	2	4.4	2	40.4	0.82	123	2	0.14	11.7	3.66	1.17	0.83	1	11.7	11
1	2762	2022-04-04 11:15:46	1	0	27.3797	78	3	male	1	1.72	81	No	Married	1	#NULL!	0	Respiratory System	4	0	1	0	0	0	0	0	66.4	1	32.8	#NULL!	8.42	6.69	79.4	136	2	2	4.52	2	40.3	0.71	241	2	0.21	8.7	#NULL!	#NULL!	#NULL!	#NULL!	16.3	27
1	2656	2022-04-05 08:36:56	1	1	20.0796	69	1	male	1	1.67	56	No	Married	1	#NULL!	0	Digestive System	4	0	0	0	1	0	0	0	61.8	1	38.7	184	4.48	2.57	57.3	138	2	1	4.07	2	40.2	1.4	117	2	0.1	8.8	3.64	0.65	1.38	0	8.9	27
1	2761	2022-04-05 10:23:35	1	1	18.6122	74	2	male	1	1.75	57	No	Married	1	#NULL!	0	Digestive System	0	1	0	0	0	0	0	0	63.5	1	38.3	#NULL!	6.41	4.99	77.8	121	2	2	3.59	1	35.1	0.97	138	2	0.12	8.5	#NULL!	#NULL!	#NULL!	#NULL!	50.5	11
1	2788	2022-04-06 09:04:53	2	1	17.313	77	3	female	2	1.52	40	No	Married	1	#NULL!	0	Urinary System	0	0	0	0	0	0	0	0	68.9	2	41	#NULL!	6.84	4.77	69.8	101	1	2	3.25	1	30.5	1.47	174	2	0.19	10.8	5.65	1.34	1.6	#NULL!	8.8	11
1	2607	2022-04-06 09:40:11	2	0	26.7094	69	1	female	2	1.56	65	No	Married	1	#NULL!	0	Reproductive System	0	1	0	0	0	0	0	0	72.2	2	38.8	#NULL!	3.83	1.85	48.3	131	2	1	4.1	2	38.6	1.32	208	2	0.24	11.6	#NULL!	#NULL!	#NULL!	#NULL!	4.9	13
1	2661	2022-04-06 11:21:48	1	0	23.9224	72	2	male	1	1.53	56	No	Married	1	#NULL!	0	Digestive System	4	0	1	0	0	0	0	0	71.2	2	41.1	#NULL!	8.08	5.88	72.7	169	2	2	5.47	2	49.8	1.37	205	2	0.22	10.9	#NULL!	#NULL!	#NULL!	#NULL!	15.3	19
1	2766	2022-04-06 13:01:30	1	0	21.2245	66	1	male	1	1.75	65	No	Married	1	#NULL!	0	Respiratory System	0	0	0	0	0	0	0	0	70.4	2	46.1	#NULL!	4.33	2.7	62.6	171	2	1	5.31	2	50.3	1.23	158	2	0.17	10.9	5.84	1.62	1.34	#NULL!	13.9	20
1	2532	2022-04-06 15:13:13	1	0	21.7778	69	1	female	2	1.5	49	No	Married	1	#NULL!	0	Respiratory System	0	0	1	0	0	0	0	0	80.7	2	46.8	#NULL!	8.02	4.05	50.5	148	2	1	4.74	2	44.7	3.39	250	2	0.28	11.2	5.31	1.87	1.77	#NULL!	8.5	17
1	2698	2022-04-07 09:15:55	2	1	17.0656	80	3	male	1	1.55	41	No	Unmarried	#NULL!	#NULL!	0	Respiratory System	4	0	0	0	0	0	0	0	49.7	1	22.6	#NULL!	10.7	2.26	69.5	83	1	1	1.1	1	25.2	0.8	46	1	0.04	9.3	#NULL!	#NULL!	#NULL!	#NULL!	9.7	24
1	2784	2022-04-07 09:57:26	1	1	20.3125	71	2	male	1	1.6	52	No	Other	3	#NULL!	0	Digestive System	4	0	0	0	0	0	0	0	70.1	2	38.1	#NULL!	3.7	1.88	48	103	1	1	2.5	1	32.3	0.96	72	1	0.06	9.4	3.21	0.64	1.08	1	17.3	24
1	2631	2022-04-07 10:20:38	1	0	29.3413	76	3	female	2	1.43	60	No	Married	1	#NULL!	0	Respiratory System	4	0	1	0	0	1	0	0	64.4	1	41.7	#NULL!	7.63	6.76	88.8	66	1	2	2.18	1	19.5	0.26	210	2	0.22	10.2	#NULL!	#NULL!	#NULL!	#NULL!	17.4	30
1	2510	2022-04-07 11:47:06	1	0	24.4473	66	1	male	1	1.68	69	No	Married	1	#NULL!	0	Urinary System	0	0	0	0	0	1	0	0	79.6	2	47.5	#NULL!	6.81	4.1	60.2	179	2	1	5.47	2	50.1	2.26	212	2	0.24	11.4	#NULL!	#NULL!	#NULL!	#NULL!	17.6	41
1	2749	2022-04-07 14:12:47	1	1	16.0156	70	1	male	1	1.6	41	No	Married	1	#NULL!	0	Respiratory System	4	0	0	0	0	0	0	0	64.1	1	32.2	#NULL!	11.84	8.83	74.6	128	2	2	4.02	2	38.7	1.65	329	3	0.33	10.1	4.22	0.91	1.5	0	16.9	6
1	2614	2022-04-07 14:43:37	2	1	20.1951	81	4	female	2	1.62	53	No	Married	1	#NULL!	0	Respiratory System	4	0	1	1	0	0	0	1	57.2	1	29.1	#NULL!	10.25	7.54	73.6	137	2	2	4.44	2	40.4	1.6	207	2	0.18	8.7	4.23	1.03	0.93	1	7.3	15
1	2709	2022-04-07 15:13:56	1	0	21.8787	65	1	female	2	1.45	46	No	Married	1	#NULL!	0	Respiratory System	4	0	0	0	0	0	0	1	65	1	38.1	#NULL!	5.94	4.8	80.7	134	2	2	4.68	2	40	0.63	316	3	0.32	10.1	5.14	0.88	1.09	1	8.9	12
1	2717	2022-04-08 08:26:30	2	0	21.416	80	3	female	2	1.26	34	No	Other	3	#NULL!	1	Digestive System	4	0	1	0	0	0	0	0	60.9	1	31.7	#NULL!	7.1	5.66	79.8	130	2	2	4.46	2	35	0.84	286	2	0.27	9.6	#NULL!	#NULL!	#NULL!	#NULL!	557.1	169
1	2703	2022-04-08 08:47:14	2	0	560	78	3	female	2	0.5	140	No	Married	1	#NULL!	0	Digestive System	0	1	0	0	0	0	0	0	60.8	1	37.4	#NULL!	5.39	4.1	76.1	134	2	2	4.08	2	37.7	0.77	183	2	0.18	10	4.37	1.56	0.79	1	7.4	26
1	2571	2022-04-08 14:54:33	1	0	23.0469	74	2	male	1	1.6	59	No	Married	1	#NULL!	0	Digestive System	0	0	0	0	0	0	0	0	67.8	1	39	#NULL!	6.26	4.04	64.5	152	2	1	4.55	2	42.3	1.79	243	2	0.28	11.6	4.52	0.62	1.2	0	6.4	17
1	2711	2022-04-09 09:37:50	1	1	18.6851	84	4	male	1	1.7	54	No	Married	1	#NULL!	0	Respiratory System	0	0	0	0	0	0	0	1	41.3	1	42.6	#NULL!	0	2.28	63.5	165	2	1	1.2	1	45	0.9	201	2	0.18	8.9	6	3	1.13	#NULL!	18.2	26
1	2780	2022-04-10 08:22:14	2	0	22.4323	82	4	female	2	1.58	56	No	Widowed	0	#NULL!	0	Digestive System	0	1	1	1	1	1	0	0	77.9	2	36.6	#NULL!	6.73	4.11	61.1	121	2	1	4.63	2	37.2	1.87	285	2	0.28	9.9	#NULL!	#NULL!	#NULL!	#NULL!	6.6	16
1	2676	2022-04-10 09:08:50	2	1	20.202	69	1	female	2	1.65	55	No	Married	1	#NULL!	0	Reproductive System	4	1	0	0	0	0	0	0	77.7	2	46.7	#NULL!	5.15	2.46	47.7	151	2	1	4.67	2	44.6	2.38	216	2	0.18	8.5	#NULL!	#NULL!	#NULL!	#NULL!	5	19
1	2782	2022-04-10 09:31:45	1	0	25.9766	68	1	male	1	1.6	66.5	No	Married	1	#NULL!	0	Respiratory System	0	0	0	0	0	0	0	0	75.5	2	44.8	#NULL!	5.19	2.85	54.9	164	2	1	4.9	2	48.9	2.01	206	2	0.2	9.5	6.86	0.97	1.9	#NULL!	20.5	18
1	2713	2022-04-10 10:49:19	1	1	20.0777	73	2	female	2	1.53	47	No	Other	3	#NULL!	0	Digestive System	0	1	1	0	0	0	0	0	67.4	1	39.6	#NULL!	6.39	3.5	54.7	131	2	1	3.76	1	36.9	1.91	161	2	0.15	9.5	#NULL!	#NULL!	#NULL!	#NULL!	23.2	14
1	2666	2022-04-11 08:51:53	1	0	24.653	73	2	female	2	1.48	54	No	Married	1	#NULL!	0	Digestive System	4	0	1	0	0	0	0	0	76	2	40.1	#NULL!	10.12	7.82	77.3	160	2	2	5.43	2	48.6	1.38	275	2	0.29	10.5	#NULL!	#NULL!	#NULL!	#NULL!	15.4	22
1	2715	2022-04-11 09:15:22	1	0	25.3906	84	4	female	2	1.6	65	No	Widowed	0	#NULL!	0	Reproductive system	0	0	1	1	0	1	0	0	70.5	2	38.7	#NULL!	5.8	3.06	52.8	145	2	1	4.69	2	41	2.22	294	2	0.3	10.1	4.94	3.55	1.08	1	12.9	11
1	2655	2022-04-11 12:03:11	1	0	22.4766	71	2	female	2	1.55	54	No	Widowed	0	#NULL!	0	Digestive System	0	0	1	0	0	0	0	0	63.6	1	35	#NULL!	17.27	15.56	90.1	127	2	2	4.18	2	36.5	1.08	266	2	0.24	9.1	#NULL!	#NULL!	#NULL!	#NULL!	9.4	17
1	2745	2022-04-12 08:55:59	2	0	29.0657	69	1	male	1	1.7	84	No	Married	1	#NULL!	0	Digestive System	0	0	0	1	0	0	0	0	71.9	2	45.3	#NULL!	1.4	4.62	51.7	158	2	1	0	2	47.1	3.42	134	2	0.18	13.7	4.46	0.8	1.16	0	15.9	29
1	2529	2022-04-12 09:37:58	1	0	26.3702	85	4	male	1	1.57	65	No	Married	1	#NULL!	0	Reproductive System	4	0	1	1	1	0	0	0	71.3	2	31.4	#NULL!	6.8	4.7	62.9	126	2	1	7381.6	2	39	1.81	147	2	0.19	13	3.82	2.04	0.82	1	8.7	20
1	2722	2022-04-12 09:41:16	1	0	22.7204	70	1	male	1	1.73	68	No	Married	1	#NULL!	0	Digestive System	0	0	1	1	1	0	0	0	71.5	2	45.1	#NULL!	8.54	5.54	64.8	162	2	1	4.98	2	47.4	2.14	137	2	0.13	9.7	3.36	1.61	0.69	1	8.1	26
1	2750	2022-04-12 09:43:17	2	0	24.8358	66	1	female	2	1.58	62	No	Married	1	#NULL!	0	Respiratory System	0	0	1	0	0	0	0	0	72.6	2	44	#NULL!	3.9	2.68	68.4	136	2	1	4.66	2	40.5	0.99	224	2	0.28	12.4	5.82	1.81	1.44	#NULL!	9.1	18
1	2765	2022-04-13 09:07:59	1	0	20.9573	68	1	male	1	1.72	62	No	Married	1	#NULL!	0	Respiratory System	0	1	0	0	0	0	0	0	82.2	2	43.6	292	5.44	3.01	55.3	145	2	1	4.79	2	44.5	1.56	156	2	0.14	9.1	5.29	1.54	1.19	#NULL!	12.1	20
1	2623	2022-04-13 14:37:50	1	0	23.8754	79	3	male	1	1.7	69	No	Married	1	#NULL!	0	Respiratory System	4	0	0	0	0	1	0	0	75.6	2	42.6	#NULL!	5.3	3.45	65.1	142	2	1	4.08	2	43	1.12	224	2	0.2	9.1	3.64	1.5	0.93	1	10.5	14
1	2719	2022-04-14 08:45:38	1	1	#NULL!	75	2	male	1	1.7	#NULL!	Yes	Married	1	#NULL!	1	Reproductive System	4	0	0	0	0	1	0	0	53.9	1	28.8	#NULL!	2.31	1.5	64.9	48	1	1	1.59	1	14	0.67	15	1	#NULL!	#NULL!	2.98	1.69	0.68	1	13.3	6
1	2658	2022-04-14 08:46:16	1	0	21.6413	72	2	female	2	1.52	50	No	Married	1	#NULL!	0	Respiratory system	0	1	0	0	0	1	0	0	64.4	1	38	#NULL!	4.15	1.87	45	117	1	1	3.92	1	35.7	1.66	135	2	0.13	9.6	4.6	1.52	1.39	0	4.6	12
1	2838	2022-04-14 09:30:18	2	1	19.8839	70	1	male	1	1.78	63	No	Married	1	#NULL!	0	Reproductive system	4	0	1	1	0	0	0	0	66.3	1	37	#NULL!	8.05	5.71	70.8	128	2	2	4.42	2	38.9	1.61	260	2	0.21	8	#NULL!	#NULL!	#NULL!	#NULL!	14.1	10
1	2716	2022-04-15 09:23:54	2	0	24.1965	81	4	female	2	1.48	53	No	Widowed	0	#NULL!	0	Respiratory system	4	0	1	0	1	0	0	0	65.6	1	33.3	#NULL!	6.12	4.14	67.5	118	1	2	4.38	2	35.7	1.26	174	2	0.15	8.6	#NULL!	#NULL!	#NULL!	#NULL!	11.1	12
1	2798	2022-04-15 10:40:39	1	0	23.4375	70	1	male	1	1.6	60	No	Married	1	#NULL!	0	Digestive System	0	0	0	0	0	0	0	0	69.8	2	43.7	#NULL!	5.87	3.85	65.6	163	2	1	5.09	2	48.2	1.23	157	2	0.18	11.1	#NULL!	#NULL!	#NULL!	#NULL!	21	29
1	2697	2022-04-16 08:22:12	1	1	16.4062	66	1	male	1	1.6	42	No	Married	1	#NULL!	0	Digestive System	0	0	0	0	0	0	0	0	61.6	1	37.9	#NULL!	6.43	3.05	47.4	137	2	1	4.21	2	39.3	2.56	201	2	0.19	9.3	4.07	0.55	1.17	0	7.5	61
1	2850	2022-04-16 08:57:01	2	0	26.4855	70	1	male	1	1.53	62	No	Married	1	#NULL!	0	Digestive System	0	1	0	0	0	0	0	0	69.4	2	43.3	#NULL!	3.02	1.73	57.4	140	2	1	4.15	2	39.1	0.93	131	2	0.12	9.3	#NULL!	#NULL!	#NULL!	#NULL!	25	20
1	2732	2022-04-16 09:10:11	1	0	28.3937	70	1	male	1	1.72	84	No	Married	1	#NULL!	0	Digestive System	0	0	1	0	0	0	0	0	80.5	2	49.6	#NULL!	5.24	3.38	64.5	124	2	1	3.79	1	35.2	1.42	267	2	0.2	7.6	#NULL!	#NULL!	#NULL!	#NULL!	7.6	17
1	2808	2022-04-16 09:39:12	1	1	17.9931	67	1	male	1	1.7	52	No	Married	1	#NULL!	0	Digestive System	4	0	0	0	0	0	0	0	68.2	2	40.4	#NULL!	5.01	3.29	65.6	159	2	1	5	2	45.8	1.38	146	2	0.16	10.8	#NULL!	#NULL!	#NULL!	#NULL!	5.8	20
1	2731	2022-04-16 10:26:43	2	0	22.0386	82	4	male	1	1.65	60	No	Married	1	#NULL!	0	Urinary System	0	0	1	0	0	1	0	0	76.6	2	44.7	#NULL!	7.38	5.96	80.8	172	2	2	5.3	2	50.7	0.85	311	3	0.31	9.9	#NULL!	#NULL!	#NULL!	#NULL!	8	35
1	2832	2022-04-16 10:41:32	2	1	20.1951	78	3	male	1	1.62	53	No	Married	1	#NULL!	0	Digestive System	4	0	0	0	0	0	0	0	69	2	41.1	280	6.87	4.39	63.9	156	2	1	4.98	2	45	1.94	151	2	0.14	9.2	7.63	1.66	1.58	#NULL!	15.7	18
1	2819	2022-04-17 10:06:24	1	1	14.8789	66	1	male	1	1.7	43	No	Married	1	#NULL!	0	Digestive System	4	0	0	0	0	0	0	0	77.7	2	39.9	147	12.34	8.8	71.4	126	2	2	4.1	2	37.2	2.1	514	3	0.42	8.2	5.76	1.29	1.25	#NULL!	6.5	8
1	2735	2022-04-18 10:05:29	2	1	#NULL!	85	4	female	2	#NULL!	#NULL!	Yes	Married	1	#NULL!	0	Digestive System	0	0	0	1	0	0	0	1	61.7	1	25.9	#NULL!	8.18	6.55	80.1	108	1	2	3.25	1	31.5	0.77	191	2	0.21	10.8	#NULL!	#NULL!	#NULL!	#NULL!	90.1	130
1	2785	2022-04-18 10:11:11	1	0	21.9076	79	3	female	2	1.57	54	No	Widowed	0	#NULL!	0	Respiratory System	0	0	0	1	0	1	0	0	66.5	1	27.2	#NULL!	48.12	3	6.2	119	1	1	5.78	2	38	42.66	160	2	#NULL!	#NULL!	4.68	1.93	0.53	1	9.6	11
1	2786	2022-04-18 10:19:04	2	1	18.8189	76	3	male	1	1.63	50	No	Married	1	#NULL!	0	Respiratory System	4	0	0	0	0	0	0	1	62.7	1	31	#NULL!	4.14	2.52	61.1	135	2	1	4.13	2	40	0.98	164	2	0.14	8.4	#NULL!	#NULL!	#NULL!	#NULL!	9	17
1	2747	2022-04-18 10:43:19	2	0	24.1546	78	3	female	2	1.38	46	No	Widowed	0	#NULL!	0	Digestive System	0	0	0	0	0	0	0	0	71.6	2	38.2	#NULL!	3.71	2.15	57.9	118	1	1	4.12	2	35.7	1.31	276	2	0.26	9.6	#NULL!	#NULL!	#NULL!	#NULL!	114.9	203
1	2797	2022-04-18 11:25:07	1	0	20.5078	75	2	male	1	1.6	52.5	No	Married	1	#NULL!	0	Respiratory System	0	1	0	0	0	0	0	0	66.6	1	37.9	#NULL!	4.28	2.8	65.3	112	1	1	3.31	1	32.5	1.05	128	2	0.18	14.1	4.27	0.93	1.3	0	9.2	34
1	2818	2022-04-18 18:33:25	1	1	16.9796	72	2	male	1	1.75	52	No	Married	1	#NULL!	0	Digestive System	4	0	1	0	0	1	0	0	65.8	1	26.5	57	8.76	7.51	85.7	105	1	2	3.52	1	31.3	0.98	171	2	0.15	9	3.26	0.87	0.89	1	15.2	5
1	2843	2022-04-19 09:59:54	1	0	23.1481	67	1	male	1	1.8	75	No	Married	1	#NULL!	0	Respiratory System	4	0	0	0	0	0	0	0	69.9	2	39.5	#NULL!	8.94	7.34	82.1	128	2	2	4.06	2	38	1.02	182	2	0.19	10.3	3.49	1.12	0.99	1	7.2	29
1	2682	2022-04-19 10:50:27	1	0	27.7344	69	1	female	2	1.6	71	No	Married	1	#NULL!	0	Respiratory system	0	0	1	0	0	0	0	0	71.5	2	44.6	#NULL!	4.74	2.72	57.5	137	2	1	4.33	2	40.3	1.68	171	2	0.18	10.2	3.25	1.15	1.3	0	10.3	19
1	2424	2022-04-19 11:10:09	1	0	24.2215	75	2	male	1	1.7	70	No	Married	1	#NULL!	0	Respiratory System	4	0	0	0	0	1	0	0	68.8	2	41.1	#NULL!	3.82	2.03	53.3	97	1	1	2.84	1	27.9	1.21	207	2	0.17	8.1	2.57	1.99	0.63	1	5	9
1	2814	2022-04-19 14:18:05	1	0	21.5139	67	1	male	1	1.67	60	No	Married	1	#NULL!	0	Digestive System	0	1	0	0	0	0	0	0	61	1	40.3	#NULL!	2.9	1.23	42.4	150	2	1	5.07	2	44.5	1.2	94	1	0.09	9.2	4.3	1.49	1.15	1	9.2	18
1	2907	2022-04-19 15:08:53	1	0	34.5473	70	1	female	2	1.55	83	No	Widowed	0	#NULL!	0	Digestive System	0	1	1	1	0	0	0	0	73.3	2	39.5	#NULL!	9.69	7.1	73.2	121	2	2	4.08	2	37.2	1.64	242	2	0.26	10.8	4.63	1.56	1.35	0	5.3	41
1	2723	2022-04-20 08:32:16	1	0	22.7732	69	1	male	1	1.65	62	No	Widowed	0	#NULL!	0	Respiratory System	4	0	0	0	0	1	0	0	65.1	1	36.2	171	8.36	5.25	62.8	132	2	1	4.58	2	38.8	1.82	288	2	0.24	8.2	3.02	1.07	0.72	1	6.1	20
1	2809	2022-04-20 09:30:28	1	0	21.9671	74	2	male	1	1.68	62	No	Married	1	#NULL!	0	Blood System	4	0	0	0	0	0	0	0	67.3	1	42.1	#NULL!	3.02	1.38	45.8	137	2	1	4.6	2	40.9	1.01	170	2	0.17	10	#NULL!	#NULL!	#NULL!	#NULL!	7.4	70
1	2866	2022-04-20 10:36:42	2	1	19.9792	66	1	female	2	1.55	48	No	Widowed	0	#NULL!	0	Digestive System	4	1	0	0	0	0	0	0	68.5	2	37.1	#NULL!	3.34	1.73	51.8	109	1	1	3.92	1	34.2	1.28	230	2	0.22	9.7	#NULL!	#NULL!	#NULL!	#NULL!	5.3	18
1	2885	2022-04-20 14:58:37	1	0	26.6389	74	2	female	2	1.55	64	No	Married	1	#NULL!	0	Digestive System	0	0	0	0	0	0	0	0	72.8	2	43.2	#NULL!	5.97	4.21	70.5	168	2	2	5.47	2	51.1	1.25	141	2	0.15	10.7	5.58	0.97	1.59	#NULL!	14.9	21
1	2804	2022-04-21 09:05:54	1	1	16.9753	89	5	male	1	1.8	55	No	Married	1	#NULL!	0	Reproductive System	0	0	0	0	0	1	0	0	66.1	1	37.3	#NULL!	12.58	10.52	83.6	138	2	2	4.43	2	40	0.88	212	2	0.19	8.8	#NULL!	#NULL!	#NULL!	#NULL!	19.9	19
1	2739	2022-04-21 09:21:09	1	1	16.5889	75	2	female	2	1.61	43	No	Married	1	#NULL!	0	Digestive System	0	0	1	1	0	0	0	0	66.6	1	35.4	#NULL!	6.3	5.39	75.9	132	2	2	4.2	2	39.2	1.26	196	2	0.19	9.8	#NULL!	#NULL!	#NULL!	#NULL!	11.7	12
1	2829	2022-04-21 09:56:41	2	0	23.4375	83	4	male	1	1.6	60	No	Other	3	#NULL!	0	Reproductive System	0	0	0	0	0	0	0	0	58.7	1	37.6	#NULL!	5.1	4.71	69.4	163	2	1	1.3	1	47.7	1.61	275	2	0.28	10	#NULL!	#NULL!	#NULL!	#NULL!	8.3	13
1	2872	2022-04-21 15:36:08	1	0	22.0932	68	1	male	1	1.78	70	No	Married	1	#NULL!	0	Respiratory system	0	1	0	0	0	0	0	0	64.1	1	40	#NULL!	4.63	2.88	62.2	146	2	1	4.62	2	42.5	1.03	71	1	0.12	16.3	#NULL!	#NULL!	#NULL!	#NULL!	10.7	19
1	2772	2022-04-22 08:40:35	1	0	21.4533	69	1	male	1	1.7	62	No	Married	1	#NULL!	0	Respiratory system	4	0	0	0	0	0	0	0	74.3	2	37.9	81	5.76	3.8	65.8	133	2	1	4.46	2	39.1	1.35	248	2	0.25	10	3.7	0.94	1.12	1	12	15
1	2554	2022-04-22 08:44:02	2	1	20.4382	67	1	female	2	1.67	57	No	Married	1	#NULL!	0	Reproductive System	0	0	0	0	0	0	0	1	53	1	32.8	255	4.11	2.23	54.3	126	2	1	3.62	1	38	1.43	206	2	0.18	8.8	5.16	2.38	1.06	1	4.4	40
1	2811	2022-04-22 09:26:10	1	0	29.3413	76	3	female	2	1.43	60	No	Married	1	#NULL!	0	Respiratory System	4	0	0	0	0	1	0	0	55	1	37.4	#NULL!	7.32	5.9	80.5	113	1	2	3.54	1	34.6	0.65	161	2	0.15	9	5.17	1.2	1.47	0	12	17
1	2662	2022-04-22 09:45:26	1	1	#NULL!	77	3	male	1	1.65	#NULL!	Yes	Married	1	#NULL!	0	Exercise system	4	0	1	0	0	0	0	1	22.6	1	26.9	55	71	16.09	97.6	134	2	2	0	2	39.1	0.26	45	1	0.05	10.6	2.9	2.04	0.26	1	14.2	15
1	2684	2022-04-22 11:53:18	1	1	19.3698	76	3	male	1	1.76	60	No	Married	1	#NULL!	0	Digestive System	4	0	0	0	0	0	0	0	65.9	1	32.2	#NULL!	6.59	5.22	79.2	71	1	2	4.48	2	25	0.85	243	2	#NULL!	#NULL!	2.73	0.56	1.18	0	5	18
1	2831	2022-04-23 08:55:29	1	0	21.9138	74	2	female	2	1.48	48	No	Married	1	#NULL!	0	Reproductive System	0	0	0	0	0	0	0	1	76.7	2	31.9	116	5.56	4.35	78.1	124	2	2	3.9	1	36.7	0.89	279	2	0.27	9.6	5.15	2.1	1.03	1	7.1	6
1	2848	2022-04-23 09:26:01	2	0	22.0386	70	1	male	1	1.65	60	No	Married	1	#NULL!	0	Urinary System	4	0	0	0	0	0	0	1	65.3	1	22.3	#NULL!	9.84	6.54	66.4	77	1	1	2.82	1	24.5	2.69	319	3	0.28	8.6	#NULL!	#NULL!	#NULL!	#NULL!	9.2	7
1	2918	2022-04-23 09:29:13	2	0	21.9899	83	4	male	1	1.61	57	No	Married	1	#NULL!	0	Respiratory System	0	0	0	0	0	0	0	0	69.7	2	38.7	#NULL!	4.22	2.05	48.6	153	2	1	4.9	2	45	1.39	142	2	0.14	9.6	5.05	0.62	1.59	0	12.6	18
1	2891	2022-04-24 09:40:52	2	0	22.8269	79	3	female	2	1.48	50	No	Married	1	#NULL!	0	Blood System	4	1	1	0	0	0	0	0	66.5	1	42.4	#NULL!	12	2.1	53.5	138	2	1	1.1	1	40	1.38	126	2	0.17	13.4	6.82	4.33	1.14	#NULL!	6.8	13
1	2681	2022-04-24 10:01:07	1	1	20.1956	72	2	male	1	1.68	57	No	Other	3	#NULL!	0	Digestive System	0	1	1	0	0	0	0	0	60.2	1	35.1	#NULL!	4.75	3.28	68.8	112	1	1	3.63	1	33.3	1.03	132	2	0.15	11.3	4.26	1.27	1	1	6.8	15
1	2886	2022-04-25 10:06:22	1	0	24.2215	67	1	male	1	1.7	70	No	Married	1	#NULL!	0	Respiratory System	0	0	1	1	0	0	0	0	65.8	1	40.9	#NULL!	10.8	3.65	54.1	151	2	1	5.4	2	43.9	2.32	182	2	0.18	9.9	5.78	3.38	0.62	#NULL!	10.8	24
1	2934	2022-04-25 10:48:34	1	1	19.9792	65	1	female	2	1.55	48	No	Married	1	#NULL!	0	Respiratory System	0	1	0	0	0	0	0	0	73	2	39.5	#NULL!	9.18	7.43	80.9	148	2	2	4.79	2	43.6	0.97	224	2	0.24	10.6	4.82	1.11	1.14	1	15.1	35
1	2917	2022-04-26 08:28:36	1	0	21.0938	65	1	male	1	1.6	54	No	Married	1	#NULL!	0	Reproductive System	4	0	0	0	0	0	0	0	70	2	40.6	#NULL!	7.91	3.34	42.2	150	2	1	4.69	2	43	3.36	240	2	0.27	11.1	5.74	1.69	1	#NULL!	24.3	14
1	2874	2022-04-26 09:09:17	1	0	24.977	68	1	male	1	1.65	68	No	Married	1	#NULL!	0	Other	0	0	1	1	1	1	0	0	65	1	40.9	#NULL!	148.5	3.08	65	161	2	1	7.2	2	46	1.28	177	2	0.19	10.4	3.65	2.73	0.82	1	11.8	20
1	2856	2022-04-26 10:29:59	1	0	26.7094	69	1	female	2	1.56	65	No	Married	1	#NULL!	0	Reproductive System	0	0	0	0	0	0	0	0	74.6	2	39.7	#NULL!	4.42	2.81	63.5	131	2	2	4.19	2	38.8	0.77	211	2	0.23	10.9	#NULL!	#NULL!	#NULL!	#NULL!	13.4	15
1	2836	2022-04-26 10:36:58	1	1	19.5717	81	4	female	2	1.63	52	No	Married	1	#NULL!	0	Respiratory System	0	0	1	1	0	0	0	1	57.4	1	31.2	#NULL!	5.7	4.2	73.6	132	2	2	4.28	2	37	0.87	277	2	0.25	9.1	4.09	1.48	0.86	1	10.4	20
1	3035	2022-04-26 12:01:35	1	0	27.6817	74	2	male	1	1.7	80	No	Other	3	#NULL!	0	Respiratory System	4	0	1	0	0	0	0	0	69.8	2	36.8	#NULL!	12.38	9.24	74.7	142	2	2	4.27	2	41.2	2.23	349	3	0.29	8.4	#NULL!	#NULL!	#NULL!	#NULL!	11.8	11
1	2675	2022-04-26 12:03:32	1	0	22.2656	82	4	male	1	1.6	57	No	Married	1	#NULL!	0	Respiratory System	4	0	0	0	0	0	0	0	61.8	1	34.9	#NULL!	5.26	2.1	40	125	2	1	3.74	1	36	1.37	139	2	0.14	10	5.74	1.58	0.62	#NULL!	8.6	32
1	2803	2022-04-27 08:31:30	2	0	27.3923	81	4	female	2	1.48	60	No	Married	1	#NULL!	0	Respiratory System	0	0	1	0	0	0	0	1	73.6	2	38.4	#NULL!	7.32	5.54	75.7	142	2	2	4.73	2	42	1.26	248	2	0.24	9.9	3.85	0.83	1.03	1	11.2	15
1	2921	2022-04-27 09:05:05	1	0	23.4375	74	2	male	1	1.6	60	No	Married	1	#NULL!	0	Respiratory System	0	0	1	0	0	0	0	0	65.2	1	37	#NULL!	5.27	3.69	70.1	123	2	2	4.17	2	36.8	0.73	248	2	0.2	7.9	5.63	0.77	1.54	#NULL!	6.9	9
1	2846	2022-04-27 09:18:08	1	1	20.2812	84	4	male	1	1.72	60	No	Widowed	0	#NULL!	0	Digestive System	0	0	0	1	0	0	0	1	58.8	1	38.9	#NULL!	10.71	9.08	84.8	161	2	2	4.89	2	46.9	0.8	199	2	0.2	10	5.85	0.83	1.6	#NULL!	23.2	15
1	2825	2022-04-27 09:36:44	1	1	21.2245	93	5	male	1	1.75	65	No	Married	1	#NULL!	0	Other	0	1	1	0	1	1	0	0	65.3	1	27.4	#NULL!	10.15	6.64	65.3	83	1	1	2.71	1	23.7	2.62	404	3	0.34	8.4	2.08	0.65	0.66	1	3.5	40
1	3040	2022-04-28 08:10:30	1	0	27.6095	69	1	male	1	1.67	77	No	Married	1	#NULL!	0	Respiratory System	4	0	0	0	0	0	0	0	65.4	1	36.7	233	3.5	3.08	61.1	143	2	2	1.2	1	41.1	0.95	199	2	0.21	10.5	6.02	2.06	0.98	#NULL!	9.3	15
1	2983	2022-04-28 09:30:25	1	0	21.6713	65	1	male	1	1.65	59	No	Married	1	#NULL!	0	Respiratory System	4	0	0	0	0	0	0	0	57.3	1	35.5	#NULL!	4.67	2.84	60.7	141	2	1	4.49	2	41.5	1.18	222	2	0.22	9.9	6.07	1.65	1.39	#NULL!	7.8	16
1	2899	2022-04-28 09:30:40	2	0	22.6003	68	1	female	2	1.56	55	No	Other	3	#NULL!	0	Respiratory System	4	1	0	0	0	0	0	0	72.1	2	38.6	#NULL!	7.83	4.28	54.6	121	2	1	3.83	1	35.2	2.94	252	2	0.22	8.6	#NULL!	#NULL!	#NULL!	#NULL!	7.2	45
1	2897	2022-04-29 09:40:46	1	1	#NULL!	73	2	male	1	#NULL!	#NULL!	Yes	Married	1	#NULL!	0	Digestive System	0	1	0	0	0	0	0	0	75.4	2	43.6	#NULL!	8.37	5.2	62.2	155	2	1	5.03	2	45.2	2.05	219	2	0.19	8.7	#NULL!	#NULL!	#NULL!	#NULL!	11.3	16
1	2879	2022-04-29 10:03:22	1	0	22.1453	66	1	male	1	1.7	64	No	Married	1	#NULL!	0	Respiratory System	0	0	1	0	0	0	0	0	68.1	2	39.7	#NULL!	6.61	4.73	71.6	137	2	2	4.28	2	39.7	1.23	200	2	0.2	9.8	5.85	1.76	1.18	#NULL!	8.2	20
1	3062	2022-04-29 10:10:37	1	1	16.2331	91	5	female	2	1.55	39	No	Widowed	0	#NULL!	0	Other	0	0	0	0	1	0	0	0	63.5	1	31.7	#NULL!	5.14	3.27	63.6	127	2	1	4.11	2	37.6	1.28	245	2	0.27	10.9	3.82	0.79	1.32	0	10.2	7
1	2888	2022-04-29 10:52:46	2	0	22.6757	67	1	female	2	1.47	49	No	Married	1	#NULL!	0	Respiratory System	0	0	0	0	0	0	0	0	71.8	2	42	#NULL!	5.14	2.8	54.4	147	2	1	4.85	2	41.6	1.86	231	2	0.21	9	5.76	5.67	1.03	#NULL!	11	20
1	2726	2022-04-29 15:05:12	1	0	25.7117	79	3	male	1	1.65	70	No	Married	1	#NULL!	0	Endocrine System	0	1	0	1	0	1	0	0	63.2	1	39.1	#NULL!	1.1	3.36	69.9	159	2	2	1.1	1	44.7	0.96	150	2	0.16	10.7	#NULL!	#NULL!	#NULL!	#NULL!	21.6	20
1	2941	2022-04-30 09:38:57	1	0	24.4444	71	2	female	2	1.5	55	No	Married	1	#NULL!	0	Reproductive System	4	0	1	0	0	0	0	0	58	1	35.4	#NULL!	6.49	5.62	86.4	106	1	2	3.46	1	32.6	0.59	178	2	0.18	9.9	#NULL!	#NULL!	#NULL!	#NULL!	9.1	13
1	2882	2022-04-30 09:41:00	1	0	25.711	75	2	male	1	1.59	65	No	Other	3	#NULL!	0	Reproductive System	0	0	0	1	0	0	0	0	56.2	1	29.8	#NULL!	2.21	1.41	63.4	112	1	1	3.55	1	33	0.49	52	1	0.07	12.4	#NULL!	#NULL!	#NULL!	#NULL!	34.9	25
1	3002	2022-04-30 10:10:41	1	1	17.9688	81	4	male	1	1.6	46	No	Married	1	#NULL!	0	Exercise System	4	0	0	0	0	0	0	0	74.1	2	44.8	#NULL!	4.97	3.94	79.4	161	2	2	5.12	2	47.8	0.63	202	2	0.21	10.4	5.36	0.8	1.58	#NULL!	18.2	11
1	3014	2022-04-30 10:17:17	1	0	22.1453	66	1	male	1	1.7	64	No	Married	1	#NULL!	0	Respiratory system	4	0	0	0	0	0	0	0	69.3	2	45	#NULL!	3.46	2.22	64.3	137	2	1	4.48	2	42.1	0.9	140	2	0.14	9.9	6.05	0.74	1.77	#NULL!	8.6	9
1	2852	2022-04-30 10:49:01	2	0	21.1827	76	3	male	1	1.69	60.5	No	Married	1	#NULL!	0	Reproductive system	4	0	1	0	0	0	0	0	61.9	1	39.6	#NULL!	5.72	3.58	62.6	139	2	1	4.57	2	41.1	1.83	211	2	0.21	9.9	4.87	1.03	1.35	0	12.5	17
1	2901	2022-04-30 11:34:13	1	0	21.7993	65	1	male	1	1.7	63	No	Married	1	#NULL!	0	Respiratory system	4	0	1	0	0	0	0	0	57.5	1	34	#NULL!	4.56	2.24	49.1	127	2	1	3.83	1	37.6	1.14	185	2	0.16	8.4	#NULL!	#NULL!	#NULL!	#NULL!	3.7	22
1	2940	2022-05-01 08:39:19	2	1	17.9089	66	1	male	1	1.62	47	No	Married	1	#NULL!	0	Respiratory system	4	0	0	0	0	0	0	1	68.5	2	25.8	#NULL!	6.95	4.76	68.6	87	1	1	3.22	1	27.1	1.6	522	3	0.51	9.8	3.97	0.73	0.82	1	6.1	11
1	2794	2022-05-01 09:58:46	1	1	18.369	68	1	female	2	1.53	43	No	Married	1	#NULL!	0	Respiratory system	0	0	0	0	0	0	0	0	71.4	2	39.9	#NULL!	6.72	4.78	71.3	148	2	2	4.61	2	43.3	1.12	387	3	0.34	8.8	6.48	1.29	1.03	#NULL!	6.1	12
1	2822	2022-05-01 10:04:14	1	0	23.6614	79	3	male	1	1.72	70	No	Married	1	#NULL!	0	Reproductive system	0	0	1	0	0	0	0	0	71.5	2	39.4	#NULL!	8.63	5.64	65.4	122	2	1	3.95	1	35	2	186	2	0.16	8.8	5.54	1.16	1.06	#NULL!	16.4	11
1	2988	2022-05-01 14:46:17	1	0	28.8523	76	3	female	2	1.43	59	No	Married	1	#NULL!	0	Respiratory system	4	0	0	0	0	1	0	0	45.8	1	29.4	#NULL!	5.08	3.65	71.9	115	1	2	3.52	1	34	0.37	121	2	0.11	9	4.38	1.61	1.03	1	10.3	15
1	2969	2022-05-02 09:13:26	1	1	19.025	74	2	female	2	1.45	40	No	Widowed	0	#NULL!	0	Reproductive System	4	0	0	0	0	0	0	0	76	2	42	186	3.42	2.44	71.4	133	2	2	4.52	2	39.2	0.66	282	2	0.23	8.3	5.12	0.95	1.31	1	11.4	7
1	2858	2022-05-02 10:57:22	1	1	19.1327	72	2	male	1	1.68	54	No	Married	1	#NULL!	0	Urinary System	0	1	1	0	0	1	0	0	62.8	1	31.7	#NULL!	12.14	10.04	82.8	101	1	2	3.2	1	28	0.61	115	2	0.11	9.5	#NULL!	#NULL!	#NULL!	#NULL!	18.4	19
1	3050	2022-05-03 08:52:14	1	0	21.7865	70	1	female	2	1.53	51	No	Married	1	#NULL!	0	Respiratory System	4	0	0	0	0	0	0	0	82	2	48.4	271	3.53	2.28	64.9	144	2	1	4.69	2	43	0.92	148	2	0.18	11.8	6.27	1.89	1.35	#NULL!	11.2	11
1	2849	2022-05-03 10:31:38	2	1	20.2812	75	2	male	1	1.72	60	No	Married	1	#NULL!	0	Urinary System	4	0	1	0	0	0	0	0	68.6	2	39.4	#NULL!	6.17	4.05	65.7	144	2	1	4.48	2	41	1.4	158	2	0.15	9.4	#NULL!	#NULL!	#NULL!	#NULL!	6.4	12
1	2859	2022-05-03 10:32:03	1	0	20.8611	70	1	male	1	1.71	61	No	Married	1	#NULL!	0	Respiratory System	4	0	0	0	0	0	0	0	65.2	1	28.5	#NULL!	9.96	8.64	86.8	128	2	2	4.89	2	39	0.9	209	2	0.21	10.2	#NULL!	#NULL!	#NULL!	#NULL!	6.1	10
1	3001	2022-05-04 08:40:58	1	1	13.8408	66	1	male	1	1.7	40	No	Married	1	#NULL!	0	Digestive System	4	0	0	0	0	0	0	0	64.9	1	30.3	137	16.2	12.32	76	110	1	2	3.62	1	32.8	1.74	509	3	0.41	8	4.31	1.18	1.1	1	14.8	13
1	3006	2022-05-04 09:59:17	2	0	21.9289	73	2	female	2	1.51	50	No	Married	1	#NULL!	0	Digestive System	0	1	1	0	0	0	0	0	66.7	1	37.6	#NULL!	4.63	2.03	43.8	125	2	1	3.56	1	35.8	1.7	95	1	0.1	10	#NULL!	#NULL!	#NULL!	#NULL!	18.4	17
1	3048	2022-05-05 01:59:00	2	1	#NULL!	72	2	female	2	1.6	#NULL!	Yes	Married	1	#NULL!	1	Digestive System	4	0	1	0	0	1	0	0	59.3	1	25.2	#NULL!	22.49	20.75	92.2	97	1	2	3.67	1	32.4	0.82	600	3	0.6	10	#NULL!	#NULL!	#NULL!	#NULL!	11.2	47
1	2991	2022-05-05 08:48:37	1	0	20.9573	68	1	male	1	1.72	62	No	Married	1	#NULL!	0	Respiratory System	0	1	0	0	0	0	0	0	78.7	2	42.4	272	5.81	3.54	61	156	2	1	5.08	2	47.1	1.56	127	2	0.11	8.6	5.14	1.15	1.11	1	7.8	17
1	2922	2022-05-06 09:11:18	1	1	19.5609	70	1	female	2	1.43	40	No	Married	1	#NULL!	0	Reproductive System	4	0	0	0	1	0	0	1	20.6	1	27.4	88	4.49	2.63	58.6	78	1	1	2.75	1	23.9	1.26	298	2	0.27	9.2	2.04	0.77	0.73	1	5.4	68
1	2964	2022-05-06 09:11:24	1	0	34.5168	70	1	female	2	1.56	84	No	Married	1	#NULL!	0	Digestive System	0	0	1	1	1	0	0	0	68.4	2	36.9	364	9.12	5.71	62.6	108	1	1	3.62	1	32	2.28	237	2	0.24	10	#NULL!	#NULL!	#NULL!	#NULL!	3	28
1	3011	2022-05-06 09:39:06	1	0	23.1834	69	1	male	1	1.7	67	No	Married	1	#NULL!	0	Digestive System	0	0	1	0	1	0	0	0	61.1	1	36.7	#NULL!	6.1	4.46	55.6	179	2	1	0	2	51.4	2.61	146	2	0.2	13.5	6.2	2.75	0.89	#NULL!	11.8	39
1	3045	2022-05-06 11:47:28	1	0	24.5578	73	2	female	2	1.55	59	No	Married	1	#NULL!	0	Reproductive System	0	0	0	1	0	0	0	0	75.9	2	43	#NULL!	5.33	2.65	49.6	141	2	1	4.61	2	41.4	2.3	214	2	0.25	11.9	#NULL!	#NULL!	#NULL!	#NULL!	10	10
1	2944	2022-05-08 09:35:06	1	0	25.721	75	2	male	1	1.54	61	No	Married	1	#NULL!	0	Blood System	0	0	0	0	0	0	0	0	66.9	1	39.5	#NULL!	4.37	2.66	60.9	142	2	1	4.43	2	42.6	1.24	140	2	0.18	12.7	#NULL!	#NULL!	#NULL!	#NULL!	17.2	17
1	3056	2022-05-08 10:15:26	1	1	13.9578	87	5	male	1	1.65	38	No	Married	1	#NULL!	0	Digestive System	0	0	1	0	1	0	0	0	40.9	1	25.6	#NULL!	2.4	1.87	77.8	84	1	2	3.07	1	26.5	0.41	160	2	0.14	8.7	#NULL!	#NULL!	#NULL!	#NULL!	9.3	5
1	2894	2022-05-08 14:40:09	2	0	27.6817	69	1	male	1	1.7	80	No	Married	1	#NULL!	0	Digestive System	0	0	0	0	0	0	0	0	66.7	1	41.3	#NULL!	7.63	5.51	72.1	150	2	2	4.86	2	44.6	1.48	132	2	0.18	13.2	3.55	0.69	0.95	1	22.6	28
1	3026	2022-05-09 09:56:46	1	0	24.8889	78	3	female	2	1.5	56	No	Married	1	#NULL!	0	Digestive System	0	1	0	0	0	0	0	0	61.8	1	39.4	225	20.6	#NULL!	#NULL!	#NULL!	2	#NULL!	19.8	2	#NULL!	#NULL!	#NULL!	2	#NULL!	#NULL!	#NULL!	#NULL!	#NULL!	#NULL!	14.4	11
1	2938	2022-05-09 10:03:17	1	0	25.3331	73	2	female	2	1.46	54	No	Married	1	#NULL!	0	Digestive System	4	0	0	0	0	0	0	0	71.7	2	35.5	#NULL!	5.3	3.69	52.5	150	2	1	1.1	1	44	2.46	177	2	0.2	11.1	#NULL!	#NULL!	#NULL!	#NULL!	15.8	17
1	3055	2022-05-10 08:35:47	1	0	20.7967	67	1	male	1	1.67	58	No	Married	1	#NULL!	0	Digestive System	0	1	0	1	0	0	0	0	59.3	1	38.1	#NULL!	5.39	3.3	61.2	146	2	1	4.86	2	43	1.44	125	2	0.13	10.3	#NULL!	#NULL!	#NULL!	#NULL!	15.9	12
1	3016	2022-05-10 09:10:00	1	0	22.83	78	3	female	2	1.45	48	No	Married	1	#NULL!	0	Digestive System	4	0	1	0	0	0	0	0	60.5	1	37	#NULL!	7.49	5.53	74	136	2	2	4.43	2	39.7	1.33	397	3	0.41	10.3	4.42	1.3	1.28	0	9	21
1	2974	2022-05-10 09:10:17	1	0	22.6757	71	2	male	1	1.68	64	No	Widowed	0	#NULL!	0	Respiratory System	4	0	1	0	0	0	0	0	73.2	2	44	#NULL!	5.81	3.7	63.7	148	2	1	4.79	2	44.4	1.69	256	2	0.22	8.6	5.08	0.96	1.23	1	20.4	22
1	3022	2022-05-10 10:04:38	1	0	22.9398	72	2	female	2	1.52	53	No	Married	1	#NULL!	0	Reproductive System	0	0	0	0	0	0	0	0	76.3	2	44.7	#NULL!	4.85	2.5	51.5	148	2	1	4.89	2	43	1.92	265	2	0.23	8.8	5.39	1.99	1.09	#NULL!	6.3	67
1	3028	2022-05-11 08:00:07	1	1	20.3125	74	2	male	1	1.6	52	No	Married	1	#NULL!	0	Digestive System	0	1	0	0	0	0	0	0	65.5	1	40	#NULL!	5.22	3.37	64.4	151	2	1	4.58	2	43.3	1.38	307	3	0.33	10.7	#NULL!	#NULL!	#NULL!	#NULL!	15.1	73
1	3053	2022-05-11 08:29:47	1	0	23.7332	70	1	male	1	1.59	60	No	Widowed	1	#NULL!	0	Digestive System	0	0	0	0	0	0	0	0	68.4	2	41.2	168	5.79	2.6	44.9	157	2	1	4.75	2	44.8	0.96	149	2	0.17	11.4	4.04	0.72	1.14	1	12.8	34
1	3065	2022-05-11 08:36:08	1	0	21.7778	68	1	female	2	1.5	49	No	Widowed	0	#NULL!	0	Respiratory System	4	0	1	0	0	1	0	0	87.7	2	42	204	32.3	3.79	60.1	152	2	1	2.9	1	44	2.15	359	3	0.3	8.3	5.64	1.35	1.14	#NULL!	11.9	79
1	2998	2022-05-11 09:46:50	2	0	23.4509	76	3	male	1	1.74	71	No	Married	1	#NULL!	0	Reproductive system	0	0	0	1	0	0	0	0	64.4	1	35.3	#NULL!	9.41	8.28	87.9	132	2	2	4.32	2	39.2	0.83	318	3	0.3	9.3	6	0.99	0.94	#NULL!	66.5	167
1	2910	2022-05-11 10:41:33	1	0	27.968	69	1	male	1	1.67	78	No	Married	1	#NULL!	0	Respiratory system	0	0	1	0	0	0	0	0	69.3	2	38.7	#NULL!	0	3.23	55.7	154	2	1	5.5	2	45.1	2.11	208	2	0.2	9.7	3.99	1.12	0.76	1	6.4	11
1	2984	2022-05-12 08:40:00	1	0	23.8751	75	2	male	1	1.65	65	No	Other	3	#NULL!	0	Reproductive System	0	0	0	1	0	0	0	1	53.6	1	29.4	#NULL!	2.17	1.27	58.5	117	1	1	3.62	1	33	0.62	65	1	0.07	11.4	#NULL!	#NULL!	#NULL!	#NULL!	20.4	22
1	2985	2022-05-12 09:19:38	1	1	20.3125	81	4	male	1	1.6	52	No	Married	1	#NULL!	0	Other	0	0	0	1	0	0	0	0	78.2	2	40.4	#NULL!	5.61	4.07	72.5	139	2	2	4.31	2	40.6	1.18	183	2	0.21	11.5	#NULL!	#NULL!	#NULL!	#NULL!	8	17
1	2956	2022-05-12 10:03:09	1	0	22.0386	77	3	male	1	1.65	60	No	Married	1	#NULL!	0	Urinary System	0	0	1	0	0	1	0	0	75.2	2	41.3	#NULL!	5.48	3.8	69.2	148	2	1	4.85	2	44.1	1.36	148	2	0.15	9.9	#NULL!	#NULL!	#NULL!	#NULL!	21	20
1	3019	2022-05-12 15:45:00	2	0	29.6875	86	5	female	2	1.6	76	No	Widowed	0	#NULL!	0	Digestive System	0	0	0	1	0	1	0	1	60.4	1	29.3	#NULL!	10.64	8.97	84.3	100	1	2	3.03	1	29.6	0.92	182	2	0.2	10.9	3.05	0.96	0.42	1	104.1	228
1	2975	2022-05-13 08:56:17	1	1	19.5717	71	2	male	1	1.63	52	No	Other	3	#NULL!	0	Digestive System	4	0	0	0	0	0	0	0	70.8	2	40.4	144	1.2	2	47.6	106	1	1	2.4	1	33.6	1.23	65	1	0.06	9.2	3.49	0.73	1.24	0	12.3	19
1	2978	2022-05-13 09:30:51	1	1	16.6468	71	2	female	2	1.45	35	No	Married	1	#NULL!	0	Digestive System	4	0	0	0	0	0	0	0	37.7	1	16.8	#NULL!	7.3	6.01	82.1	74	1	2	2.86	1	23.2	1	258	2	0.22	8.3	#NULL!	#NULL!	#NULL!	#NULL!	4.3	22
1	2955	2022-05-13 09:40:57	2	0	22.2222	66	1	female	2	1.5	50	No	Married	1	#NULL!	0	Respiratory System	0	0	1	0	0	0	0	0	67.6	1	42.2	#NULL!	9.43	6.31	66.9	136	2	1	4.51	2	41	2.35	217	2	0.26	11.7	#NULL!	#NULL!	#NULL!	#NULL!	6.2	35
1	2981	2022-05-13 11:30:29	2	1	19.8839	70	1	male	1	1.78	63	No	Married	1	#NULL!	0	Respiratory System	4	0	1	1	0	0	0	0	56.7	1	30.8	#NULL!	13.82	11.72	84.8	121	2	2	4.11	2	36.5	1.24	345	3	0.29	8.5	3.48	0.89	0.85	1	4.9	11
1	2958	2022-05-14 10:00:25	2	0	20.8117	66	1	female	2	1.55	50	No	Married	1	#NULL!	0	Digestive System	4	1	0	0	0	1	0	0	63.8	1	34.2	#NULL!	7.5	5.71	76	104	1	2	3.69	1	32.3	1.22	311	3	0.29	9.4	#NULL!	#NULL!	#NULL!	#NULL!	4.6	17
1	2965	2022-05-15 09:52:17	1	1	#NULL!	93	5	male	1	1.78	#NULL!	Yes	Married	1	#NULL!	0	Reproductive System	0	1	1	0	1	1	0	0	79.9	2	34.3	#NULL!	11.39	8.72	76.6	96	1	2	3.18	1	29.9	1.93	220	2	0.23	10.3	#NULL!	#NULL!	#NULL!	#NULL!	10.6	26
1	3036	2022-05-15 10:47:38	1	0	20.9366	65	1	male	1	1.65	57	No	Married	1	#NULL!	0	Respiratory System	0	0	0	0	0	0	0	0	79.7	2	48.9	#NULL!	4.87	2.41	49.4	156	2	1	5.16	2	46.6	2	291	2	0.27	9.4	5.37	1.98	1.07	#NULL!	11	22
1	3196	2022-05-15 10:49:31	1	0	25.7778	67	1	female	2	1.5	58	No	Married	1	#NULL!	0	Digestive system	0	0	0	0	0	0	0	0	83.8	2	34.4	#NULL!	11.62	8.77	75.5	128	2	2	3.91	1	37.1	2.01	155	2	0.21	13.4	#NULL!	#NULL!	#NULL!	#NULL!	12.7	45
1	3172	2022-05-15 11:42:28	1	0	23.4375	74	2	male	1	1.6	60	No	Married	1	#NULL!	0	Respiratory System	4	0	0	0	0	0	0	0	65.7	1	35.6	#NULL!	6.88	5.4	78.4	136	2	2	4.57	2	40.5	0.86	338	3	0.28	8.4	#NULL!	#NULL!	#NULL!	#NULL!	10.5	16
1	3047	2022-05-16 09:08:16	1	0	22.4913	67	1	male	1	1.7	65	No	Married	1	#NULL!	0	Respiratory System	0	0	0	0	0	0	0	0	66.3	1	42.3	#NULL!	5.01	2.87	57.2	155	2	1	4.86	2	43.7	1.6	279	2	0.22	7.9	4.43	1.09	1.12	1	9.6	13
1	3007	2022-05-16 09:24:08	2	1	19.1406	83	4	male	1	1.6	49	No	Married	1	#NULL!	0	Digestive System	4	0	0	0	0	0	0	0	76.7	2	39	171	5.83	2.73	46.9	182	2	1	5.39	2	52	2.17	201	2	0.21	10.3	3.42	1.03	1.11	1	23.2	13
1	3170	2022-05-16 09:54:44	1	0	25.8065	70	1	male	1	1.55	62	No	Married	1	#NULL!	0	Digestive System	0	1	0	0	0	0	0	0	69.6	2	42.4	#NULL!	3.79	2.45	64.4	138	2	1	3.99	1	38.6	1.03	113	2	0.11	9.6	#NULL!	#NULL!	#NULL!	#NULL!	24.3	18
1	3044	2022-05-16 09:59:55	1	1	18.4425	76	3	male	1	1.63	49	No	Married	1	#NULL!	0	Respiratory System	4	0	0	0	0	0	0	1	63.4	1	32.5	#NULL!	4.03	2.23	55.3	115	1	1	3.5	1	33.4	1.05	175	2	0.16	8.8	#NULL!	#NULL!	#NULL!	#NULL!	9.2	12
1	3030	2022-05-17 11:28:03	2	0	23.3091	76	3	female	2	1.55	56	No	Widowed	0	#NULL!	0	Digestive System	0	0	1	1	0	1	0	0	60.3	1	36.8	119	7.23	4.67	64.5	136	2	1	4.52	2	39.4	2.07	207	2	0.19	9	2.58	1.73	0.85	1	11.4	11
1	3008	2022-05-18 08:20:38	1	1	18.3594	81	4	male	1	1.6	47	No	Married	1	#NULL!	0	Exercise System	4	1	0	0	0	0	0	0	54.9	1	32.7	#NULL!	4.41	3.02	68.6	135	2	2	4.34	2	40.1	0.78	195	2	0.18	9.3	4.05	0.74	1.11	1	9.6	17
1	2946	2022-05-18 09:00:02	1	0	21.1073	84	4	male	1	1.7	61	No	Widowed	0	#NULL!	0	Digestive System	0	0	0	1	0	0	0	1	74.5	2	47.2	#NULL!	10.41	8.17	78.5	196	2	2	5.98	2	57	1.16	271	2	0.26	9.7	7.48	0.78	2.13	#NULL!	26.2	36
1	3029	2022-05-18 09:13:18	1	1	#NULL!	75	2	male	1	1.7	#NULL!	Yes	Married	1	#NULL!	1	Reproductive System	4	0	0	0	0	1	0	0	51.3	1	30.6	#NULL!	4.18	1.95	46.6	64	1	1	1.93	1	19.5	1.64	192	2	0.18	9.2	2.96	1.95	0.7	1	8	15
1	3089	2022-05-18 09:19:05	1	1	21.2183	83	4	male	1	1.61	55	No	Married	1	#NULL!	0	Respiratory System	0	0	0	0	0	0	0	0	70.5	2	40.1	#NULL!	5.06	2.41	47.6	153	2	1	4.9	2	45	1.37	119	2	0.11	11.5	5.36	1.46	1.45	#NULL!	12.6	16
1	3088	2022-05-18 09:37:19	1	0	25.204	79	3	male	1	1.53	59	No	Married	1	#NULL!	0	Exercise system	4	1	0	0	0	1	0	0	71.9	2	43	#NULL!	8.85	7.39	83.4	172	2	2	5.29	2	49.6	1.07	303	3	0.27	9	5.39	1.2	1.37	#NULL!	9.3	22
1	3231	2022-05-18 09:52:20	1	1	20.202	89	5	male	1	1.65	55	No	Married	1	#NULL!	0	Reproductive System	4	0	0	0	0	0	0	0	74.9	2	42.4	#NULL!	3.4	#NULL!	#NULL!	#NULL!	1	#NULL!	3.4	1	#NULL!	#NULL!	#NULL!	1	#NULL!	#NULL!	5.86	1.94	1.22	#NULL!	13.1	11
1	3163	2022-05-18 10:32:48	1	0	21.0938	65	1	male	1	1.6	54	No	Other	3	#NULL!	0	Reproductive System	4	0	0	0	0	0	0	0	71.1	2	40.4	#NULL!	6.11	3.18	52.1	146	2	1	4.49	2	41.5	2.23	214	2	0.23	10.5	5.61	1.56	1.14	#NULL!	10.3	16
1	3100	2022-05-19 08:42:11	1	0	26.2188	69	1	male	1	1.68	74	No	Married	1	#NULL!	0	Reproductive System	4	0	1	0	0	0	0	0	63.6	1	42.2	281	4.3	2.84	65.8	139	2	1	8.6	2	40.6	0.99	122	2	0.17	13.6	6.04	5.71	1.01	#NULL!	6.5	41
1	3073	2022-05-19 09:43:24	1	1	16.4062	83	4	male	1	1.6	42	No	Married	1	#NULL!	0	Digestive system	0	1	0	0	0	0	0	0	68.8	2	42.6	#NULL!	11.7	8.44	72.1	183	2	2	5.78	2	54.5	2.51	258	2	0.25	9.5	#NULL!	#NULL!	#NULL!	#NULL!	27.4	25
1	3125	2022-05-19 12:05:11	2	0	26.7094	69	1	female	2	1.56	65	No	Married	1	#NULL!	0	Reproductive System	0	0	0	0	0	0	0	0	83.6	2	42.1	#NULL!	5.19	3.25	62.5	133	2	2	4.25	2	40	0.9	155	2	0.21	13.7	#NULL!	#NULL!	#NULL!	#NULL!	6.6	31
1	3182	2022-05-20 09:56:43	1	1	20.6575	73	2	male	1	1.69	59	No	Married	1	#NULL!	0	Digestive System	4	1	0	0	0	0	0	0	74.2	2	43.1	#NULL!	6.74	3.55	52.6	150	2	1	4.81	2	43	2.44	184	2	0.14	7.8	#NULL!	#NULL!	#NULL!	#NULL!	10.3	18
1	3103	2022-05-20 10:09:27	1	0	24.2568	79	3	female	2	1.45	51	No	Widowed	0	#NULL!	0	Digestive System	0	0	1	0	0	0	0	0	65.6	1	32.7	#NULL!	3.29	1.98	60.2	79	1	1	2.72	1	24	0.91	287	2	0.31	10.7	#NULL!	#NULL!	#NULL!	#NULL!	3.9	7
1	3131	2022-05-20 10:50:19	1	0	23.1084	67	1	male	1	1.69	66	No	Married	1	#NULL!	0	Digestive System	0	1	1	0	0	0	0	0	75.2	2	46.2	#NULL!	5.34	3.78	70.7	157	2	2	5.16	2	44.9	1.08	166	2	0.19	11.7	5.06	0.71	1.42	1	7.9	22
1	2919	2022-05-20 14:59:29	1	0	23.1834	79	3	male	1	1.7	67	No	Widowed	1	#NULL!	0	Respiratory System	0	1	0	0	1	0	0	1	62.5	1	30.7	#NULL!	2.5	5.48	72.7	138	2	2	3.8	1	41	1	247	2	0.23	9.3	3.25	0.52	1.04	1	18	6
1	3106	2022-05-21 08:38:16	1	1	20.8117	78	3	female	2	1.55	50	No	Widowed	0	#NULL!	0	Digestive System	0	0	0	0	1	0	0	0	77.6	2	43.2	217	11.29	8.93	79	151	2	2	4.67	2	43.2	1.68	186	2	0.18	9.4	2.92	1.08	1.24	0	17.1	21
1	3205	2022-05-21 09:32:39	1	0	22.4088	67	1	male	1	1.78	71	No	Married	1	#NULL!	0	Respiratory System	4	0	0	0	0	0	0	0	71.2	2	39.4	#NULL!	6.23	4.64	74.4	115	1	2	3.58	1	34	1.1	277	2	0.3	10.9	4.31	3.44	0.97	1	6.7	16
1	3074	2022-05-22 08:28:57	2	0	22.4913	80	3	male	1	1.7	65	No	Married	1	#NULL!	0	Reproductive System	4	0	1	1	0	0	0	0	58	1	34.1	#NULL!	4.14	2.3	55.5	105	1	1	3.41	1	31.1	1.5	207	2	0.16	7.8	#NULL!	#NULL!	#NULL!	#NULL!	9.5	29
1	3075	2022-05-22 09:56:48	2	1	14.8086	71	2	female	2	1.47	32	No	Married	1	#NULL!	1	Reproductive System	0	0	0	0	0	0	0	0	83	2	23.9	#NULL!	5.87	5.14	87.5	86	1	2	2.56	1	24.6	0.48	129	2	0.11	8.2	3.86	1.33	0.73	1	12.1	29
1	3154	2022-05-23 09:37:42	2	0	25.3906	74	2	male	1	1.6	65	No	Other	3	#NULL!	0	Digestive System	0	0	0	0	0	0	0	0	63.4	1	36.5	#NULL!	2.7	3.02	50.7	147	2	1	6.6	2	42.8	2.4	174	2	0.16	9	#NULL!	#NULL!	#NULL!	#NULL!	7.4	18
1	3068	2022-05-24 09:51:00	1	1	20.0796	70	1	male	1	1.67	56	No	Married	1	#NULL!	0	Respiratory System	0	0	0	0	0	0	0	0	72.9	2	45.1	#NULL!	6.68	5.12	76.6	158	2	2	5.43	2	46.7	1.11	255	2	0.24	9.4	#NULL!	#NULL!	#NULL!	#NULL!	11.9	20
1	3094	2022-05-24 17:11:05	1	0	25.8645	72	2	male	1	1.68	73	No	Married	1	#NULL!	0	Digestive System	0	1	1	0	0	1	0	0	65.8	1	35.3	73.8	8.31	6.82	82.2	119	1	2	4.14	2	35.3	0.85	221	2	0.21	9.3	#NULL!	#NULL!	#NULL!	#NULL!	20.3	18
1	3152	2022-05-25 10:12:28	1	0	21.2084	73	2	female	2	1.52	49	No	Married	1	#NULL!	0	Digestive System	0	1	1	0	0	0	0	0	60	1	32.9	#NULL!	5.08	2.56	50.4	111	1	1	2.97	1	31.1	1.78	44	1	0.05	11.4	#NULL!	#NULL!	#NULL!	#NULL!	40.6	14
1	3253	2022-05-25 14:47:40	1	1	#NULL!	65	1	male	1	#NULL!	#NULL!	Yes	Married	1	#NULL!	0	Respiratory System	0	0	0	0	0	0	0	0	58.6	1	38.8	#NULL!	6.95	5.37	77.3	138	2	2	4.19	2	38	0.71	196	2	0.18	9	5.19	0.87	1.93	0	7.8	27
1	3209	2022-05-26 09:43:06	1	0	21.7738	73	2	male	1	1.66	60	No	Married	1	#NULL!	0	Reproductive System	0	0	1	0	0	0	0	0	68.2	2	29.7	#NULL!	6.43	3.74	58.2	109	1	1	3.85	1	32.5	1.88	202	2	0.19	9.4	#NULL!	#NULL!	#NULL!	#NULL!	5.6	11
1	3095	2022-05-26 10:32:03	2	0	21.3039	75	2	male	1	1.65	58	No	Other	3	#NULL!	0	Digestive System	0	0	1	0	1	0	0	0	63.9	1	31.9	#NULL!	6.42	3.83	59.8	120	1	1	4.17	2	36.4	1.82	296	2	0.28	9.3	3.53	0.96	0.73	1	4.7	13
1	3228	2022-05-26 11:06:58	1	0	25.3331	74	2	female	2	1.46	54	No	Married	1	#NULL!	0	Digestive System	4	0	1	0	0	0	0	0	70.4	2	36.2	#NULL!	2.09	0.14	6.7	140	2	1	4.57	2	40.7	1.49	254	2	0.25	9.8	#NULL!	#NULL!	#NULL!	#NULL!	16.3	17
1	3245	2022-05-28 09:16:31	1	0	24.8016	74	2	male	1	1.68	70	No	Married	1	#NULL!	0	Blood System	4	1	1	1	1	0	0	0	65.2	1	39.2	#NULL!	7.54	5.41	71.8	132	2	2	3.94	1	39	1.26	114	2	0.15	13.3	2.66	0.85	0.82	1	4	15
1	3082	2022-05-28 11:29:53	1	1	19.0451	77	3	male	1	1.73	57	No	Married	1	#NULL!	0	Respiratory System	4	0	0	0	0	0	0	0	66.6	1	32.2	#NULL!	5.78	3.73	64.6	122	2	1	4.65	2	37.8	1.51	240	2	0.21	8.6	#NULL!	#NULL!	#NULL!	#NULL!	5.6	13
1	3110	2022-05-29 10:10:15	1	1	19.9538	76	3	female	2	1.38	38	No	Married	1	#NULL!	0	Digestive System	0	0	0	0	0	0	0	0	50.3	1	28	#NULL!	5.92	3.9	65.7	57	1	1	2.84	1	19.7	1.64	220	2	0.18	7.9	#NULL!	#NULL!	#NULL!	#NULL!	9.7	9
1	3236	2022-05-30 08:24:20	1	0	25.2994	75	2	male	1	1.54	60	No	Married	1	#NULL!	0	Blood System	4	0	0	0	0	0	0	0	66.1	1	37.8	#NULL!	3.11	1.68	54.1	142	2	1	4.41	2	42.6	0.84	113	2	0.15	12.9	#NULL!	#NULL!	#NULL!	#NULL!	14.7	18
1	3079	2022-05-30 09:09:00	1	1	19.433	83	4	male	1	1.62	51	No	Other	3	#NULL!	0	Digestive System	4	0	1	0	0	0	0	0	52.1	1	27.6	#NULL!	3.93	3.26	82.9	96	1	2	3.12	1	28.2	0.37	129	2	0.13	9.7	#NULL!	#NULL!	#NULL!	#NULL!	15.7	29
1	3134	2022-05-31 09:47:44	2	0	20.7967	67	1	male	1	1.67	58	No	Married	1	#NULL!	0	Digestive System	0	1	0	1	0	0	0	0	64.1	1	40.6	#NULL!	2.92	1.16	39.6	149	2	1	4.91	2	44	1.3	113	2	0.11	9.6	5.7	2.89	0.97	#NULL!	13.8	13
1	3208	2022-05-31 10:49:45	1	0	22.3214	74	2	male	1	1.68	63	No	Married	1	#NULL!	0	Blood System	4	0	1	0	0	0	0	0	65	1	40.6	#NULL!	3.6	1.61	44.7	136	2	1	4.61	2	40.9	1.24	173	2	0.17	9.8	#NULL!	#NULL!	#NULL!	#NULL!	7.2	28
1	3227	2022-05-31 14:14:37	2	0	21.7993	66	1	male	1	1.7	63	No	Married	1	#NULL!	0	Respiratory System	4	0	0	0	0	0	0	0	69.7	2	44.6	#NULL!	3.62	2.18	60.2	141	2	1	4.47	2	41	1.02	125	2	0.13	10.6	5.8	0.74	1.7	#NULL!	7.4	17
1	3108	2022-06-01 08:33:34	2	0	23.4375	70	1	male	1	1.6	60	No	Married	1	#NULL!	0	Digestive System	0	0	0	0	0	0	0	0	67.1	1	42.4	212	6.06	3.06	50.5	157	2	1	4.93	2	46.3	1.05	131	2	0.17	13.2	3.98	0.74	1.17	0	19.6	28
1	3176	2022-06-01 11:26:02	1	0	24.8016	73	2	male	1	1.68	70	No	Married	1	#NULL!	0	Digestive System	4	0	0	0	1	0	0	0	70	2	36.7	#NULL!	10.06	6.7	66.5	148	2	1	4.73	2	45.5	2.07	153	2	0.16	10.4	2.7	0.95	0.94	1	14.9	13
1	3185	2022-06-01 16:07:40	1	1	18.4911	87	5	female	2	1.56	45	No	Widowed	0	#NULL!	0	Urinary System	4	0	1	0	0	0	0	0	70.4	2	37.6	#NULL!	4.83	3.45	71.2	91	1	2	4.02	2	29.1	1.02	200	2	0.19	9.5	#NULL!	#NULL!	#NULL!	#NULL!	10.4	20
1	3003	2022-06-02 09:11:31	1	0	27.6095	69	1	male	1	1.67	77	No	Married	1	#NULL!	0	Respiratory System	4	0	0	0	0	0	0	0	72.2	2	39.3	297	5.95	3.11	52.2	151	2	1	4.77	2	43.6	1.55	239	2	0.25	10.4	5.46	3.8	0.85	#NULL!	10.7	20
1	3109	2022-06-02 09:22:17	1	1	19.6072	70	1	male	1	1.69	56	No	Married	1	#NULL!	0	Respiratory System	0	0	1	0	0	0	0	0	74.5	2	45.2	#NULL!	4.54	2.69	59.1	152	2	1	4.75	2	44.2	1.48	241	2	0.24	9.9	4.92	0.89	0.98	1	18.5	12
1	3148	2022-06-02 09:40:07	1	0	29.0657	69	1	male	1	1.7	84	No	Married	1	#NULL!	0	Respiratory System	0	0	1	0	1	0	0	0	65.1	1	37.4	#NULL!	4.9	2.55	52	74	1	1	1.98	1	21	1.72	7	1	#NULL!	#NULL!	#NULL!	#NULL!	#NULL!	#NULL!	8.1	25
1	3180	2022-06-03 09:09:51	1	1	17.7778	75	2	female	2	1.5	40	No	Married	1	#NULL!	0	Reproductive System	4	0	0	0	0	0	0	0	76.3	2	42.1	211	3.02	1.89	62.5	128	2	1	4.28	2	38.5	0.75	307	3	0.28	9	5.62	1.17	1.44	#NULL!	6.7	11
1	3153	2022-06-03 09:27:37	2	1	20.3074	74	2	male	1	1.69	58	No	Married	1	#NULL!	0	Digestive System	0	0	0	0	0	0	0	0	69.4	2	40.8	#NULL!	5.3	4.01	75.6	133	2	2	3.96	1	39.5	0.92	134	2	0.15	11	#NULL!	#NULL!	#NULL!	#NULL!	33	14
1	3189	2022-06-03 09:56:38	1	0	21.0772	80	3	male	1	1.63	56	No	Married	1	#NULL!	0	Respiratory System	4	1	0	1	1	0	0	0	73.6	2	35.4	#NULL!	9.42	5.81	61.8	125	2	1	4.05	2	36	2.98	335	3	0.3	9.1	2.5	0.61	0.77	1	8.8	23
1	3191	2022-06-03 09:59:15	1	0	22.2222	75	2	female	2	1.5	50	No	Widowed	0	#NULL!	0	Respiratory System	4	0	1	0	0	0	0	0	71.3	2	43.5	#NULL!	8.43	6.6	78.2	139	2	2	4.45	2	38.8	1.2	243	2	0.2	8.1	4.85	1.22	1.36	0	17.2	18
1	3229	2022-06-03 09:59:45	2	0	30.7479	76	3	female	2	1.42	62	No	Married	1	#NULL!	0	Respiratory System	4	0	0	0	0	0	0	0	44.9	1	28.9	#NULL!	4.65	3.46	74.3	132	2	2	3.99	1	39.8	0.54	151	2	0.13	8.6	4.09	1.61	0.64	1	8.9	28
1	3101	2022-06-03 10:48:27	1	1	19.9219	68	1	male	1	1.6	51	No	Married	1	#NULL!	0	Respiratory System	0	1	0	0	0	0	0	0	57.7	1	34.5	#NULL!	6.67	4.54	68.1	123	2	1	4.08	2	36.4	1.44	252	2	0.23	9.1	#NULL!	#NULL!	#NULL!	#NULL!	4.4	19
1	3142	2022-06-04 09:23:42	1	0	20.9366	75	2	male	1	1.65	57	No	Married	1	#NULL!	0	Digestive System	4	0	0	0	0	0	0	0	61.4	1	30	#NULL!	15.26	13.42	88	122	2	2	3.92	1	36.4	0.88	221	2	0.24	11	#NULL!	#NULL!	#NULL!	#NULL!	29	50
1	3309	2022-06-04 10:48:15	1	0	24	71	2	female	2	1.5	54	No	Married	1	#NULL!	0	Reproductive System	4	0	1	0	0	0	0	0	62.2	1	38	#NULL!	6	4.68	78	112	1	2	3.78	1	34.7	0.96	156	2	0.16	10.4	#NULL!	#NULL!	#NULL!	#NULL!	6.8	13
1	3255	2022-06-05 09:42:28	1	1	18.3655	70	1	male	1	1.65	50	No	Married	1	#NULL!	0	Respiratory System	4	1	0	0	0	0	0	0	76.3	2	41	#NULL!	7.04	4.97	70.4	153	2	2	4.81	2	46.8	1.34	296	2	0.27	9	4.79	0.87	1.84	0	15.1	8
1	3284	2022-06-06 10:46:31	1	0	31.1111	66	1	female	2	1.5	70	No	Married	1	#NULL!	0	Reproductive System	4	1	0	0	0	0	0	0	80.3	2	43.8	#NULL!	3.78	2.28	60.3	128	2	1	5.03	2	37.6	1.25	220	2	0.19	8.4	6.2	3.34	1.21	#NULL!	9.7	20
1	3184	2022-06-07 09:01:56	1	1	19.8189	66	1	female	2	1.49	44	No	Unmarried	#NULL!	#NULL!	0	Digestive System	0	0	0	0	0	0	0	0	59.2	1	38.7	#NULL!	3.9	2.54	65.1	48	1	1	2.24	1	16	1	214	2	0.18	8.5	3.63	0.72	#NULL!	0	4.4	11
1	3113	2022-06-07 09:45:22	1	1	18.3655	84	4	male	1	1.65	50	No	Married	1	#NULL!	0	Respiratory System	4	0	0	0	1	0	0	1	57	1	22.1	#NULL!	7.51	4.09	54.4	127	2	2	4.42	2	37.1	1.26	297	2	0.34	11.3	4.23	1.29	1.38	0	10.8	19
1	3097	2022-06-07 09:53:41	2	1	20.5714	65	1	male	1	1.75	63	No	Married	1	#NULL!	0	Digestive System	0	0	0	0	0	1	0	0	62.7	1	33.8	#NULL!	6.79	5.85	86.1	129	2	2	4.42	2	37.4	0.46	126	2	0.12	9.8	3.61	1.34	0.6	1	18.2	14
1	3251	2022-06-07 09:59:00	1	1	20.0288	66	1	female	2	1.58	50	No	Widowed	0	#NULL!	0	Digestive System	4	0	0	0	0	1	0	0	57.3	1	30.7	#NULL!	9.65	8.52	88.3	93	1	2	3.26	1	28	0.36	239	2	0.21	8.8	#NULL!	#NULL!	#NULL!	#NULL!	7.6	13
1	3233	2022-06-08 09:36:01	1	0	22.8928	74	2	female	2	1.55	55	No	Married	1	#NULL!	0	Reproductive System	0	0	0	1	1	0	0	0	85	2	45.6	#NULL!	8.93	5.29	59.2	155	2	1	5.09	2	45.5	3.18	338	3	0.29	8.7	#NULL!	#NULL!	#NULL!	#NULL!	11.2	18
1	3298	2022-06-08 10:26:11	1	0	21.7865	77	3	female	2	1.53	51	No	Married	1	#NULL!	0	Digestive System	0	1	1	1	0	1	0	0	67.5	1	36.8	#NULL!	1036.6	4.34	70	122	2	1	28.8	2	36.8	1.36	333	3	0.28	8.5	#NULL!	#NULL!	#NULL!	#NULL!	10.4	11
1	3120	2022-06-08 10:28:55	2	1	17.301	73	2	male	1	1.7	50	No	Widowed	1	#NULL!	0	Respiratory System	4	0	0	0	0	0	0	0	57.5	1	18.3	#NULL!	9.74	7.54	77.4	87	1	2	3.31	1	27.1	1.3	341	3	0.25	7.4	1.91	0.46	0.41	1	6	12
1	3292	2022-06-09 09:05:23	1	1	17.7778	80	3	female	2	1.5	40	No	Widowed	0	#NULL!	0	Digestive System	0	0	0	0	0	0	0	0	62.8	1	38.5	142	6.24	3.8	61	122	2	1	4.03	2	36.2	1.98	300	2	0.24	7.9	3.8	0.8	1.3	0	7	21
1	3254	2022-06-09 09:25:03	2	0	23.0469	76	3	male	1	1.6	59	No	Married	1	#NULL!	0	Other	0	0	0	0	0	0	0	0	63.7	1	36.8	#NULL!	0	5.2	57.5	150	2	1	0	2	44.5	2.62	179	2	0.18	10.2	4.89	1.02	1.21	0	8.7	23
1	3158	2022-06-09 10:06:01	1	1	18.75	70	1	male	1	1.6	48	No	Married	1	#NULL!	0	Respiratory System	4	0	0	0	0	0	0	0	56	1	27.3	#NULL!	9.6	6.61	68.9	135	2	1	4.6	2	40.2	2.42	328	3	0.3	9.1	2.98	0.59	0.97	1	8.2	9
1	3295	2022-06-09 11:58:47	1	1	#NULL!	81	4	female	2	1.63	#NULL!	Yes	Married	1	#NULL!	0	Respiratory System	0	0	1	1	0	0	0	1	53.8	1	29.9	#NULL!	5.38	4.39	81.7	152	2	2	5.07	2	46.7	0.66	149	2	0.15	10.1	3.68	1.73	0.9	1	12.9	33
1	3318	2022-06-09 12:10:47	1	1	15.6225	77	3	female	2	1.58	39	No	Married	1	#NULL!	0	Blood System	4	0	0	0	0	1	0	0	53.8	1	27.5	#NULL!	24.2	17.65	96.7	145	2	2	62	2	42.4	0.32	505	3	0.44	8.7	#NULL!	#NULL!	#NULL!	#NULL!	17.2	7
1	3121	2022-06-10 09:17:51	2	0	21.004	81	4	female	2	1.38	40	No	Married	1	#NULL!	0	Reproductive System	4	0	0	0	0	1	0	0	64.2	1	36.5	#NULL!	5.32	3.06	57.5	129	2	1	4.56	2	38.6	1.89	135	2	0.12	10.8	#NULL!	#NULL!	#NULL!	#NULL!	7.8	15
1	3281	2022-06-10 11:34:39	1	1	19.5312	67	1	male	1	1.6	50	No	Married	1	#NULL!	0	Respiratory System	0	0	0	0	0	0	0	0	58	1	32.8	#NULL!	6.41	5.01	78.1	95	1	2	3.46	1	28.4	0.95	239	2	0.18	7.4	4.74	0.99	1.21	0	17.1	18
1	3401	2022-06-11 09:53:25	2	0	22.6562	79	3	female	2	1.6	58	No	Married	1	#NULL!	0	Digestive System	0	0	1	1	1	0	0	0	66.3	1	35.5	#NULL!	9.07	5.41	59.6	128	2	1	4.41	2	38.5	3.07	285	2	0.29	10.1	3.6	1.08	0.89	1	14.6	14
1	3294	2022-06-11 10:08:21	1	0	26.5239	84	4	female	2	1.44	55	No	Married	1	#NULL!	0	Digestive System	0	0	0	0	0	0	0	0	56.8	1	30.6	#NULL!	11.21	9.68	86.4	119	1	2	4.22	2	35.2	0.73	296	2	0.3	10.2	4.69	1.84	1.06	1	9.7	10
1	3315	2022-06-11 10:33:17	1	0	24.4444	69	1	female	2	1.5	55	No	Married	1	#NULL!	0	Respiratory System	0	0	1	0	0	0	0	0	72.4	2	44.7	#NULL!	5.67	4.01	70.7	121	2	2	3.75	1	35.8	1.11	208	2	0.19	9	5.95	1.19	1.99	#NULL!	7.5	15
1	3275	2022-06-11 12:16:32	1	1	19.5918	77	3	male	1	1.75	60	No	Married	1	#NULL!	0	Urinary System	0	0	0	0	0	0	0	0	54.7	1	31.4	#NULL!	194.5	2.27	59.5	43	1	1	78172.1	2	16.1	1.1	229	2	0.18	7.7	#NULL!	#NULL!	#NULL!	#NULL!	3.7	11
1	3342	2022-06-12 09:15:32	1	0	24.064	74	2	female	2	1.47	52	No	Married	1	#NULL!	0	Digestive System	4	0	1	0	0	0	0	0	71.9	2	36	#NULL!	4.46	2.69	60.6	133	2	1	4.47	2	39.9	1.16	357	3	0.33	9.3	#NULL!	#NULL!	#NULL!	#NULL!	12.3	10
1	3290	2022-06-12 09:42:29	1	0	21.6041	83	4	male	1	1.61	56	No	Married	1	#NULL!	0	Respiratory System	0	0	0	0	0	0	0	0	69.4	2	38.7	#NULL!	5.64	2.47	43.7	148	2	1	4.68	2	43	1.65	135	2	0.14	10.6	5.13	1.08	1.31	0	14.7	14
1	3325	2022-06-12 09:55:08	2	0	20.898	65	1	male	1	1.75	64	No	Married	1	#NULL!	0	Respiratory System	0	0	0	0	0	0	0	0	75.2	2	48.9	#NULL!	6.9	4.94	71.4	149	2	2	4.85	2	44	1	220	2	0.22	10.1	5.78	0.71	1.51	#NULL!	11.3	16
1	3424	2022-06-13 09:29:14	1	1	424.617	83	4	female	2	0.61	158	No	Married	1	#NULL!	0	Digestive System	4	0	1	0	0	0	0	0	74.6	2	40.4	#NULL!	7.02	5.17	73.7	99	1	2	3.35	1	30.4	1.35	284	2	0.25	9	7.2	2.15	1.16	#NULL!	6.9	10
1	3391	2022-06-13 14:44:17	1	0	24.0238	79	3	male	1	1.67	67	No	Other	3	#NULL!	0	Respiratory System	0	1	0	0	1	0	0	0	62.8	1	34.5	#NULL!	4.31	2.66	61.7	126	2	1	4	1	37.6	0.95	314	3	0.26	8.4	3.74	0.84	0.99	1	7	14
1	3265	2022-06-14 08:50:10	1	0	21.7193	68	1	female	2	1.62	57	No	Married	1	#NULL!	0	Endocrine System	0	0	1	1	0	0	0	1	60.6	1	40.5	#NULL!	11.44	10.36	90.5	138	2	2	4.39	2	39.2	0.75	241	2	0.25	10.5	#NULL!	#NULL!	#NULL!	#NULL!	36.3	17
1	3341	2022-06-14 09:17:29	2	0	23.1405	69	1	male	1	1.65	63	No	Married	1	#NULL!	0	Reproductive System	0	0	1	1	1	0	0	0	67.8	1	42.6	#NULL!	2.9	7.36	75.8	148	2	2	7.3	2	43.5	1.66	342	3	0.34	9.9	5.58	2.6	1.38	#NULL!	7.8	23
1	3380	2022-06-14 10:04:35	1	1	17.6898	68	1	female	2	1.63	47	No	Married	1	#NULL!	0	Reproductive System	0	0	0	0	0	0	0	0	73.9	2	47.6	#NULL!	6.54	4.92	75.1	155	2	2	4.91	2	46.1	1.39	119	2	0.18	14.9	6.3	1.22	1.5	#NULL!	12.6	36
1	3389	2022-06-14 10:05:06	1	1	20.4152	73	2	male	1	1.7	59	No	Married	1	#NULL!	0	Digestive System	4	1	0	1	0	0	0	0	75.2	2	46.3	#NULL!	6.31	3.99	63.2	146	2	1	4.58	2	41.8	1.5	160	2	0.12	7.7	#NULL!	#NULL!	#NULL!	#NULL!	16.6	11
1	3417	2022-06-14 10:40:39	1	0	21.875	74	2	male	1	1.6	56	No	Married	1	#NULL!	0	Respiratory system	4	0	0	0	0	0	0	0	74.3	2	39.3	#NULL!	7.43	5.61	75.6	127	2	2	4.29	2	37.8	1.21	386	3	0.32	8.3	#NULL!	#NULL!	#NULL!	#NULL!	8	20
1	3376	2022-06-14 15:12:03	2	1	20.4518	74	2	female	2	1.45	43	No	Married	1	#NULL!	0	Reproductive System	4	0	0	0	0	0	0	1	62.1	1	24.9	149	6.09	5.03	82.5	123	2	2	3.84	1	37	0.76	307	3	0.26	8.4	5.76	1.82	1	#NULL!	6.1	10
1	3198	2022-06-15 09:49:52	1	1	23.8754	73	2	male	1	1.7	69	No	Other	3	#NULL!	0	Digestive System	0	0	0	1	0	0	0	0	53.7	1	33.1	136	7.6	5.86	76.9	138	2	2	4.46	2	39.2	1	233	2	0.19	7.9	3.43	0.87	0.92	1	8.4	15
1	3345	2022-06-15 10:38:59	1	0	24.5675	74	2	male	1	1.7	71	No	Married	1	#NULL!	0	Urinary System	0	0	0	0	0	1	0	0	62.6	1	33.4	#NULL!	2308.6	7.1	81.4	94	1	2	10652.1	2	28.1	1.01	190	2	0.17	8.9	#NULL!	#NULL!	#NULL!	#NULL!	2.8	13
1	3319	2022-06-15 11:00:32	1	0	23.1834	68	1	male	1	1.7	67	No	Married	1	#NULL!	0	Reproductive System	4	0	1	0	0	1	0	0	65.7	1	37.9	#NULL!	530.3	10.08	83.1	114	1	2	2940.7	2	33.6	1.37	245	2	0.26	10.6	#NULL!	#NULL!	#NULL!	#NULL!	21.3	17
1	3321	2022-06-15 11:01:00	1	0	21.3593	78	3	female	2	1.53	50	No	Married	1	#NULL!	0	Digestive System	0	0	0	0	0	0	0	0	65.5	1	32.7	#NULL!	10.72	8.55	79.8	69	1	2	3.1	1	23.2	1.52	635	3	0.49	7.7	#NULL!	#NULL!	#NULL!	#NULL!	5.6	9
1	3299	2022-06-16 09:36:55	2	1	20.1733	82	4	male	1	1.59	51	No	Married	1	#NULL!	0	Reproductive System	0	0	0	1	1	0	0	0	66.9	1	41	#NULL!	5.4	3.48	64.4	125	2	1	4.1	2	36.6	1.46	300	2	0.28	9.5	4.28	1.7	0.92	1	7.6	37
1	3124	2022-06-16 12:13:51	1	0	24.977	71	2	male	1	1.65	68	No	Married	1	#NULL!	0	Respiratory System	4	0	0	0	0	0	0	0	70	2	39.8	#NULL!	7.58	3.48	45.9	148	2	1	5.01	2	43.6	3.22	256	2	0.25	9.6	4.05	1.07	0.95	1	13.4	39
1	3379	2022-06-17 08:20:00	1	0	26.1752	67	1	male	1	1.67	73	No	Married	1	#NULL!	0	Respiratory System	0	0	0	0	1	0	0	0	69.9	2	39.6	#NULL!	5.62	3.79	67.6	163	2	1	5.66	2	47.4	1.34	177	2	0.17	9.8	#NULL!	#NULL!	#NULL!	#NULL!	18.6	19
1	3262	2022-06-17 08:58:21	1	1	17.7154	70	1	male	1	1.68	50	No	Married	1	#NULL!	0	Respiratory system	0	0	0	0	0	0	0	1	70.5	2	29.5	#NULL!	15.13	12.25	80.9	80	1	2	2.56	1	24.3	1.69	339	3	0.28	8.3	4.77	1.22	0.82	1	3.6	18
1	3405	2022-06-17 09:52:21	1	0	22.4059	76	3	male	1	1.65	61	No	Married	1	#NULL!	0	Reproductive System	0	0	1	0	0	0	0	0	73.6	2	41.4	#NULL!	13.8	9.78	77	178	2	2	1293.7	2	53.2	1.52	188	2	0.21	11.2	#NULL!	#NULL!	#NULL!	#NULL!	17	12
1	3410	2022-06-19 08:42:40	2	1	19.487	74	2	male	1	1.68	55	No	Married	1	#NULL!	0	Digestive System	0	0	0	0	0	0	0	0	68	1	40	#NULL!	5.17	3.67	71	139	2	2	4.23	2	40.8	1.07	160	2	0.15	9.1	4.29	2.82	0.96	1	21.2	9
1	3412	2022-06-19 09:02:50	1	1	19.7133	77	3	male	1	1.73	59	No	Married	1	#NULL!	0	Respiratory System	4	0	0	0	0	0	0	0	73.2	2	35.8	#NULL!	4.67	2.58	55.1	139	2	1	5.09	2	42.5	1.44	225	2	0.18	8.2	#NULL!	#NULL!	#NULL!	#NULL!	5.1	15
1	3358	2022-06-19 09:10:17	1	0	21.6441	66	1	female	2	1.55	52	No	Widowed	0	#NULL!	0	Digestive System	4	1	0	0	0	1	0	0	69.9	2	38.7	#NULL!	7.24	5.29	73.2	104	1	2	3.7	1	33	1.61	347	3	0.31	8.9	#NULL!	#NULL!	#NULL!	#NULL!	3.3	18
1	3271	2022-06-20 10:15:03	2	0	25.7778	82	4	female	2	1.5	58	No	Widowed	0	#NULL!	0	Digestive System	0	0	1	1	0	0	0	0	58.8	1	28.3	#NULL!	15.59	14.24	91.3	116	1	2	3.88	1	34.7	0.98	121	2	0.15	12.7	3.34	1.23	0.7	1	24.9	12
1	3407	2022-06-21 08:26:18	1	0	23.8754	72	2	male	1	1.7	69	No	Married	1	#NULL!	0	Endocrine System	0	0	1	1	0	0	0	0	71	2	42.2	229	5.21	2.76	53	154	2	1	5.01	2	43	2.07	180	2	0.17	9.3	5.99	2.78	0.75	#NULL!	5.6	30
1	3311	2022-06-21 09:28:49	1	0	20.7967	67	1	male	1	1.67	58	No	Married	1	#NULL!	0	Digestive System	0	1	0	1	0	0	0	0	63.3	1	37.1	#NULL!	3	4.21	82.1	124	2	2	0	1	36.5	0.62	111	2	0.1	9.2	4.23	1.38	1.06	1	22.4	12
1	3390	2022-06-21 09:46:48	1	0	22.9591	70	1	male	1	1.63	61	No	Unmarried	#NULL!	#NULL!	0	Digestive System	4	0	0	0	0	0	0	1	71.3	2	38	#NULL!	11.26	8.32	73.8	135	2	2	4.71	2	39.9	2.07	197	2	0.19	9.5	#NULL!	#NULL!	#NULL!	#NULL!	19.5	20
1	3324	2022-06-21 10:54:36	1	0	21.4903	73	2	female	2	1.51	49	No	Married	1	#NULL!	0	Digestive System	0	1	1	0	0	0	0	0	64.3	1	34.1	#NULL!	3.26	1.47	45	117	1	1	3.35	1	35.1	1.16	55	1	0.06	11	#NULL!	#NULL!	#NULL!	#NULL!	10.2	15
1	3330	2022-06-22 08:47:55	2	1	17.1875	81	4	male	1	1.6	44	No	Married	1	#NULL!	0	Digestive System	0	0	0	0	0	0	0	0	57.6	1	34.4	#NULL!	4.86	3.84	79.2	129	2	2	4.22	2	37.5	0.45	171	2	0.16	9.2	4.47	0.92	1.17	0	15.7	12
1	3357	2022-06-22 08:56:33	2	1	16.9563	72	2	female	2	1.62	44.5	No	Widowed	0	#NULL!	0	Digestive System	0	0	0	1	0	1	0	1	71.9	2	34.7	#NULL!	3.49	2.6	74.8	118	1	2	3.72	1	35.1	0.65	167	2	0.15	9	4.31	1.11	0.95	1	14.7	44
1	3372	2022-06-22 10:15:29	1	0	20.9366	75	2	male	1	1.65	57	No	Married	1	#NULL!	0	Digestive System	4	0	0	0	0	0	0	0	51.6	1	28.5	#NULL!	6.34	4.47	70.6	102	1	2	3.5	1	31.3	1.3	272	2	0.28	10.2	#NULL!	#NULL!	#NULL!	#NULL!	6.9	53
1	3519	2022-06-23 08:51:42	1	0	24.6548	70	1	male	1	1.56	60	No	Married	1	#NULL!	0	Digestive System	0	0	0	0	0	0	0	0	73.9	2	47.9	243	6.14	3.13	51	163	2	1	5.05	2	47.6	1.41	115	2	0.17	14.6	4.48	0.62	1.37	0	14	31
1	3354	2022-06-23 09:28:00	1	1	20.1733	75	2	male	1	1.59	51	No	Married	1	#NULL!	0	Digestive System	4	0	0	1	0	0	0	1	50.4	1	27.6	#NULL!	2.64	1.64	62.1	116	1	1	3.49	1	32	0.52	56	1	0.06	11.8	#NULL!	#NULL!	#NULL!	#NULL!	26.3	28
1	3340	2022-06-23 09:36:26	1	0	22.0317	70	1	female	2	1.58	55	No	Married	1	#NULL!	0	Reproductive System	0	1	0	0	0	0	0	0	82.5	2	40.1	#NULL!	3.97	2.38	60.1	134	2	1	4.27	2	39.8	1	210	2	0.23	10.8	#NULL!	#NULL!	#NULL!	#NULL!	12.8	26
1	3365	2022-06-23 11:11:42	2	0	29.7578	68	1	male	1	1.7	86	No	Other	3	#NULL!	0	Reproductive system	4	0	1	0	0	0	0	0	72.4	2	45.1	#NULL!	11.43	6.47	56.6	171	2	1	5.49	2	48	4.06	238	2	0.23	9.6	#NULL!	#NULL!	#NULL!	#NULL!	10.9	21
1	3273	2022-06-23 15:01:56	1	0	21.6441	76	3	female	2	1.55	52	No	Married	1	#NULL!	0	Respiratory system	0	0	0	0	0	0	0	0	74.4	2	41.3	#NULL!	7.11	4.87	68.5	150	2	1	4.73	2	44.1	1.68	189	2	0.2	10.6	5.62	0.74	1.69	#NULL!	15.3	52
1	3308	2022-06-24 09:45:42	2	0	26.2227	72	2	male	1	1.55	63	No	Married	1	#NULL!	0	Digestive System	0	0	1	1	1	1	0	0	60.6	1	32.1	#NULL!	10.64	8.51	79.9	157	2	2	5.2	2	45	1.17	357	3	0.34	9.5	#NULL!	#NULL!	#NULL!	#NULL!	112	289
1	3394	2022-06-24 10:33:45	1	1	20.1995	70	1	male	1	1.78	64	No	Married	1	#NULL!	0	Respiratory System	4	0	1	1	0	0	0	1	60.6	1	32.6	#NULL!	7.74	5.53	71.5	124	2	2	4.16	2	38.4	1.57	294	2	0.24	8.3	5.21	1.45	0.99	#NULL!	5.4	6
1	3359	2022-06-24 10:55:33	1	0	23.8054	78	3	female	2	1.52	55	No	Married	1	#NULL!	0	Respiratory System	0	1	1	0	0	0	0	0	59.9	1	33.5	#NULL!	3.65	1.42	38.8	135	2	1	4.36	2	41	1.72	152	2	0.14	9	4.42	1.34	1.26	0	8.5	10
1	3457	2022-06-24 11:16:08	1	0	27.6817	75	2	male	1	1.7	80	No	Other	3	#NULL!	0	Respiratory System	4	0	1	0	0	0	0	0	68.9	2	38.5	#NULL!	9.46	6.76	71.5	152	2	2	4.57	2	44.1	2.01	273	2	0.23	8.5	#NULL!	#NULL!	#NULL!	#NULL!	7.8	14
1	3387	2022-06-26 10:22:24	1	0	24.2604	79	3	female	2	1.3	41	No	Widowed	0	#NULL!	1	Digestive System	0	0	0	0	0	0	0	0	64.2	1	32.2	#NULL!	5.35	3.23	60.5	89	1	1	3.19	1	26.8	1.76	210	2	0.18	8.6	#NULL!	#NULL!	#NULL!	#NULL!	70.2	46
1	3520	2022-06-26 10:55:07	1	0	24.1965	74	2	female	2	1.48	53	No	Married	1	#NULL!	0	Digestive System	4	0	1	0	0	0	0	0	71.6	2	37	#NULL!	3.86	1.69	43.9	130	2	1	4.43	2	40	1.58	236	2	0.23	9.8	#NULL!	#NULL!	#NULL!	#NULL!	7.8	13
1	3437	2022-06-27 08:14:59	1	0	21.4844	68	1	female	2	1.6	55	No	Other	3	#NULL!	0	Digestive System	0	1	1	0	0	0	0	0	78	2	39.5	#NULL!	5.87	3.8	64.8	127	2	1	4.22	2	37.4	1.45	213	2	0.21	9.7	5.05	1.25	1.06	1	18.1	20
1	3446	2022-06-27 09:05:27	1	0	20.8117	65	1	female	2	1.55	50	No	Married	1	#NULL!	0	Respiratory System	0	0	1	0	0	0	0	0	73.7	2	43.8	#NULL!	0	3.03	57.5	136	2	1	0	2	39.5	1.94	156	2	0.21	13.2	5.83	1.92	1.45	#NULL!	11.3	18
1	3333	2022-06-27 09:43:36	1	0	25.2994	69	1	female	2	1.54	60	No	Other	3	#NULL!	0	Respiratory System	4	0	1	0	0	0	0	0	61.1	1	37.6	#NULL!	6.53	4	61.3	134	2	1	3.95	1	38.4	1.64	267	2	0.24	9.1	#NULL!	#NULL!	#NULL!	#NULL!	7.8	25
1	3426	2022-06-27 10:11:42	1	0	22.1893	75	2	female	2	1.56	54	No	Married	1	#NULL!	0	Urinary System	0	0	1	0	0	0	0	0	73.2	2	41.4	#NULL!	5.31	3.34	62.9	120	1	1	3.83	1	36.4	1.6	141	2	0.21	14.9	#NULL!	#NULL!	#NULL!	#NULL!	7.6	14
1	3378	2022-06-29 08:25:40	2	0	22.4913	71	2	male	1	1.7	65	No	Married	1	#NULL!	0	Urinary System	0	0	1	1	0	0	0	0	71.8	2	37.6	#NULL!	238.4	4.96	82	120	1	2	34.6	2	35.9	0.7	304	3	0.25	8.1	4.02	1.8	0.75	1	5.4	91
1	3327	2022-06-29 09:27:56	2	0	32.3939	66	1	female	2	1.47	70	No	Married	1	#NULL!	0	Reproductive System	4	0	0	0	0	0	0	0	78.3	2	43.3	#NULL!	4.9	2.83	59.7	132	2	1	84.6	2	39.5	1.5	313	3	0.28	8.8	#NULL!	#NULL!	#NULL!	#NULL!	10.3	23
1	3443	2022-06-29 09:43:50	1	0	22.2137	65	1	female	2	1.53	52	No	Married	1	#NULL!	0	Reproductive System	4	0	0	1	0	0	0	0	78.4	2	45.4	192	11.5	2.12	51.4	162	2	1	0	2	47	1.7	141	2	0.15	10.7	7.1	1.78	2.16	#NULL!	17.3	125
1	3373	2022-06-30 08:23:49	2	0	24.1672	85	4	female	2	1.64	65	No	Widowed	0	#NULL!	0	Reproductive System	0	0	1	1	0	1	0	0	66.3	1	36.9	#NULL!	4.77	2.37	49.7	131	2	1	4.28	2	39.2	1.86	275	2	0.27	10	5.16	3.13	1.12	1	15	12
1	3507	2022-06-30 08:58:29	1	1	18.3594	66	1	male	1	1.6	47	No	Married	1	#NULL!	0	Respiratory System	4	0	0	0	0	0	0	0	71.7	2	37.5	#NULL!	7.5	4.55	60.5	131	2	1	4.5	2	39.3	2.37	247	2	0.24	9.8	4.82	0.75	1.53	0	6.4	20
1	3475	2022-06-30 09:22:26	2	0	24.7676	70	1	male	1	1.62	65	No	Married	1	#NULL!	0	Reproductive System	0	0	0	0	0	0	0	0	69.8	2	39.8	#NULL!	4.4	4.1	56.5	135	2	1	114.1	2	40.7	2.22	285	2	0.25	8.7	5	1.78	1.01	1	8.6	24
1	3503	2022-06-30 09:32:08	1	0	21.875	65	1	male	1	1.6	56	No	Married	1	#NULL!	0	Reproductive System	4	0	0	0	0	0	0	0	72.4	2	41.8	#NULL!	6.13	2.95	48.1	149	2	1	4.62	2	42.3	2.39	220	2	0.24	10.9	5.47	1.56	1.15	#NULL!	19.2	22
1	3413	2022-06-30 10:56:50	2	0	24.0346	82	4	female	2	1.58	60	No	Married	1	#NULL!	0	Urinary System	0	0	1	0	1	1	0	0	74.6	2	43.2	#NULL!	2.9	5.56	73.2	146	2	2	953.9	2	42.5	1.5	302	3	0.28	9.2	#NULL!	#NULL!	#NULL!	#NULL!	12.6	17
1	3518	2022-06-30 15:48:19	1	0	21.7993	66	1	male	1	1.7	63	No	Married	1	#NULL!	0	Respiratory System	4	0	0	0	0	0	0	0	63.9	1	40.1	#NULL!	4.21	2.73	64.8	133	2	1	4.27	2	39.4	1.06	99	1	0.12	12.2	5.07	0.84	1.61	0	8.7	15
1	3513	2022-07-01 09:31:49	2	0	22.8928	69	1	female	2	1.55	55	No	Married	1	#NULL!	0	Digestive System	4	0	0	0	0	0	0	0	58.5	1	34.8	#NULL!	10.07	8.7	86.4	118	1	2	4.06	2	35.8	0.67	158	2	0.17	10.6	#NULL!	#NULL!	#NULL!	#NULL!	10.8	43
1	3517	2022-07-01 09:49:55	1	0	23.2335	83	4	female	2	1.58	58	No	Widowed	0	#NULL!	1	Digestive System	4	0	1	0	0	0	0	0	57.7	1	32.4	#NULL!	8.53	7.21	84.5	107	1	2	3.56	1	31.7	1.05	142	2	0.13	9.1	#NULL!	#NULL!	#NULL!	#NULL!	2.8	27
1	3335	2022-07-01 14:20:06	1	0	30.2519	76	3	female	2	1.42	61	No	Married	1	#NULL!	0	Respiratory System	4	0	0	0	0	0	0	0	54.3	1	39.1	#NULL!	5.55	4.25	76.5	126	2	2	3.77	1	37	0.59	144	2	0.13	9.3	3.36	1.52	0.56	1	10.6	17
1	3499	2022-07-02 08:42:17	1	1	17.9592	82	4	male	1	1.75	55	No	Married	1	#NULL!	0	Digestive System	0	0	0	1	0	0	0	0	68.6	2	43	#NULL!	4.34	2.08	47.8	152	2	1	4.74	2	44.1	1.75	173	2	0.15	8.7	4.54	0.82	1.44	0	7.4	20
1	3524	2022-07-02 10:18:27	2	0	21.5019	65	1	female	2	1.57	53	No	Married	1	#NULL!	0	Reproductive System	4	0	0	0	0	0	0	1	72.6	2	36.7	#NULL!	5.68	4.02	70.8	118	1	2	3.62	1	34	0.91	221	2	0.21	9.5	#NULL!	#NULL!	#NULL!	#NULL!	6.6	13
1	3428	2022-07-03 09:47:22	1	1	14.4531	73	2	female	2	1.6	37	No	Married	1	#NULL!	0	Digestive System	4	0	0	0	0	0	0	0	60.8	1	31.7	#NULL!	7.4	6.75	91.3	85	1	2	3.14	1	27.1	0.42	288	2	0.3	10.4	#NULL!	#NULL!	#NULL!	#NULL!	19.2	9
1	3477	2022-07-04 09:20:07	2	1	18.6709	83	4	male	1	1.62	49	No	Married	1	#NULL!	0	Digestive System	4	0	0	0	0	0	0	0	56.9	1	29.7	#NULL!	3.82	3.11	81.3	100	1	2	3.2	1	28.8	0.47	142	2	0.14	9.5	9.85	2.1	0.78	#NULL!	25.3	38
1	3521	2022-07-04 10:27:07	2	0	26.4463	80	3	male	1	1.65	72	No	Married	1	#NULL!	0	Reproductive System	0	0	1	1	1	1	0	0	68.1	2	38.1	#NULL!	5.81	4.22	72.8	138	2	2	4.6	2	41.2	0.92	143	2	0.14	9.6	#NULL!	#NULL!	#NULL!	#NULL!	10.7	41
1	3492	2022-07-04 11:13:00	1	1	20.2694	66	1	female	2	1.49	45	No	Unmarried	#NULL!	#NULL!	0	Digestive System	0	1	0	0	0	0	0	0	65.8	1	41.5	#NULL!	4.52	3.33	73.7	96	1	2	3.27	1	29.3	0.93	216	2	0.18	8.2	5.09	1.07	1.93	0	7	18
1	3487	2022-07-05 08:37:09	1	0	22.6003	72	2	female	2	1.56	55	No	Married	1	#NULL!	0	Digestive System	0	0	0	0	0	0	0	0	72.5	2	37.5	#NULL!	5.07	3.12	61.7	122	2	1	4.33	2	36.5	1.41	232	2	0.23	9.7	3.79	1.21	1.06	1	4.5	29
1	3508	2022-07-05 09:08:08	1	0	22.231	67	1	male	1	1.67	62	No	Married	1	#NULL!	0	Respiratory System	0	0	0	0	0	0	0	1	63.2	1	37.7	#NULL!	3.41	2.91	85.7	133	2	2	4.46	2	40.8	0.29	105	2	0.12	11.1	#NULL!	#NULL!	#NULL!	#NULL!	9.6	14
1	3450	2022-07-05 09:24:39	1	0	26.8386	67	1	female	2	1.58	67	No	Married	1	#NULL!	0	Digestive System	0	0	0	0	0	0	0	0	75.2	2	44.5	#NULL!	5.01	2.99	59.7	145	2	1	4.62	2	42	1.64	154	2	0.18	11.9	5.21	1.82	1.49	#NULL!	13.6	58
1	3445	2022-07-05 09:30:52	1	1	20.2812	76	3	male	1	1.72	60	No	Married	1	#NULL!	0	Urinary System	4	0	1	0	0	0	0	1	74.7	2	35	#NULL!	7.49	5.42	72.2	119	1	2	3.86	1	34.7	1.34	334	3	0.28	8.3	#NULL!	#NULL!	#NULL!	#NULL!	8.8	19
1	3479	2022-07-05 09:32:25	1	0	24.8016	71	2	male	1	1.68	70	No	Married	1	#NULL!	0	Respiratory System	0	0	0	0	0	0	0	1	76.1	2	45	#NULL!	13	11.13	85.5	155	2	2	5.84	2	45.9	0.78	210	2	0.23	11	#NULL!	#NULL!	#NULL!	#NULL!	26.8	29
1	3502	2022-07-05 10:24:23	1	0	23.4375	70	1	female	2	1.6	60	No	Married	1	#NULL!	0	Digestive System	4	0	0	0	0	0	0	1	64.4	1	21.5	#NULL!	10.8	8.51	78.8	112	1	2	3.79	1	35	1.3	246	2	0.26	10.6	#NULL!	#NULL!	#NULL!	#NULL!	13.7	25
1	3565	2022-07-05 14:38:16	1	0	24.2424	71	2	male	1	1.65	66	No	Married	1	#NULL!	0	Respiratory System	4	0	0	0	0	0	0	0	64.8	1	31.5	#NULL!	6.2	2.54	48.9	128	2	1	4.6	2	37.8	1.68	80	1	0.09	11.6	#NULL!	#NULL!	#NULL!	#NULL!	9.5	41
1	3540	2022-07-05 14:49:29	1	0	23.3726	65	1	female	2	1.52	54	No	Other	3	#NULL!	0	Respiratory System	0	0	0	0	0	0	0	0	73.4	2	46.9	#NULL!	5.04	3.28	64.8	155	2	1	4.89	2	45.7	1.48	244	2	0.25	10.2	4.75	1.59	1.25	0	16.1	17
1	3516	2022-07-06 10:27:04	1	0	24.5578	73	2	female	2	1.55	59	No	Married	1	#NULL!	0	Reproductive System	0	0	1	1	0	0	0	0	70.4	2	38.9	#NULL!	2.2	2.28	52.3	147	2	1	2.2	1	42	1.65	160	2	0.2	12.5	#NULL!	#NULL!	#NULL!	#NULL!	12.1	47
1	3527	2022-07-06 11:37:58	1	0	25.763	75	2	male	1	1.74	78	No	Married	1	#NULL!	0	Reproductive System	0	0	0	1	0	1	0	0	70.6	2	45.7	#NULL!	77.1	4.4	64.3	177	2	1	4.3	2	52.2	1.81	170	2	0.18	10.4	#NULL!	#NULL!	#NULL!	#NULL!	16.3	74
1	3541	2022-07-06 14:26:11	1	0	23.8754	75	2	male	1	1.7	69	No	Married	1	#NULL!	0	Respiratory system	0	0	1	0	0	0	0	0	69.3	2	41.8	#NULL!	4.44	2.56	57.8	111	1	1	3.49	1	33	1.25	167	2	0.15	8.9	5.21	1.55	1.02	#NULL!	5.1	14
1	3530	2022-07-06 16:15:46	1	1	13.219	67	1	female	2	1.58	33	No	Married	1	#NULL!	0	Respiratory system	4	0	0	0	0	0	0	1	63.8	1	28	#NULL!	7.5	5.64	75.2	104	1	2	4.02	2	32.2	1.21	278	2	0.22	7.7	3.78	0.53	1.2	0	4.6	7
1	3653	2022-07-07 09:02:22	2	0	21.2183	83	4	male	1	1.61	55	No	Married	1	#NULL!	0	Respiratory system	0	0	0	0	0	0	0	0	71	2	41.2	#NULL!	5.67	3.57	62.9	151	2	1	4.69	2	44	1.36	126	2	0.15	12	5.32	1.17	1.52	#NULL!	12.1	22
1	3512	2022-07-07 09:46:44	1	1	#NULL!	75	2	female	2	1.6	#NULL!	Yes	Other	3	#NULL!	0	Respiratory System	4	0	0	0	0	0	0	1	71.5	2	32.9	#NULL!	12.54	11.15	89	140	2	2	5.06	2	43	0.82	240	2	0.21	8.9	#NULL!	#NULL!	#NULL!	#NULL!	12.9	11
1	3636	2022-07-07 10:12:25	1	0	20.7612	74	2	male	1	1.7	60	No	Married	1	#NULL!	0	Digestive System	4	1	0	1	0	0	0	0	73.5	2	43.7	#NULL!	4.55	2.49	54.6	146	2	1	4.46	2	41.6	1.49	148	2	0.12	7.7	#NULL!	#NULL!	#NULL!	#NULL!	21	21
1	3598	2022-07-07 10:28:26	1	0	21.2279	68	1	female	2	1.55	51	No	Married	1	#NULL!	0	Digestive System	0	1	1	0	0	0	0	0	77.1	2	41.5	#NULL!	5.79	3.56	61.5	105	1	1	4.34	2	34.7	1.89	202	2	0.28	13.7	#NULL!	#NULL!	#NULL!	#NULL!	13.3	21
1	3637	2022-07-08 07:54:48	1	1	15.5896	84	4	male	1	1.68	44	No	Married	1	#NULL!	0	Digestive System	4	0	0	0	0	0	0	0	65.2	1	29.3	#NULL!	6.14	4.3	70	120	1	2	3.92	1	34.9	1.22	223	2	0.18	7.8	#NULL!	#NULL!	#NULL!	#NULL!	9.2	10
1	3665	2022-07-08 08:59:55	2	0	24.093	80	3	male	1	1.68	68	No	Married	1	#NULL!	0	Blood System	4	0	1	0	0	0	0	0	63.1	1	40.7	#NULL!	2.3	3.62	29.9	117	1	1	3.4	1	35.8	6.12	155	2	0.16	10.4	3.15	0.88	0.6	1	15.8	24
1	3652	2022-07-08 09:01:53	1	0	25.5661	79	3	female	2	1.48	56	No	Married	1	#NULL!	0	Reproductive System	0	0	1	1	0	0	0	0	63.9	1	40	#NULL!	3.16	2.18	69.2	155	2	2	5	2	44.6	0.62	182	2	0.2	10.7	#NULL!	#NULL!	#NULL!	#NULL!	17.9	17
1	3460	2022-07-08 09:30:54	1	0	25.2595	79	3	male	1	1.7	73	No	Married	1	#NULL!	0	Reproductive System	0	0	1	1	0	0	0	0	56	1	34	#NULL!	5.41	4.32	79.9	116	1	2	3.51	1	34.2	0.51	197	2	0.18	9.2	3.79	0.42	1.56	0	8.5	20
1	3476	2022-07-08 12:18:25	1	0	23.4375	77	3	male	1	1.6	60	No	Married	1	#NULL!	0	Urinary System	0	0	0	0	0	1	0	0	70.7	2	38.7	#NULL!	330.4	3.7	55.7	158	2	1	133.4	2	46.9	2.17	158	2	0.16	9.9	#NULL!	#NULL!	#NULL!	#NULL!	24.3	22
1	3313	2022-07-08 23:20:19	1	1	18.026	76	3	female	2	1.58	45	No	Married	1	#NULL!	0	Digestive System	4	1	0	0	0	0	0	1	59.4	1	29.1	#NULL!	10.98	9.45	86.2	107	1	2	3.83	1	31.6	0.96	228	2	0.2	8.8	4.28	1.27	1.23	0	30.2	25
1	3489	2022-07-09 08:43:28	2	1	17.5056	68	1	male	1	1.74	53	No	Married	1	#NULL!	0	Respiratory System	0	0	1	0	0	0	0	0	66.8	1	36.6	#NULL!	3.9	2.41	64	85	1	2	13.7	2	25.7	0.56	245	2	0.25	10	3.77	1.44	1.06	1	4.4	19
1	3510	2022-07-09 09:25:52	2	0	21.0077	69	1	male	1	1.69	60	No	Married	1	#NULL!	0	Respiratory System	4	0	1	0	0	0	0	0	59	1	30.8	#NULL!	15.67	13.84	88.3	136	2	2	4.55	2	40.4	1.1	253	2	0.24	9.3	#NULL!	#NULL!	#NULL!	#NULL!	12	92
1	3433	2022-07-09 09:38:51	1	0	23.3556	74	2	male	1	1.78	74	No	Married	1	#NULL!	0	Digestive System	0	1	1	0	0	0	0	0	68.5	2	41.9	#NULL!	8.41	5.06	60.2	169	2	1	5.23	2	49.6	2.64	227	2	0.24	10.6	#NULL!	#NULL!	#NULL!	#NULL!	16.1	20
1	3558	2022-07-09 10:39:20	1	0	21.4536	83	4	male	1	1.63	57	No	Married	1	#NULL!	0	Urinary System	0	0	0	0	0	0	0	0	62.9	1	34.5	#NULL!	21.2	3.49	69.4	146	2	2	32.7	2	43	0.98	86	1	0.1	11	#NULL!	#NULL!	#NULL!	#NULL!	20.6	27
1	3597	2022-07-10 15:33:58	2	0	20.7612	77	3	male	1	1.7	60	No	Other	3	#NULL!	0	Respiratory System	4	0	0	0	0	0	0	0	72.7	2	39.5	#NULL!	5.66	3.8	67	157	2	1	5.39	2	46.8	1.28	213	2	0.2	9.2	#NULL!	#NULL!	#NULL!	#NULL!	10.3	26
1	3493	2022-07-11 08:47:12	1	1	21.2245	78	3	male	1	1.75	65	No	Other	3	#NULL!	0	Respiratory System	0	1	1	1	0	1	0	0	65	1	32.3	#NULL!	6.86	4.5	65.6	119	1	1	3.63	1	36.3	1.51	278	2	0.28	10	#NULL!	#NULL!	#NULL!	#NULL!	7.1	15
1	3469	2022-07-11 12:09:57	1	0	20.9366	73	2	male	1	1.65	57	No	Married	1	#NULL!	0	Respiratory System	4	0	0	0	0	0	0	0	68.7	2	34.3	#NULL!	1.3	3.27	61.3	117	1	1	3.8	1	35.2	1.42	191	2	0.19	9.6	4.49	1.04	1.44	0	6.5	23
1	3374	2022-07-11 19:04:21	1	0	23.0469	73	2	male	1	1.6	59	No	Married	1	#NULL!	0	Digestive System	0	1	1	0	0	1	0	0	59.5	1	37.7	170	6.25	3.37	54	155	2	1	4.65	2	45.1	1.84	247	2	0.25	10.2	4.19	1.24	1.54	0	10.2	13
1	3453	2022-07-13 08:16:00	1	0	24.977	68	1	female	2	1.65	68	No	Married	1	#NULL!	0	Urinary System	0	1	1	0	0	0	0	0	70.9	2	42.3	#NULL!	8.03	4.29	53.4	93	1	1	2.82	1	28.2	2.68	225	2	0.21	9.4	7.09	3.35	0.98	#NULL!	2.3	15
1	3583	2022-07-13 08:46:08	1	1	19.2234	71	2	female	2	1.53	45	No	Widowed	0	#NULL!	0	Respiratory System	0	0	0	0	0	0	0	0	60	1	35.9	#NULL!	5.1	2.74	53.7	116	1	1	3.84	1	35	1.81	234	2	0.2	8.5	3.7	0.93	1.12	1	6.6	13
1	3287	2022-07-13 08:58:14	1	1	20.0692	70	1	male	1	1.7	58	No	Married	1	#NULL!	0	Respiratory System	4	0	0	0	0	0	0	0	70.4	2	39.6	#NULL!	9.76	7.49	76.8	162	2	2	5.19	2	47	1.41	239	2	0.23	9.8	5.86	1.34	0.89	#NULL!	9.7	7
1	3579	2022-07-14 09:46:36	1	1	16.4354	74	2	female	2	1.48	36	No	Married	1	#NULL!	0	Reproductive System	0	0	0	0	0	0	0	1	57	1	22	#NULL!	7.81	6.55	83.8	128	2	2	3.97	1	36.9	0.86	231	2	0.21	8.9	#NULL!	#NULL!	#NULL!	#NULL!	6.1	20
1	3534	2022-07-14 10:08:03	2	0	497.257	78	3	female	2	0.54	145	No	Married	1	#NULL!	0	Urinary System	0	0	1	0	1	0	0	0	66	1	37.2	#NULL!	4.15	2.87	69.2	128	2	2	4.21	2	38.7	0.79	253	2	0.24	9.6	#NULL!	#NULL!	#NULL!	#NULL!	7.1	15
1	3610	2022-07-14 11:00:20	1	0	22.8329	72	2	male	1	1.58	57	No	Married	1	#NULL!	0	Digestive System	0	0	1	1	1	0	0	0	63.7	1	35.4	#NULL!	9.02	5.67	62.8	154	2	1	5.03	2	44.5	2.36	268	2	0.27	10	#NULL!	#NULL!	#NULL!	#NULL!	29.7	52
1	3620	2022-07-14 11:31:30	1	1	18.5911	78	3	male	1	1.72	55	No	Married	1	#NULL!	0	Respiratory System	0	0	0	0	0	0	0	0	63.8	1	37	#NULL!	4.23	2.74	64.8	128	2	1	4.5	2	39.9	1.08	136	2	0.18	13.5	#NULL!	#NULL!	#NULL!	#NULL!	9.6	19
1	3647	2022-07-15 08:38:24	2	1	17.3333	65	1	female	2	1.5	39	No	Married	1	#NULL!	0	Respiratory System	4	0	0	0	0	0	0	0	63.9	1	39.1	211	7.15	5.15	72.1	122	2	2	3.93	1	36	1.32	185	2	0.15	8	5.53	1.78	1.83	#NULL!	6.3	20
1	3619	2022-07-15 09:07:44	2	1	16.2982	82	4	male	1	1.68	46	No	Married	1	#NULL!	0	Digestive System	0	0	1	0	1	1	0	1	62.2	1	32.8	#NULL!	6.04	4.33	71.6	138	2	2	4.26	2	39	0.99	142	2	0.12	8.7	#NULL!	#NULL!	#NULL!	#NULL!	10.8	8
1	3635	2022-07-15 09:33:03	2	0	29.5525	72	2	female	2	1.55	71	No	Widowed	0	#NULL!	0	Respiratory System	0	0	1	0	1	0	0	0	72.7	2	44.7	#NULL!	5.16	3.4	65.9	146	2	1	4.82	2	43	1.38	190	2	0.22	11.6	3.11	1.18	1.13	1	10.8	15
1	3531	2022-07-15 10:09:25	1	0	24.2604	79	3	female	2	1.3	41	No	Widowed	0	#NULL!	1	Digestive System	0	0	0	0	0	0	0	0	66.9	1	32.6	#NULL!	6.04	3.57	59	91	1	1	3.45	1	27.8	1.99	213	2	0.19	8.8	4.45	1.18	0.7	1	45.7	56
1	3618	2022-07-15 10:14:18	1	0	24.974	70	1	male	1	1.55	60	No	Married	1	#NULL!	0	Digestive System	0	0	0	0	0	0	0	0	68.5	2	42.7	214	5.36	2.52	47.2	158	2	1	4.93	2	45.9	0.97	105	2	0.14	13.6	3.82	0.63	1.21	0	13.4	19
1	3639	2022-07-15 12:57:46	1	0	20.6131	71	2	female	2	1.51	47	No	Widowed	0	#NULL!	0	Respiratory System	0	0	1	0	0	0	0	0	75.3	2	43.7	#NULL!	6.77	4.43	65.3	134	2	1	4.34	2	39.8	1.76	236	2	0.27	11.3	5.67	1.95	1.52	#NULL!	10.3	13
1	3728	2022-07-16 08:19:35	1	0	23.8754	78	3	male	1	1.7	69	No	Other	3	#NULL!	0	Urinary System	0	0	0	1	0	0	0	0	67.6	1	43.3	#NULL!	7.41	5.99	80.9	157	2	2	5.16	2	46.3	1.01	185	2	0.18	10	5.01	1.58	0.9	1	16.5	12
1	3630	2022-07-16 12:57:56	1	0	25.7117	74	2	male	1	1.65	70	No	Married	1	#NULL!	0	Reproductive System	0	0	1	1	1	0	0	0	69.9	2	37.9	#NULL!	8.71	5.51	63.2	161	2	1	5.2	2	46.3	2.44	228	2	0.25	11.1	#NULL!	#NULL!	#NULL!	#NULL!	15.9	23
1	3640	2022-07-16 14:54:03	1	1	19.5312	68	1	male	1	1.6	50	No	Married	1	#NULL!	0	Other	0	0	1	0	0	0	0	0	69.2	2	39.7	#NULL!	5.87	3.63	61.7	149	2	1	4.84	2	43.5	1.76	181	2	0.21	11.5	5.85	1.76	1.17	#NULL!	11	48
1	3643	2022-07-17 08:41:56	2	0	24.1288	75	2	male	1	1.59	61	No	Other	3	#NULL!	0	Digestive System	4	0	0	1	0	0	0	1	50.1	1	25.4	#NULL!	2.66	1.81	68	113	1	2	3.3	1	31	0.44	43	1	#NULL!	#NULL!	#NULL!	#NULL!	#NULL!	#NULL!	31.3	29
1	3779	2022-07-18 08:48:15	1	0	31.4684	66	1	female	2	1.47	68	No	Married	1	#NULL!	0	Reproductive System	4	0	0	0	0	0	0	0	80.6	2	44	#NULL!	4.15	2.34	56.4	132	2	1	5.16	2	38.5	1.44	235	2	0.21	8.8	#NULL!	#NULL!	#NULL!	#NULL!	8.5	19
1	3615	2022-07-18 09:20:21	1	1	19.9219	73	2	female	2	1.6	51	No	Married	1	#NULL!	0	Digestive System	4	0	1	0	0	0	0	0	68.5	2	25.9	#NULL!	9.67	8.13	84.2	83	1	2	3	1	27.1	0.64	363	3	0.39	10.7	7.05	1.43	1.16	#NULL!	7.3	14
1	3666	2022-07-18 09:32:28	1	1	13.4948	66	1	male	1	1.7	39	No	Married	1	#NULL!	1	Digestive System	4	0	0	0	0	1	0	0	63	1	28.5	136	26.53	22.34	84.2	83	1	2	2.73	1	25.1	1.98	611	3	0.42	6.8	3.38	0.93	0.94	1	4.8	13
1	3648	2022-07-18 11:16:03	2	1	18.3655	70	1	male	1	1.65	50	No	Married	1	#NULL!	0	Respiratory System	4	0	0	0	0	0	0	0	74.9	2	40.2	#NULL!	5.76	3.92	68.2	147	2	1	4.48	2	44.2	1.32	265	2	0.27	10.2	4.94	0.58	2.48	0	11.8	15
1	3638	2022-07-19 08:08:38	2	1	19.1467	74	2	female	2	1.55	46	No	Widowed	0	#NULL!	0	Digestive System	0	0	0	0	0	0	0	0	69.8	2	39.2	#NULL!	5.26	3.55	67.3	120	1	1	4.23	2	35.6	1.39	130	2	0.19	14.8	3.86	0.76	1.27	0	11.7	21
1	3511	2022-07-19 09:34:53	2	0	20.8117	76	3	female	2	1.55	50	No	Married	1	#NULL!	0	Respiratory System	4	0	0	0	0	0	0	0	71.3	2	38.5	#NULL!	4.19	2.5	59.7	105	1	1	3.41	1	31.3	1.31	370	3	0.33	9	4.71	1.34	1.28	0	5.5	72
1	3683	2022-07-19 10:12:23	1	1	19.9219	85	4	male	1	1.6	51	No	Widowed	1	#NULL!	0	Digestive System	0	0	0	0	0	1	0	0	66.6	1	37	#NULL!	3.99	2.15	53.9	135	2	1	4.21	2	38	1.16	172	2	0.18	10.2	#NULL!	#NULL!	#NULL!	#NULL!	23.1	12
1	3575	2022-07-20 10:27:20	1	1	17.3333	82	4	female	2	1.5	39	No	Widowed	0	#NULL!	0	Urinary System	4	0	0	0	0	1	0	0	64.3	1	37.9	#NULL!	7.29	6.1	83.7	81	1	2	3.09	1	25	0.68	265	2	0.27	10.3	4.45	0.84	1.53	0	6.8	14
1	3770	2022-07-21 09:59:26	2	0	22.8928	69	1	female	2	1.55	55	No	Married	1	#NULL!	0	Digestive System	4	0	0	0	0	0	0	0	62.7	1	36.9	205	4.4	2.5	56.9	109	1	1	3.68	1	32.9	1.32	144	2	0.16	11	4.89	8.68	0.57	1	9.5	15
1	3757	2022-07-21 10:20:35	1	0	22.4913	66	1	male	1	1.7	65	No	Married	1	#NULL!	0	Digestive System	0	0	1	0	0	0	0	0	76.8	2	37	173	4.4	2.45	55.8	156	2	1	4.62	2	44.5	1.43	80	1	0.1	12.3	4.56	1.15	1.09	1	16.1	37
1	3789	2022-07-21 11:57:10	2	1	19.8839	70	1	male	1	1.78	63	No	Married	1	#NULL!	0	Reproductive System	0	0	1	1	0	0	0	0	64.7	1	37	#NULL!	8.43	6.54	77.6	134	2	2	4.41	2	41.2	1.04	306	3	0.27	9	5.31	1.2	1.14	#NULL!	9	11
1	3585	2022-07-21 12:20:07	2	0	24.5675	68	1	male	1	1.7	71	No	Married	1	#NULL!	0	Respiratory System	0	0	0	0	0	0	0	0	77.9	2	44.4	#NULL!	5.91	3.48	58.9	160	2	1	5.25	2	47.3	2.03	229	2	0.24	10.3	3.75	1.28	0.91	1	11.3	17
1	3614	2022-07-22 11:23:15	1	1	20.7967	67	1	male	1	1.67	58	No	Married	1	#NULL!	0	Digestive System	4	0	0	1	0	0	0	1	52.7	1	28.3	54	8.72	6.37	72.9	129	2	2	4.29	2	37.3	0.92	371	3	0.32	8.7	3.09	1.49	0.88	1	13.3	10
1	3682	2022-07-23 09:18:39	1	0	24.2123	74	2	male	1	1.76	75	No	Married	1	#NULL!	0	Digestive System	0	1	1	0	0	0	0	0	60.6	1	36	#NULL!	1	5.65	79.4	149	2	2	14.4	2	43.7	0.96	165	2	0.17	10.4	#NULL!	#NULL!	#NULL!	#NULL!	5.5	17
1	3734	2022-07-23 09:26:34	1	0	24.1415	69	1	female	2	1.55	58	No	Other	3	#NULL!	0	Respiratory System	4	0	1	0	0	0	0	0	62.9	1	37.2	#NULL!	4.44	2.88	64.7	121	2	1	3.62	1	35.2	0.99	341	3	0.27	7.7	#NULL!	#NULL!	#NULL!	#NULL!	4.2	23
1	3767	2022-07-23 09:54:40	1	0	26.4236	70	1	male	1	1.74	80	No	Married	1	#NULL!	0	Digestive System	0	0	1	0	0	0	0	0	75.1	2	41.4	150	6.94	5.24	75.5	117	1	2	3.62	1	33.1	0.98	233	2	0.19	8.1	5.26	1.64	0.86	#NULL!	11.5	17
1	3685	2022-07-23 10:34:55	1	0	27.1816	69	1	female	2	1.57	67	No	Married	1	#NULL!	0	Digestive System	0	1	0	0	0	0	0	0	70.9	2	43.2	#NULL!	5.29	3.55	67	142	2	1	4.43	2	42.1	1.38	157	2	0.13	8.3	4.92	1.02	1.48	0	12.6	21
1	3795	2022-07-24 08:36:18	1	1	19.9481	69	1	female	2	1.63	53	No	Widowed	0	#NULL!	0	Endocrine System	0	0	1	0	1	0	0	0	73.8	2	41.2	#NULL!	21.8	3.05	51.5	141	2	1	2.1	1	42.7	2.14	238	2	0.3	12.6	5.26	3.71	0.88	#NULL!	12.2	12
1	3746	2022-07-24 10:38:24	1	0	22.2222	79	3	female	2	1.5	50	No	Other	3	#NULL!	0	Blood System	4	1	1	0	0	0	0	0	68.7	2	42.7	#NULL!	4.49	2.56	56.9	142	2	1	4.59	2	41	1.39	148	2	0.18	12.1	7.32	4.41	1.08	#NULL!	9.3	31
1	3791	2022-07-24 12:29:16	2	0	24.2424	66	1	male	1	1.65	66	No	Other	3	#NULL!	0	Digestive System	0	0	1	0	0	0	0	0	71.5	2	39.1	#NULL!	3.35	1.32	39.5	149	2	1	4.09	2	43	1.27	116	2	0.14	12	#NULL!	#NULL!	#NULL!	#NULL!	15	109
1	3783	2022-07-25 08:45:19	1	0	27.852	65	1	female	2	1.63	74	No	Married	1	#NULL!	0	Reproductive System	0	0	1	0	0	0	0	1	67.5	1	46.4	233	6.28	4.23	67.3	138	2	1	4.38	2	40.5	1.69	197	2	0.2	10.1	4.68	1.04	1.56	0	9.3	9
1	3727	2022-07-25 08:50:21	1	0	24.6548	73	2	female	2	1.56	60	No	Married	1	#NULL!	0	Respiratory System	4	1	1	0	0	0	0	0	63.1	1	36	#NULL!	7.36	4.77	64.7	89	1	1	3.09	1	27.1	2.1	201	2	0.19	9.6	3.77	1.02	0.9	1	3.6	10
1	3658	2022-07-25 09:45:09	1	0	23.2434	69	1	male	1	1.62	61	No	Married	1	#NULL!	0	Reproductive System	0	0	1	1	0	0	0	0	62.9	1	40.3	#NULL!	0	2.7	60.8	127	2	1	0	1	36.5	1.41	115	2	0.17	14.4	#NULL!	#NULL!	#NULL!	#NULL!	14.1	52
1	3609	2022-07-25 09:54:25	1	1	20.202	77	3	male	1	1.65	55	No	Married	1	#NULL!	0	Urinary System	0	0	1	0	0	0	0	0	69.2	2	41.9	240	71	4.64	80.9	148	2	2	10801.3	2	41.6	0.89	327	3	0.31	9.5	4.65	0.94	1.53	0	20.4	32
1	3726	2022-07-25 15:10:14	1	0	23.634	65	1	male	1	1.58	59	No	Married	1	#NULL!	0	Skin & Appendages	4	0	0	0	0	0	0	0	63	1	39.5	#NULL!	4.85	3.36	69.4	140	2	1	4.59	2	41.4	1.08	203	2	0.24	11.7	5.03	1.29	1.15	1	10.9	14
1	3714	2022-07-26 11:22:17	1	1	18.0172	66	1	female	2	1.49	40	No	Married	1	#NULL!	0	Digestive System	0	1	0	0	0	0	0	0	63.4	1	41.4	#NULL!	3.1	1.97	63.5	85	1	1	2.74	1	25.7	0.86	208	2	0.16	7.8	5.09	1.01	2.3	0	8.4	11
1	3466	2022-07-27 10:18:30	2	0	24.977	65	1	male	1	1.65	68	No	Married	1	#NULL!	0	Digestive System	0	0	0	0	0	1	0	0	71.7	2	28	68	3.22	2.03	62.5	128	2	1	3.94	1	37	0.88	94	1	0.1	10.4	3.8	1.12	1.38	0	21.8	26
1	3745	2022-07-28 08:49:47	1	1	14.0971	78	3	female	2	1.53	33	No	Married	1	#NULL!	1	Respiratory System	4	0	0	0	1	0	0	1	62.6	1	26.7	#NULL!	35.25	32.1	91	79	1	2	2.7	1	24.3	1.57	138	2	0.14	10	#NULL!	#NULL!	#NULL!	#NULL!	14.5	10
1	3845	2022-07-28 09:28:30	2	1	15.9439	84	4	male	1	1.68	45	No	Married	1	#NULL!	0	Digestive System	4	0	0	0	0	0	0	0	69.1	2	32.2	#NULL!	5.35	3.68	68.8	114	1	2	3.61	1	32.4	0.99	205	2	0.17	8	#NULL!	#NULL!	#NULL!	#NULL!	11.6	9
1	3725	2022-07-28 09:39:42	2	0	25.3906	85	4	female	2	1.6	65	No	Widowed	0	#NULL!	0	Reproductive System	0	0	1	1	0	1	0	0	63.1	1	35.9	#NULL!	2076.2	3.66	56.2	131	2	1	17.4	2	38.2	2.33	257	2	0.26	9.9	5.47	2.66	1.17	#NULL!	10	8
1	3749	2022-07-28 09:55:02	1	0	22.8571	65	1	male	1	1.75	70	No	Married	1	#NULL!	0	Digestive System	0	0	0	1	0	0	0	0	76	2	46.4	232	5.59	3.74	66.7	153	2	1	4.59	2	43.5	1.4	168	2	0.19	11	6.7	3.95	1.28	#NULL!	14.1	30
1	3678	2022-07-28 10:09:30	1	0	22.2656	85	4	female	2	1.6	57	No	Married	1	#NULL!	1	Digestive System	4	0	1	0	0	0	0	1	55.6	1	26	#NULL!	8.97	7.39	82.4	112	1	2	3.83	1	34.9	0.81	263	2	0.23	8.8	#NULL!	#NULL!	#NULL!	#NULL!	9.6	7
1	3769	2022-07-28 14:47:55	2	0	22.0386	69	1	male	1	1.65	60	No	Other	3	#NULL!	0	Respiratory System	0	0	0	0	0	0	0	0	69.1	2	39.4	#NULL!	10.3	6.74	65.5	149	2	1	5.01	2	43.9	2.7	317	3	0.32	10	3.65	1.1	0.93	1	14.9	14
1	3835	2022-07-29 08:41:49	2	0	32.7919	83	4	male	1	1.61	85	No	Married	1	#NULL!	0	Respiratory System	4	0	0	0	0	0	0	0	70.9	2	39.2	#NULL!	4.77	2.71	56.8	147	2	1	4.53	2	43	1.38	120	2	0.13	11.2	5.32	0.77	1.52	#NULL!	9.3	16
1	3621	2022-07-29 09:07:44	1	0	25.6896	77	3	male	1	1.72	76	No	Married	1	#NULL!	0	Digestive System	0	1	0	0	0	0	0	0	63.6	1	37	#NULL!	9.9	9.05	91.4	153	2	2	4.61	2	43.7	0.54	151	2	0.15	9.9	3.32	0.48	1.47	0	18.1	24
1	3662	2022-07-29 09:08:55	1	0	29.4078	72	2	male	1	1.72	87	No	Married	1	#NULL!	0	Digestive System	0	0	1	0	1	0	0	0	74.1	2	41.8	#NULL!	7.15	4.37	61.1	127	2	1	4.75	2	39.1	1.96	408	3	0.38	9.2	4.33	1.31	0.76	1	8.8	16
1	3681	2022-07-29 10:37:52	1	0	20.9366	71	2	male	1	1.65	57	No	Married	1	#NULL!	0	Reproductive System	0	0	0	0	0	0	0	0	75	2	46	#NULL!	87.1	9.24	84.1	169	2	2	3782.4	2	49.3	1.12	191	2	0.24	12.7	#NULL!	#NULL!	#NULL!	#NULL!	24.8	27
1	3831	2022-07-29 15:10:42	1	0	21.4844	69	1	male	1	1.6	55	No	Married	1	#NULL!	0	Respiratory System	4	0	1	0	0	0	0	0	63.9	1	34.6	#NULL!	17.47	15.73	90	150	2	2	4.95	2	42.2	0.92	216	2	0.18	8.3	#NULL!	#NULL!	#NULL!	#NULL!	9	66
1	3698	2022-07-30 09:09:14	1	0	27.2509	72	2	male	1	1.67	76	No	Married	1	#NULL!	0	Digestive System	0	0	1	1	0	0	0	0	75.3	2	43.7	#NULL!	10.51	4.55	43.3	157	2	1	4.54	2	45.5	4.81	187	2	0.19	10.1	5.44	2.59	1.49	#NULL!	18.6	40
1	3777	2022-07-30 09:57:45	1	0	24	65	1	female	2	1.5	54	No	Other	3	#NULL!	0	Digestive System	0	0	1	1	1	0	0	0	71.2	2	38.3	#NULL!	4.21	2.44	57.9	90	1	1	3.39	1	27	1.34	240	2	0.22	9.2	3.15	1.95	1	1	6.5	10
1	3718	2022-07-30 09:58:02	1	0	24.3046	73	2	female	2	1.61	63	No	Married	1	#NULL!	0	Reproductive System	0	1	1	0	1	0	0	0	73.4	2	40	#NULL!	0	2.91	61.4	127	2	1	6.8	2	38.4	1.42	166	2	0.15	9	5.15	2.14	1.45	1	7.5	15
1	3781	2022-07-31 08:33:16	1	0	25	84	4	female	2	1.6	64	No	Widowed	0	#NULL!	0	Endocrine System	0	1	1	0	0	1	0	0	78.3	2	38.3	#NULL!	4.66	2.77	59.5	109	1	1	3.77	1	32.5	1.36	307	3	0.27	8.8	5.97	0.9	1.41	#NULL!	10.1	13
1	3717	2022-07-31 08:51:34	1	0	24.5675	75	2	male	1	1.7	71	No	Married	1	#NULL!	0	Respiratory System	4	0	0	0	1	0	0	0	75.6	2	45.5	#NULL!	5.94	3.21	54	135	2	1	4.46	2	38	1.15	231	2	0.23	9.9	4.92	1.78	1.1	1	6.6	80
1	3582	2022-07-31 09:58:18	1	0	26.2222	65	1	female	2	1.5	59	No	Married	1	#NULL!	0	Digestive System	0	1	1	1	0	1	0	0	57.9	1	33.3	#NULL!	6.63	4.96	74.8	116	1	2	3.85	1	35	1.2	163	2	0.14	8.3	2.81	0.84	0.99	1	9	12
1	3668	2022-07-31 10:05:52	1	0	28.1969	65	1	female	2	1.62	74	No	Married	1	#NULL!	0	Digestive System	0	0	1	0	0	1	0	0	76	2	32.9	#NULL!	21.7	6.63	73.4	117	1	2	0	2	34.8	1.54	462	3	0.43	9.3	#NULL!	#NULL!	#NULL!	#NULL!	146.9	51
1	3819	2022-07-31 16:11:14	1	0	20.7612	66	1	male	1	1.7	60	No	Married	1	#NULL!	0	Respiratory System	4	0	0	0	0	0	0	0	69.6	2	43.3	#NULL!	3.59	2.4	66.6	130	2	1	4.18	2	38.7	0.77	100	2	0.11	11.8	5.22	0.79	1.75	#NULL!	8.7	52
1	3800	2022-08-01 08:48:03	1	0	20.7612	74	2	male	1	1.7	60	No	Married	1	#NULL!	0	Digestive System	4	1	0	0	0	0	0	0	69.1	2	40.3	#NULL!	5.08	2.99	59	139	2	1	4.11	2	40	1.38	143	2	0.11	7.9	#NULL!	#NULL!	#NULL!	#NULL!	14.9	17
1	3719	2022-08-01 09:00:57	1	0	23.2434	73	2	male	1	1.62	61	No	Married	1	#NULL!	0	Blood System	4	0	0	0	0	0	0	0	68.5	2	40.7	#NULL!	49.89	3.59	7.2	108	1	1	4.04	2	34.5	45.51	115	2	0.12	10.5	3.71	0.58	0.79	1	6.8	10
1	3820	2022-08-01 09:09:13	1	0	23.5294	69	1	male	1	1.7	68	No	Married	1	#NULL!	0	Digestive System	4	0	0	0	0	0	0	0	71.7	2	30.6	#NULL!	8.75	6.45	73.7	122	2	2	3.83	1	35.4	1.6	337	3	0.35	10.4	#NULL!	#NULL!	#NULL!	#NULL!	24.1	34
1	3773	2022-08-01 09:16:37	1	0	24.6094	68	1	female	2	1.6	63	No	Other	3	#NULL!	0	Digestive System	0	0	0	0	0	0	0	0	72.8	2	42.1	#NULL!	4.29	2.87	66.9	137	2	1	4.54	2	41.2	1.07	225	2	0.2	9	4.53	1.55	1.06	1	10.6	13
1	3758	2022-08-01 10:30:32	1	1	18.4265	81	4	male	1	1.58	46	No	Married	1	#NULL!	0	Respiratory System	0	0	1	0	0	0	0	0	70.2	2	42.5	219	3.2	3	60.1	120	1	1	0	2	36.7	1.51	162	2	0.2	12.2	4.28	0.59	1.67	0	15.8	30
1	3439	2022-08-01 12:03:33	2	0	23.4375	67	1	male	1	1.6	60	No	Married	1	#NULL!	0	Urinary System	0	1	0	0	0	1	0	0	70.5	2	44.5	#NULL!	4.66	2.84	61.1	169	2	1	5.23	2	49.8	1.27	151	2	0.18	12	#NULL!	#NULL!	#NULL!	#NULL!	6.8	65
1	3661	2022-08-02 10:40:11	1	0	24.0344	68	1	female	2	1.54	57	No	Married	1	#NULL!	0	Respiratory System	0	0	1	0	1	0	0	0	77	2	45.1	#NULL!	6.29	4.79	76.1	193	2	2	6.57	2	58.7	1.1	242	2	0.24	9.8	6.83	1.83	1.36	#NULL!	9.7	26
1	3697	2022-08-02 11:42:11	1	0	24.2439	78	3	female	2	1.56	59	No	Married	1	#NULL!	0	Respiratory System	0	0	0	0	0	0	0	0	74.7	2	43.9	#NULL!	5.57	3.46	62.2	143	2	1	4.61	2	40.9	1.69	193	2	0.19	9.6	4.9	0.89	1.73	0	18.2	26
1	3846	2022-08-02 12:38:34	1	1	18.3391	77	3	male	1	1.7	53	No	Married	1	#NULL!	0	Respiratory System	4	0	0	0	0	0	0	0	75.6	2	39.4	#NULL!	6.35	4.7	74.1	159	2	2	5.45	2	46.7	0.91	306	3	0.29	9.4	#NULL!	#NULL!	#NULL!	#NULL!	12.7	33
1	3693	2022-08-03 08:23:56	1	1	#NULL!	69	1	male	1	1.68	#NULL!	Yes	Married	1	#NULL!	0	Digestive System	4	0	1	1	0	0	0	0	69.4	2	41.3	254	20.12	16.53	82.2	113	1	2	3.58	1	30	2.11	211	2	0.21	10.1	#NULL!	#NULL!	#NULL!	#NULL!	3	8
1	3724	2022-08-03 08:31:05	1	1	18.0802	84	4	male	1	1.56	44	No	Married	1	#NULL!	0	Other	4	0	0	0	0	0	0	0	67.8	1	33.2	159	8	2.29	48.8	129	2	1	2	1	38.9	1.65	325	3	0.3	9.4	4.23	0.82	1.25	0	4.5	19
1	3785	2022-08-03 08:31:20	2	0	25.2081	79	3	female	2	1.45	53	No	Widowed	0	#NULL!	0	Reproductive System	0	0	1	1	0	1	0	0	69.6	2	44.9	#NULL!	4.88	3.87	79.3	151	2	2	4.91	2	43.7	0.61	207	2	0.22	10.4	#NULL!	#NULL!	#NULL!	#NULL!	22.6	29
1	3811	2022-08-03 09:24:31	1	1	17.4747	81	4	male	1	1.64	47	No	Married	1	#NULL!	0	Respiratory System	0	0	1	0	1	0	0	0	75.2	2	49.2	#NULL!	5.53	3.98	71.9	155	2	2	5.42	2	45.8	1.02	171	2	0.2	11.8	#NULL!	#NULL!	#NULL!	#NULL!	11	31
1	3890	2022-08-03 09:46:10	1	1	19.7232	73	2	male	1	1.7	57	No	Married	1	#NULL!	0	Respiratory System	4	0	0	0	0	0	0	0	60	1	31.5	#NULL!	3.75	1.91	50.9	120	1	1	3.84	1	35	1.27	133	2	0.12	8.8	#NULL!	#NULL!	#NULL!	#NULL!	3.1	18
1	3810	2022-08-03 11:01:47	1	1	20.0692	78	3	male	1	1.7	58	No	Married	1	#NULL!	0	Urinary System	0	1	0	0	0	1	0	0	61.4	1	33.9	#NULL!	7.17	6.1	85.2	140	2	2	3.85	1	40.1	0.54	122	2	0.14	11.2	#NULL!	#NULL!	#NULL!	#NULL!	6.8	16
1	3722	2022-08-03 11:53:29	1	0	23.9995	74	2	male	1	1.72	71	No	Married	1	#NULL!	0	Reproductive System	0	0	1	0	0	1	0	0	65.8	1	37.5	#NULL!	10.88	8.85	81.3	133	2	2	4.05	2	38	1.22	123	2	0.13	10.3	5.19	0.93	1.19	1	25.3	10
1	3895	2022-08-04 08:48:34	1	0	22.6667	70	1	female	2	1.5	51	No	Married	1	#NULL!	0	Respiratory System	4	0	0	0	0	0	0	0	70.4	2	42.4	215	3.63	2.07	57	120	1	1	3.91	1	36.9	1.22	135	2	0.17	12.9	5.95	1.9	1.36	#NULL!	6.8	14
1	3896	2022-08-04 08:55:45	2	0	27.1111	75	2	male	1	1.5	61	No	Married	1	#NULL!	0	Hematologic System	4	0	0	0	0	0	0	0	68.4	2	39.8	#NULL!	3.74	2.1	56.2	147	2	1	4.54	2	43	1.12	127	2	0.16	12.5	4.65	1.96	1.13	1	18.5	28
1	3763	2022-08-04 10:16:27	1	0	22.6659	65	1	female	2	1.44	47	No	Married	1	#NULL!	0	Reproductive System	4	0	1	1	0	1	0	0	85.7	2	36.8	167	4.99	3.22	64.5	89	1	1	3.49	1	26	1.45	432	3	0.36	8.3	5.08	1.46	0.86	1	3.3	15
1	3695	2022-08-05 08:26:52	1	1	20.0692	70	1	male	1	1.7	58	No	Married	1	#NULL!	0	Respiratory System	4	0	0	0	0	0	0	0	66.3	1	38	#NULL!	6.69	4.08	61.2	133	2	1	4.29	2	38.4	1.81	260	2	0.24	9.2	5.51	1.21	1.12	#NULL!	5.5	13
1	3790	2022-08-05 09:52:40	1	0	24.2215	71	2	male	1	1.7	70	No	Married	1	#NULL!	0	Urinary System	4	0	1	1	0	0	0	0	75.5	2	39.3	324	1316.6	2.79	60	117	1	1	39.2	2	35.5	1.4	219	2	0.18	8.3	4.7	1.68	1.11	1	3.4	16
1	3804	2022-08-05 11:57:11	1	0	29.3776	70	1	male	1	1.76	91	No	Married	1	#NULL!	0	Reproductive System	0	0	0	0	0	0	0	0	71.5	2	45.3	#NULL!	59.6	3.5	59	159	2	1	39252.5	2	45.3	2.06	250	2	0.2	8	#NULL!	#NULL!	#NULL!	#NULL!	14.3	22
1	3852	2022-08-06 08:45:18	1	1	17.1468	83	4	female	2	1.62	45	No	Married	1	#NULL!	0	Digestive System	4	0	0	0	0	0	0	0	71.7	2	39.3	#NULL!	8.66	5.92	68.4	112	1	2	3.71	1	32.8	1.82	239	2	0.24	9.9	#NULL!	#NULL!	#NULL!	#NULL!	44.7	45
1	3827	2022-08-06 09:12:21	1	0	32.3939	66	1	female	2	1.47	70	No	Married	1	#NULL!	0	Reproductive System	4	0	0	0	0	0	0	0	81.5	2	47.3	#NULL!	305.1	1.12	39.9	133	2	1	24.9	2	39.7	1.4	257	2	0.23	9	#NULL!	#NULL!	#NULL!	#NULL!	5.8	18
1	3888	2022-08-06 09:25:04	1	0	24.3418	70	1	male	1	1.57	60	No	Married	1	#NULL!	0	Digestive System	0	0	0	0	0	0	0	0	67.2	1	42.6	241	1.4	2.65	48.9	164	2	1	1.4	1	47.3	0.99	124	2	0.15	12.4	3.98	0.77	1.29	0	17.3	26
1	3812	2022-08-06 09:53:49	1	1	16.8919	74	2	female	2	1.48	37	No	Married	1	#NULL!	0	Reproductive System	4	0	0	0	0	0	0	1	53.4	1	22.6	158	5.46	4.38	80.1	104	1	2	3.23	1	30.3	0.77	302	3	0.26	8.7	6.05	1.54	0.94	#NULL!	4.7	13
1	3824	2022-08-06 10:30:45	1	0	29.271	71	2	male	1	1.59	74	No	Married	1	#NULL!	0	Digestive System	0	0	1	0	0	0	0	0	69.6	2	36.7	#NULL!	6.45	4.06	62.9	172	2	1	6.14	2	51.5	1.61	198	2	0.2	9.8	6.29	2.44	1	#NULL!	10.2	72
1	3875	2022-08-06 10:37:36	1	0	26.0375	70	1	female	2	1.58	65	No	Married	1	#NULL!	0	Reproductive System	0	1	0	0	0	0	0	0	76.1	2	40.9	#NULL!	547.8	3.46	62.5	128	2	1	0	2	38.8	1.28	154	2	0.19	12.5	6.32	2.33	1.33	#NULL!	5.4	16
1	3821	2022-08-06 11:35:30	1	0	23.5078	70	1	male	1	1.65	64	No	Married	1	#NULL!	0	Respiratory system	4	1	0	0	0	0	0	0	70.8	2	35.9	#NULL!	12.12	9.68	79.9	125	2	2	4.29	2	37.3	1.52	386	3	0.35	9	#NULL!	#NULL!	#NULL!	#NULL!	20.6	20
1	3700	2022-08-07 09:13:01	1	1	18.0802	86	5	male	1	1.56	44	No	Married	1	#NULL!	0	Digestive System	0	0	0	0	1	0	0	0	65.5	1	30	#NULL!	7.12	5.1	71.6	77	1	2	3.85	1	25	1.06	259	2	0.22	8.7	2.77	1.09	0.66	1	6.3	20
1	3595	2022-08-07 10:14:34	2	0	24.6094	80	3	male	1	1.6	63	No	Married	1	#NULL!	0	Reproductive system	4	0	1	1	0	1	0	0	78.8	2	42.1	#NULL!	5.43	4.3	79.3	141	2	2	4.42	2	40.8	0.65	260	2	0.24	9.2	4.66	1.85	1.05	1	12.4	289
1	3891	2022-08-08 09:09:37	1	0	24.4898	74	2	male	1	1.75	75	No	Married	1	#NULL!	0	Digestive System	0	1	1	0	0	0	0	0	58.8	1	36.2	#NULL!	5.62	4.19	74.7	148	2	2	4.64	2	42.1	0.94	131	2	0.14	10.5	#NULL!	#NULL!	#NULL!	#NULL!	8.2	20
1	3904	2022-08-08 09:15:44	1	0	26.1752	67	1	male	1	1.67	73	No	Married	1	#NULL!	0	Respiratory System	0	0	0	0	1	0	0	0	71.8	2	40.6	#NULL!	6.05	4	66	159	2	1	5.39	2	45.9	1.53	181	2	0.19	10.5	3.2	1.37	1.05	1	16.6	27
1	3737	2022-08-08 09:49:37	1	0	24.4646	78	3	female	2	1.63	65	No	Married	1	#NULL!	0	Digestive System	0	0	1	1	1	0	0	1	75.4	2	30.2	#NULL!	3.66	2.73	74.5	144	2	2	4.33	2	41.8	0.49	94	1	0.1	12	4.51	0.83	1.64	0	36.6	49
1	3797	2022-08-08 10:14:08	1	1	19.3625	76	3	male	1	1.67	54	No	Married	1	#NULL!	0	Digestive System	4	0	0	0	0	0	0	0	57.2	1	26.8	#NULL!	6.68	4.93	73.6	84	1	2	3.01	1	26.4	1.51	230	2	0.28	12.3	#NULL!	#NULL!	#NULL!	#NULL!	8.4	46
1	3806	2022-08-08 11:12:03	1	1	20.4491	77	3	male	1	1.64	55	No	Married	1	#NULL!	0	Urinary System	0	0	1	0	0	1	0	0	67.6	1	39.4	#NULL!	11.81	9.67	81.9	143	2	2	4.29	2	39	0.95	241	2	0.21	8.8	#NULL!	#NULL!	#NULL!	#NULL!	33.8	20
1	3675	2022-08-08 11:18:49	1	0	25	72	2	male	1	1.6	64	No	Married	1	#NULL!	0	Digestive System	0	0	1	0	0	0	0	0	66.8	1	43	#NULL!	5	4.67	68.8	163	2	2	3.7	1	46.6	1.37	198	2	0.22	11	4.63	1.38	1.09	1	11.2	29
1	3930	2022-08-08 20:36:19	1	1	16.8663	78	3	female	2	1.54	40	No	Widowed	0	#NULL!	0	Respiratory System	0	0	1	0	0	0	0	0	58.5	1	36.6	194	5.5	3.77	69.7	108	1	1	5.5	2	32.2	1.21	139	2	0.16	11.2	4.25	1.14	1.36	0	11	44
1	3867	2022-08-09 09:47:56	2	0	30.1162	71	2	male	1	1.68	85	No	Married	1	#NULL!	0	Digestive System	0	0	0	0	0	0	0	0	63.7	1	34	#NULL!	3.33	2.08	62.6	124	2	1	5.05	2	38.6	0.96	147	2	0.14	9.9	#NULL!	#NULL!	#NULL!	#NULL!	21	27
1	3870	2022-08-09 09:48:07	1	1	17.9688	86	5	female	2	1.6	46	No	Widowed	3	#NULL!	0	Digestive System	0	0	1	0	0	0	0	0	59.4	1	30.4	#NULL!	9.34	7.38	79	95	1	2	3.28	1	29.6	1.36	306	3	0.27	8.9	#NULL!	#NULL!	#NULL!	#NULL!	5.5	10
1	3900	2022-08-10 09:02:39	2	1	16.6603	82	4	female	2	1.53	39	No	Widowed	0	#NULL!	0	Urinary System	0	0	0	0	0	0	0	0	66.2	1	39.5	#NULL!	5.36	4.34	81.1	88	1	2	3.33	1	27.6	0.52	226	2	0.23	10.3	4.66	1.45	1.19	0	3	13
1	3897	2022-08-10 09:05:49	2	0	25.8264	70	1	male	1	1.76	80	No	Married	1	#NULL!	0	Digestive System	0	0	1	0	1	0	0	0	71	2	40	#NULL!	4.06	2.36	58.1	123	2	1	3.82	1	33	1.18	231	2	0.19	8.2	4.81	6.06	0.48	1	8.8	16
1	3823	2022-08-10 10:07:31	1	1	18.424	68	1	male	1	1.68	52	No	Married	1	#NULL!	0	Respiratory System	0	0	0	0	0	0	0	1	72	2	38.1	#NULL!	19.84	16.9	85.1	97	1	2	3.58	1	30.9	1.81	540	3	0.44	8.1	5.28	1.11	0.88	#NULL!	8.7	56
1	3909	2022-08-10 16:33:57	2	0	22.0522	75	2	male	1	1.73	66	No	Married	1	#NULL!	0	Respiratory System	0	0	1	0	0	0	0	0	73	2	47.6	#NULL!	6.78	5.02	74	174	2	2	5.37	2	51.4	1.15	170	2	0.21	12.3	4.72	1.65	1.17	0	19.2	30
1	3863	2022-08-11 09:31:22	1	1	19.7266	76	3	male	1	1.6	50.5	No	Married	1	#NULL!	0	Reproductive System	0	0	0	0	0	0	0	0	63.3	1	31.2	#NULL!	6.22	3.74	60.2	128	2	1	4.1	2	37	1.75	215	2	0.22	10	#NULL!	#NULL!	#NULL!	#NULL!	3.8	16
1	3935	2022-08-11 09:37:42	1	0	25.1559	73	2	male	1	1.68	71	No	Married	1	#NULL!	0	Respiratory System	0	0	1	0	0	1	0	0	70.6	2	42.8	#NULL!	8.24	5.15	62.5	168	2	1	5.38	2	47	1.86	212	2	0.19	8.9	5.32	0.6	1.07	#NULL!	18.8	16
1	3864	2022-08-11 11:01:50	1	0	26.6999	66	1	female	2	1.59	67.5	No	Married	1	#NULL!	0	Respiratory System	4	0	1	1	0	0	0	0	80.4	2	43.5	#NULL!	12.62	8.94	70.9	171	2	1	5.37	2	48.2	2.88	213	2	0.22	10.2	#NULL!	#NULL!	#NULL!	#NULL!	27.6	28
1	3886	2022-08-12 09:13:14	1	0	25.8065	82	4	female	2	1.55	62	No	Widowed	0	#NULL!	0	Digestive system	0	0	0	0	0	0	0	0	70.6	2	29.1	#NULL!	7.74	5.58	72.2	126	2	2	4.25	2	35.9	1.4	256	2	0.27	10.6	5.85	2.73	0.16	#NULL!	205.8	94
1	3948	2022-08-12 09:36:24	1	0	24.5089	65	1	male	1	1.69	70	No	Married	1	#NULL!	0	Reproductive system	0	0	1	1	1	0	0	0	73.8	2	34.6	#NULL!	565.9	4.03	70.5	88	1	2	29.8	2	25	0.95	242	2	0.22	9.1	4.3	2.3	0.82	1	11.5	18
1	3883	2022-08-12 09:56:04	1	0	23.9361	69	1	female	2	1.57	59	No	Other	3	#NULL!	0	Respiratory System	4	0	1	0	0	0	0	0	71.3	2	43	#NULL!	5.7	4.09	71.8	148	2	2	4.8	2	42.4	1.19	250	2	0.22	8.8	#NULL!	#NULL!	#NULL!	#NULL!	7.1	21
1	3914	2022-08-12 10:01:52	1	1	19.5918	89	5	male	1	1.75	60	No	Married	1	#NULL!	0	Digestive System	0	1	1	1	1	0	0	0	63.6	1	36.5	#NULL!	4.3	7.38	72.2	130	2	2	148.8	2	37.8	1.87	205	2	0.16	7.9	#NULL!	#NULL!	#NULL!	#NULL!	8.7	11
1	3928	2022-08-14 08:40:46	1	1	18.4676	66	1	female	2	1.49	41	No	Unmarried	#NULL!	#NULL!	0	Digestive System	0	1	0	0	0	0	0	0	60.9	1	39.9	#NULL!	7.1	0.72	31.1	83	1	1	23.9	2	24.8	1.2	179	2	0.15	8.3	5.3	1.66	2.32	#NULL!	9.5	16
1	3859	2022-08-15 09:19:20	1	0	24.5243	75	2	male	1	1.59	62	No	Married	1	#NULL!	0	Digestive System	4	0	0	1	0	0	0	1	56.7	1	30.6	#NULL!	5.72	4.12	71.9	126	2	2	3.82	1	37.1	0.91	60	1	0.08	12.8	#NULL!	#NULL!	#NULL!	#NULL!	33.2	42
1	3743	2022-08-15 11:11:36	1	0	35.8408	73	2	female	2	1.54	85	No	Other	3	#NULL!	0	Respiratory System	0	0	1	1	0	0	0	0	72.2	2	42.9	#NULL!	7.4	4.72	63.8	157	2	1	5.1	2	46.4	2.27	132	2	0.17	12.8	5.38	1.53	1.57	#NULL!	12.7	135
1	3941	2022-08-15 15:29:50	1	1	20.3125	73	2	female	2	1.6	52	No	Married	1	#NULL!	0	Respiratory System	0	0	0	0	0	0	0	0	74	2	42.6	#NULL!	6.44	3.21	49.9	142	2	1	4.7	2	42.4	2.26	167	2	0.21	12.7	#NULL!	#NULL!	#NULL!	#NULL!	9.6	18
1	3884	2022-08-16 10:21:16	1	1	17.1875	66	1	male	1	1.6	44	No	Married	1	#NULL!	0	Digestive System	0	1	0	0	0	0	0	0	60.9	1	28.5	#NULL!	7.96	7.14	89.7	79	1	2	2.65	1	23.7	0.4	245	2	0.23	9.5	#NULL!	#NULL!	#NULL!	#NULL!	13.3	15
1	3933	2022-08-18 09:07:14	2	0	26.4915	67	1	male	1	1.66	73	No	Other	3	#NULL!	0	Respiratory System	0	0	0	0	0	0	0	0	63.3	1	38.9	#NULL!	5.11	2.66	51.9	140	2	1	4.02	2	40.7	1.66	128	2	0.14	11	#NULL!	#NULL!	#NULL!	#NULL!	11.6	28
1	3915	2022-08-18 09:08:17	1	1	17.0562	74	2	male	1	1.66	47	No	Married	1	#NULL!	0	Digestive System	0	1	0	0	0	0	0	0	69.9	2	41.7	#NULL!	8.42	7.41	88	149	2	2	4.62	2	43.3	0.8	275	2	0.3	11	#NULL!	#NULL!	#NULL!	#NULL!	14.6	10
1	3907	2022-08-18 09:49:55	1	0	22.4248	65	1	female	2	1.44	46.5	No	Married	1	#NULL!	0	Reproductive System	4	0	1	1	0	0	0	0	82.4	2	37	179	6.27	4.6	73.3	79	1	2	3.11	1	24.1	1.28	458	3	0.35	7.6	#NULL!	#NULL!	#NULL!	#NULL!	3.8	15
1	3923	2022-08-18 09:54:16	2	0	20.7612	74	2	male	1	1.7	60	No	Married	1	#NULL!	0	Endocrine System	4	0	1	1	1	0	0	0	69.8	2	45.5	#NULL!	7.61	4.99	65.5	142	2	1	4.46	2	44	2.01	175	2	0.17	9.9	4.71	1.06	1.56	0	8.5	16
1	3917	2022-08-18 11:17:47	1	0	22.1453	79	3	male	1	1.7	64	No	Married	1	#NULL!	0	Respiratory System	4	1	0	0	1	1	0	0	56.5	1	29.8	#NULL!	5.1	3.24	63.5	69	1	1	2.22	1	21.3	1.12	103	2	0.1	9.4	2.98	1.26	0.65	1	17	8
1	4006	2022-08-19 08:59:58	2	0	22.3703	67	1	female	2	1.48	49	No	Married	1	#NULL!	0	Respiratory System	4	0	1	0	0	0	0	0	72.1	2	48.3	260	5.91	3.81	64.5	136	2	2	4.57	2	39.8	1.1	229	2	0.2	8.9	4.46	1.54	1.2	0	11.8	20
1	4102	2022-08-19 14:06:22	1	0	23.8751	66	1	male	1	1.65	65	No	Married	1	#NULL!	0	Respiratory System	4	0	0	0	0	0	0	0	67.4	1	42.9	#NULL!	4.26	2.51	58.9	151	2	1	4.87	2	45	1.28	239	2	0.22	9.3	4.34	2.49	1.1	1	21.6	23
1	3929	2022-08-20 10:50:26	1	0	25.9107	71	2	male	1	1.62	68	No	Married	1	#NULL!	0	Digestive System	0	0	1	1	0	0	0	0	78.3	2	39.4	#NULL!	3.9	5.21	71.1	180	2	2	0	2	53.7	1.5	117	2	0.15	12.5	3.71	1.43	0.74	1	26.5	74
1	4067	2022-08-20 10:50:26	1	0	25.3902	82	4	female	2	1.55	61	No	Married	1	#NULL!	0	Digestive System	0	1	0	1	0	0	0	0	72	2	29.3	#NULL!	15.95	12.81	80.3	128	2	2	4.27	2	38.4	2.06	355	3	0.34	9.4	#NULL!	#NULL!	#NULL!	#NULL!	136.3	53
1	3938	2022-08-20 11:43:16	1	0	24.2215	71	2	male	1	1.7	70	No	Married	1	#NULL!	0	Urinary System	0	0	1	1	0	0	0	0	63.1	1	34.4	297	5.48	3.63	66.1	106	1	1	3.62	1	31.9	1.27	216	2	0.18	8.1	4.09	1.39	1.12	1	4.6	14
1	3976	2022-08-20 12:32:09	1	0	27.6817	75	2	male	1	1.7	80	No	Married	1	#NULL!	0	Respiratory System	4	0	1	0	0	0	0	0	65.1	1	37.4	#NULL!	9.64	6.66	69	148	2	1	4.55	2	45.6	2.2	263	2	0.23	8.8	#NULL!	#NULL!	#NULL!	#NULL!	11.7	6
1	3957	2022-08-21 08:41:48	1	0	26.5731	66	1	male	1	1.68	75	No	Married	1	#NULL!	0	Urinary System	0	0	1	0	0	0	0	0	70	2	38.7	#NULL!	7.71	5.5	71.4	156	2	2	5.31	2	46.9	1.31	201	2	0.17	8.3	4.09	1.02	0.68	1	13.9	10
1	4027	2022-08-21 09:22:29	1	0	24.1633	74	2	male	1	1.75	74	No	Married	1	#NULL!	0	Digestive System	0	1	1	0	0	0	0	0	64.6	1	41.3	#NULL!	3.1	3.46	64.2	146	2	1	13.4	2	41.9	1.36	126	2	0.11	8.9	#NULL!	#NULL!	#NULL!	#NULL!	12.5	12
1	4034	2022-08-21 10:35:42	1	0	27.7008	67	1	female	2	1.52	64	No	Married	1	#NULL!	0	Respiratory System	0	0	1	0	0	0	0	0	78.7	2	49.4	#NULL!	4.79	2.87	60	136	2	1	4.39	2	40.1	1.55	135	2	0.16	12.1	5.74	2.36	1.07	#NULL!	15.5	23
1	4000	2022-08-22 08:39:30	1	0	23.6614	69	1	male	1	1.72	70	No	Married	1	#NULL!	0	Reproductive System	4	0	0	0	0	0	0	0	62.6	1	37.5	256	5.51	3.04	55.3	104	1	1	3.33	1	33.5	2.09	176	2	0.15	8.7	6.74	4.11	1.07	#NULL!	7.5	10
1	3975	2022-08-22 09:13:43	1	0	32.4661	66	1	female	2	1.53	76	No	Married	1	#NULL!	0	Digestive System	0	0	1	1	0	1	0	0	56.3	1	30.6	#NULL!	6.25	4.69	75.1	120	1	2	4.58	2	39	1.03	261	2	0.23	8.8	#NULL!	#NULL!	#NULL!	#NULL!	9	10
1	3999	2022-08-22 09:40:59	1	0	23.6244	75	2	female	2	1.62	62	No	Widowed	0	#NULL!	0	Reproductive System	0	1	0	0	0	0	0	0	61.5	1	38.2	#NULL!	0	4.08	88.9	125	2	2	0	1	40.3	0.42	150	2	0.14	9.4	4.64	1.94	0.95	1	5.1	33
1	3983	2022-08-22 09:56:33	1	1	19.8178	66	1	female	2	1.54	47	No	Married	1	#NULL!	0	Digestive System	4	1	0	0	0	0	0	0	76.8	2	39.5	#NULL!	7.65	5.07	66.4	121	2	1	3.74	1	35.3	1.68	343	3	0.25	7.4	#NULL!	#NULL!	#NULL!	#NULL!	7.7	14
1	3986	2022-08-22 10:27:12	1	1	13.1488	69	1	male	1	1.7	38	No	Widowed	0	#NULL!	0	Digestive System	0	0	0	0	0	0	0	0	68.5	2	32	#NULL!	5.92	3.51	59	128	2	1	4	1	39.4	1.92	247	2	0.24	9.7	#NULL!	#NULL!	#NULL!	#NULL!	57.9	202
1	4001	2022-08-23 08:58:56	2	0	22.2222	81	4	female	2	1.5	50	No	Widowed	0	#NULL!	0	Digestive System	4	0	1	0	0	0	0	1	68.9	2	37.4	#NULL!	5.86	4.45	76.1	105	1	2	4	1	34.9	0.85	364	3	0.29	8	7.33	1.69	1.06	#NULL!	13.9	36
1	3874	2022-08-23 11:58:11	2	0	22.7694	72	2	female	2	1.54	54	No	Married	1	#NULL!	0	Respiratory System	0	0	0	0	0	0	0	0	70.3	2	44.8	#NULL!	8.02	5.14	64.1	131	2	1	4.48	2	39.5	2.45	246	2	0.23	9.2	3.32	0.85	1.22	0	8.4	32
1	3977	2022-08-24 09:24:17	2	1	19.9792	88	5	male	1	1.55	48	No	Widowed	0	#NULL!	1	Digestive System	4	0	0	0	1	0	0	0	66	1	32.2	#NULL!	7.68	6.4	83.3	128	2	2	4.47	2	37.2	0.8	174	2	0.19	11	5.43	1.04	1.55	#NULL!	12.7	16
1	4080	2022-08-25 08:46:26	1	0	30.478	70	1	male	1	1.67	85	No	Married	1	#NULL!	0	Reproductive System	4	0	0	0	0	0	0	0	80.2	2	46.8	244	0	2.18	51	161	2	1	1.2	1	48.2	1.68	227	2	0.2	8.8	5.21	2.65	1.07	#NULL!	8.5	37
1	3971	2022-08-25 09:10:27	1	0	24.4141	74	2	male	1	1.6	62.5	No	Married	1	#NULL!	0	Blood System	4	0	0	0	0	0	0	0	67.3	1	41.4	#NULL!	61.45	5.29	8.6	111	1	1	3.84	1	34.9	54.68	86	1	0.11	12.5	#NULL!	#NULL!	#NULL!	#NULL!	8	10
1	4076	2022-08-25 09:20:57	1	1	19.1111	84	4	female	2	1.5	43	No	Other	3	#NULL!	0	Skin & Appendages	0	0	1	0	1	0	0	0	60.3	1	36.6	#NULL!	4.58	2.83	62	130	2	1	4.33	2	38.7	1.13	275	2	0.28	10	4.09	0.71	1.54	0	6.5	10
1	3750	2022-08-25 09:34:17	2	0	25.6055	73	2	male	1	1.7	74	No	Other	3	#NULL!	0	Respiratory System	0	1	1	1	0	1	0	0	53.4	1	31.5	#NULL!	8.4	5.99	71.1	116	1	2	3.83	1	34.7	1.42	145	2	0.16	11.2	3.04	1.21	0.71	1	6.4	35
1	3739	2022-08-25 09:38:12	1	0	27.4756	65	1	female	2	1.63	73	No	Married	1	#NULL!	0	Reproductive System	0	1	1	0	0	0	0	1	64.2	1	44.6	258	6.01	3.92	65.2	137	2	1	4.4	2	40	1.68	191	2	0.18	9.5	5.32	2	1.4	#NULL!	7.5	18
1	4004	2022-08-25 09:50:25	1	1	21.1073	87	5	male	1	1.7	61	No	Other	3	#NULL!	0	Digestive System	4	0	1	0	0	0	0	0	62.1	1	38.1	#NULL!	9.43	7.12	75.5	158	2	2	5.12	2	46.2	1.6	249	2	0.24	9.5	3.97	1.11	0.96	1	15.6	13
1	4020	2022-08-25 10:00:34	1	0	24.2215	73	2	male	1	1.7	70	No	Married	1	#NULL!	0	Urinary System	0	0	1	0	1	0	0	0	63.9	1	33.4	#NULL!	9.35	6.33	67.8	125	2	1	4.07	2	38.9	2.44	241	2	0.22	8.9	3.76	1	0.87	1	7.5	10
1	3960	2022-08-25 10:35:53	1	1	18.902	74	2	female	2	1.56	46	No	Married	1	#NULL!	0	Digestive System	0	1	0	0	0	0	0	0	70.2	2	37.9	#NULL!	9.5	3.44	66.6	126	2	1	3.2	1	37.3	1.41	185	2	0.23	12.4	#NULL!	#NULL!	#NULL!	#NULL!	10.9	12
1	3953	2022-08-26 08:25:55	1	0	27.7344	71	2	male	1	1.6	71	No	Married	1	#NULL!	0	Digestive System	0	0	1	0	0	0	0	0	69.7	2	36.9	#NULL!	7.94	5.3	66.7	172	2	1	5.88	2	49	1.72	228	2	0.19	8.4	3.46	1.28	0.83	1	12.9	68
1	4074	2022-08-26 08:54:50	1	1	20.5714	77	3	male	1	1.75	63	No	Married	1	#NULL!	0	Urinary System	0	0	0	0	0	0	0	0	65.6	1	40.8	#NULL!	9.4	3.95	65.5	140	2	1	2968	2	45.3	1.58	134	2	0.19	14.1	#NULL!	#NULL!	#NULL!	#NULL!	14.1	6
1	4031	2022-08-26 09:32:16	1	0	22.8928	73	2	female	2	1.55	55	No	Married	1	#NULL!	0	Respiratory System	0	1	0	0	0	0	0	0	56.1	1	32.9	#NULL!	5.88	3.26	55.4	128	2	1	4.53	2	39.9	1.89	233	2	0.27	11.6	4.07	1.29	1.23	0	7	17
1	3919	2022-08-26 10:02:12	1	0	20.8117	76	3	female	2	1.55	50	No	Married	1	#NULL!	0	Respiratory System	4	0	0	0	0	0	0	0	75.1	2	39.8	#NULL!	6.79	4.73	69.6	116	1	2	3.74	1	35.1	1.41	207	2	0.22	10.7	#NULL!	#NULL!	#NULL!	#NULL!	10.2	319
1	3903	2022-08-26 11:33:24	1	1	17.5771	75	2	male	1	1.72	52	No	Married	1	#NULL!	0	Digestive System	0	0	0	0	0	1	0	0	59.1	1	33.7	108	2.04	1.66	81.3	151	2	2	4.48	2	44	0.25	186	2	0.19	10	#NULL!	#NULL!	#NULL!	#NULL!	6.6	12
1	3910	2022-08-26 11:33:24	2	0	23.833	74	2	female	2	1.56	58	No	Married	1	#NULL!	0	Digestive System	0	0	0	0	0	0	0	0	74.3	2	41.5	#NULL!	2.3	2.96	53.4	135	2	1	1.1	1	40	2.02	315	3	0.26	8.1	4.48	1.6	0.99	1	14	50
1	4056	2022-08-27 07:40:57	1	1	18.3655	68	1	male	1	1.65	50	No	Married	1	#NULL!	0	Respiratory System	0	0	0	1	0	0	0	0	67.5	1	29.6	#NULL!	11.61	9.72	83.7	85	1	2	2.96	1	25.8	1.21	246	2	0.23	9.4	3.07	0.64	0.77	1	5.8	9
1	3981	2022-08-27 08:14:05	2	0	32.8567	66	1	female	2	1.47	71	No	Married	1	#NULL!	0	Reproductive System	4	0	0	0	0	0	0	0	81.4	2	46.7	#NULL!	4.52	3.07	67.9	121	2	1	4.81	2	37.4	1.15	203	2	0.18	8.9	#NULL!	#NULL!	#NULL!	#NULL!	7.4	22
1	4022	2022-08-27 08:28:07	1	0	20.9566	70	1	female	2	1.56	51	No	Married	1	#NULL!	0	Respiratory System	4	0	0	0	0	0	0	0	72.7	2	43.2	212	4.15	2.33	56	121	2	1	3.87	1	38.5	1.42	105	2	0.12	14.2	#NULL!	#NULL!	#NULL!	#NULL!	7.7	18
1	4049	2022-08-27 08:28:56	1	0	24.0346	70	1	male	1	1.58	60	No	Married	1	#NULL!	0	Digestive System	0	0	0	0	0	0	0	0	66.5	1	41.8	217	5.99	3.5	58.2	158	2	1	4.9	2	49	1.09	117	2	0.15	12.4	3.96	0.76	1.19	0	20	20
1	4070	2022-08-27 09:17:01	1	0	22.9421	75	2	male	1	1.59	58	No	Other	3	#NULL!	0	Digestive System	4	0	0	1	0	0	0	0	50.6	1	27.2	#NULL!	8	6.28	78.5	125	2	2	3.65	1	35	0.87	38	1	#NULL!	#NULL!	#NULL!	#NULL!	#NULL!	#NULL!	28.2	59
1	4090	2022-08-27 09:27:00	1	0	23.1405	65	1	male	1	1.65	63	No	Married	1	#NULL!	0	Digestive System	0	1	1	0	0	1	0	0	76.4	2	38.5	#NULL!	1096.1	4.91	63.9	159	2	1	35	2	52.1	2.2	214	2	0.18	8.6	4.73	1.12	0.84	1	9.9	12
1	4068	2022-08-27 09:41:45	1	0	20.4382	71	2	male	1	1.67	57	No	Other	3	#NULL!	0	Respiratory System	4	1	1	1	0	0	0	0	64.3	1	40.9	#NULL!	5.54	4.43	79.8	134	2	2	4.32	2	39.3	0.53	111	2	0.09	7.9	#NULL!	#NULL!	#NULL!	#NULL!	15	12
1	4063	2022-08-27 09:42:20	1	0	23.8751	70	1	male	1	1.65	65	No	Married	1	#NULL!	0	Respiratory System	4	0	0	0	0	0	0	0	66.5	1	34.5	#NULL!	6.3	5.46	71.5	121	2	2	3.8	1	38.4	1.46	220	2	0.2	9.1	#NULL!	#NULL!	#NULL!	#NULL!	8.3	32
1	3924	2022-08-28 09:44:54	1	0	22.83	68	1	female	2	1.45	48	No	Married	1	#NULL!	0	Respiratory System	0	0	0	1	0	0	0	0	76	2	43.1	160	6.27	3.13	49.9	150	2	1	5.11	2	44.5	2.67	359	3	0.33	9.2	5.29	1.04	1.11	#NULL!	8.5	19
1	4088	2022-08-28 09:47:21	1	0	20.7612	74	2	male	1	1.7	60	No	Married	1	#NULL!	0	Digestive System	0	1	0	0	0	0	0	0	72.7	2	42.8	#NULL!	4.58	2.65	57.9	136	2	1	3.96	1	41.2	1.38	117	2	0.1	8.5	#NULL!	#NULL!	#NULL!	#NULL!	20.2	34
1	3979	2022-08-29 08:22:12	1	0	23.0469	86	5	female	2	1.6	59	No	Other	3	#NULL!	0	Respiratory System	0	0	1	0	1	0	0	0	70	2	43.4	#NULL!	5.82	3.61	61.8	140	2	1	4.39	2	42.7	1.82	164	2	0.15	9.1	3	0.68	1.04	1	25.3	18
1	4059	2022-08-29 09:00:10	1	0	23.4375	82	4	female	2	1.6	60	No	Widowed	0	#NULL!	0	Digestive System	0	0	1	0	0	0	0	0	72.5	2	39.3	#NULL!	5.67	1.32	23.3	115	1	1	3.42	1	35.8	3.74	233	2	0.21	9	3.38	1.65	0.79	1	6.7	18
1	4061	2022-08-29 09:13:15	1	0	26.9531	65	1	female	2	1.6	69	No	Other	3	#NULL!	0	Respiratory System	0	0	0	0	0	0	0	0	71.8	2	40.7	#NULL!	7.19	4.37	60.6	128	2	1	3.99	1	37.8	2.4	260	2	0.21	8.2	5.42	1.95	1.24	#NULL!	5.5	15
1	3843	2022-08-29 09:48:44	1	0	23.833	66	1	female	2	1.56	58	No	Married	1	#NULL!	0	Endocrine System	4	0	0	0	0	0	0	0	75.8	2	43.1	#NULL!	6.09	2.26	37.2	150	2	1	4.79	2	44	2.49	258	2	0.23	9.1	4.37	0.54	1.31	0	5.6	15
1	4025	2022-08-29 14:37:13	1	1	19.025	73	2	female	2	1.45	40	No	Married	1	#NULL!	0	Respiratory System	0	0	0	0	0	0	0	0	69.1	2	43.4	#NULL!	3.52	2.21	62.5	137	2	1	4.58	2	43.7	0.99	123	2	0.17	14.1	4.71	1.57	1.5	0	10.1	15
1	3966	2022-08-30 09:31:26	1	1	#NULL!	69	1	female	2	#NULL!	#NULL!	Yes	Widowed	3	#NULL!	0	Respiratory System	4	0	1	0	0	0	0	0	64.4	1	39.9	#NULL!	4.29	2.32	54.1	116	1	1	3.43	1	36.3	1.35	339	3	0.26	7.7	#NULL!	#NULL!	#NULL!	#NULL!	7.7	19
1	3991	2022-08-30 09:48:38	1	1	#NULL!	87	5	female	2	1.55	#NULL!	Yes	Widowed	0	#NULL!	1	Reproductive System	0	0	0	0	0	1	0	1	58.4	1	30.8	#NULL!	4.01	2.89	72.1	131	2	2	4.21	2	40.6	0.73	196	2	0.21	10.8	#NULL!	#NULL!	#NULL!	#NULL!	11.6	24
1	4011	2022-08-30 10:02:14	1	0	25.2493	67	1	male	1	1.78	80	No	Married	1	#NULL!	0	Digestive System	4	0	1	0	0	1	0	0	69	2	40	150	9.25	7.8	84.3	133	2	2	4.24	2	41.5	1.2	177	2	0.17	9.6	#NULL!	#NULL!	#NULL!	#NULL!	17.1	9
1	4010	2022-08-30 10:42:07	1	0	22.6003	66	1	male	1	1.56	55	No	Married	1	#NULL!	0	Respiratory System	0	0	0	0	0	0	0	0	54	1	27.6	#NULL!	3.33	2.08	62.6	127	2	1	4.26	2	39.7	0.9	237	2	0.24	10.1	3.25	0.52	1.19	0	6.9	13
1	3959	2022-08-30 14:10:18	1	0	20.7612	66	1	male	1	1.7	60	No	Married	1	#NULL!	0	Respiratory System	4	0	0	0	0	0	0	0	61.7	1	38.7	#NULL!	3.62	2.43	66.9	119	1	1	3.82	1	37.3	0.84	108	2	0.1	9.4	5.22	0.76	1.51	#NULL!	6.9	26
1	4044	2022-08-31 08:47:39	1	1	17.7832	80	3	male	1	1.71	52	No	Married	1	#NULL!	0	Respiratory System	0	0	1	0	1	0	0	0	66.9	1	43.5	251	3.8	2.91	60.5	133	2	1	1.3	1	40.2	1.53	116	2	0.14	12	4.31	1.02	1.74	0	8.7	39
1	4121	2022-08-31 10:35:31	2	0	21.3675	71	2	male	1	1.56	52	No	Married	1	#NULL!	0	Other	4	0	1	0	0	0	0	0	67.2	1	36.1	#NULL!	6.88	4.89	71	97	1	2	3.23	1	27.8	1.17	304	3	0.31	10.1	#NULL!	#NULL!	#NULL!	#NULL!	197.8	73
1	4126	2022-09-01 08:53:16	2	0	24.8016	67	1	male	1	1.68	70	No	Married	1	#NULL!	0	Digestive System	0	0	0	0	0	0	0	0	67	1	39.6	#NULL!	4.88	2.23	45.7	142	2	1	4.31	2	43.6	2.03	247	2	0.22	9	5.31	2.25	1.12	#NULL!	5.9	18
1	3988	2022-09-01 10:36:43	1	0	24.6094	74	2	male	1	1.6	63	No	Married	1	#NULL!	0	Digestive System	0	1	0	0	0	0	0	0	68.7	2	42.3	#NULL!	6.21	3.79	61.2	144	2	1	4.69	2	44.9	1.92	178	2	0.2	11.3	5.65	1.37	1.23	#NULL!	8	9
1	4149	2022-09-01 11:02:10	1	0	23.5556	73	2	female	2	1.5	53	No	Married	1	#NULL!	0	Other	0	1	0	0	0	0	0	0	56.4	1	34	#NULL!	5.19	2.34	45	129	2	1	4.24	2	41.9	2.14	212	2	0.18	8.6	#NULL!	#NULL!	#NULL!	#NULL!	7.6	16
1	3984	2022-09-01 11:32:00	1	1	18.424	71	2	male	1	1.68	52	No	Married	1	#NULL!	0	Urinary System	0	0	0	0	0	1	0	0	65.6	1	39.2	#NULL!	6.21	4.54	73.1	111	1	2	5.98	2	37.7	1.07	135	2	0.14	10.2	#NULL!	#NULL!	#NULL!	#NULL!	10.1	12
1	3985	2022-09-01 14:45:00	2	1	16.1843	74	2	male	1	1.63	43	No	Married	1	#NULL!	0	Digestive System	0	1	0	0	0	0	0	0	60.8	1	34.8	#NULL!	6.77	5.15	76.1	141	2	2	4.13	2	39.8	1.18	302	3	0.34	11.3	4.35	11.28	0.88	1	15	14
1	4158	2022-09-02 07:44:10	2	1	17.5781	71	2	male	1	1.6	45	No	Married	1	#NULL!	0	Respiratory System	0	0	1	0	0	0	0	0	63.5	1	36.7	222	5.54	3.72	67.3	115	1	1	3.85	1	36.9	1.29	240	2	0.22	9.1	4.27	0.57	1.2	0	4.9	15
1	4147	2022-09-02 09:30:00	2	1	19.2234	74	2	female	2	1.53	45	No	Married	1	#NULL!	0	Digestive System	0	1	0	0	0	0	0	0	74.6	2	47	#NULL!	6.11	4.1	67.1	142	2	1	4.63	2	43.6	1.81	169	2	0.16	9.3	5.48	0.7	1.86	#NULL!	12.9	17
1	4091	2022-09-02 10:02:32	1	0	25.7778	65	1	female	2	1.5	58	No	Married	1	#NULL!	0	Digestive System	0	1	1	1	0	0	0	0	68.6	2	40.1	#NULL!	3.52	2.3	65.2	108	1	1	3.69	1	34.9	0.94	126	2	0.1	8.1	#NULL!	#NULL!	#NULL!	#NULL!	6.8	9
1	4122	2022-09-03 09:00:57	1	0	21.5139	66	1	male	1	1.67	60	No	Married	1	#NULL!	0	Respiratory System	4	0	0	0	0	0	0	0	68.9	2	43	#NULL!	6.09	4.26	69.9	141	2	2	4.53	2	44.5	1.28	107	2	0.1	9.1	#NULL!	#NULL!	#NULL!	#NULL!	10.2	37
1	4012	2022-09-03 10:05:52	1	0	23.4236	85	4	female	2	1.64	63	No	Widowed	0	#NULL!	0	Reproductive System	0	0	1	1	0	1	0	0	61.5	1	35	#NULL!	5.45	2.81	51.6	124	2	1	3.99	1	38.4	2.1	253	2	0.24	9.4	3.33	1.79	1.14	1	13	8
1	4139	2022-09-03 10:08:44	1	1	19.721	71	2	male	1	1.67	55	No	Married	1	#NULL!	0	Respiratory System	4	1	1	1	0	0	0	0	57.3	1	34.2	#NULL!	3.13	2.9	92.9	113	1	2	3.67	1	32.1	0.13	82	1	0.07	8.4	3.67	1.24	1.31	0	13.8	9
1	4129	2022-09-04 09:16:44	1	1	18.9181	66	1	female	2	1.49	42	No	Unmarried	#NULL!	#NULL!	0	Digestive System	0	1	0	0	0	0	0	0	64.1	1	41.5	#NULL!	11.5	1.31	40.9	93	1	1	17.2	2	30.5	1.2	148	2	0.13	8.6	4.9	1.2	2.34	0	10.6	17
1	3982	2022-09-04 10:14:43	2	0	21.4844	79	3	female	2	1.6	55	No	Married	1	#NULL!	0	Digestive System	0	1	0	0	0	0	0	0	68.3	2	33.2	#NULL!	6.91	4.46	64.5	124	2	1	4.51	2	39	2.03	211	2	0.2	9.4	#NULL!	#NULL!	#NULL!	#NULL!	12.9	4
1	4153	2022-09-04 14:20:04	1	0	22.0604	68	1	female	2	1.55	53	No	Married	1	#NULL!	0	Respiratory System	4	1	1	0	0	0	0	0	70.3	2	37.5	#NULL!	6.35	4.92	77.4	122	2	2	3.92	1	38	1.25	213	2	0.2	9.3	#NULL!	#NULL!	#NULL!	#NULL!	8.1	46
1	4127	2022-09-05 08:56:14	2	0	22.9421	75	2	male	1	1.59	58	No	Other	3	#NULL!	0	Digestive System	4	0	0	1	0	0	0	0	47.3	1	26.4	#NULL!	11.52	10.18	88.3	124	2	2	3.63	1	35	0.85	55	1	0.06	10.6	#NULL!	#NULL!	#NULL!	#NULL!	47.7	42
1	4118	2022-09-05 09:29:57	1	0	24.0346	75	2	female	2	1.58	60	No	Married	1	#NULL!	0	Reproductive System	0	1	1	0	0	0	0	0	74.4	2	44.4	#NULL!	9.7	#NULL!	#NULL!	#NULL!	2	#NULL!	4.9	2	#NULL!	#NULL!	#NULL!	2	#NULL!	#NULL!	#NULL!	#NULL!	#NULL!	#NULL!	16.5	20
1	4032	2022-09-05 10:22:04	1	0	23.6652	69	1	male	1	1.67	66	No	Married	1	#NULL!	0	Digestive System	4	0	0	0	0	0	0	1	60.3	1	26.3	#NULL!	3.03	2.48	81.9	183	2	2	5.57	2	52.7	0.33	135	2	0.15	11	#NULL!	#NULL!	#NULL!	#NULL!	93.4	41
1	3989	2022-09-05 11:04:00	1	1	#NULL!	82	4	female	2	#NULL!	#NULL!	Yes	Widowed	0	#NULL!	0	Digestive System	0	0	1	0	0	1	0	0	60.1	1	32.9	191	3.93	2.71	68.9	127	2	1	4.12	2	39	0.94	218	2	0.22	10	7.22	1.32	1.36	#NULL!	2.6	3
1	3932	2022-09-06 10:27:23	1	1	17.301	68	1	male	1	1.7	50	No	Married	1	#NULL!	0	Digestive System	0	0	0	0	1	0	0	0	66.9	1	39.2	#NULL!	7.41	3.8	51.3	140	2	1	4.4	2	42.5	3.05	191	2	0.19	9.8	5.83	1.07	1.37	#NULL!	3.8	12
1	4154	2022-09-07 08:37:25	2	1	19.8839	70	1	male	1	1.78	63	No	Married	1	#NULL!	0	Reproductive System	0	0	1	1	0	0	0	0	67	1	37.9	#NULL!	8.22	6.79	82.6	136	2	2	4.37	2	42.1	1.11	254	2	0.22	8.7	5.43	0.74	1.13	#NULL!	5.5	8
1	4119	2022-09-07 09:01:34	1	1	17.3484	74	2	female	2	1.48	38	No	Widowed	0	#NULL!	0	Reproductive System	4	0	0	0	0	0	0	1	58.1	1	24.7	171	3.56	2.46	69.3	98	1	1	3.04	1	30.8	0.79	120	2	0.1	8.4	5.43	2.24	0.98	#NULL!	7.3	11
1	4137	2022-09-08 08:34:46	1	0	31.2175	68	1	female	2	1.55	75	No	Married	1	#NULL!	0	Respiratory system	0	0	1	1	1	0	0	0	60.1	1	34.3	#NULL!	4.16	2.5	60.4	108	1	1	4.07	2	35.2	1.26	183	2	0.18	10.1	3.08	1	0.96	1	5.9	21
1	4152	2022-09-08 08:44:44	1	0	22.9874	66	1	female	2	1.46	49	No	Married	1	#NULL!	0	Respiratory system	0	0	0	0	0	0	0	0	71.4	2	42.7	#NULL!	6.58	3.9	59.3	134	2	1	4.35	2	42.2	2.29	187	2	0.22	11.9	#NULL!	#NULL!	#NULL!	#NULL!	6.1	46
1	4105	2022-09-08 08:47:45	1	0	26.0375	70	1	female	2	1.58	65	No	Married	1	#NULL!	0	Reproductive System	0	1	0	0	0	0	0	0	78.8	2	41.5	#NULL!	5.98	4.29	71.7	126	2	2	4.19	2	40.4	1.05	141	2	0.19	13.5	#NULL!	#NULL!	#NULL!	#NULL!	9.8	26
1	4160	2022-09-08 09:12:25	1	0	24.1415	66	1	female	2	1.55	58	No	Widowed	1	#NULL!	0	Reproductive System	4	0	1	0	0	1	0	0	52.1	1	25.7	#NULL!	0.26	0.06	23.1	71	1	1	2.36	1	20	0.06	146	2	0.14	9.6	#NULL!	#NULL!	#NULL!	#NULL!	11.1	33
1	4233	2022-09-09 08:28:21	1	1	20.0155	89	5	male	1	1.76	62	No	Widowed	0	#NULL!	0	Digestive system	4	0	1	1	1	0	0	0	81.7	2	46.2	#NULL!	12.39	9.51	76.6	150	2	2	5.22	2	46.6	2.3	181	2	0.16	8.8	#NULL!	#NULL!	#NULL!	#NULL!	13.2	12
1	4106	2022-09-09 09:00:34	1	1	19.7239	79	3	male	1	1.56	48	No	Married	1	#NULL!	0	Respiratory System	0	0	1	0	0	0	0	0	63.4	1	32.7	136	7.19	6.27	87.3	153	2	2	4.87	2	45	0.57	180	2	0.2	10.8	3.37	0.89	0.91	1	8.9	11
1	4232	2022-09-09 09:05:29	1	0	21.4844	67	1	female	2	1.6	55	No	Married	1	#NULL!	0	Respiratory System	0	0	0	0	0	0	0	0	77.7	2	44.8	#NULL!	78.7	3	47	135	2	1	47.6	2	43.3	2.92	388	3	0.33	8.4	6.96	1.86	1.69	#NULL!	7.2	18
1	4239	2022-09-09 09:17:43	1	1	17.5781	93	5	male	1	1.6	45	No	Married	1	#NULL!	0	Exercise system	0	0	0	0	0	0	0	0	61.1	1	37.2	#NULL!	8.26	5.05	61.1	125	2	1	4.07	2	40.3	2.15	181	2	0.18	9.8	#NULL!	#NULL!	#NULL!	#NULL!	12.5	15
1	4151	2022-09-09 09:53:57	2	0	24.4444	67	1	female	2	1.5	55	No	Married	1	#NULL!	0	Respiratory System	0	0	0	0	0	0	0	0	71.3	2	43.6	#NULL!	4.51	2.74	60.6	132	2	1	4.21	2	40.5	1.37	256	2	0.19	7.4	5.38	1.26	1.13	#NULL!	6	22
1	4216	2022-09-09 10:32:06	1	1	17.9931	82	4	male	1	1.7	52	No	Married	1	#NULL!	0	Reproductive System	0	0	1	0	0	0	0	0	61.5	1	35	#NULL!	6.22	4.2	67.7	104	1	1	3.52	1	32.5	1.61	256	2	0.22	8.4	#NULL!	#NULL!	#NULL!	#NULL!	11.4	11
1	4026	2022-09-09 10:51:38	2	0	24.1415	68	1	female	2	1.55	58	No	Married	1	#NULL!	0	Respiratory System	4	0	1	0	1	0	0	0	69.1	2	39.5	#NULL!	5.5	4.03	73.1	185	2	2	6.58	2	61	0.98	265	2	0.26	9.9	5.34	1.38	0.98	#NULL!	14.2	14
1	4138	2022-09-09 10:59:37	1	1	20.4444	66	1	female	2	1.5	46	No	Married	1	#NULL!	0	Digestive System	4	1	0	0	0	0	0	0	77.9	2	41.9	#NULL!	3.14	1.38	44	126	2	1	4.08	2	40.1	1.37	274	2	0.19	6.8	#NULL!	#NULL!	#NULL!	#NULL!	9.5	9
1	4133	2022-09-10 09:49:47	1	1	20.3954	74	2	male	1	1.55	49	No	Married	1	#NULL!	0	Respiratory System	4	0	0	0	0	0	0	0	68.5	2	36.8	#NULL!	4.82	3.28	68.3	121	2	1	4.14	2	38.7	1.11	197	2	0.23	11.5	3.3	0.46	1.27	0	11.1	12
1	4128	2022-09-10 10:46:58	1	1	19.2234	90	5	male	1	1.53	45	No	Married	1	#NULL!	0	Urinary System	0	0	0	0	0	1	0	0	62.1	1	26.8	#NULL!	8.03	6.96	86.6	120	1	2	4.2	2	37.9	0.44	321	3	0.26	8.2	#NULL!	#NULL!	#NULL!	#NULL!	5.3	11
1	4054	2022-09-10 11:18:29	1	1	18.8707	94	5	male	1	1.66	52	No	Other	3	#NULL!	0	Respiratory System	4	0	0	0	0	1	0	0	59.2	1	34.5	121	6.38	3.82	59.9	139	2	1	4.45	2	41.1	1.8	252	2	0.25	9.9	#NULL!	#NULL!	#NULL!	#NULL!	25.3	6
1	3964	2022-09-11 01:25:00	1	0	22.8374	79	3	male	1	1.7	66	No	Married	1	#NULL!	0	Respiratory System	4	1	0	0	1	0	0	0	58.6	1	32.8	#NULL!	7.53	6.6	87.8	50	1	2	1.58	1	17	0.43	91	1	0.09	9.5	#NULL!	#NULL!	#NULL!	#NULL!	44.3	8
1	4141	2022-09-11 09:32:39	1	0	22.0741	65	1	female	2	1.52	51	No	Married	1	#NULL!	0	Digestive System	4	0	1	1	1	0	0	0	61.5	1	35.1	#NULL!	2.32	0.94	40.7	87	1	1	3.58	1	26.8	0.9	178	2	0.16	9.2	#NULL!	#NULL!	#NULL!	#NULL!	7	15
1	4095	2022-09-11 11:35:42	1	1	17.9817	88	5	female	2	1.51	41	No	Married	1	#NULL!	0	Digestive System	0	0	1	0	1	0	0	1	56.4	1	24.1	105.5	2.98	1.77	59.7	76	1	1	3.07	1	23.6	0.93	211	2	0.19	8.8	3.72	0.87	1	1	8.9	8
1	4244	2022-09-12 09:24:28	2	1	16.609	90	5	male	1	1.7	48	No	Married	1	#NULL!	0	Reproductive System	0	0	1	1	1	0	0	0	55.8	1	32.4	#NULL!	12.31	10.33	84	123	2	2	3.97	1	37.3	0.77	140	2	0.16	11.4	2.63	0.75	1.14	1	36.6	12
1	3987	2022-09-13 09:25:40	2	1	21.3039	76	3	male	1	1.65	58	No	Married	1	#NULL!	0	Digestive System	4	0	0	0	0	0	0	0	53.9	1	30.5	#NULL!	4.48	2	44.5	92	1	1	3.12	1	29.3	1.97	177	2	0.2	11.4	#NULL!	#NULL!	#NULL!	#NULL!	5.9	20
1	4060	2022-09-13 09:30:03	1	0	20.83	70	1	female	2	1.58	52	No	Married	1	#NULL!	0	Digestive System	0	1	0	0	0	0	0	0	67.9	1	40.3	#NULL!	80.6	3.2	62.1	132	2	1	5	2	38.2	1.46	242	2	0.25	10.3	6.01	5.54	0.95	#NULL!	7	15
1	4144	2022-09-13 15:17:08	1	1	18.5911	83	4	male	1	1.72	55	No	Married	1	#NULL!	0	Digestive System	0	0	0	1	0	1	0	0	52.5	1	23.6	78	13.61	12.5	91.9	107	1	2	3.12	1	30.3	0.28	155	2	0.12	7.7	#NULL!	#NULL!	#NULL!	#NULL!	112.4	196
1	4177	2022-09-14 09:59:51	2	0	21.0828	93	5	female	2	1.54	50	No	Widowed	0	#NULL!	0	Digestive System	0	0	1	0	0	0	0	0	66.1	1	39.9	#NULL!	4.23	2.62	62	156	2	1	4.54	2	47	1	142	2	0.14	9.9	3.52	0.61	1.15	1	14.2	25
1	4215	2022-09-15 08:57:22	1	0	21.4533	74	2	male	1	1.7	62	No	Married	1	#NULL!	0	Digestive System	0	0	0	1	0	0	0	0	79.2	2	46.8	#NULL!	6.86	4.57	66.6	143	2	1	3.97	1	41.4	1.78	150	2	0.13	8.4	#NULL!	#NULL!	#NULL!	#NULL!	18.6	30
1	4156	2022-09-15 08:57:44	2	1	22.4913	74	2	male	1	1.7	65	No	Married	1	#NULL!	0	Other	0	0	1	1	0	1	0	0	63.8	1	32.7	142	10.1	8.04	79.5	112	1	2	3.87	1	34.3	1.01	215	2	0.2	9.4	4.51	2.76	0.54	1	6.4	53
1	4209	2022-09-15 09:27:40	1	1	19.9594	79	3	male	1	1.66	55	No	Married	1	#NULL!	0	Reproductive System	0	0	0	0	0	0	0	0	61.3	1	33.3	#NULL!	7.27	5.68	78.1	149	2	2	4.8	2	46.1	0.96	156	2	0.16	10.4	#NULL!	#NULL!	#NULL!	#NULL!	20.8	10
1	4073	2022-09-15 10:04:10	1	0	23.8754	73	2	male	1	1.7	69	No	Widowed	1	#NULL!	0	Reproductive System	0	0	0	1	0	0	0	0	73.5	2	42.3	#NULL!	6.37	2.56	40.2	159	2	1	5.04	2	47.4	3.03	165	2	0.16	9.6	#NULL!	#NULL!	#NULL!	#NULL!	11.7	18
1	4242	2022-09-15 14:43:42	1	1	16.4444	82	4	female	2	1.5	37	No	Widowed	0	#NULL!	0	Respiratory System	4	0	0	0	0	0	0	0	66.6	1	32.7	117	13.05	10.85	83.1	96	1	2	3.37	1	30.9	1.05	483	3	0.35	7.2	4.04	0.78	1.34	0	6.8	15
1	4016	2022-09-16 11:24:03	2	0	21.4844	78	3	female	2	1.6	55	No	Married	1	#NULL!	0	Urinary System	0	0	0	0	0	1	0	0	63.6	1	36.7	#NULL!	6.04	4.23	70.2	128	2	1	4.28	2	39.6	1.45	239	2	0.21	8.8	#NULL!	#NULL!	#NULL!	#NULL!	7	11
1	4235	2022-09-17 08:41:25	1	0	28.3737	69	1	male	1	1.7	82	No	Married	1	#NULL!	0	Respiratory System	4	0	1	0	1	0	0	0	77.4	2	41	280	5.09	2.99	58.8	140	2	1	3.95	1	43.2	1.58	185	2	0.16	8.4	2.91	1.56	1.17	0	6.9	25
1	4194	2022-09-17 08:46:43	1	0	21.3675	69	1	female	2	1.56	52	No	Married	1	#NULL!	0	Digestive System	4	0	1	0	0	0	0	0	68.9	2	35.5	#NULL!	3.56	2.08	58.4	118	1	1	3.8	1	37.7	0.97	166	2	0.17	10	#NULL!	#NULL!	#NULL!	#NULL!	12.3	6
1	4053	2022-09-17 09:53:50	1	0	22.8571	74	2	male	1	1.75	70	No	Married	1	#NULL!	0	Digestive System	0	0	1	0	0	1	0	0	59.8	1	37.6	#NULL!	8.41	6.18	73.4	154	2	2	4.73	2	40.8	1.14	157	2	0.17	10.7	#NULL!	#NULL!	#NULL!	#NULL!	20.3	14
1	4240	2022-09-17 11:34:20	1	0	24.6097	70	1	male	1	1.65	67	No	Married	1	#NULL!	0	Respiratory System	4	0	0	0	0	0	0	0	75.4	2	40	#NULL!	5.35	3.27	61.2	128	2	1	4.39	2	40.4	1.66	233	2	0.2	8.5	4.59	0.91	1.38	0	6.8	37
1	4046	2022-09-17 12:19:13	1	0	23.7088	69	1	female	2	1.53	55.5	No	Other	3	#NULL!	0	Digestive System	0	0	1	0	0	0	0	0	70.9	2	42.2	#NULL!	5.66	3.54	62.5	142	2	1	4.68	2	44.5	1.77	148	2	0.16	10.8	5.24	1.17	1.31	#NULL!	12.2	15
1	4193	2022-09-18 08:45:34	1	0	22.2222	81	4	female	2	1.5	50	No	Widowed	0	#NULL!	0	Digestive System	4	0	1	0	0	0	0	0	70.5	2	38.3	#NULL!	6.09	4.89	80.2	104	1	2	3.66	1	32.6	0.8	228	2	0.18	8	#NULL!	#NULL!	#NULL!	#NULL!	11.3	13
1	4208	2022-09-18 09:01:56	2	0	25.7117	74	2	male	1	1.65	70	No	Married	1	#NULL!	0	Reproductive System	0	1	1	0	0	0	0	0	66.6	1	38.3	#NULL!	3.8	2.7	48.3	139	2	1	0	2	42.4	2.19	152	2	0.14	9.2	5.32	3.08	0.92	#NULL!	20.3	37
1	4310	2022-09-18 09:05:50	1	0	24.0346	70	1	male	1	1.58	60	No	Married	1	#NULL!	0	Digestive System	0	0	0	0	0	0	0	0	65.9	1	42.4	#NULL!	7.14	3.33	46.6	157	2	1	4.75	2	47.5	1.15	102	2	0.13	12.7	#NULL!	#NULL!	#NULL!	#NULL!	17	21
1	4223	2022-09-19 09:01:27	1	0	33.3195	66	1	female	2	1.47	72	No	Married	1	#NULL!	0	Reproductive system	4	0	0	0	0	0	0	0	82	2	47	#NULL!	4.31	2.24	52.1	129	2	1	5.21	2	41	1.72	227	2	0.2	8.9	#NULL!	#NULL!	#NULL!	#NULL!	8.6	30
1	4117	2022-09-19 10:11:23	1	1	16.4062	66	1	male	1	1.6	42	No	Married	1	#NULL!	0	Digestive System	0	1	0	0	0	1	0	0	61.9	1	29.9	#NULL!	5.37	4.17	77.6	88	1	2	3.02	1	27.3	0.66	174	2	0.2	11.5	#NULL!	#NULL!	#NULL!	#NULL!	29.3	10
1	4213	2022-09-20 07:54:06	2	0	25.8166	75	2	male	1	1.67	72	No	Married	1	#NULL!	0	Respiratory System	4	0	0	0	1	1	0	0	65.3	1	38.4	#NULL!	4.79	2.76	57.6	123	2	1	3.92	1	36	0.99	212	2	0.19	8.9	6.78	6.63	0.71	#NULL!	2.4	62
1	4414	2022-09-20 08:35:27	1	0	25.5937	78	3	male	1	1.63	68	No	Married	1	#NULL!	0	Respiratory System	4	0	1	0	1	1	0	0	74.4	2	38.6	#NULL!	6.38	4.09	64.2	189	2	1	5.75	2	57	1.77	249	2	0.26	10.3	#NULL!	#NULL!	#NULL!	#NULL!	16	13
1	4199	2022-09-20 09:13:58	1	0	21.1553	69	1	female	2	1.67	59	No	Married	1	#NULL!	0	Reproductive System	0	0	0	0	0	0	0	0	66	1	38	#NULL!	24	2.7	71.5	119	1	2	2.4	1	37.5	0.69	77	1	0.11	14.6	#NULL!	#NULL!	#NULL!	#NULL!	11.8	24
1	4259	2022-09-20 09:19:23	1	0	20.7612	74	2	male	1	1.7	60	No	Married	1	#NULL!	0	Digestive system	0	1	0	0	0	0	0	0	74.5	2	41.9	#NULL!	4.62	2.67	57.8	139	2	1	3.95	1	41.9	1.31	106	2	0.09	8.3	#NULL!	#NULL!	#NULL!	#NULL!	15.1	23
1	4204	2022-09-20 10:24:40	1	1	19.052	66	1	female	2	1.62	50	No	Married	1	#NULL!	0	Reproductive	0	0	1	0	0	1	0	0	84.8	2	42.9	#NULL!	5.44	3.29	60.2	116	1	1	4.29	2	37.9	1.57	248	2	0.22	8.7	#NULL!	#NULL!	#NULL!	#NULL!	7.1	14
1	4226	2022-09-20 10:28:30	1	1	19.5556	84	4	female	2	1.5	44	No	Married	1	#NULL!	0	Other	0	0	1	0	1	1	0	0	57	1	34.3	#NULL!	5.3	3.4	64.1	144	2	1	4.23	2	39	1.16	258	2	0.25	9.7	5.42	0.85	1.56	#NULL!	3	16
1	4179	2022-09-20 11:32:09	2	1	18.5568	71	2	male	1	1.69	53	No	Married	1	#NULL!	0	Respiratory System	0	0	0	1	0	0	0	0	56.1	1	35.2	#NULL!	6.45	5.29	82.1	144	2	2	4.61	2	45.2	0.76	68	1	0.08	11.9	#NULL!	#NULL!	#NULL!	#NULL!	16	20
1	4241	2022-09-20 11:49:33	2	0	20.8117	76	3	female	2	1.55	50	No	Married	1	#NULL!	0	Respiratory System	4	0	0	0	0	0	0	0	79.7	2	38.9	#NULL!	3.59	2.11	58.6	118	1	1	3.72	1	37.4	1.19	153	2	0.15	9.9	4.41	1.29	1.54	0	6.5	64
1	4212	2022-09-21 08:57:59	1	1	15.3894	82	4	male	1	1.71	45	No	Other	3	#NULL!	0	Digestive System	0	0	1	0	1	0	0	0	64	1	34.6	#NULL!	7.13	5.09	71.4	134	2	2	4.19	2	45	1.28	134	2	0.12	9.1	#NULL!	#NULL!	#NULL!	#NULL!	13.6	13
1	3955	2022-09-21 10:45:24	2	0	21.4536	72	2	male	1	1.63	57	No	Married	1	#NULL!	0	Skin & Appendages	4	0	0	0	0	0	0	0	70.5	2	42.4	#NULL!	6.56	4.83	73.7	155	2	2	4.79	2	46.6	1.45	144	2	0.18	12.4	#NULL!	#NULL!	#NULL!	#NULL!	11.4	47
1	4037	2022-09-21 11:24:58	2	1	19.5312	75	2	female	2	1.6	50	No	Married	1	#NULL!	0	Digestive System	4	0	0	0	0	0	0	1	73.7	2	44.1	124	10.9	9	82.5	144	2	2	4.7	2	45.6	1.31	212	2	0.24	11.2	5.7	1.3	1.5	#NULL!	10.1	15
1	4272	2022-09-22 09:06:37	2	0	21.6128	80	3	male	1	1.68	61	No	Married	1	#NULL!	0	Blood System	4	0	1	0	0	0	0	0	54.7	1	33.3	#NULL!	5.25	3.86	73.3	112	1	2	4.54	2	33.2	0.35	194	2	0.19	9.6	#NULL!	#NULL!	#NULL!	#NULL!	23	33
1	4374	2022-09-22 09:22:32	1	0	20.9572	67	1	male	1	1.62	55	No	Married	1	#NULL!	0	Respiratory System	4	0	0	0	0	0	0	0	78.9	2	43.8	250	6.28	3.3	52.6	158	2	1	5.22	2	48.4	2.34	162	2	0.18	10.9	11.65	0.94	2.79	#NULL!	5.6	51
1	4418	2022-09-22 09:25:27	1	0	20.5499	75	2	male	1	1.68	58	No	Married	1	#NULL!	0	Respiratory System	0	0	1	0	0	0	0	0	59.5	1	31.4	#NULL!	5.91	4.21	71.2	112	1	2	3.75	1	36	0.99	235	2	0.21	9	3.33	0.48	1.02	1	4.9	24
1	4342	2022-09-23 08:47:36	1	0	23.3091	69	1	female	2	1.55	56	No	Married	1	#NULL!	0	Respiratory System	4	1	1	0	0	0	0	0	61.7	1	37.7	#NULL!	3.96	2.24	56.4	105	1	1	3.01	1	32.6	1.02	213	2	0.18	8.3	#NULL!	#NULL!	#NULL!	#NULL!	4.4	23
1	4285	2022-09-23 09:42:48	1	0	26.9357	65	1	female	2	1.48	59	No	Married	1	#NULL!	0	Digestive System	0	1	1	1	0	0	0	0	71.1	2	40.8	#NULL!	3.3	1.87	56.7	115	1	1	3.86	1	36.9	1.09	133	2	0.11	8	#NULL!	#NULL!	#NULL!	#NULL!	6.5	16
1	4237	2022-09-23 09:57:53	1	1	27.0552	74	2	female	2	1.55	65	No	Married	1	#NULL!	0	Reproductive System	0	0	1	0	1	0	0	0	72.8	2	40.9	#NULL!	7.44	4.31	57.9	147	2	1	4.85	2	45.6	2.61	164	2	0.16	9.6	2.91	1.05	1.06	1	15	16
1	4299	2022-09-23 10:00:08	1	1	20.0692	70	1	male	1	1.7	58	No	Married	1	#NULL!	0	Respiratory System	4	0	0	0	0	0	0	0	68.2	2	37.8	#NULL!	8.64	5.69	65.8	107	1	1	3.39	1	32.8	1.76	320	3	0.29	8.9	4.15	1	0.84	1	6.9	9
1	4225	2022-09-23 10:12:10	1	0	24.7252	65	1	male	1	1.73	74	No	Other	3	#NULL!	0	Respiratory System	4	0	0	0	0	0	0	0	64.7	1	40	#NULL!	5.71	4.52	79.1	120	1	2	3.69	1	36.9	0.8	87	1	0.11	12.5	#NULL!	#NULL!	#NULL!	#NULL!	22.6	54
1	4366	2022-09-23 10:13:01	1	1	19.721	71	2	male	1	1.67	55	No	Married	1	#NULL!	0	Respiratory System	4	0	1	1	0	0	0	0	69.4	2	41	#NULL!	1.7	1.59	70.8	103	1	2	5	2	32.4	0.29	97	1	0.08	8.4	#NULL!	#NULL!	#NULL!	#NULL!	11.8	6
1	4355	2022-09-23 16:08:49	1	1	18.2222	77	3	female	2	1.5	41	No	Married	1	#NULL!	0	Respiratory System	0	1	0	0	0	0	0	0	73.4	2	43.4	#NULL!	4.7	2.58	55	135	2	1	4.29	2	41.7	1.53	218	2	0.19	8.8	7.19	3.05	1.39	#NULL!	9.3	16
1	4303	2022-09-24 08:25:17	2	0	22.5896	66	1	male	1	1.67	63	No	Married	1	#NULL!	0	Respiratory system	4	0	0	0	0	0	0	0	70.5	2	43.5	#NULL!	3.2	4.62	69.2	146	2	1	3.2	1	44.8	1.5	130	2	0.13	10	6.8	1.69	1.45	#NULL!	11.4	35
1	4307	2022-09-24 08:49:18	2	1	17.1468	82	4	male	1	1.62	45	No	Married	1	#NULL!	0	Respiratory System	4	0	0	1	0	0	0	0	76.8	2	26.6	#NULL!	11.31	9.76	86.2	118	1	2	4.4	2	37.9	0.89	482	3	0.58	12.1	#NULL!	#NULL!	#NULL!	#NULL!	10.4	14
1	4326	2022-09-24 08:51:08	2	1	18.3594	66	1	female	2	1.6	47	No	Widowed	0	#NULL!	1	Digestive System	4	0	0	0	0	1	0	0	48.2	1	25	#NULL!	4.98	4.1	82.2	83	1	2	3.37	1	28.1	0.62	226	2	0.2	9	#NULL!	#NULL!	#NULL!	#NULL!	3.3	33
1	4318	2022-09-24 15:41:39	2	1	19.0677	72	2	female	2	1.57	47	No	Married	1	#NULL!	0	Reproductive System	0	0	0	0	0	0	0	0	77.3	2	41.9	#NULL!	3.04	1.77	58.3	142	2	1	4.59	2	41.1	1.11	181	2	0.18	9.7	#NULL!	#NULL!	#NULL!	#NULL!	11.2	17
1	4273	2022-09-25 09:16:18	1	0	24.2188	74	2	male	1	1.6	62	No	Married	1	#NULL!	0	Digestive System	0	0	0	0	0	0	0	0	69.9	2	40.6	#NULL!	3.2	#NULL!	#NULL!	#NULL!	2	#NULL!	22.9	2	#NULL!	#NULL!	#NULL!	2	#NULL!	#NULL!	5.86	1.39	1.4	#NULL!	9.1	13
1	4381	2022-09-25 09:37:29	1	0	26.2227	78	3	female	2	1.55	63	No	Widowed	1	#NULL!	0	Reproductive System	0	1	1	1	1	0	0	0	67.3	1	44.9	#NULL!	7.11	4.86	68.4	152	2	1	5.46	2	45.4	1.79	192	2	0.2	10.6	#NULL!	#NULL!	#NULL!	#NULL!	17.7	18
1	4275	2022-09-25 09:41:14	1	1	19.025	74	2	female	2	1.45	40	No	Widowed	0	#NULL!	0	Reproductive System	4	0	0	0	0	0	0	1	67.2	1	27.6	150	5.73	4.31	75.2	96	1	2	2.95	1	30.6	1.05	193	2	0.16	8	4.17	1.59	1.05	1	6.5	11
1	4175	2022-09-26 15:04:17	1	1	20.4082	68	1	female	2	1.4	40	No	Married	1	#NULL!	0	Respiratory system	4	0	1	0	0	1	0	0	65.7	1	41.2	#NULL!	7.05	4.82	68.4	125	2	2	4.32	2	38.6	1.37	303	3	0.26	8.5	4.19	1.37	0.99	1	4.1	22
1	4324	2022-09-27 12:15:16	1	0	24.2215	84	4	male	1	1.7	70	No	Other	3	#NULL!	0	Digestive System	0	0	1	0	0	0	0	0	70.5	2	39.3	#NULL!	5.58	4.28	76.6	140	2	2	5.24	2	43.6	0.94	132	2	0.15	11.6	#NULL!	#NULL!	#NULL!	#NULL!	10.8	71
1	4247	2022-09-28 11:04:36	1	0	24.7325	66	1	female	2	1.45	52	No	Married	1	#NULL!	0	Respiratory system	0	0	0	0	0	0	0	0	64.8	1	34	#NULL!	7.8	4.51	57.8	136	2	1	4.47	2	42.7	2.27	223	2	0.21	9.5	5.36	2.28	1.26	#NULL!	4.6	16
1	4395	2022-09-28 13:22:04	1	1	20.679	84	4	male	1	1.8	67	No	Married	1	#NULL!	0	Reproductive System	0	0	0	0	0	0	0	0	67.4	1	38.7	#NULL!	6.03	3.74	62.1	113	1	1	5.44	2	37.4	1.53	192	2	0.19	9.9	4.68	1.24	0.95	1	6.9	19
1	4388	2022-09-28 14:25:04	1	0	22.0604	75	2	female	2	1.55	53	No	Married	1	#NULL!	0	Respiratory system	0	0	1	0	0	0	0	0	69.2	2	44.8	#NULL!	7.91	5.39	68	147	2	1	4.8	2	44.8	2.06	196	2	0.21	10.6	5.74	1.64	1.11	#NULL!	19.2	22
1	4330	2022-09-29 12:08:05	2	0	23.2335	66	1	male	1	1.58	58	No	Married	1	#NULL!	0	Respiratory System	4	0	0	0	0	1	0	0	62.2	1	36	#NULL!	6.52	4.84	74.1	135	2	2	4.43	2	42.5	1.04	228	2	0.22	9.5	#NULL!	#NULL!	#NULL!	#NULL!	5.1	24
1	4236	2022-09-29 12:46:40	1	0	21.4844	86	5	male	1	1.6	55	No	Divorced	4	#NULL!	1	Respiratory System	4	0	0	0	0	0	0	1	57.7	1	28.5	#NULL!	6.65	4.75	71.4	143	2	2	5.25	2	44.5	0.77	273	2	0.23	8.4	#NULL!	#NULL!	#NULL!	#NULL!	12.9	16
1	4413	2022-09-30 09:02:46	1	1	15.2416	82	4	male	1	1.62	40	No	Widowed	0	#NULL!	1	Digestive System	0	0	0	0	0	0	0	0	50.1	1	26.9	109	2.43	1.4	57.5	80	1	1	3.22	1	25.8	0.71	192	2	0.15	7.8	#NULL!	#NULL!	#NULL!	#NULL!	6.8	14
1	4261	2022-09-30 09:35:01	2	1	20.3428	66	1	female	2	1.52	47	No	Other	3	#NULL!	0	Digestive System	0	1	0	0	0	0	0	0	83.8	2	44.4	#NULL!	4.96	1.9	38.2	139	2	1	4.23	2	42.3	2.32	267	2	0.2	7.3	#NULL!	#NULL!	#NULL!	#NULL!	6.5	14
1	4364	2022-09-30 12:12:27	1	1	17.4818	82	4	female	2	1.55	42	No	Married	1	#NULL!	0	Urinary System	0	0	0	0	1	1	0	0	65.2	1	34	#NULL!	4.23	2.74	64.5	87	1	1	4.02	2	28.6	1.12	300	2	0.22	7.2	#NULL!	#NULL!	#NULL!	#NULL!	7.7	11
1	4405	2022-10-01 08:41:36	2	0	22.7204	73	2	male	1	1.73	68	No	Married	1	#NULL!	0	Respiratory System	0	0	0	0	0	0	0	0	61.3	1	37	#NULL!	5.62	3.92	69.7	135	2	2	4.58	2	41.6	1.14	167	2	0.18	10.6	#NULL!	#NULL!	#NULL!	#NULL!	9.8	14
1	4112	2022-10-01 09:53:16	2	1	15.5556	76	3	female	2	1.5	35	No	Widowed	0	#NULL!	0	Digestive System	4	1	0	0	0	1	0	0	52	1	29.4	45	7.03	5.52	78.6	87	1	2	4.09	2	28.3	0.98	209	2	0.19	9	#NULL!	#NULL!	#NULL!	#NULL!	12.6	12
1	3398	2022-10-02 10:14:57	2	0	20.6612	86	5	female	2	1.54	49	No	Married	1	#NULL!	0	Reproductive System	0	0	0	0	0	0	0	1	57.1	1	27.9	#NULL!	16.73	14.4	86	109	1	2	3.34	1	32	0.98	316	3	0.27	8.5	#NULL!	#NULL!	#NULL!	#NULL!	11.5	35
1	4210	2022-10-02 10:26:00	1	0	22.6757	76	3	male	1	1.68	64	No	Married	1	#NULL!	0	Reproductive System	4	1	0	1	0	0	0	0	61.9	1	36	#NULL!	23	5.89	77.1	131	2	2	3	1	39.4	1.05	162	2	0.15	9.4	#NULL!	#NULL!	#NULL!	#NULL!	26.7	7
1	4229	2022-10-02 10:42:24	1	1	17.5781	67	1	male	1	1.6	45	No	Married	1	#NULL!	0	Respiratory System	4	0	0	0	1	0	0	0	61.8	1	35.2	130	4.71	2.55	54.1	121	2	1	3.67	1	36	1.6	210	2	0.16	7.4	3.82	0.88	1.02	1	3.1	10
1	4327	2022-10-02 13:51:23	2	0	21.6413	65	1	female	2	1.52	50	No	Married	1	#NULL!	0	Digestive System	0	1	1	1	1	0	0	0	70.1	2	37.9	#NULL!	2.88	1.18	40.8	89	1	1	3.7	1	27.5	1	301	3	0.27	9.1	#NULL!	#NULL!	#NULL!	#NULL!	6.5	11
1	4288	2022-10-02 15:56:38	2	1	19.3772	66	1	male	1	1.7	56	No	Married	1	#NULL!	0	Respiratory System	4	0	0	0	0	0	0	0	64.3	1	41.2	#NULL!	3.78	2.49	65.8	129	2	1	4.07	2	40	0.88	139	2	0.13	9.5	5.53	0.75	1.66	#NULL!	5.7	21
1	4335	2022-10-04 09:15:51	1	0	21.4844	71	2	male	1	1.6	55	No	Married	1	#NULL!	0	Urinary System	0	1	0	0	0	0	0	0	66.3	1	31.7	#NULL!	8.69	7.43	85.5	101	1	2	3.9	1	32.2	0.67	241	2	0.21	8.7	#NULL!	#NULL!	#NULL!	#NULL!	13.7	21
1	4035	2022-10-05 08:28:09	1	0	26.8923	74	2	male	1	1.67	75	No	Other	3	#NULL!	0	Digestive System	0	0	1	0	1	1	0	1	72.6	2	42	148	7.97	4.09	51.3	161	2	1	4.86	2	49.6	3.31	151	2	0.14	9.4	#NULL!	#NULL!	#NULL!	#NULL!	20.3	38
1	4369	2022-10-05 08:39:43	1	0	20.7031	68	1	female	2	1.6	53	No	Married	1	#NULL!	0	Respiratory System	0	0	0	0	0	0	0	0	67.5	1	41.1	228	6.03	5.14	85	148	2	2	4.73	2	45.2	0.81	220	2	0.22	10.1	5.27	0.88	1.39	#NULL!	13.5	65
1	4375	2022-10-05 08:41:55	1	1	17.7154	70	1	male	1	1.68	50	No	Married	1	#NULL!	0	Digestive System	0	0	1	1	0	0	0	0	52.6	1	32.8	#NULL!	8.42	5.66	67.2	102	1	1	3.21	1	30	1.89	300	2	0.28	9.4	2.49	1.75	0.5	1	1.3	32
1	4267	2022-10-05 08:55:21	2	0	21.2183	73	2	male	1	1.61	55	No	Married	1	#NULL!	0	Other	0	0	1	0	0	1	0	0	48.1	1	28.9	#NULL!	10.89	8.8	80.8	101	1	2	2.77	1	31.2	1.18	155	2	0.15	9.6	3.32	1.14	1.06	1	23.2	14
1	4214	2022-10-05 09:07:34	1	0	25.8166	70	1	male	1	1.67	72	No	Married	1	#NULL!	0	Digestive System	0	0	0	0	0	0	0	0	52	1	31.9	#NULL!	9.23	7.43	80.5	118	1	2	3.98	1	35.9	1.3	220	2	0.21	9.4	4.07	0.88	0.92	1	9.5	10
1	4382	2022-10-05 09:07:34	2	1	18.2222	66	1	female	2	1.5	41	No	Unmarried	#NULL!	#NULL!	0	Digestive System	0	1	0	0	0	0	0	0	58.5	1	36.9	#NULL!	3.99	2.8	70	78	1	2	2.36	1	24.6	0.8	108	2	0.09	8.7	4.7	1.03	2.04	0	12.1	20
1	4306	2022-10-05 09:40:02	1	1	20.4444	84	4	male	1	1.5	46	No	Married	1	#NULL!	0	Digestive System	0	0	0	0	0	0	0	0	66.5	1	36.6	#NULL!	3.94	2.99	75.7	119	1	2	3.56	1	34.2	0.56	274	2	0.24	8.6	3.64	0.69	0.9	1	20.2	15
1	4295	2022-10-06 08:45:43	1	0	26.8544	78	3	male	1	1.66	74	No	Married	1	#NULL!	0	Digestive System	4	0	0	1	0	0	0	0	60.7	1	34.6	#NULL!	5.92	3.92	66.2	95	1	1	3.61	1	28.8	1.26	160	2	0.17	10.8	#NULL!	#NULL!	#NULL!	#NULL!	7.9	21
1	4390	2022-10-06 08:50:03	1	1	15.4006	82	4	female	2	1.55	37	No	Married	1	#NULL!	0	Other	0	0	0	0	0	1	0	0	57.4	1	26.7	#NULL!	18.21	15.5	85.2	97	1	2	3.28	1	29	1.17	393	3	0.3	7.7	3.49	0.52	1.05	1	11.4	16
1	4132	2022-10-06 09:11:05	2	0	30.478	70	1	male	1	1.67	85	No	Divorced	4	#NULL!	0	Reproductive System	4	0	0	0	0	0	0	1	68.7	2	39.9	235	3.95	2.01	50.9	157	2	1	5.12	2	46.2	1.54	190	2	0.17	9	3.49	2.31	0.59	1	14.2	51
1	4376	2022-10-06 12:05:46	1	1	15.1111	75	2	female	2	1.5	34	No	Married	1	#NULL!	0	Respiratory System	4	0	0	0	0	0	0	0	70.4	2	37.5	186	116.6	4.52	69	123	2	2	9.6	2	39	1.18	224	2	0.23	10.3	5.22	0.73	1.62	#NULL!	6	8
1	4417	2022-10-07 08:52:20	2	0	21.4286	66	1	female	2	1.4	42	No	Married	1	#NULL!	0	Respiratory System	0	1	0	1	0	1	0	0	66.6	1	39.7	#NULL!	46.8	3.53	56.5	112	1	1	4.2	2	34.6	1.82	152	2	0.15	9.9	6.21	0.66	2.03	#NULL!	4.8	12
1	4341	2022-10-08 08:35:37	2	1	20	79	3	female	2	1.5	45	No	Married	1	#NULL!	0	Digestive System	4	0	1	1	0	0	0	0	66.2	1	31	#NULL!	3.75	2.38	63.8	106	1	1	3.84	1	35.1	0.95	169	2	0.12	7	#NULL!	#NULL!	#NULL!	#NULL!	6.5	12
1	4251	2022-10-08 08:45:16	1	0	23.3067	68	1	male	1	1.67	65	No	Other	3	#NULL!	0	Respiratory System	0	0	0	0	0	0	0	0	65.9	1	38.9	#NULL!	7.9	3.3	41.8	158	2	1	4.73	2	47.9	3.84	159	2	0.16	10.1	5.78	1.29	1.57	#NULL!	17.6	13
1	4315	2022-10-08 09:23:52	1	1	16.4062	77	3	female	2	1.6	42	No	Other	3	#NULL!	0	Reproductive System	0	0	0	0	0	0	0	0	68.9	2	34.5	#NULL!	6.44	5.67	88	106	1	2	3.53	1	33	0.5	120	2	0.12	10.1	#NULL!	#NULL!	#NULL!	#NULL!	12.5	70
1	4347	2022-10-08 09:45:27	2	0	23.6128	76	3	male	1	1.54	56	No	Married	1	#NULL!	0	Digestive System	4	0	0	1	0	1	0	1	54.6	1	29.8	#NULL!	7.13	5.38	75.3	135	2	2	4.12	2	41.1	1.25	72	1	0.09	12.5	#NULL!	#NULL!	#NULL!	#NULL!	43.1	41
1	4183	2022-10-08 10:00:44	1	0	24.8016	67	1	male	1	1.68	70	No	Married	1	#NULL!	0	Digestive System	0	1	0	0	0	1	0	0	74.1	2	42.9	#NULL!	1.1	2.6	41.3	163	2	1	1.1	1	51.6	3.05	225	2	0.24	10.5	5.92	1.47	1.23	#NULL!	13.5	17
1	4396	2022-10-08 14:36:59	1	1	19.8839	70	1	male	1	1.78	63	No	Married	1	#NULL!	0	Reproductive	0	0	1	1	0	0	0	0	64.3	1	36.4	#NULL!	8.4	7.57	90.2	135	2	2	4.45	2	42.8	0.7	209	2	0.19	9.2	5.46	0.68	1.29	#NULL!	5.7	12
1	4346	2022-10-09 08:48:56	1	0	22.5981	87	5	male	1	1.76	70	No	Married	1	#NULL!	0	Other	0	0	0	1	0	0	0	0	54.8	1	29.8	#NULL!	4.14	2.53	61.1	132	2	2	4.56	2	38.7	0.7	140	2	0.14	9.7	2.61	1.15	0.88	1	23.3	8
1	4370	2022-10-09 09:22:29	2	1	22.719	96	5	female	2	1.57	56	No	Married	1	#NULL!	0	Respiratory System	0	0	0	1	0	0	0	0	66.3	1	28.5	#NULL!	6.92	4.84	70	114	1	2	3.82	1	35	1.47	292	2	0.27	9.4	2.5	1.49	0.77	1	9.2	26
1	4317	2022-10-09 09:35:47	1	0	26.4236	70	1	male	1	1.74	80	No	Married	1	#NULL!	0	Digestive System	0	0	1	0	0	0	0	0	77.6	2	47.6	#NULL!	3.89	2.04	52.4	116	1	1	3.61	1	34.8	1.5	223	2	0.17	7.6	#NULL!	#NULL!	#NULL!	#NULL!	8.2	19
1	4520	2022-10-09 09:36:04	1	0	24.0346	70	1	male	1	1.58	60	No	Married	1	#NULL!	0	Digestive System	0	0	0	0	0	0	0	0	62.7	1	39.8	#NULL!	5	2.14	42.8	156	2	1	4.7	2	46	1.04	139	2	0.14	9.7	#NULL!	#NULL!	#NULL!	#NULL!	16.8	16
1	4348	2022-10-09 11:00:39	1	0	22.7244	71	2	male	1	1.78	72	No	Married	1	#NULL!	0	Urinary System	0	0	0	0	0	0	0	0	62.8	1	39.3	#NULL!	6.31	4.78	75.8	128	2	2	3.93	1	37.9	0.99	166	2	0.18	10.7	#NULL!	#NULL!	#NULL!	#NULL!	14.1	19
1	4269	2022-10-09 11:46:22	2	1	#NULL!	83	4	female	2	1.58	#NULL!	Yes	Widowed	0	#NULL!	0	Digestive System	4	0	1	1	0	0	0	0	77.4	2	33.2	154	8.12	6.15	75.8	108	1	2	3.71	1	35.9	1.3	408	3	0.37	9	#NULL!	#NULL!	#NULL!	#NULL!	22.1	21
1	4313	2022-10-10 08:36:08	1	1	17.0068	84	4	male	1	1.68	48	No	Married	1	#NULL!	0	Digestive System	0	0	0	0	0	0	0	0	73.7	2	38.5	#NULL!	5.82	3.03	52.2	120	1	1	3.55	1	37.7	2.14	151	2	0.13	8.5	#NULL!	#NULL!	#NULL!	#NULL!	11.1	10
1	4277	2022-10-10 08:36:23	1	1	18.424	71	2	male	1	1.68	52	No	Married	1	#NULL!	0	Respiratory System	0	0	0	1	0	0	0	0	67.1	1	41.1	#NULL!	5.57	4.14	74.4	159	2	2	4.92	2	48.3	1.1	109	2	0.14	12.6	6.13	1.14	1.96	#NULL!	14.3	21
1	4252	2022-10-10 09:16:37	2	0	22.6667	77	3	female	2	1.5	51	No	Married	1	#NULL!	0	Respiratory System	0	0	1	0	0	0	0	0	74	2	40	#NULL!	4.81	2.31	48.1	132	2	1	4.15	2	40.5	2.04	184	2	0.19	10.1	#NULL!	#NULL!	#NULL!	#NULL!	7.8	22
1	4304	2022-10-10 10:11:58	2	1	14.7015	67	1	male	1	1.73	44	No	Widowed	1	#NULL!	0	Digestive System	0	1	0	0	0	0	0	0	64.2	1	37.6	176	8.3	7.27	87.5	120	1	2	4.05	2	35.4	0.71	248	2	0.18	7.4	3.68	0.57	1.35	0	17.6	163
1	4400	2022-10-10 12:40:25	2	1	19.9219	75	2	female	2	1.6	51	No	Widowed	0	#NULL!	0	Digestive System	4	0	0	0	0	0	0	0	58.6	1	35.2	#NULL!	5.46	4.65	85.2	107	1	2	3.48	1	32	0.39	110	2	0.1	8.8	#NULL!	#NULL!	#NULL!	#NULL!	12.6	12
1	4263	2022-10-11 09:34:06	1	0	21.3333	73	2	female	2	1.5	48	No	Married	1	#NULL!	0	Respiratory System	0	1	0	0	0	0	0	1	65.1	1	35.9	#NULL!	6.63	3.99	60	133	2	1	4.76	2	42.6	2	221	2	0.24	10.6	2.9	1.38	0.84	1	11.1	11
1	4387	2022-10-11 10:49:22	1	1	15.4006	68	1	female	2	1.55	37	No	Married	1	#NULL!	0	Respiratory System	4	0	1	0	0	0	0	1	59	1	12	#NULL!	19.02	15.29	80.3	112	1	2	3.87	1	33	0.68	297	2	0.23	7.7	3.15	0.82	0.69	1	4.1	173
1	4191	2022-10-11 11:10:21	2	1	18.7305	78	3	female	2	1.55	45	No	Married	1	#NULL!	0	Digestive System	4	1	1	0	0	1	0	0	62.5	1	28.3	#NULL!	6.86	5.42	79	124	2	2	3.73	1	32.6	0.99	269	2	0.29	10.8	#NULL!	#NULL!	#NULL!	#NULL!	4.4	7
1	4430	2022-10-12 08:47:55	1	0	26.3465	66	1	male	1	1.63	70	No	Married	1	#NULL!	0	Respiratory System	4	0	0	0	0	0	0	0	69.3	2	44.6	#NULL!	4.63	3.17	68.4	148	2	1	4.5	2	44.3	1.04	194	2	0.18	9.3	4.44	2.2	0.92	1	15.9	21
1	4314	2022-10-12 09:11:40	1	0	33.3195	66	1	female	2	1.47	72	No	Married	1	#NULL!	0	Reproductive System	4	0	0	0	0	0	0	0	80.5	2	47.8	#NULL!	31.9	2.78	59.3	130	2	1	37.7	2	41	1.53	222	2	0.21	9.6	#NULL!	#NULL!	#NULL!	#NULL!	12.1	32
1	4455	2022-10-12 09:20:29	1	0	25.9701	66	1	female	2	1.63	69	No	Married	1	#NULL!	0	Other	0	0	1	0	0	0	0	0	81.5	2	47.5	#NULL!	9.13	4.49	49.2	168	2	1	5.11	2	50	3.32	235	2	0.25	10.6	4.63	1.43	1.09	1	14.7	52
1	4266	2022-10-12 10:47:02	1	1	15.917	82	4	male	1	1.7	46	No	Married	1	#NULL!	0	Reproductive System	0	0	1	0	0	1	0	0	53.7	1	29.7	#NULL!	3156.3	3.49	68.3	94	1	1	421.6	2	29.1	1.27	218	2	0.17	7.6	#NULL!	#NULL!	#NULL!	#NULL!	6.4	9
1	4368	2022-10-12 11:12:25	2	0	20.8117	76	3	female	2	1.55	50	No	Married	1	#NULL!	0	Respiratory	4	0	0	0	0	0	0	0	75.4	2	38.5	#NULL!	4.35	3.03	69.7	111	1	2	3.49	1	35.1	0.89	152	2	0.15	9.9	4.45	1.18	1.51	0	5.3	59
1	4401	2022-10-13 10:00:51	1	0	26.2227	77	3	male	1	1.55	63	No	Married	1	#NULL!	0	Other	0	0	1	1	1	0	0	0	65.2	1	38	#NULL!	3.89	2.21	56.8	127	2	1	3.72	1	37	1.39	68	1	#NULL!	#NULL!	7.08	1.96	1.3	#NULL!	26.1	25
1	4432	2022-10-13 10:06:46	1	1	19.8791	71	2	female	2	1.57	49	No	Married	1	#NULL!	0	Respiratory System	4	0	0	0	0	0	0	0	69.5	2	43.6	#NULL!	3.9	2.69	69.2	124	2	1	3.99	1	39.9	0.87	127	2	0.17	13	6.37	1.87	1.42	#NULL!	7.5	17
1	4442	2022-10-13 11:46:16	2	1	19.9792	74	2	male	1	1.55	48	No	Married	1	#NULL!	0	Respiratory System	4	0	0	0	0	0	0	0	76.7	2	40.9	#NULL!	5.39	3.51	65.2	133	2	1	4.34	2	40.2	1.4	165	2	0.19	11.3	4.72	0.93	1.79	0	13.3	17
1	4454	2022-10-14 08:42:27	1	1	17.898	66	1	male	1	1.55	43	No	Married	1	#NULL!	0	Digestive System	4	1	0	0	0	0	0	0	62.4	1	37.6	#NULL!	5.63	3.72	66.1	116	1	1	4.34	2	37	1.44	313	3	0.25	8	#NULL!	#NULL!	#NULL!	#NULL!	6.9	62
1	4445	2022-10-14 09:19:40	1	0	22.2656	70	1	female	2	1.6	57	No	Married	1	#NULL!	0	Respiratory System	4	0	0	0	0	0	0	0	68.1	2	40	#NULL!	3.63	1.98	54.6	131	2	1	4.2	2	40	1.33	253	2	0.23	8.9	5.36	1.84	1.19	#NULL!	7.2	15
1	4410	2022-10-14 09:50:14	2	0	23.0518	80	3	male	1	1.64	62	No	Married	1	#NULL!	0	Respiratory System	4	0	1	1	1	0	0	0	72	2	35.9	#NULL!	11.36	8.9	78.4	124	2	2	4.39	2	38	1.31	301	3	0.3	9.9	3.02	0.72	1.08	1	8.3	17
1	4483	2022-10-14 10:01:57	1	0	26.8386	70	1	female	2	1.58	67	No	Married	1	#NULL!	0	Reproductive System	0	1	0	0	0	0	0	0	84.8	2	44.3	#NULL!	5.39	3.69	68.5	130	2	1	4.11	2	40.1	1.14	144	2	0.17	11.9	#NULL!	#NULL!	#NULL!	#NULL!	10.5	26
1	4447	2022-10-14 10:01:57	1	1	#NULL!	74	2	male	1	#NULL!	#NULL!	Yes	Married	1	#NULL!	0	Digestive System	0	1	0	0	0	0	0	0	72.8	2	42.2	#NULL!	6.02	3.69	61.2	136	2	1	3.94	1	41.5	1.57	91	1	0.08	9	3.96	1.4	0.89	1	18.3	34
1	4293	2022-10-14 11:12:14	1	0	20.898	77	3	male	1	1.75	64	No	Married	1	#NULL!	0	Reproductive system	4	1	0	0	0	1	0	0	66.7	1	35.5	#NULL!	4.18	2.6	62.2	87	1	1	4.97	2	32.9	1.05	280	2	0.22	7.8	#NULL!	#NULL!	#NULL!	#NULL!	4.8	16
1	4309	2022-10-15 08:43:08	1	1	20.7756	73	2	male	1	1.52	48	No	Married	1	#NULL!	0	Digestive System	4	0	1	0	0	0	0	1	60.2	1	32.4	#NULL!	7.85	6.36	81	136	2	2	4.34	2	41	0.95	136	2	0.16	12	#NULL!	#NULL!	#NULL!	#NULL!	19.3	22
1	4505	2022-10-15 08:44:51	1	0	22.2222	81	4	female	2	1.5	50	No	Married	1	#NULL!	0	Digestive System	4	0	1	0	0	0	0	0	73.6	2	41.1	#NULL!	7.59	6.07	80.1	108	1	2	3.51	1	33.2	0.95	232	2	0.18	7.7	#NULL!	#NULL!	#NULL!	#NULL!	21.1	12
1	4397	2022-10-15 09:01:10	2	0	26.6667	65	1	female	2	1.5	60	No	Married	1	#NULL!	0	Digestive System	0	1	0	0	0	0	0	0	71	2	42	#NULL!	2.68	1.4	52.2	114	1	1	3.73	1	35.5	0.91	119	2	0.09	7.6	#NULL!	#NULL!	#NULL!	#NULL!	9.1	16
1	4485	2022-10-15 15:32:20	1	0	23.2335	68	1	female	2	1.58	58	No	Married	1	#NULL!	0	Respiratory System	0	1	1	0	1	0	0	0	65.2	1	39.5	#NULL!	5.87	4.04	68.8	168	2	1	6.14	2	55.3	1.26	208	2	0.22	10.5	5.67	1.15	1.24	#NULL!	7.1	25
1	4500	2022-10-16 15:58:53	1	1	19.3625	71	2	male	1	1.67	54	No	Married	1	#NULL!	0	Respiratory System	4	0	1	1	0	0	0	0	71.4	2	43.6	#NULL!	5.02	3.9	77.8	118	1	2	3.8	1	37.2	0.63	139	2	0.12	8.7	4.1	1.02	1.43	0	10.7	10
1	4270	2022-10-17 09:43:46	1	0	21.7738	70	1	male	1	1.66	60	No	Married	1	#NULL!	0	Blood System	0	0	1	0	0	1	0	1	119.2	2	18	#NULL!	4.27	3.09	72.5	44	1	2	1.73	1	14.5	0.9	17	1	0.02	10.3	1.47	0.69	0.37	1	6.9	84
1	4474	2022-10-18 08:41:27	2	0	21.1073	66	1	male	1	1.7	61	No	Married	1	#NULL!	0	Digestive System	0	0	0	0	0	0	0	0	85.6	2	42.1	#NULL!	3.74	2.17	58.2	150	2	1	4.5	2	47.8	1.08	70	1	0.08	11.8	#NULL!	#NULL!	#NULL!	#NULL!	13	28
1	4440	2022-10-18 09:04:26	1	0	22.3703	70	1	female	2	1.48	49	No	Married	1	#NULL!	0	Reproductive System	0	1	0	0	0	0	0	0	79.5	2	45.3	#NULL!	5.79	4.07	70.2	138	2	2	4.33	2	42.2	1.2	231	2	0.17	7.5	3.87	0.8	1.54	0	12.3	24
1	4425	2022-10-18 09:43:07	1	1	17.8506	68	1	female	2	1.57	44	No	Married	1	#NULL!	0	Urinary System	0	0	0	0	0	0	0	0	63.4	1	38.5	#NULL!	4.49	2.69	60	125	2	1	4.51	2	38.9	1.47	256	2	0.23	8.9	#NULL!	#NULL!	#NULL!	#NULL!	7.2	13
1	4422	2022-10-19 08:49:55	2	0	21.5139	66	1	male	1	1.67	60	No	Married	1	#NULL!	0	Respiratory System	4	0	0	0	0	0	0	0	69	2	43.3	#NULL!	5.69	3.52	61.9	143	2	1	4.44	2	43.7	1.39	122	2	0.11	9.1	7.16	1.24	1.5	#NULL!	7.6	35
1	4312	2022-10-19 08:54:22	1	1	18.0172	66	1	female	2	1.49	40	No	Unmarried	#NULL!	#NULL!	0	Digestive System	0	0	0	0	0	0	0	0	58.2	1	36.1	#NULL!	5.89	3.86	65.8	79	1	1	2.53	1	25.6	1.39	107	2	0.09	8.8	4.37	1.62	1.98	0	9.4	17
1	4507	2022-10-19 11:00:43	2	0	23.5078	80	3	male	1	1.65	64	No	Married	1	#NULL!	0	Respiratory System	4	0	0	0	1	0	0	0	63	1	33.7	#NULL!	13.2	11.68	88.5	135	2	2	4.24	2	40	0.94	352	3	0.3	8.4	#NULL!	#NULL!	#NULL!	#NULL!	7.9	50
1	4473	2022-10-19 15:30:35	1	1	#NULL!	72	2	male	1	1.7	#NULL!	Yes	Married	1	#NULL!	0	Digestive System	4	0	0	0	0	1	0	0	51.7	1	31	#NULL!	10.23	8.41	82.3	110	1	2	3.81	1	35.6	1.23	167	2	0.19	11.3	#NULL!	#NULL!	#NULL!	#NULL!	10.7	28
1	4465	2022-10-20 09:27:24	1	0	20.8889	66	1	female	2	1.5	47	No	Married	1	#NULL!	0	Digestive System	0	1	0	0	0	0	0	0	76.5	2	42.8	#NULL!	3.22	1.62	50.2	131	2	1	4.07	2	40.5	1.08	233	2	0.17	7.4	#NULL!	#NULL!	#NULL!	#NULL!	7	21
1	4461	2022-10-20 21:30:51	1	1	13.1492	67	1	female	2	1.56	32	No	Married	1	#NULL!	1	Respiratory System	4	0	0	0	0	0	0	0	69.1	2	30	#NULL!	9.96	8.1	81.4	128	2	2	4.72	2	40	0.85	212	2	0.18	8.4	2.51	0.75	0.64	1	6.5	22
1	4513	2022-10-21 09:18:20	2	0	24.6755	68	1	male	1	1.72	73	No	Married	1	#NULL!	0	Respiratory System	0	0	0	0	1	0	0	0	67.8	1	46.3	#NULL!	6.06	3.25	53.6	154	2	1	4.87	2	45	2.34	189	2	0.16	8.7	#NULL!	#NULL!	#NULL!	#NULL!	11.6	17
1	4460	2022-10-21 09:44:58	1	0	25.7117	70	1	male	1	1.65	70	No	Married	1	#NULL!	0	Respiratory System	0	0	0	0	0	0	0	0	76.9	2	45.4	#NULL!	9.51	7.83	82.4	135	2	2	4.57	2	42.4	1.34	236	2	0.22	9.1	#NULL!	#NULL!	#NULL!	#NULL!	8.8	24
1	4321	2022-10-21 11:16:25	1	1	19.7239	69	1	female	2	1.56	48	No	Married	1	#NULL!	0	Respiratory System	0	0	0	0	0	0	0	0	69.8	2	43.1	#NULL!	4.15	2.49	60	134	2	1	4.42	2	42.1	1.35	180	2	0.22	12.2	5.48	1.03	1.65	#NULL!	12.6	20
1	4268	2022-10-22 09:17:16	1	1	19.9219	70	1	male	1	1.6	51	No	Married	1	#NULL!	0	Digestive System	0	1	0	0	0	1	0	1	61.4	1	34.1	#NULL!	10.01	8.23	82.2	113	1	2	3.9	1	33.4	1.14	413	3	0.36	8.7	#NULL!	#NULL!	#NULL!	#NULL!	17.1	23
1	4594	2022-10-22 10:43:32	1	0	21.6413	65	1	female	2	1.52	50	No	Other	3	#NULL!	0	Digestive System	4	0	1	1	1	0	0	0	70.1	2	40.5	#NULL!	2.85	1.5	52.8	94	1	1	4.02	2	30	0.81	221	2	0.22	9.9	#NULL!	#NULL!	#NULL!	#NULL!	8.7	14
1	4497	2022-10-23 09:56:31	2	1	17.5781	81	4	male	1	1.6	45	No	Married	1	#NULL!	0	Reproductive System	4	0	1	1	0	0	0	0	53.7	1	38.4	#NULL!	3.5	2.42	69	87	1	2	3.01	1	28.4	0.73	110	2	0.11	9.7	#NULL!	#NULL!	#NULL!	#NULL!	11.8	15
1	4438	2022-10-23 10:14:15	2	0	24.8016	66	1	male	1	1.68	70	No	Married	1	#NULL!	0	Digestive System	0	0	0	0	0	1	0	0	68.7	2	40.1	#NULL!	10.56	8.34	79	151	2	2	4.42	2	42.6	1.22	178	2	0.17	9.8	#NULL!	#NULL!	#NULL!	#NULL!	21.1	14
1	4446	2022-10-24 09:28:11	1	0	25.8166	70	1	male	1	1.67	72	No	Married	1	#NULL!	0	Digestive System	0	1	0	0	0	0	0	0	67.6	1	38.6	#NULL!	7.45	4.99	67.1	133	2	1	4.71	2	41.5	1.75	265	2	0.22	8.3	#NULL!	#NULL!	#NULL!	#NULL!	7.7	30
1	4532	2022-10-25 08:21:00	1	0	25.3902	69	1	female	2	1.55	61	No	Married	1	#NULL!	0	Respiratory System	4	1	0	0	0	0	0	0	69.3	2	42.7	#NULL!	3.32	1.92	57.8	109	1	1	2.95	1	34	1.07	228	2	0.2	8.6	#NULL!	#NULL!	#NULL!	#NULL!	6.1	35
1	4552	2022-10-25 08:40:49	1	1	16.6468	77	3	female	2	1.45	35	No	Married	1	#NULL!	0	Urinary System	4	0	1	0	0	1	0	0	66.1	1	41.4	#NULL!	4.83	4.24	87.8	111	1	2	3.43	1	33	0.26	240	2	0.21	8.9	#NULL!	#NULL!	#NULL!	#NULL!	8.1	40
1	4486	2022-10-25 09:28:34	2	0	21.3039	76	3	male	1	1.65	58	No	Married	1	#NULL!	0	Digestive System	4	0	0	0	0	0	0	0	67.5	1	38.2	#NULL!	7.07	3.97	56.2	118	1	1	3.86	1	36	1.91	190	2	0.23	12	#NULL!	#NULL!	#NULL!	#NULL!	6.7	15
1	4533	2022-10-25 09:40:27	1	1	18.0172	66	1	female	2	1.49	40	No	Unmarried	#NULL!	#NULL!	0	Digestive System	0	1	0	0	0	0	0	0	58.3	1	35.5	#NULL!	4.3	1.61	37.4	90	1	1	2.93	1	29.2	2.23	101	2	0.09	9.1	#NULL!	#NULL!	#NULL!	#NULL!	8.4	16
1	4571	2022-10-25 10:12:12	2	1	19.7777	68	1	female	2	1.59	50	No	Married	1	#NULL!	0	Respiratory System	0	0	1	0	1	0	0	0	63.3	1	40.9	#NULL!	5	2.86	56.9	129	2	1	4.12	2	39	1.78	284	2	0.24	8.4	4.23	1.21	1.87	0	5.9	22
1	4320	2022-10-25 12:15:07	1	1	16.7969	66	1	male	1	1.6	43	No	Married	1	#NULL!	0	Digestive System	0	1	0	0	0	1	0	0	75.2	2	29.7	#NULL!	6.99	5.88	84	87	1	2	3.16	1	26.9	0.73	271	2	0.26	9.6	#NULL!	#NULL!	#NULL!	#NULL!	11.5	18
1	4584	2022-10-25 12:32:37	2	1	20.2449	90	5	male	1	1.75	62	No	Widowed	0	#NULL!	0	Digestive System	0	1	1	1	1	0	0	0	72.5	2	40	#NULL!	6.7	4.05	60.4	149	2	1	5.12	2	42.6	1.82	217	2	0.18	8.2	#NULL!	#NULL!	#NULL!	#NULL!	10.3	10
1	4559	2022-10-25 19:42:24	1	0	21.9671	65	1	male	1	1.68	62	No	Married	1	#NULL!	0	Respiratory System	4	0	1	1	0	0	0	0	57	1	25.3	#NULL!	7.32	5.59	76.4	79	1	2	3.1	1	25	0.93	181	2	0.17	9.3	3.47	1.15	0.53	1	6.2	26
1	4480	2022-10-26 08:21:30	2	1	18.7783	71	2	male	1	1.68	53	No	Married	1	#NULL!	0	Respiratory System	0	0	0	1	0	0	0	0	61.6	1	38.6	#NULL!	3.9	2.63	67.2	158	2	1	4.92	2	49	0.92	83	1	0.09	12.2	5.21	1.03	1.76	#NULL!	11.3	14
1	4531	2022-10-26 09:46:44	2	0	22.6667	69	1	female	2	1.5	51	No	Married	1	#NULL!	0	Respiratory System	4	0	1	0	1	0	0	0	78	2	39.9	#NULL!	5.07	2.63	51.9	137	2	1	4.46	2	41.6	2.05	277	2	0.26	9.3	5.85	1.16	1.22	#NULL!	6.1	52
1	4544	2022-10-26 09:47:32	2	1	19.1746	74	2	female	2	1.48	42	No	Married	1	#NULL!	0	Reproductive System	0	0	0	0	0	0	0	0	57.2	1	30.7	#NULL!	9.46	7.81	82.6	74	1	2	3.26	1	26	0.94	493	3	0.42	8.6	#NULL!	#NULL!	#NULL!	#NULL!	5.2	14
1	4537	2022-10-26 09:58:30	2	0	22.4766	76	3	male	1	1.55	54	No	Other	3	#NULL!	0	Digestive System	4	0	0	1	0	0	0	1	40.2	1	23.1	#NULL!	4.4	3.44	78.2	102	1	2	3.08	1	30.6	0.44	44	1	0.06	13.8	#NULL!	#NULL!	#NULL!	#NULL!	26.4	26
1	4583	2022-10-26 12:16:09	2	0	21.1927	79	3	male	1	1.64	57	No	Married	1	#NULL!	0	Respiratory System	4	1	1	1	0	0	0	0	73.5	2	44.7	#NULL!	5.83	3.85	66	138	2	1	4.79	2	43.9	1.2	143	2	0.16	11	6.46	1.02	1.48	#NULL!	5.4	46
1	4541	2022-10-26 12:29:06	1	1	19.898	93	5	female	2	1.4	39	No	Widowed	0	#NULL!	0	Skin & Appendages	4	0	0	0	0	1	0	0	66.9	1	38.2	#NULL!	9.51	8.89	93.3	124	2	2	4.16	2	36.2	0.54	323	3	0.35	10.7	#NULL!	#NULL!	#NULL!	#NULL!	13.1	15
1	4548	2022-10-27 09:37:24	1	0	26.7532	76	3	male	1	1.51	61	No	Married	1	#NULL!	0	Blood System	4	0	0	0	0	0	0	0	69.2	2	40.8	#NULL!	3.91	2.68	68.5	152	2	2	4.68	2	47	0.72	159	2	0.19	11.8	4.08	1.73	1.05	1	27.1	25
1	4576	2022-10-28 08:49:18	1	1	19.8791	82	4	male	1	1.57	49	No	Married	1	#NULL!	0	Respiratory System	0	0	0	1	0	1	0	1	76.7	2	28.1	#NULL!	9.19	7.62	82.8	124	2	2	4.64	2	39.9	0.92	640	3	0.73	11.4	4.17	1.36	1.29	0	10	15
1	4564	2022-10-28 08:49:52	2	1	19.1467	70	1	male	1	1.55	46	No	Married	1	#NULL!	0	Blood System	0	0	0	1	0	0	0	1	48	1	21	#NULL!	3.74	2.69	71.9	71	1	2	2.24	1	23	0.42	258	2	0.22	8.4	2.13	0.95	0.54	1	4.2	23
1	4450	2022-10-28 08:52:27	2	1	20	84	4	female	2	1.5	45	No	Widowed	0	#NULL!	0	Reproductive System	4	1	1	1	0	0	0	0	66.2	1	41.4	#NULL!	6.05	3.94	65.3	91	1	1	3.13	1	29.1	1.42	143	2	0.13	8.7	3.59	1.08	1.39	0	3.1	24
1	4529	2022-10-28 11:11:18	1	0	25.7117	73	2	male	1	1.65	70	No	Married	1	#NULL!	0	Respiratory System	0	0	1	1	0	0	0	0	50.5	1	30.3	#NULL!	0	4.23	64.3	125	2	1	17.4	2	38	1.8	181	2	0.21	11.7	5.57	2.53	0.99	#NULL!	8.3	35
1	4542	2022-10-29 09:01:59	1	1	19.25	75	2	female	2	1.405	38	No	Married	1	#NULL!	0	Reproductive System	4	0	1	0	0	0	0	1	74.5	2	38.5	#NULL!	4.11	3.2	78	143	2	2	5.07	2	45.3	0.64	221	2	0.21	9.6	4.45	1.12	1.12	1	13.7	14
1	4577	2022-10-29 09:35:19	2	1	20	79	3	female	2	1.5	45	No	Married	1	#NULL!	0	Digestive System	4	0	1	1	0	0	0	0	80.9	2	36.7	#NULL!	3.59	2.02	56.5	121	2	1	4.04	2	38.3	0.99	181	2	0.13	7.2	#NULL!	#NULL!	#NULL!	#NULL!	5.7	12
1	4502	2022-10-29 10:26:42	1	1	17.5781	67	1	male	1	1.6	45	No	Married	1	#NULL!	0	Respiratory System	0	1	0	0	1	0	0	0	53.4	1	27	#NULL!	7.09	4.63	65.4	90	1	1	3.18	1	29.1	1.54	443	3	0.28	6.3	2.93	0.78	0.7	1	5.9	12
1	4579	2022-10-29 11:16:08	2	1	20.3954	74	2	male	1	1.55	49	No	Married	1	#NULL!	0	Respiratory System	4	0	0	0	0	0	0	0	65.5	1	33.7	#NULL!	3.41	2.38	69.7	118	1	2	3.9	1	35.7	0.62	221	2	0.21	9.6	3.64	0.49	1.35	0	14	14
1	4534	2022-10-30 08:27:26	1	0	21.3039	66	1	female	2	1.65	58	No	Married	1	#NULL!	0	Digestive System	0	1	1	0	0	0	0	0	65.9	1	38.9	#NULL!	3.71	1.83	49.3	136	2	1	4.34	2	42.1	1.42	194	2	0.16	8.5	3.93	0.34	1.56	0	7.2	14
1	4611	2022-10-30 09:04:16	1	0	24.0346	70	1	male	1	1.58	60	No	Married	1	#NULL!	0	Digestive System	0	0	0	0	0	0	0	0	62.7	1	41.1	#NULL!	8.43	2.71	32.1	153	2	1	4.73	2	47.2	1.08	117	2	0.13	10.8	3.43	0.79	1.05	1	17.2	24
1	4591	2022-10-30 09:26:47	1	0	21.4844	71	2	male	1	1.6	55	No	Married	1	#NULL!	0	Reproductive System	4	1	0	0	0	0	0	0	70.8	2	35.7	#NULL!	5.09	2.94	57.7	108	1	1	4.14	2	34.1	1.72	196	2	0.18	8.9	#NULL!	#NULL!	#NULL!	#NULL!	9.1	21
1	4492	2022-10-30 11:31:16	2	0	27.5482	69	1	female	2	1.65	75	No	Other	3	#NULL!	0	Respiratory System	0	0	0	1	1	0	0	0	72.2	2	45	#NULL!	5.27	4.06	77	134	2	2	4.51	2	41.2	0.75	271	2	0.27	9.9	4.69	3.27	0.99	1	10.2	20
1	4573	2022-10-30 11:40:34	1	0	21.2306	75	2	female	2	1.58	53	No	Married	1	#NULL!	0	Reproductive System	0	0	1	0	1	0	0	0	71.5	2	43.4	#NULL!	5.65	3.87	68.5	147	2	1	4.76	2	43.6	1.31	232	2	0.24	10.4	#NULL!	#NULL!	#NULL!	#NULL!	9.1	32
1	4567	2022-10-30 17:18:47	1	0	22.6562	65	1	female	2	1.6	58	No	Married	1	#NULL!	0	Endocrine System	0	0	1	0	1	0	0	0	57.6	1	37.9	#NULL!	5.78	4.46	77.2	122	2	2	4.1	2	38.8	0.79	192	2	0.17	9	4.67	0.97	1.41	0	6.3	12
1	4597	2022-10-31 08:45:23	1	0	21.6713	68	1	male	1	1.65	59	No	Married	1	#NULL!	0	Blood System	4	0	0	0	0	0	0	0	52.4	1	33.2	#NULL!	3.73	3.08	82.8	110	1	2	4.13	2	35.8	0.47	118	2	0.1	8.1	#NULL!	#NULL!	#NULL!	#NULL!	3.4	20
1	4589	2022-11-01 08:25:38	2	1	17.1468	83	4	female	2	1.62	45	No	Married	1	#NULL!	0	Digestive System	4	0	0	0	0	0	0	0	65.7	1	33.7	#NULL!	10.05	8.59	85.5	123	2	2	3.97	1	36.7	0.63	241	2	0.24	9.9	#NULL!	#NULL!	#NULL!	#NULL!	176.7	38
1	4569	2022-11-01 09:25:08	2	0	22.6562	75	2	male	1	1.6	58	No	Other	3	#NULL!	0	Respiratory System	0	0	0	1	0	0	0	0	71.3	2	42.8	#NULL!	7.19	5.39	75.1	173	2	2	5.82	2	53.8	1.38	185	2	0.2	10.7	5.89	2.01	0.93	#NULL!	15.8	28
1	4668	2022-11-02 09:25:57	1	0	25.2174	66	1	male	1	1.63	67	No	Married	1	#NULL!	0	Respiratory System	4	0	0	0	0	0	0	0	73.1	2	45	#NULL!	3.95	2.49	62.9	146	2	1	4.44	2	44.5	0.97	168	2	0.14	8.5	4.4	1.82	0.97	1	19.9	47
1	4612	2022-11-02 09:50:53	1	0	23.4375	80	3	male	1	1.6	60	No	Married	1	#NULL!	0	Respiratory System	4	0	1	1	1	1	0	0	71.8	2	33.5	#NULL!	10.93	8.38	76.8	118	1	2	4.24	2	36	1.6	436	3	0.37	8.4	2.98	0.85	0.93	1	5.3	51
1	4550	2022-11-03 09:50:44	1	0	26.6667	65	1	female	2	1.5	60	No	Married	1	#NULL!	0	Digestive System	0	1	0	0	0	0	0	0	68.8	2	40	#NULL!	3.09	2.05	66.3	111	1	1	3.7	1	35.2	0.77	100	2	0.09	8.6	#NULL!	#NULL!	#NULL!	#NULL!	7.8	13
1	4634	2022-11-04 10:05:48	1	1	20.0692	70	1	male	1	1.7	58	No	Married	1	#NULL!	0	Respiratory System	4	0	0	0	0	0	0	0	72.2	2	38.1	#NULL!	7.7	5.05	65.6	105	1	2	3.33	1	33.3	1.39	196	2	0.18	9.1	4.99	1.29	0.99	1	8.5	11
1	4648	2022-11-05 09:09:20	1	1	#NULL!	79	3	female	2	1.43	#NULL!	Yes	Widowed	0	#NULL!	0	Digestive System	0	0	1	0	0	0	0	1	53.4	1	26.8	#NULL!	4.57	3.29	72	65	1	2	2.65	1	21.7	0.96	202	2	0.17	8.6	#NULL!	#NULL!	#NULL!	#NULL!	8.7	15
1	4580	2022-11-05 09:17:43	1	1	23.8751	65	1	male	1	1.65	65	No	Married	1	#NULL!	0	Digestive System	0	0	0	0	0	1	0	1	63.5	1	27.2	84	9.27	7.69	83	97	1	2	2.91	1	30.1	1.22	84	1	0.09	10.8	#NULL!	#NULL!	#NULL!	#NULL!	81.5	118
1	4636	2022-11-05 09:39:57	1	0	24.974	80	3	female	2	1.55	60	No	Married	1	#NULL!	0	Respiratory System	0	1	1	0	0	0	0	0	75.5	2	45	#NULL!	5.17	2.62	50.6	137	2	1	4.67	2	43	2.04	233	2	0.23	9.9	#NULL!	#NULL!	#NULL!	#NULL!	4.3	21
1	4671	2022-11-05 09:45:02	1	0	26.0375	79	3	male	1	1.58	65	No	Married	1	#NULL!	0	Reproductive System	4	0	1	1	1	0	0	0	61.6	1	31.2	#NULL!	8.62	5.98	69.4	156	2	2	5.47	2	49	1.52	229	2	0.24	10.5	#NULL!	#NULL!	#NULL!	#NULL!	10.9	19
1	4623	2022-11-05 10:56:39	1	0	22.2222	76	3	female	2	1.5	50	No	Married	1	#NULL!	0	Respiratory System	4	0	0	0	0	0	0	0	71.3	2	38.7	#NULL!	4.55	3.24	71.3	105	1	2	3.22	1	32	0.88	81	1	0.08	9.8	3.97	0.79	1.46	0	6.4	39
1	4659	2022-11-05 11:29:56	1	1	20.0692	67	1	male	1	1.7	58	No	Married	1	#NULL!	0	Respiratory System	4	0	0	0	0	0	0	0	67	1	41.5	#NULL!	4.5	2.9	64.5	136	2	1	4.26	2	42	1.14	106	2	0.12	11.6	5.93	1.18	1.81	#NULL!	7.4	19
1	4601	2022-11-06 09:10:59	1	0	23.7253	75	2	female	2	1.55	57	No	Married	1	#NULL!	0	Reproductive system	0	0	1	1	0	0	0	0	71	2	37.6	#NULL!	5.09	3.12	61.5	118	1	1	4.03	2	38.5	1.58	125	2	0.17	13.7	#NULL!	#NULL!	#NULL!	#NULL!	3.1	21
1	4613	2022-11-06 11:07:19	1	0	23.6128	68	1	female	2	1.54	56	No	Married	1	#NULL!	0	Respiratory System	0	1	1	0	1	0	0	0	71.8	2	42.2	#NULL!	4.42	3.96	89.5	165	2	2	5.84	2	52	0.43	250	2	0.26	10.2	5	0.64	1.6	0	7.4	47
1	4604	2022-11-06 11:16:14	1	1	19.5918	77	3	male	1	1.75	60	No	Married	1	#NULL!	0	Urinary System	4	0	0	0	0	1	0	0	50.4	1	24.3	104	16	15.06	94.1	99	1	2	4.79	2	31.5	0.6	122	2	#NULL!	#NULL!	2.3	1.01	0.82	1	10.2	25
1	4586	2022-11-06 12:02:54	1	1	20.0692	73	2	male	1	1.7	58	No	Married	1	#NULL!	0	Urinary System	0	1	0	0	0	1	0	0	62	1	41.7	#NULL!	375.6	2.46	51.6	145	2	1	52181.4	2	43.9	1.96	103	2	0.11	13.5	#NULL!	#NULL!	#NULL!	#NULL!	7.3	43
1	4590	2022-11-07 08:34:42	1	1	22.8928	75	2	female	2	1.55	55	No	Married	1	#NULL!	0	Digestive System	4	0	0	0	0	0	0	1	52.4	1	28	#NULL!	7.75	6.59	84.9	97	1	2	3.34	1	29.5	0.66	179	2	0.14	7.8	#NULL!	#NULL!	#NULL!	#NULL!	21.8	15
1	4666	2022-11-07 08:59:50	1	1	19.1111	81	4	male	1	1.5	43	No	Married	1	#NULL!	0	Respiratory System	4	0	1	0	0	0	0	0	81	2	43	#NULL!	3.51	1.51	43.1	103	1	1	3.3	1	32.5	1.61	235	2	0.2	8.6	5.34	1.46	1.41	#NULL!	5	21
1	4656	2022-11-07 09:14:18	2	0	21.4536	73	2	male	1	1.63	57	No	Married	1	#NULL!	0	Skin & Appendages	4	1	0	0	0	0	0	0	75.9	2	45.1	#NULL!	6.32	4.55	72	155	2	1	4.83	2	47.7	1.44	206	2	0.24	11.5	6.16	3.19	1.07	#NULL!	13.5	59
1	4456	2022-11-07 09:29:26	2	0	22.4323	78	3	female	2	1.58	56	No	Married	1	#NULL!	0	Digestive System	0	0	0	1	0	0	0	0	69.5	2	43.9	#NULL!	6.83	4.91	71.9	106	1	2	3.71	1	34	1.31	279	2	0.29	10.3	#NULL!	#NULL!	#NULL!	#NULL!	14.5	21
1	4614	2022-11-07 09:52:29	2	1	20	84	4	male	1	1.5	45	No	Married	1	#NULL!	0	Digestive System	4	0	0	0	0	0	0	0	68.9	2	33.1	#NULL!	7.15	5.82	81.5	102	1	2	3.18	1	32.4	0.61	315	3	0.26	8.4	3.55	0.87	0.74	1	20.8	42
1	4651	2022-11-07 12:02:46	1	0	22.7732	75	2	male	1	1.65	62	No	Married	1	#NULL!	0	Digestive System	0	0	0	0	0	0	0	0	61.2	1	35.1	#NULL!	3.96	2.66	67.1	143	2	1	4.43	2	42.6	0.92	226	2	0.19	8.5	#NULL!	#NULL!	#NULL!	#NULL!	141.1	44
1	4719	2022-11-07 15:46:47	1	0	22.2656	70	1	female	2	1.6	57	No	Married	1	#NULL!	0	Respiratory System	4	0	0	0	0	0	0	0	71.2	2	42.4	#NULL!	3.35	1.69	50.4	134	2	1	4.37	2	41	1.29	267	2	0.25	9.4	5.22	2.25	1.2	#NULL!	10	13
1	4615	2022-11-08 08:54:21	2	1	20.0692	84	4	male	1	1.7	58	No	Married	1	#NULL!	0	Digestive System	4	0	1	0	0	0	0	0	63.6	1	35	#NULL!	4.78	3	62.7	137	2	1	4.62	2	41.9	1.27	164	2	0.15	8.9	5.14	1.58	1.35	0	23.1	29
1	4621	2022-11-08 09:54:26	1	0	20.8889	66	1	female	2	1.5	47	No	Other	3	#NULL!	0	Digestive System	0	1	0	0	0	0	0	0	73.5	2	38.9	#NULL!	3.79	1.86	48.8	129	2	1	3.95	1	39.6	1.36	258	2	0.2	7.6	6.05	0.97	1.55	#NULL!	6.6	34
1	4670	2022-11-08 10:13:44	1	1	19.721	71	2	male	1	1.67	55	No	Married	1	#NULL!	0	Respiratory System	4	0	1	1	0	0	0	0	72.2	2	42.5	#NULL!	3.48	1.89	54.6	123	2	1	3.95	1	38.2	0.97	186	2	0.15	8.1	3.94	1.09	1.38	0	9.4	9
1	4732	2022-11-08 10:15:25	1	1	19.3878	68	1	female	2	1.4	38	No	Married	1	#NULL!	0	Respiratory System	4	0	1	0	0	0	0	0	68.3	2	42.3	#NULL!	3.92	2.33	59.2	121	2	1	4.22	2	37.4	1.08	206	2	0.18	8.5	4.56	1.95	1.1	1	4.5	17
1	4608	2022-11-08 11:39:00	1	1	17.9931	82	4	male	1	1.7	52	No	Widowed	0	#NULL!	0	Reproductive System	0	0	1	0	0	1	0	0	55.8	1	31.1	#NULL!	28.64	26.06	91.1	96	1	2	3.11	1	29	1.53	172	2	0.15	9	#NULL!	#NULL!	#NULL!	#NULL!	7	19
1	4715	2022-11-09 08:39:37	2	0	22.5895	66	1	male	1	1.65	61.5	No	Married	1	#NULL!	0	Respiratory System	4	0	0	0	0	0	0	0	69	2	43.4	#NULL!	5.73	3.75	65.6	146	2	1	4.51	2	44.1	1.31	115	2	0.12	10.7	6.46	1.29	1.49	#NULL!	11.1	37
1	4510	2022-11-09 10:18:16	2	1	19.5682	70	1	male	1	1.78	62	No	Married	1	#NULL!	0	Reproductive System	4	0	1	1	0	0	0	0	58.1	1	31.3	#NULL!	13.08	12.29	94	139	2	2	4.54	2	42.6	0.56	151	2	0.15	10	5.15	1.12	0.95	1	7.6	15
1	4718	2022-11-10 09:35:01	1	0	21.3599	81	4	female	2	1.59	54	No	Widowed	0	#NULL!	0	Respiratory system	4	0	0	0	0	0	0	0	65.7	1	33.8	#NULL!	3.89	2.51	64.6	98	1	1	3.23	1	30	1	238	2	0.21	8.9	5.11	1.07	1.28	0	5.8	10
1	4610	2022-11-10 09:44:13	2	0	22.8329	71	2	male	1	1.58	57	No	Married	1	#NULL!	0	Digestive System	4	0	0	0	0	0	0	0	73.5	2	37.9	#NULL!	8.62	5.88	68.1	139	2	2	4.57	2	41.6	1.81	195	2	0.2	10.1	9.43	2.07	0.9	#NULL!	22.8	67
1	4706	2022-11-10 09:49:55	1	1	#NULL!	74	2	male	1	#NULL!	#NULL!	Yes	Married	1	#NULL!	0	Digestive System	0	1	0	0	0	0	0	0	73.1	2	40.7	#NULL!	5.79	3.49	60.3	135	2	1	3.78	1	40.4	1.47	83	1	0.07	8.3	3.67	1.21	0.93	1	20.7	58
1	4650	2022-11-10 11:20:46	1	1	#NULL!	83	4	female	2	1.52	#NULL!	Yes	Widowed	0	#NULL!	0	Digestive System	4	0	1	1	0	0	0	1	64	1	21.5	#NULL!	4.96	4.03	81.2	126	2	2	3.66	1	38.1	0.54	57	1	0.06	11.2	#NULL!	#NULL!	#NULL!	#NULL!	96.9	138
1	4643	2022-11-11 08:18:57	1	1	18.7783	71	2	male	1	1.68	53	No	Married	1	#NULL!	0	Respiratory System	0	0	0	1	0	0	0	0	60	1	37.7	#NULL!	4.57	3.33	72.7	156	2	2	4.69	2	46.2	0.88	71	1	0.08	11.3	5.16	0.95	1.68	0	9.5	47
1	4689	2022-11-11 09:30:51	2	0	26.0375	70	1	female	2	1.58	65	No	Married	1	#NULL!	0	Reproductive System	0	1	0	0	0	0	0	0	78.9	2	41.8	#NULL!	5.77	3.7	64.1	129	2	1	4.14	2	40.3	1.41	176	2	0.21	12.1	#NULL!	#NULL!	#NULL!	#NULL!	6.6	22
1	4712	2022-11-11 09:31:04	1	0	20.8117	74	2	male	1	1.55	50	No	Married	1	#NULL!	0	Respiratory System	4	0	0	0	0	0	0	0	73.3	2	39.8	#NULL!	4.63	3.13	67.7	115	1	1	3.76	1	34.8	1.01	208	2	0.19	9.3	4.34	0.79	1.4	0	14.2	22
1	4606	2022-11-11 15:00:03	1	1	16.6732	70	1	male	1	1.67	46.5	No	Married	1	#NULL!	0	Respiratory System	0	0	0	0	0	0	0	0	61.4	1	33.4	#NULL!	3.98	2.29	57.7	132	2	1	4.16	2	41.2	0.93	214	2	0.19	8.7	3.35	0.47	0.92	1	4.1	35
1	4675	2022-11-11 18:41:36	2	1	19.8141	67	1	female	2	1.62	52	No	Married	1	#NULL!	0	Respiratory System	0	0	0	0	0	0	0	0	58	1	37.4	#NULL!	3.47	1.94	55.8	117	1	1	4.1	2	37	1.19	129	2	0.12	9.6	6.3	1.77	1.06	#NULL!	4.1	14
1	4691	2022-11-12 09:34:08	1	0	25.5102	70	1	male	1	1.68	72	No	Married	1	#NULL!	0	Digestive system	0	1	0	0	0	0	0	0	75.8	2	43.3	#NULL!	5.12	2.37	46.2	139	2	1	5.03	2	43.3	2.08	257	2	0.21	8.2	#NULL!	#NULL!	#NULL!	#NULL!	8.3	28
1	4740	2022-11-12 10:56:01	1	0	29.2969	79	3	male	1	1.6	75	No	Married	1	#NULL!	0	Reproductive System	0	0	0	0	0	0	0	0	71.9	2	45.7	#NULL!	8.8	4.9	67.2	154	2	1	6.3	2	47	1.83	187	2	0.19	10.1	#NULL!	#NULL!	#NULL!	#NULL!	13.4	19
1	4653	2022-11-12 11:15:01	1	0	27.1203	72	2	female	2	1.56	66	No	Married	1	#NULL!	0	Respiratory System	4	0	0	1	0	0	0	0	48.8	1	29	#NULL!	4.11	2.64	64.2	113	1	1	3.81	1	35	1.02	203	2	0.21	10.6	5.89	3.05	1.06	#NULL!	4.4	23
1	4731	2022-11-12 11:38:26	1	0	23.1111	78	3	female	2	1.5	52	No	Married	1	#NULL!	0	Reproductive System	0	0	0	0	0	0	0	0	60.3	1	34.1	#NULL!	5.67	3.53	62.3	129	2	1	3.97	1	40	1.36	138	2	0.16	11.6	#NULL!	#NULL!	#NULL!	#NULL!	3.1	11
1	4688	2022-11-13 08:40:39	1	1	20.0692	67	1	male	1	1.7	58	No	Married	1	#NULL!	0	Respiratory System	0	1	1	0	0	0	0	0	81.8	2	55.9	#NULL!	5.54	3.89	70.2	193	2	1	5.85	2	55.8	1.24	200	2	0.23	11.5	#NULL!	#NULL!	#NULL!	#NULL!	27.6	25
1	4725	2022-11-13 08:42:24	1	0	21.7778	81	4	female	2	1.5	49	No	Widowed	0	#NULL!	0	Digestive System	4	0	1	0	0	0	0	0	76.9	2	42.5	#NULL!	4.92	3.89	79.2	107	1	2	3.4	1	33.7	0.77	256	2	0.19	7.4	7.46	1.81	1.75	#NULL!	10.7	17
1	4682	2022-11-13 10:27:38	2	0	21.9671	80	3	male	1	1.68	62	No	Married	1	#NULL!	0	Respiratory System	4	0	0	0	1	0	0	0	68.5	2	35.8	#NULL!	6.17	3.58	58	145	2	1	4.58	2	42.7	1.79	405	3	0.3	7.4	3.39	1.33	0.82	1	5.9	61
1	4694	2022-11-13 11:15:47	2	0	22.2222	65	1	female	2	1.5	50	No	Married	1	#NULL!	0	Digestive System	4	0	1	1	1	0	0	0	69.5	2	37.7	#NULL!	3.16	1.4	43.9	96	1	1	4.01	2	29.5	1.16	230	2	0.22	9.6	#NULL!	#NULL!	#NULL!	#NULL!	8.2	12
1	4637	2022-11-13 12:01:01	1	0	24.4444	74	2	female	2	1.5	55	No	Widowed	1	#NULL!	0	Respiratory System	4	0	0	0	0	0	0	0	71.7	2	40.8	#NULL!	5.67	2.99	52.8	142	2	1	4.46	2	43.7	2.28	261	2	0.22	8.4	#NULL!	#NULL!	#NULL!	#NULL!	8	11
1	4709	2022-11-14 09:08:50	1	0	24.7409	78	3	male	1	1.67	69	No	Widowed	0	#NULL!	0	Skin & Appendages	0	0	1	1	0	0	0	0	71.8	2	40.8	#NULL!	9.6	4.56	47.5	145	2	1	4.54	2	42.5	4.03	289	2	0.28	9.7	4.41	3.06	0.87	1	7.6	26
1	4458	2022-11-14 10:37:26	1	0	21.0938	70	1	male	1	1.6	54	No	Married	1	#NULL!	0	Digestive System	0	1	0	0	0	0	0	1	33.9	1	25.7	#NULL!	7.21	4.85	67.2	95	1	1	3.27	1	29	1.8	270	2	0.23	8.7	3.98	1.04	0.76	1	9.8	7
1	4630	2022-11-14 11:05:47	1	1	20.2632	75	2	male	1	1.64	54.5	No	Married	1	#NULL!	0	Digestive System	0	0	1	0	0	0	0	0	73.8	2	41.2	212	4.65	3.39	73	147	2	2	4.74	2	43	0.86	109	2	0.13	12	5.65	0.81	1.63	#NULL!	9.4	30
1	4681	2022-11-15 09:04:13	1	1	14.1994	69	1	male	1	1.57	35	No	Married	1	#NULL!	0	Digestive System	0	0	0	0	0	0	0	0	60.4	1	40.3	#NULL!	5.69	2.35	41.3	147	2	1	4.51	2	44	2.72	235	2	0.22	9.2	5.65	1.03	1.99	#NULL!	8	21
1	4762	2022-11-15 11:54:41	2	0	24.2215	75	2	male	1	1.7	70	No	Married	1	#NULL!	0	Respiratory System	0	0	1	0	1	1	0	0	69.8	2	41.7	#NULL!	4.4	2.46	55.9	121	2	1	3.92	1	36	1.23	136	2	0.12	8.7	4.56	1.56	0.88	1	9.8	13
1	4708	2022-11-16 09:03:11	1	0	26.0584	79	3	male	1	1.53	61	No	Married	1	#NULL!	0	Digestive System	0	1	0	0	0	1	0	0	72.2	2	42.2	#NULL!	5.64	3.97	70.3	162	2	2	5.02	2	48.8	1.05	224	2	0.22	10	4.21	1.53	1.12	1	9.7	20
1	4835	2022-11-16 09:43:07	1	0	25	74	2	male	1	1.6	64	No	Married	1	#NULL!	0	Respiratory System	4	0	0	0	0	0	0	0	83.3	2	46.7	231	9.1	6.16	67.6	154	2	1	5.14	2	49	2.09	339	3	0.29	8.5	4.27	1.21	1.29	0	9.6	23
1	4704	2022-11-17 09:14:06	1	1	18.1252	80	3	male	1	1.71	53	No	Married	1	#NULL!	0	Respiratory System	0	0	1	0	0	0	0	0	66.4	1	42.4	#NULL!	5.1	2.2	43.1	138	2	1	3.95	1	39	2.29	125	2	0.15	12.3	#NULL!	#NULL!	#NULL!	#NULL!	10.7	32
1	4720	2022-11-17 09:26:13	2	1	19.1111	68	1	female	2	1.5	43	No	Married	1	#NULL!	0	Endocrine System	4	0	0	1	0	0	0	0	78.6	2	47.4	#NULL!	4.13	3.12	75.5	140	2	2	4.33	2	43.1	0.63	120	2	0.13	10.8	4.11	1.18	1.68	0	13.2	23
1	4549	2022-11-17 09:37:43	2	1	19.1953	70	1	female	2	1.63	51	No	Married	1	#NULL!	0	Hematologic System	4	0	0	0	0	0	0	0	60	1	39.9	#NULL!	3.45	1.75	50.8	88	1	1	2.58	1	28.8	1.35	176	2	0.16	8.8	4.81	1.13	1.43	0	4.7	17
1	4774	2022-11-17 10:03:28	1	0	21.1927	79	3	male	1	1.64	57	No	Married	1	#NULL!	0	Respiratory System	4	1	1	1	0	0	0	0	74.1	2	45.5	#NULL!	5.14	3.35	65.1	142	2	1	4.75	2	43.9	1.14	155	2	0.16	10.2	5.38	1.48	1.33	#NULL!	6.4	37
1	4734	2022-11-17 11:10:51	1	1	18.0662	77	3	male	1	1.63	48	No	Other	3	#NULL!	0	Respiratory System	4	0	0	0	0	0	0	1	71.5	2	29.8	#NULL!	5.83	4.96	85	127	2	2	3.93	1	40.1	0.37	296	2	0.26	8.8	3.88	1.04	0.81	1	12.5	34
1	4687	2022-11-18 08:40:50	1	0	26.6667	75	2	female	2	1.5	60	No	Married	1	#NULL!	0	Digestive System	4	0	1	0	0	0	0	0	77	2	42.3	#NULL!	6.77	4.43	65.4	142	2	1	4.5	2	40.9	1.91	240	2	0.24	10.1	#NULL!	#NULL!	#NULL!	#NULL!	9.2	33
1	4716	2022-11-18 08:51:15	1	1	19.0311	87	5	male	1	1.7	55	No	Widowed	0	#NULL!	0	Respiratory System	4	1	1	0	0	0	0	0	65.9	1	37.7	#NULL!	9.21	7.56	82.1	159	2	2	5.39	2	47	1.07	186	2	0.16	8.6	#NULL!	#NULL!	#NULL!	#NULL!	14.3	25
1	4832	2022-11-18 09:19:11	1	1	20	79	3	female	2	1.5	45	No	Married	1	#NULL!	0	Digestive System	4	0	1	1	0	0	0	0	83.1	2	36.7	#NULL!	4.15	2.21	53.1	118	1	1	3.73	1	36.6	1.25	137	2	0.1	7.3	5.04	2.77	0.99	1	9.7	10
1	4728	2022-11-18 09:30:36	1	0	27.5556	66	1	female	2	1.5	62	No	Married	1	#NULL!	0	Digestive System	0	1	0	0	0	0	0	0	75.9	2	43.5	#NULL!	4.13	2.85	69	127	2	2	4.02	2	38.3	0.83	147	2	0.12	7.8	4.81	1.55	1.42	0	7.1	26
1	4629	2022-11-18 11:54:38	1	0	23.9512	74	2	male	1	1.66	66	No	Other	3	#NULL!	0	Respiratory System	0	0	0	1	0	0	0	0	74.4	2	45.7	#NULL!	5.58	2.12	38	146	2	1	4.7	2	42	2.28	117	2	0.12	10.5	4.5	1.62	1.26	0	7.7	20
1	4813	2022-11-19 10:49:29	1	1	20.8209	78	3	male	1	1.64	56	No	Married	1	#NULL!	0	Urinary System	0	0	1	0	0	0	0	0	58.4	1	35.6	#NULL!	33.5	4.51	69.2	142	2	2	302.8	2	42.8	1.28	217	2	0.19	8.7	#NULL!	#NULL!	#NULL!	#NULL!	23.6	19
1	4758	2022-11-20 10:21:18	1	0	28.5375	81	4	female	2	1.45	60	No	Married	1	#NULL!	0	Respiratory System	0	0	1	1	1	0	0	0	75.1	2	37.9	#NULL!	4.07	2.68	65.6	135	2	1	4.42	2	41.4	1.05	207	2	0.22	10.5	#NULL!	#NULL!	#NULL!	#NULL!	6.1	12
1	4702	2022-11-20 11:12:03	1	0	20.7612	66	1	male	1	1.7	60	No	Married	1	#NULL!	0	Respiratory System	4	0	0	0	0	0	0	0	60.9	1	37.7	#NULL!	8.14	6.6	81.1	125	2	2	4.28	2	37	0.89	172	2	0.21	12.4	3.99	0.94	1.05	1	12.5	20
1	4775	2022-11-21 10:14:27	1	0	21.3382	84	4	male	1	1.62	56	No	Married	1	#NULL!	0	Reproductive System	4	0	0	0	0	0	0	1	64	1	40.1	#NULL!	7.14	4.5	62.9	156	2	1	5.03	2	47.7	2.06	191	2	0.21	10.8	#NULL!	#NULL!	#NULL!	#NULL!	6.2	10
1	4705	2022-11-21 10:58:00	2	1	17.4747	76	3	male	1	1.64	47	No	Other	3	#NULL!	0	Digestive System	4	0	0	1	0	0	0	1	51.3	1	28.9	#NULL!	5.4	4.12	76.3	127	2	2	3.74	1	37	0.7	56	1	0.07	12.6	2.94	1.07	1.25	0	41.3	52
1	4805	2022-11-22 08:55:44	1	0	24.0346	70	1	male	1	1.58	60	No	Married	1	#NULL!	0	Digestive System	0	0	0	0	0	0	0	0	68	1	43.6	#NULL!	7.54	3.33	44.1	157	2	1	4.73	2	48	1.24	147	2	0.15	10.4	3.64	0.61	1.22	0	14.2	32
1	4727	2022-11-22 09:19:06	1	0	20.9366	67	1	male	1	1.65	57	No	Married	1	#NULL!	0	Digestive System	0	0	1	0	0	0	0	0	70.2	2	36.1	#NULL!	7.3	6.17	69.1	156	2	1	0	2	47.4	1.99	169	2	0.17	10.2	7.22	1.5	1.2	#NULL!	30.4	85
1	4785	2022-11-22 09:20:50	1	0	25.9107	74	2	male	1	1.62	68	No	Married	1	#NULL!	0	Blood System	4	1	0	0	0	0	0	0	105.5	2	28.6	#NULL!	8.22	5.1	62	81	1	1	2.39	1	25.4	2.52	122	2	0.1	8.7	#NULL!	#NULL!	#NULL!	#NULL!	6.5	14
1	4747	2022-11-22 09:23:52	1	0	22.6667	79	3	male	1	1.5	51	No	Married	1	#NULL!	0	Reproductive System	0	0	0	0	1	0	0	0	67.1	1	44.2	#NULL!	3.89	2.16	55.2	122	2	1	3.81	1	37.8	1.19	114	2	0.13	11.6	#NULL!	#NULL!	#NULL!	#NULL!	10.9	29
1	4824	2022-11-22 14:54:32	2	1	17.5781	67	1	male	1	1.6	45	No	Married	1	#NULL!	0	Respiratory System	4	0	0	0	1	0	0	0	54.1	1	28.1	#NULL!	7.98	5.39	67.5	93	1	1	3.5	1	30.6	2.12	467	3	0.31	6.6	#NULL!	#NULL!	#NULL!	#NULL!	3.5	24
1	4733	2022-11-23 08:53:40	2	1	18.7328	72	2	male	1	1.65	51	No	Married	1	#NULL!	0	Digestive System	4	0	0	0	0	1	0	1	33.1	1	31.5	#NULL!	4.78	2.8	58.5	123	2	1	5.02	2	39.1	0.93	58	1	0.06	10.1	#NULL!	#NULL!	#NULL!	#NULL!	22.2	21
1	4829	2022-11-23 11:32:22	1	0	23.1834	67	1	male	1	1.7	67	No	Married	1	#NULL!	0	Digestive System	0	0	1	1	0	0	0	0	58.4	1	36.2	#NULL!	3.31	2.71	81.9	114	1	2	3.52	1	35	0.37	121	2	0.13	10.8	2.63	0.69	0.79	1	6.8	25
1	4759	2022-11-23 12:06:51	1	0	26.5731	71	2	male	1	1.68	75	No	Married	1	#NULL!	0	Respiratory System	4	0	1	1	1	0	0	0	69.2	2	42.2	#NULL!	8.83	5.48	62	157	2	1	5.25	2	49.3	2.04	252	2	0.33	13	2.67	1.05	0.83	1	5.9	12
1	4806	2022-11-24 09:57:30	1	1	19.5312	75	2	male	1	1.6	50	No	Married	1	#NULL!	0	Digestive System	4	1	1	0	0	0	0	0	81.7	2	45	#NULL!	7.18	5.35	74.5	163	2	2	5.27	2	45.9	1.17	189	2	0.2	10.3	#NULL!	#NULL!	#NULL!	#NULL!	12.5	27
1	4815	2022-11-24 10:01:36	2	0	31.5886	80	3	male	1	1.65	86	No	Married	1	#NULL!	0	Respiratory System	4	0	1	1	1	0	0	0	76.8	2	36.9	#NULL!	14.51	11.33	78.1	117	1	2	4.2	2	37	1.99	421	3	0.4	9.4	3.78	1.41	1	1	7.4	23
1	4765	2022-11-24 10:04:14	1	0	23.8751	71	2	male	1	1.65	65	No	Married	1	#NULL!	0	Respiratory System	0	0	0	0	0	0	0	0	73.8	2	42.7	#NULL!	7.87	4.8	61.1	161	2	1	5.12	2	49.9	2.32	144	2	0.19	13	6.12	1.17	1.24	#NULL!	9	32
1	4757	2022-11-24 10:12:32	1	0	25.3515	77	3	male	1	1.72	75	No	Married	1	#NULL!	0	Reproductive System	0	0	0	1	0	0	0	0	75.3	2	41.4	#NULL!	1.3	5.58	51.5	139	2	1	0	2	43	3.8	326	3	0.33	10.2	#NULL!	#NULL!	#NULL!	#NULL!	13.4	13
1	4840	2022-11-24 11:04:40	1	1	19.5918	66	1	male	1	1.75	60	No	Married	1	#NULL!	0	Digestive System	0	0	0	0	0	1	0	0	52.9	1	25.5	#NULL!	8.79	7.41	84.3	113	1	2	3.96	1	33.5	0.92	207	2	0.18	8.9	3.11	1.28	0.38	1	16.7	77
1	4886	2022-11-25 08:36:20	1	1	17.9902	84	4	male	1	1.78	57	No	Married	1	#NULL!	0	Digestive System	4	0	1	0	0	0	0	0	67.9	1	37.3	#NULL!	6.32	4.43	70	142	2	2	4.69	2	43.2	1.27	130	2	0.13	9.7	#NULL!	#NULL!	#NULL!	#NULL!	29.9	19
1	4873	2022-11-25 08:45:12	2	0	24.3865	74	2	male	1	1.62	64	No	Married	1	#NULL!	0	Blood System	4	0	0	0	0	0	0	0	67.8	1	42.5	#NULL!	25.75	4.15	16.1	136	2	1	4.77	2	43.3	20.91	98	1	0.1	11.3	#NULL!	#NULL!	#NULL!	#NULL!	11.5	9
1	4810	2022-11-25 11:08:31	1	1	19.2653	82	4	male	1	1.75	59	No	Married	1	#NULL!	0	Reproductive System	0	0	0	0	0	0	0	0	63.4	1	37.4	#NULL!	5.92	3.55	60	111	1	1	3.85	1	35	1.53	317	3	0.3	9.5	#NULL!	#NULL!	#NULL!	#NULL!	4.9	16
1	4819	2022-11-26 09:59:23	2	0	22.2656	71	2	male	1	1.6	57	No	Married	1	#NULL!	0	Digestive System	4	0	0	0	0	0	0	0	79.3	2	42	#NULL!	5.69	3.39	59.8	150	2	1	4.9	2	45.4	1.71	202	2	0.18	9.1	#NULL!	#NULL!	#NULL!	#NULL!	15.1	54
1	4879	2022-11-26 11:20:31	2	0	21.7778	67	1	female	2	1.5	49	No	Married	1	#NULL!	0	Respiratory System	4	0	1	0	0	0	0	0	65.7	1	41.4	#NULL!	7.08	4.93	69.7	119	1	2	4.09	2	37.2	1	226	2	0.2	8.7	3.88	1.81	0.9	1	11	25
1	4807	2022-11-27 08:31:11	2	0	24.0741	67	1	male	1	1.8	78	No	Married	1	#NULL!	0	Digestive System	0	1	0	0	0	0	0	0	71.5	2	38.1	#NULL!	3.95	2.98	75.4	132	2	2	3.94	1	39.4	0.63	124	2	0.1	8	#NULL!	#NULL!	#NULL!	#NULL!	9.1	25
1	4804	2022-11-27 09:19:12	1	0	24.1672	65	1	male	1	1.64	65	No	Married	1	#NULL!	0	Reproductive System	0	0	1	0	0	1	0	0	72.3	2	42.9	#NULL!	635.2	5.01	66.9	154	2	2	5157.7	2	45.9	1.54	206	2	0.2	9.7	#NULL!	#NULL!	#NULL!	#NULL!	15.4	23
1	4784	2022-11-27 09:29:34	1	0	26.2188	77	3	male	1	1.68	74	No	Married	1	#NULL!	0	Digestive System	4	0	1	1	1	0	0	0	74.7	2	45	296	4.43	3.14	71	147	2	2	4.55	2	43.6	0.73	171	2	0.14	8.1	4.75	2.72	1.2	1	6.3	19
1	4693	2022-11-28 08:44:28	1	1	18.7783	71	2	male	1	1.68	53	No	Married	1	#NULL!	0	Respiratory System	0	0	0	1	0	0	0	0	61.8	1	38.5	#NULL!	5.89	4.45	75.6	158	2	2	4.85	2	46	1.05	92	1	0.12	12.8	6.39	1.89	1.74	#NULL!	9.2	30
1	4808	2022-11-28 09:39:03	2	0	26.9274	74	2	male	1	1.68	76	No	Married	1	#NULL!	0	Respiratory System	0	0	0	0	0	0	0	0	79.9	2	48.1	#NULL!	6.07	4.81	79.2	149	2	2	4.83	2	44.1	0.69	209	2	0.27	12.8	#NULL!	#NULL!	#NULL!	#NULL!	25.1	27
1	4783	2022-11-28 10:05:23	1	1	18.4661	71	2	male	1	1.67	51.5	No	Married	1	#NULL!	0	Respiratory System	0	1	0	0	0	0	0	0	58.8	1	28.9	#NULL!	11.59	9.26	79.8	142	2	2	4.89	2	42.9	1.59	356	3	0.4	11.3	#NULL!	#NULL!	#NULL!	#NULL!	7.2	19
1	4780	2022-11-28 10:06:21	2	0	22.6562	77	3	male	1	1.6	58	No	Married	1	#NULL!	0	Digestive System	0	1	0	0	0	0	0	0	79.6	2	45.4	#NULL!	8.25	4.29	52	148	2	1	4.84	2	45.7	3.34	133	2	0.22	16.3	#NULL!	#NULL!	#NULL!	#NULL!	10.9	42
1	4884	2022-11-28 10:06:33	1	0	21.6413	66	1	female	2	1.52	50	No	Other	3	#NULL!	0	Digestive System	0	1	0	0	0	0	0	0	75.5	2	40.4	#NULL!	3.21	1.47	45.7	137	2	1	4.25	2	42.4	1.19	258	2	0.19	7.3	#NULL!	#NULL!	#NULL!	#NULL!	5.5	28
1	4814	2022-11-28 14:35:09	2	0	23.5556	68	1	female	2	1.5	53	No	Married	1	#NULL!	0	Respiratory System	0	0	1	0	1	0	0	0	67	1	38.3	#NULL!	4.58	2.49	54.5	107	1	1	3.93	1	34.3	1.65	168	2	0.19	11.2	3.57	0.78	1.36	0	3.9	22
1	4856	2022-11-28 15:10:37	1	1	19.721	71	2	male	1	1.67	55	No	Married	1	#NULL!	0	Respiratory System	4	0	1	1	0	0	0	0	70.7	2	44.5	#NULL!	6.06	3.86	63.7	124	2	1	4	1	37.4	1.34	251	2	0.21	8.4	4.01	1.19	1.28	0	8.2	13
1	4894	2022-11-29 09:21:50	1	0	21.4536	73	2	male	1	1.63	57	No	Married	1	#NULL!	0	Skin & Appendages	4	1	0	0	0	0	0	0	69.1	2	39.2	#NULL!	8.84	6.89	77.9	133	2	2	4.19	2	41	1.49	263	2	0.27	10.2	#NULL!	#NULL!	#NULL!	#NULL!	7.6	115
1	4686	2022-11-29 10:00:24	2	0	24.977	67	1	male	1	1.65	68	No	Married	1	#NULL!	0	Digestive System	0	0	0	0	0	0	0	0	73.6	2	42.4	#NULL!	4.22	1.99	47	148	2	1	4.11	2	45.1	1.46	106	2	0.13	12.3	4.2	1.59	1.01	1	12.8	98
1	4769	2022-11-29 10:09:18	1	0	22.4766	78	3	female	2	1.55	54	No	Married	1	#NULL!	0	Digestive System	0	1	0	0	0	0	0	0	61.1	1	36.3	#NULL!	4.74	2.53	53.3	99	1	1	3.96	1	32.7	1.75	295	2	0.26	8.7	#NULL!	#NULL!	#NULL!	#NULL!	9.8	16
1	4857	2022-11-29 10:14:05	2	1	18.0737	68	1	female	2	1.45	38	No	Married	1	#NULL!	0	Respiratory System	4	0	1	0	0	0	0	0	73.9	2	44.9	#NULL!	4.99	3.04	61	128	2	1	4.46	2	39.2	1.15	272	2	0.23	8.4	4.75	2.32	1.13	1	4.3	15
1	4928	2022-11-29 11:05:25	1	0	22.2222	65	1	female	2	1.5	50	No	Married	1	#NULL!	0	Digestive System	4	0	1	1	1	0	0	0	67.8	1	39.2	#NULL!	3.99	2.61	65.8	91	1	2	3.69	1	27.9	0.78	131	2	0.13	10	#NULL!	#NULL!	#NULL!	#NULL!	8.7	11
1	4796	2022-11-29 12:07:20	1	0	22.8269	68	1	female	2	1.48	50	No	Married	1	#NULL!	0	Respiratory System	0	0	1	0	0	0	0	0	74.4	2	46.9	#NULL!	6.51	4.16	63.8	126	2	1	4.05	2	39.5	1.9	248	2	0.25	9.9	4.6	1.96	1.42	1	9	34
1	4770	2022-11-30 11:56:57	1	0	22.2291	77	3	male	1	1.71	65	No	Married	1	#NULL!	0	Reproductive System	4	0	1	0	0	0	0	0	65.3	1	42.8	#NULL!	2.6	4.38	59.9	134	2	1	26.5	2	41.7	2.38	112	2	0.13	11.3	#NULL!	#NULL!	#NULL!	#NULL!	14.6	21
1	4862	2022-12-01 08:16:19	2	0	21.5139	66	1	male	1	1.67	60	No	Married	1	#NULL!	0	Respiratory System	4	0	0	0	0	0	0	0	69.8	2	43.6	#NULL!	8.6	6.93	80.6	146	2	2	4.53	2	44.5	1.09	130	2	0.13	10.3	#NULL!	#NULL!	#NULL!	#NULL!	11.8	47
1	4906	2022-12-01 09:18:19	1	1	19.0311	66	1	male	1	1.7	55	No	Divorced	4	#NULL!	0	Digestive System	0	0	0	0	0	0	0	0	88.7	2	28.9	75	4.75	3.4	71.6	91	1	2	3.36	1	29.9	1.01	165	2	0.13	8.1	#NULL!	#NULL!	#NULL!	#NULL!	38.4	26
1	4895	2022-12-01 09:47:40	1	0	24.977	70	1	male	1	1.65	68	No	Married	1	#NULL!	0	Respiratory System	0	1	0	0	0	0	0	0	62.1	1	36.9	#NULL!	12	2.92	69	125	2	2	2.7	1	38.1	0.86	194	2	0.2	10.2	#NULL!	#NULL!	#NULL!	#NULL!	18.5	32
1	4890	2022-12-01 09:53:44	1	0	26.4463	70	1	male	1	1.65	72	No	Married	1	#NULL!	0	Digestive System	0	1	0	0	0	0	0	0	71.8	2	42.5	#NULL!	4.59	1.82	39.6	133	2	1	4.87	2	42	2.17	227	2	0.2	8.9	#NULL!	#NULL!	#NULL!	#NULL!	7	33
1	4930	2022-12-02 08:39:24	1	0	442.248	74	2	male	1	0.62	170	No	Married	1	#NULL!	0	Digestive System	0	1	0	1	0	0	0	0	75.5	2	41.5	#NULL!	4.64	2.59	55.6	133	2	1	3.73	1	39.4	1.67	79	1	0.07	8.4	#NULL!	#NULL!	#NULL!	#NULL!	19.2	32
1	4848	2022-12-02 09:13:54	1	1	19.0039	89	5	male	1	1.67	53	No	Married	1	#NULL!	0	Reproductive System	4	0	0	0	0	0	0	0	61.6	1	35.5	#NULL!	4.43	2.81	63.5	116	1	1	3.73	1	35.7	1.05	164	2	0.15	9.4	4.76	1.69	0.94	1	8.2	10
1	4710	2022-12-02 09:22:32	1	0	22.0604	78	3	female	2	1.55	53	No	Widowed	0	#NULL!	0	Digestive System	0	0	1	1	0	0	0	0	79.5	2	51.7	#NULL!	14.46	13.39	92.6	146	2	2	4.95	2	42.6	0.78	206	2	0.29	14	#NULL!	#NULL!	#NULL!	#NULL!	26.9	18
1	4847	2022-12-02 10:58:38	2	1	18.7783	71	2	male	1	1.68	53	No	Married	1	#NULL!	0	Respiratory System	0	0	0	1	0	0	0	0	62.4	1	38.9	#NULL!	4.59	3.33	72.6	163	2	2	5.09	2	48	0.86	85	1	0.12	13.5	5.52	1.34	1.73	#NULL!	9.2	25
1	4871	2022-12-02 14:06:03	2	0	22.9421	68	1	female	2	1.59	58	No	Married	1	#NULL!	0	Respiratory System	0	1	1	0	1	0	0	0	59.7	1	37.2	#NULL!	4.01	2.3	57.2	138	2	1	4.75	2	43.1	1.08	249	2	0.23	9.3	#NULL!	#NULL!	#NULL!	#NULL!	9.6	47
1	4905	2022-12-03 08:43:15	1	0	22.5215	80	3	female	2	1.49	50	No	Married	1	#NULL!	0	Blood System	4	1	1	0	0	0	0	0	70.2	2	46.2	#NULL!	3.79	2.74	72.1	145	2	2	4.62	2	44.5	0.63	141	2	0.19	13.5	7.48	4.63	1.16	#NULL!	8.2	27
1	4892	2022-12-03 09:35:33	1	1	19.1001	85	4	male	1	1.65	52	No	Other	3	#NULL!	0	Digestive System	0	0	1	1	1	1	0	0	54.5	1	25.3	#NULL!	7.73	6.67	86.3	123	2	2	4.4	2	36	0.37	480	3	0.52	10.9	#NULL!	#NULL!	#NULL!	#NULL!	86.6	212
1	4885	2022-12-03 10:15:38	1	0	20.6035	74	2	male	1	1.55	49.5	No	Married	1	#NULL!	0	Respiratory System	4	0	0	0	0	0	0	0	71.7	2	40.3	#NULL!	4.75	3.06	64.4	114	1	2	3.79	1	34.7	0.93	225	2	0.21	9.4	4.28	0.69	1.41	0	14.4	17
1	4903	2022-12-03 11:57:49	1	1	18.3655	70	1	male	1	1.65	50	No	Married	1	#NULL!	0	Respiratory System	4	0	0	0	0	0	0	0	73.1	2	40.4	#NULL!	4.32	1.81	41.8	140	2	1	4.28	2	42	1.67	253	2	0.21	8.2	6	1.44	1.27	#NULL!	6.2	41
1	4922	2022-12-04 09:29:38	2	1	20.8117	94	5	female	2	1.55	50	No	Widowed	0	#NULL!	0	Digestive System	0	0	1	0	0	0	0	1	70.5	2	40.9	#NULL!	4.07	2.85	69.8	155	2	2	4.47	2	47	0.78	137	2	0.14	9.9	4.54	1.03	1.4	0	19.1	29
1	4897	2022-12-04 14:13:45	1	0	21.9713	84	4	male	1	1.72	65	No	Married	1	#NULL!	0	Reproductive System	0	0	0	0	0	1	0	0	71.7	2	39.8	#NULL!	4.62	2.1	45.5	147	2	1	4.52	2	43.9	2.04	127	2	0.14	11.3	#NULL!	#NULL!	#NULL!	#NULL!	18.2	13
1	4861	2022-12-05 08:55:57	2	1	20.3125	71	2	male	1	1.6	52	No	Married	1	#NULL!	0	Urinary System	4	0	0	0	0	0	0	0	66.2	1	36	#NULL!	5.57	4.36	78.4	111	1	2	4.29	2	34.6	0.77	111	2	0.1	9	#NULL!	#NULL!	#NULL!	#NULL!	9.7	31
1	4850	2022-12-06 08:27:21	1	0	24.8889	81	4	female	2	1.5	56	No	Married	1	#NULL!	0	Other	4	0	0	0	0	0	0	1	69.4	2	35.8	#NULL!	6.57	4.83	73.5	141	2	2	4.58	2	43.3	1.26	275	2	0.26	9.3	#NULL!	#NULL!	#NULL!	#NULL!	11	11
1	4938	2022-12-06 08:31:42	1	0	25.9107	75	2	male	1	1.62	68	No	Widowed	1	#NULL!	0	Blood System	4	0	1	0	0	0	0	0	80.3	2	32.3	#NULL!	5.55	3.81	68.6	83	1	2	2.44	1	26.8	1.15	136	2	0.13	9.9	#NULL!	#NULL!	#NULL!	#NULL!	11.7	32
1	4926	2022-12-06 08:52:42	1	0	22.2222	81	4	female	2	1.5	50	No	Widowed	0	#NULL!	0	Digestive System	4	0	1	0	0	0	0	0	71	2	41	#NULL!	3.79	2.59	68.6	106	1	1	3.2	1	32.5	0.84	238	2	0.19	7.9	#NULL!	#NULL!	#NULL!	#NULL!	11.7	14
1	4698	2022-12-07 10:13:17	1	1	19.6052	70	1	male	1	1.72	58	No	Married	1	#NULL!	0	Blood System	0	0	1	0	0	0	0	1	70.7	2	44.3	#NULL!	6.03	4.26	70.7	147	2	2	5.49	2	47.1	1.2	103	2	0.12	11.4	4.48	0.88	1.46	0	7.5	24
1	4868	2022-12-07 10:23:43	1	1	16.0256	79	3	female	2	1.56	39	No	Other	3	#NULL!	0	Digestive System	0	0	1	0	0	1	0	0	66.2	1	38.3	#NULL!	6.76	4.82	71.3	125	2	2	5.51	2	37	1.33	300	2	0.26	8.8	3.16	1.82	0.53	1	235.8	157
1	4958	2022-12-07 10:44:46	2	0	21.6441	81	4	female	2	1.55	52	No	Married	1	#NULL!	0	Respiratory System	4	0	0	0	0	0	0	0	69.6	2	36.8	#NULL!	4.04	2.44	60.5	108	1	1	3.46	1	33	1.23	177	2	0.16	9.3	4.7	1.3	1.28	0	6.5	12
1	4919	2022-12-08 09:08:40	2	0	29.4118	69	1	male	1	1.7	85	No	Married	1	#NULL!	0	Respiratory System	4	0	1	0	1	0	0	0	79.7	2	45.6	317	4.38	2.39	54.7	169	2	1	4.8	2	51.5	1.35	165	2	0.15	9	4.66	2.28	1.28	1	10	23
1	4869	2022-12-08 09:08:48	1	0	20.6612	68	1	female	2	1.54	49	No	Married	1	#NULL!	0	Digestive System	0	0	0	0	0	0	0	0	67.7	1	31.6	#NULL!	4.95	3.23	65.2	104	1	1	4.98	2	33	1.28	230	2	#NULL!	#NULL!	3.19	1.13	0.9	1	3.9	18
1	4773	2022-12-08 09:16:32	1	0	21.4533	74	2	male	1	1.7	62	No	Married	1	#NULL!	0	Other	0	1	1	1	0	1	0	0	66.3	1	37.8	#NULL!	13.44	8.93	66.6	130	2	1	4.53	2	39.4	3.41	190	2	0.17	9.1	4.76	1.82	0.9	1	6.3	26
1	4934	2022-12-09 08:53:12	1	0	28	66	1	female	2	1.5	63	No	Married	1	#NULL!	0	Digestive System	0	1	1	1	0	0	0	0	71.2	2	41.3	#NULL!	3.33	2.45	73.5	110	1	2	3.51	1	34.3	0.54	108	2	0.09	8.2	4.85	1.75	1.22	1	8.9	14
1	5004	2022-12-09 09:20:08	1	0	23.6244	65	1	male	1	1.62	62	No	Married	1	#NULL!	0	Respiratory System	4	0	1	0	0	0	0	0	69.4	2	43.3	#NULL!	5.22	3.31	63.4	115	1	1	3.8	1	35	1.45	238	2	0.21	9	3.91	1.31	1.26	0	7.3	25
1	4877	2022-12-09 10:15:23	1	0	22.9591	79	3	female	2	1.63	61	No	Married	1	#NULL!	0	Respiratory System	4	0	0	0	0	0	0	0	63	1	43	253	6.09	4.92	80.8	138	2	2	4.49	2	42.1	0.7	484	3	0.41	8.4	3.93	1.9	1.05	1	11.1	68
1	4936	2022-12-09 14:25:56	1	1	16.937	77	3	male	1	1.63	45	No	Other	3	#NULL!	0	Respiratory System	4	0	0	0	0	0	0	1	63.7	1	33.8	#NULL!	6.12	3.9	63.8	152	2	1	4.6	2	46.9	1.46	230	2	0.19	8.4	4.82	1.31	1.65	0	10.4	71
1	4923	2022-12-09 22:50:31	1	0	28.9597	82	4	female	2	1.34	52	No	Married	1	#NULL!	0	Nervous System	4	1	1	0	0	0	0	0	66.8	1	39.9	#NULL!	7.28	5.67	77.8	146	2	2	4.74	2	42.8	1.1	134	2	0.2	15.2	4.78	1.65	1.18	0	14.4	52
1	5008	2022-12-10 08:46:49	1	0	24.0569	73	2	male	1	1.73	72	No	Married	1	#NULL!	0	Reproductive System	4	0	0	0	0	0	0	0	73.4	2	41.8	252	5.84	3.5	59.9	132	2	1	4.41	2	39.7	1.68	311	3	0.25	8.1	7.54	1.13	1.58	#NULL!	4.8	16
1	5014	2022-12-10 10:09:07	1	0	22.1003	65	1	male	1	1.62	58	No	Married	1	#NULL!	0	Respiratory System	0	1	0	0	0	1	0	0	72.9	2	39.9	#NULL!	6.09	3.97	65.2	123	2	1	3.98	1	37.7	1.49	191	2	0.16	8.3	#NULL!	#NULL!	#NULL!	#NULL!	5.2	32
1	4990	2022-12-10 10:14:37	1	0	25.3906	68	1	female	2	1.6	65	No	Married	1	#NULL!	0	Other	0	0	0	0	0	0	0	0	73.7	2	44.7	#NULL!	4.44	2.46	55.5	136	2	1	4.22	2	41.1	1.69	165	2	0.19	11.5	5.79	1.56	1.34	#NULL!	7.3	13
1	4949	2022-12-11 11:55:10	1	0	21.5645	79	3	male	1	1.64	58	No	Married	1	#NULL!	0	Respiratory System	4	1	1	1	0	0	0	0	69.6	2	41.9	#NULL!	6.01	4.15	68.9	136	2	2	4.52	2	42.7	1.17	111	2	0.13	11.5	5.84	1.39	1.37	#NULL!	7.2	30
1	4940	2022-12-12 08:46:34	2	0	21.5019	80	3	female	2	1.57	53	No	Married	1	#NULL!	0	Digestive System	0	1	1	1	0	0	0	0	69.3	2	35.1	#NULL!	6.29	3.13	49.8	125	2	1	4.54	2	39.1	2.7	292	2	0.26	8.9	3.63	1.31	0.7	1	15.9	9
1	4988	2022-12-12 09:00:37	1	1	19.5312	75	2	male	1	1.6	50	No	Married	1	#NULL!	0	Digestive System	0	1	1	0	0	0	0	0	66.4	1	37.3	#NULL!	4.29	2.8	65.2	127	2	1	4.1	2	36.7	1	105	2	0.1	9.4	#NULL!	#NULL!	#NULL!	#NULL!	4.2	24
1	4944	2022-12-12 09:08:14	2	1	19.91	79	3	female	2	1.52	46	No	Widowed	0	#NULL!	0	Digestive System	4	0	1	1	0	0	0	0	79.5	2	33.9	213	3.82	2.01	52.5	118	1	1	3.56	1	36.4	1.01	78	1	0.06	7.7	5.01	2.64	0.94	1	12.1	14
1	4952	2022-12-12 09:41:35	1	1	17.7778	80	3	male	1	1.5	40	No	Widowed	0	#NULL!	0	Digestive System	0	0	0	0	0	0	0	0	47.5	1	30.6	#NULL!	5.21	2.99	57.5	104	1	1	3.41	1	31.9	1.75	259	2	0.19	7.4	#NULL!	#NULL!	#NULL!	#NULL!	7.9	18
1	5000	2022-12-12 09:46:15	2	0	24.9135	77	3	male	1	1.7	72	No	Married	1	#NULL!	0	Digestive System	4	0	1	1	1	0	0	0	72.4	2	45.3	303	4.8	3.52	73.4	151	2	2	4.69	2	45.2	0.7	152	2	0.12	7.6	4.51	2.12	1.14	1	8.9	30
1	5001	2022-12-12 09:57:19	1	0	21.9713	72	2	male	1	1.72	65	No	Married	1	#NULL!	0	Urinary System	0	1	1	0	1	0	0	0	81.2	2	45.2	#NULL!	8.43	5.41	64.2	138	2	1	5.65	2	45	1.82	291	2	0.26	9.1	5.08	1.32	1.64	0	6.5	21
1	4901	2022-12-12 10:22:25	2	0	25.1024	74	2	male	1	1.74	76	No	Married	1	#NULL!	0	Digestive System	0	1	0	0	0	0	0	0	60.6	1	36.3	#NULL!	6.97	5.15	73.7	153	2	2	4.79	2	44	1.29	194	2	0.19	9.8	#NULL!	#NULL!	#NULL!	#NULL!	9.2	18
1	4978	2022-12-12 10:30:39	1	0	24.6914	67	1	male	1	1.8	80	No	Married	1	#NULL!	0	Digestive System	0	1	0	0	0	0	0	0	76.9	2	42	#NULL!	3.59	2.19	61	138	2	1	4.14	2	41.8	1.05	127	2	0.11	8.8	#NULL!	#NULL!	#NULL!	#NULL!	12.8	35
1	4972	2022-12-12 10:30:50	1	0	23.4375	71	2	male	1	1.6	60	No	Married	1	#NULL!	0	Digestive System	0	1	1	0	1	0	0	0	64.6	1	40.3	#NULL!	7.11	4.12	58	156	2	1	5.18	2	47.9	1.91	236	2	0.23	9.6	2.5	1.06	0.84	1	12.9	18
1	4994	2022-12-13 12:06:44	1	0	21.6413	65	1	female	2	1.52	50	No	Married	1	#NULL!	0	Digestive System	0	1	1	1	1	0	0	0	72.1	2	41.6	#NULL!	1.97	1.32	66.9	93	1	2	3.64	1	28.3	0.25	140	2	0.14	10.1	#NULL!	#NULL!	#NULL!	#NULL!	5.6	14
1	4889	2022-12-13 15:08:57	2	1	14.0202	74	2	female	2	1.58	35	No	Married	1	#NULL!	0	Digestive System	4	0	0	0	0	0	0	1	47.7	1	17.7	#NULL!	11.17	10.3	92.2	66	1	2	2.35	1	19.8	0.57	328	3	0.29	8.9	#NULL!	#NULL!	#NULL!	#NULL!	13.2	9
1	5046	2022-12-14 08:39:10	2	0	24.0346	70	1	male	1	1.58	60	No	Married	1	#NULL!	0	Digestive System	0	0	0	0	0	0	0	0	62.1	1	38.7	#NULL!	5.07	2.05	40.5	155	2	1	4.61	2	47.7	0.97	135	2	0.14	10.5	#NULL!	#NULL!	#NULL!	#NULL!	17.3	22
1	4977	2022-12-14 09:48:17	1	0	22.8329	71	2	male	1	1.58	57	No	Married	1	#NULL!	0	Digestive System	4	0	1	0	1	0	0	0	65.8	1	36	#NULL!	5.5	3.37	61.4	135	2	1	4.29	2	40.2	1.45	123	2	0.12	9.7	#NULL!	#NULL!	#NULL!	#NULL!	9.5	31
1	4967	2022-12-14 10:00:45	1	0	22.0604	78	3	female	2	1.55	53	No	Married	1	#NULL!	0	Digestive System	0	1	0	0	0	0	0	0	81	2	49	#NULL!	4.26	1.95	45.7	120	1	1	4.95	2	39.5	1.94	282	2	0.24	8.6	#NULL!	#NULL!	#NULL!	#NULL!	12.5	28
1	5208	2022-12-15 09:26:19	2	0	26.7229	66	1	male	1	1.63	71	No	Married	1	#NULL!	0	Respiratory System	4	0	0	0	0	0	0	0	66.5	1	43.2	#NULL!	3.9	2.57	65.9	139	2	1	4.08	2	42.1	0.82	193	2	0.2	10.5	4.61	1.43	0.99	1	18.2	24
1	4852	2022-12-15 09:41:23	1	0	23.4375	82	4	male	1	1.6	60	No	Married	1	#NULL!	0	Digestive System	0	0	1	0	1	0	0	0	54.4	1	32.6	#NULL!	16.1	3.37	64.5	97	1	1	2.7	1	30	1.17	154	2	0.16	10.1	4.21	1.05	0.95	1	9.3	15
1	4778	2022-12-15 10:41:02	1	1	#NULL!	81	4	female	2	1.52	#NULL!	Yes	Widowed	0	#NULL!	1	Digestive System	4	0	0	0	0	1	0	1	62	1	36.4	#NULL!	11.54	9.14	79.3	99	1	2	3.17	1	30.7	1.42	223	2	0.21	9.5	#NULL!	#NULL!	#NULL!	#NULL!	8.6	14
1	4996	2022-12-16 10:23:12	1	0	26.4463	70	1	male	1	1.65	72	No	Married	1	#NULL!	0	Digestive System	0	1	0	0	0	0	0	0	76.6	2	41.2	#NULL!	4.13	1.86	45.1	133	2	1	4.82	2	41.5	1.73	157	2	0.15	9.7	5.09	1.47	1.23	1	3.6	37
1	5095	2022-12-16 10:23:25	1	0	22.8928	77	3	male	1	1.55	55	No	Married	1	#NULL!	0	Digestive System	0	1	0	0	0	0	0	0	65.7	1	40.2	#NULL!	5.65	2.65	47	141	2	1	4.54	2	42.9	2.26	132	2	0.16	12.3	#NULL!	#NULL!	#NULL!	#NULL!	11.4	63
1	5173	2022-12-17 10:00:32	1	0	23.03	73	2	male	1	1.68	65	No	Married	1	#NULL!	0	Reproductive System	0	0	0	1	0	0	0	0	79.1	2	46.2	#NULL!	7.34	3.31	45.2	140	2	1	4.24	2	40.8	3.18	154	2	0.14	9.3	#NULL!	#NULL!	#NULL!	#NULL!	13.6	18
1	5156	2022-12-17 10:27:16	1	0	24.4898	90	5	male	1	1.75	75	No	Married	1	#NULL!	0	Digestive System	4	0	0	0	0	1	0	0	67.1	1	38.3	#NULL!	8.15	6.77	83	134	2	2	3.69	1	38.6	0.88	96	1	0.09	9.9	#NULL!	#NULL!	#NULL!	#NULL!	8.4	10
1	4985	2022-12-17 10:31:08	1	1	17.5781	67	1	male	1	1.6	45	No	Married	1	#NULL!	0	Respiratory System	4	0	0	0	1	0	0	0	65.7	1	34.2	#NULL!	6.36	3.9	61.3	101	1	1	3.71	1	32.6	1.79	555	3	0.35	6.3	3.36	1.03	0.95	1	4.6	15
1	4959	2022-12-17 10:31:45	2	0	25.2493	68	1	male	1	1.78	80	No	Married	1	#NULL!	0	Respiratory System	0	0	1	0	0	0	0	0	79.3	2	50.6	#NULL!	7.46	4.75	63.7	179	2	1	5.48	2	54.9	2.16	186	2	0.18	9.5	#NULL!	#NULL!	#NULL!	#NULL!	11.1	28
1	5139	2022-12-17 12:06:45	1	0	25.5296	68	1	male	1	1.62	67	No	Married	1	#NULL!	0	Digestive System	0	0	1	0	0	0	0	0	62.6	1	39.8	#NULL!	0	1.83	68.4	148	2	1	2.1	1	42.5	0.6	91	1	0.14	15	3.31	0.91	1.26	0	13.8	23
1	4976	2022-12-17 14:15:44	1	0	24.093	68	1	male	1	1.68	68	No	Married	1	#NULL!	0	Respiratory System	4	0	1	0	0	0	0	0	74.8	2	41.2	#NULL!	3.84	1.59	41.4	146	2	1	4.96	2	44.9	1.81	172	2	0.14	8.1	5.11	1.81	1.37	1	7.2	29
1	5072	2022-12-17 15:05:56	1	0	21.4533	73	2	male	1	1.7	62	No	Married	1	#NULL!	0	Respiratory System	0	1	0	0	0	0	0	0	63.2	1	34.9	#NULL!	8.56	7.02	82	134	2	2	4.87	2	41.8	1.02	186	2	0.2	10.9	3.95	0.77	1.1	1	7.6	20
1	5092	2022-12-18 10:26:36	1	1	20.3428	66	1	female	2	1.52	47	No	Other	3	#NULL!	0	Digestive System	0	1	0	0	0	0	0	0	76.3	2	40.9	#NULL!	4.07	2.33	57.1	133	2	1	3.97	1	39.8	1.09	226	2	0.18	7.8	#NULL!	#NULL!	#NULL!	#NULL!	9.9	37
1	4992	2022-12-18 10:51:31	1	0	22.8329	70	1	female	2	1.58	57	No	Married	1	#NULL!	0	Reproductive System	0	0	0	0	0	0	0	0	59.4	1	36.3	#NULL!	6.01	4.18	69.5	139	2	1	4.97	2	40.6	1.49	188	2	0.22	11.7	#NULL!	#NULL!	#NULL!	#NULL!	7.2	23
1	5013	2022-12-19 09:01:39	1	1	14.8729	87	5	male	1	1.72	44	No	Widowed	0	#NULL!	0	Other	0	0	0	0	0	0	0	0	66.8	1	35.8	#NULL!	3.9	3.12	80.1	105	1	2	3.9	1	34.7	0.44	118	2	0.12	9.7	2.74	0.64	1.1	1	17.9	16
1	5140	2022-12-19 14:33:31	2	1	19.3625	71	2	male	1	1.67	54	No	Married	1	#NULL!	0	Respiratory System	4	0	1	1	0	1	0	0	70.4	2	41.3	#NULL!	5.35	3.97	74.2	117	1	2	3.8	1	35.3	0.34	133	2	0.11	7.9	4.19	1.18	1.26	0	9.2	11
1	4788	2022-12-20 09:42:08	1	0	27.7671	76	3	female	2	1.53	65	No	Married	1	#NULL!	0	Respiratory System	4	0	0	0	0	1	0	0	59.2	1	35.4	#NULL!	8.86	6.73	76	129	2	2	3.92	1	41.1	0.63	172	2	0.17	9.6	#NULL!	#NULL!	#NULL!	#NULL!	10.9	15
1	5028	2022-12-20 11:24:22	1	1	18.1662	66	1	male	1	1.74	55	No	Married	1	#NULL!	0	Other	0	0	1	0	1	1	0	0	56.5	1	34.1	#NULL!	4.75	3.42	72	116	1	2	3.93	1	35	0.75	116	2	0.12	10.7	4.36	1.38	0.63	1	9	10
1	5060	2022-12-21 08:59:05	2	0	22.2656	67	1	male	1	1.6	57	No	Other	3	#NULL!	0	Digestive System	0	0	1	0	0	0	0	0	71.8	2	31.8	#NULL!	6.61	4.74	71.7	150	2	2	4.58	2	46.2	1.29	204	2	0.2	9.9	4.83	1.11	1.1	1	15.3	51
1	5069	2022-12-21 09:05:12	2	0	21.4536	73	2	male	1	1.63	57	No	Married	1	#NULL!	0	Skin & Appendages	4	0	0	0	0	1	0	0	76.5	2	47.5	#NULL!	6.53	4.53	69.5	145	2	1	4.53	2	44.1	1.6	170	2	0.21	12.1	3.83	4	0.86	1	8.8	41
1	5107	2022-12-21 09:52:28	2	0	21.4844	76	3	male	1	1.6	55	No	Other	3	#NULL!	0	Digestive System	0	0	0	1	0	1	0	1	55.6	1	31.1	#NULL!	5.27	4.08	77.4	140	2	2	4.12	2	41	0.43	83	1	#NULL!	#NULL!	#NULL!	#NULL!	#NULL!	#NULL!	55.8	44
[truncated: 1,549 more rows]
[truncated: 16 more columns]
